# Supplementary material for: Alkynedicobalt mediated vinylogous Nazarov reactions
Source: Royal Society of Chemistry journal article supplement (doi:10.1039/d1ob02256c), 2021-12-22

## **Supplementary Information**

### **Alkynedicobalt Mediated Vinylogous Nazarov Reactions**

Somaiah Almubayedh and James R. Green

Department of Chemistry and Biochemistry, University of Windsor, Windsor, ON, N9B 3P4,  
Canada

#### **Table of Contents**

|                                                                         |           |
|-------------------------------------------------------------------------|-----------|
| <b>1. General Considerations</b>                                        | <b>2</b>  |
| <b>2. Experimental Procedures for New Compounds</b>                     | <b>2</b>  |
| <b>3. References</b>                                                    | <b>29</b> |
| <b>4. <sup>1</sup>H and <sup>13</sup>C NMR Spectra of New Compounds</b> | <b>30</b> |

**General Considerations.** Reagents were obtained from commercial sources otherwise stated. Reactions were conducted under inert atmosphere (N<sub>2</sub>) using glassware dried in an oven (110 °C, > 1h). The solvent for each reaction was acquired from a solvent purification system (Innovative Technologies). Flash chromatography was performed according to the method of Still.<sup>1</sup> High-Resolution Mass Spectrometry (HRMS) results were obtained via a Direct Insertion Probe-Electron Ionization method (70 eV), on a GCT Time of Flight (Tof) Mass Spectrometer at the McMaster Regional Centre for Mass Spectrometry, and in the University of Windsor Mass Spectrometry lab with a Tof mass spectrometer using the Atmospheric Solids Analysis Probe (ASAP) and a corona discharge to facilitate ionization. <sup>1</sup>H NMR spectra were obtained on 300 or 500 MHz spectrometers. Chemical shifts ( $\delta$ ) are reported in parts per million (ppm), relative to the 7.27 ppm resonance for the residual CHCl<sub>3</sub> in CDCl<sub>3</sub>, unless otherwise indicated. Coupling constants are reported in Hertz (Hz). <sup>13</sup>C NMR data were obtained at either 75 or 125 MHz. Infrared spectra (IR) were recorded neat on a FT-IR spectrophotometer using an ATR attachment.

## Experimental Procedures for New Compounds

### 5-(3-Methoxyphenyl)-2-methylpent-1-en-4-yn-3-ol (6a):

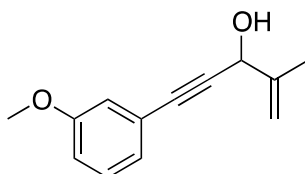

**General procedure A:** In a round bottom flask, 1-ethynyl-3-methoxybenzene (0.2738 g, 2.07 mmol) was dissolved in dry THF (10 mL). The flask was cooled to -78 °C under N<sub>2</sub>, at which point <sup>n</sup>BuLi (2.5 M in hexanes, 1.2 mL, 3.1 mmol, 1.5 equiv) was added dropwise at -78 °C and allowed to stir. After 45 minutes, the reaction mixture was allowed to warm to 0 °C. At this point was added a solution of **methacrolein** (2.0 equiv, 0.34 mL, 4.1 mmol) dissolved in THF (3 mL) and allowed to stir for 30 minutes. After this time, the reaction mixture was allowed to warm to room temperature and then NH<sub>4</sub>Cl (aq., sat.) was added. This was extracted with Et<sub>2</sub>O (3 x 100 mL), then dried with MgSO<sub>4</sub>, filtered, and the solvent removed under reduced pressure.

The crude material was obtained and purified by radial chromatography (1:1 hexanes : Et<sub>2</sub>O) to yield the product **6a**, as a yellow viscous oil (0.3232 g, 1.60 mmol, 77 % yield); IR  $\nu_{\max}$  3388 (broad), 3075, 2943, 2837, 2225, 1702, 1655, 1598, 1576  $\text{cm}^{-1}$ ; <sup>1</sup>H NMR (300 MHz, CDCl<sub>3</sub>)  $\delta$  7.19 (apparent t, J = 7.9 Hz, 1H), 7.05 (apparent dt, J = 7.6, 1.2 Hz, 1H), 6.98 (m, 1H), 6.89 (ddd, J = 8.4, 2.7, 0.9 Hz, 1H), 5.26 (s, 1H), 5.03 (s, 1H), 4.99 (s, 1H), 3.80 (s, 3H), 2.19 (br s, 1H), 1.94 (s, 3H); <sup>13</sup>C NMR (75 MHz, CDCl<sub>3</sub>) 159.3, 144.0, 129.4, 124.3, 123.5, 116.6, 115.2, 112.6, 87.9, 85.8, 66.7, 55.3, 18.2; **HRMS** *m/e* for C<sub>13</sub>H<sub>14</sub>O<sub>2</sub> [M-H<sup>+</sup>] calculated 201.0916, found 201.0915.

**2-Methyl-5-(3,4,5-trimethoxyphenyl)pent-1-en-4-yn-3-ol (6b):**

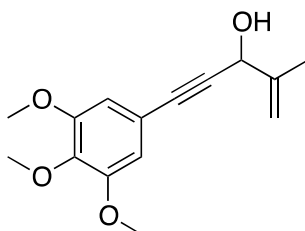

Compound **6b** was prepared according to **General Procedure A**, using 5-ethynyl-1,2,3-trimethoxybenzene as starting material (0.7147 g, 3.718 mmol) and **methacrolein** (2 equiv, 0.52 g, 0.62 mL, 7.4 mmol). Compound **6b** was isolated following column chromatography (2:1 hexane : Et<sub>2</sub>O) as a colourless solid (0.794 g, 3.031 mmol, 56 % yield), m.p. 103-106 °C; IR  $\nu_{\max}$  3434 (broad), 3010, 2971, 2945, 2876, 2842, 1577, 1501  $\text{cm}^{-1}$ ; <sup>1</sup>H NMR (300 MHz, CDCl<sub>3</sub>)  $\delta$  6.67 (s, 2H), 5.24 (s, 1H), 5.01 (d, J = 5.4 Hz, 1H), 4.98 (s, 1H), 3.84 (s, 3H), 3.83 (s, 6H), 2.26 (br s, 1H), 1.93 (s, 3H); <sup>13</sup>C NMR (75 MHz, CDCl<sub>3</sub>) 152.9, 143.9, 138.8, 117.4, 112.5, 108.8, 87.0, 85.7, 66.6, 60.9, 56.1, 18.2; **HRMS** *m/e* for C<sub>15</sub>H<sub>18</sub>O<sub>4</sub> [M<sup>+</sup>] calculated 262.1205, found 262.1207.

**5-(3,5-Dimethoxyphenyl)-2-methylpent-1-en-4-yn-3-ol (6c):**

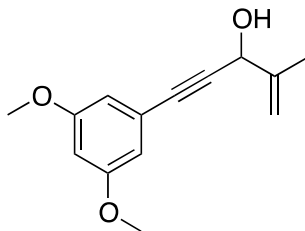

Compound **6c** was prepared according to **General Procedure A**, using of 1-ethynyl-3,5-dimethoxybenzene as starting material (0.2951 g, 1.818 mmol) and **methacrolein** (2 equiv, 0.2500 g, 0.30 mL, 3.600 mmol). Compound **6c** was isolated following column chromatography (1:1 petroleum ether : Et<sub>2</sub>O) as a yellow oil (0.2677 g, 1.152 mmol, 64 % yield). IR  $\nu_{\max}$  3405 (broad), 3083, 2941, 2840, 2225, 1586  $\text{cm}^{-1}$ ; <sup>1</sup>H NMR (300 MHz, CDCl<sub>3</sub>)  $\delta$  6.59 (d, J = 2.4 Hz, 2H), 6.44 (t, J = 2.4 Hz, 1H), 5.24 (d, J = 0.9 Hz, 1H), 5.01 (s, 1H), 4.98 (apparent t, J = 1.5 Hz, 1H), 3.77 (s, 6H), 2.10 (br s, 1H), 1.93 (s, 3H); <sup>13</sup>C NMR (75 MHz, CDCl<sub>3</sub>) 160.2, 143.7, 123.4, 112.4, 109.2, 101.7, 87.3, 85.6, 66.4, 55.1, 17.9; **HRMS(EI)** *m/e* for C<sub>14</sub>H<sub>16</sub>O<sub>3</sub> [M<sup>+</sup>] calculated 232.1099, found 232.1090.

**2-Methyl-5-(1-methyl-1*H*-indol-2-yl)pent-1-en-4-yn-3-ol (6d):**

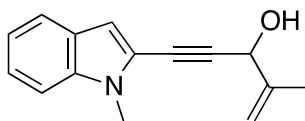

**General Procedure G:** Compound **6d** was prepared using a Sonogashira coupling reaction. In a two necked round bottom flask, 2-iodo-1-methyl-1*H*-indole (0.5637g, 2.193 mmol) and 5-(trimethylsilyl)pent-1-en-4-yn-3-ol<sup>2</sup> (1.02 equiv, 0.3764 g, 2.443 mmol) were dissolved in degassed THF (3.5 mL). Triethylamine (Et<sub>3</sub>N) (10 mL). Pd(PPh<sub>3</sub>)<sub>4</sub> (0.0800 g, 0.066 mmol, 3 mol%) and CuI (0.0250 g, 0.109 mmol, 5 mol%) were added under N<sub>2</sub>. TBAF (1.15 equiv, 2.5 mL) was added dropwise to the reaction flask. The reaction was allowed to stir for 14 hours at room temperature. After this time, the reaction was filtered through Celite<sup>®</sup>, dissolved in Et<sub>2</sub>O (60 mL), and extracted with NH<sub>4</sub>Cl (aq., sat., 2 X 60 mL), followed by brine (1 X 60 mL). The organic fraction was dried over MgSO<sub>4</sub>, filtered, and the solvent removed under reduced pressure. Column chromatography (2:1 hexane : Et<sub>2</sub>O) eluted the product **6d** (0.4303 g, 1.909 mmol, 87 % yield), as a dark yellow solid, m.p. 70-72 °C; IR  $\nu_{\max}$  3360 (broad), 3056, 2974,

2942, 2918, 2878, 2225, 2061, 2027  $\text{cm}^{-1}$ ;  $^1\text{H}$  NMR (500 MHz,  $\text{CDCl}_3$ )  $\delta$  7.60 (dd,  $J = 8.0, 0.7$  Hz, 1H), 7.29 (d,  $J = 4.2$  Hz, 2H), 7.14 (m, 1H), 6.80 (s, 1H), 5.31 (s, 1H), 5.13 (d,  $J = 5.8$  Hz, 1H), 5.05 (s, 1H), 3.81 (s, 3H), 2.19 (m, 1H), 1.99 (s, 3H);  $^{13}\text{C}$  NMR (125 MHz,  $\text{CDCl}_3$ ) 143.6, 137.1, 127.0, 123.1, 121.1, 121.0, 120.1, 112.9, 109.4, 107.8, 94.0, 77.7, 66.9, 30.6, 18.2; **HRMS**  $m/e$  for  $\text{C}_{15}\text{H}_{15}\text{NO}$  [ $\text{M}+\text{H}^+$ ] calculated 226.1232, found 226.1232.

**1-(3,5-Dimethoxyphenyl)-4-methylenehex-1-yn-3-ol (6e):**

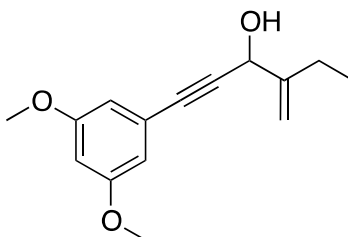

Following **General Procedure A**, 1-ethynyl-3,5-dimethoxybenzene (0.1217 g, 0.750 mmol) was used with **2-methylenebutanal** (2 equiv, 0.15 mL, 1.5 mmol). Compound **6e** was isolated following preparative chromatography (2:1 hexane :  $\text{Et}_2\text{O}$ ) as a colourless viscous oil (0.0886 g, 0.360 mmol, 48 % yield). IR  $\nu_{\text{max}}$  3413, 2963, 2937, 2876, 2840, 1589  $\text{cm}^{-1}$ ;  $^1\text{H}$  NMR (300 MHz,  $\text{CDCl}_3$ )  $\delta$  6.59 (d,  $J = 2.3$  Hz, 2H), 6.44 (t,  $J = 2.3$  Hz, 1H), 5.33 (apparent t,  $J = 1.2$  Hz, 1H), 5.05 (s, 1H), 5.00 (s, 1H), 3.77 (s, 6H), 2.30 (q,  $J = 7.5$  Hz, 2H), 1.98 (br s, 1H), 1.15 (t,  $J = 7.5$  Hz, 3H);  $^{13}\text{C}$  NMR (75 MHz,  $\text{CDCl}_3$ ) 160.5, 149.7, 123.8, 110.4, 109.5, 101.9, 87.8, 85.8, 66.2, 55.4, 24.5, 12.2; **HRMS**  $m/e$  for  $\text{C}_{15}\text{H}_{18}\text{O}_3$  [ $\text{M}-\text{H}^+$ ] calculated 245.1178, found 245.1175.

**2-Benzyl-5-(3,5-dimethoxyphenyl)pent-1-en-4-yn-3-ol (6f):**

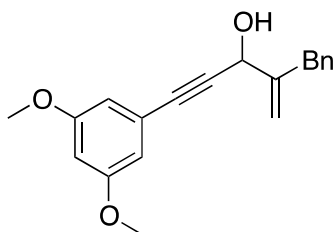

Following **General Procedure A**: 1-ethynyl-3,5-dimethoxybenzene (0.1087 g, 0.670 mmol) was used with **2-benzylacrylaldehyde** (2 equiv, 0.1958 g, 1.340 mmol). Compound **6f** was isolated following column chromatography (3:1 Hexane : Et<sub>2</sub>O) as a viscous yellow oil (0.1590 g, 0.515 mmol, 77 % yield). IR  $\nu_{\max}$  3372 (broad), 2924, 2842, 1587, 1452 cm<sup>-1</sup>; <sup>1</sup>H NMR (300 MHz, CDCl<sub>3</sub>)  $\delta$  7.18-7.36 (m, 5H), 6.59 (d, J = 2.4 Hz, 2H), 6.46 (t, J = 2.4 Hz, 1H), 5.46 (s, 1H), 5.00 (br s, 1H), 4.95 (s, 1H), 3.78 (s, 6H), 3.62 (s, 2H), 2.15 (d, J = 5.4 Hz, 1H); <sup>13</sup>C NMR (125 MHz, CDCl<sub>3</sub>) 160.4, 147.4, 138.8, 129.2, 128.4, 126.3, 123.7, 113.7, 109.5, 101.9, 87.5, 86.3, 65.2, 55.4, 38.8; **HRMS** *m/e* for C<sub>20</sub>H<sub>20</sub>O<sub>3</sub> [M<sup>+</sup>] calculated 308.1412, found 308.1417.

**1-(3,5-Dimethoxyphenyl)-5-methyl-4-methylenehex-1-yn-3-ol (6g):**

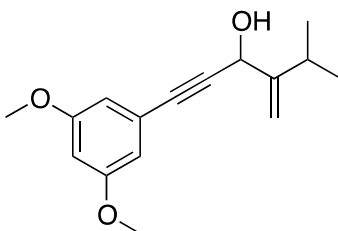

Following **General Procedure A**, 1-ethynyl-3,5-dimethoxybenzene (0.5407 g, 3.333 mmol) was used with **3-methyl-2-methylidenebutanal** (2 equiv, 0.6500 g, 0.80 mL, 6.700 mmol). Compound **6g** was isolated following column chromatography (5:1 petroleum ether : Et<sub>2</sub>O) as a yellow viscous oil (0.7118 g, 2.734 mmol, 82 % yield). IR  $\nu_{\max}$  3436 (broad), 2962, 2873, 2841, 2250, 1588 cm<sup>-1</sup>; <sup>1</sup>H NMR (500 MHz, CDCl<sub>3</sub>)  $\delta$  6.60 (d, J = 2.4 Hz, 2H), 6.45 (t, J = 2.4 Hz, 1H), 5.40 (s, 1H), 5.10 (s, 1H), 5.05 (s, 1H), 3.77 (s, 6H), 2.60 (septet, J = 6.9 Hz, 1H), 2.24 (br, 1H), 1.16 (d, J = 6.9 Hz, 6H); <sup>13</sup>C NMR (125 MHz, CDCl<sub>3</sub>) 160.4, 154.6, 123.8, 109.5, 101.8, 88.1, 85.7, 65.3, 55.3, 30.1, 22.6; **HRMS** *m/e* for C<sub>16</sub>H<sub>20</sub>O<sub>3</sub> [M<sup>+</sup>] calculated 260.1412, found 260.1414.

**5-(3,5-Dimethoxyphenyl)-2-(triisopropylsilyl)pent-1-en-4-yn-3-ol (6h):**

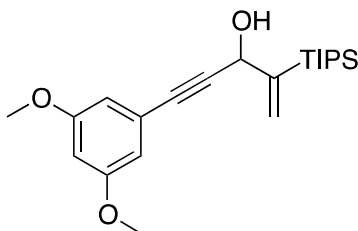

Compound **6g** was prepared according to **General Procedure A**. 1-ethynyl-3,5-dimethoxybenzene as starting material (0.0707 g, 0.692 mmol) was used with **2-(triisopropylsilyl)acrylaldehyde** (2 equiv, 6.516 g, 1.384 mmol). Compound **6h** was isolated following column chromatography (5:1 Hexane : Et<sub>2</sub>O) as a yellow oil (0.0553 g, 0.148 mmol, 34 % yield). IR  $\nu_{\max}$  3420 (broad), 2941, 2864, 1588, 1458, 1419, 1383 cm<sup>-1</sup>; <sup>1</sup>H NMR (300 MHz, CDCl<sub>3</sub>)  $\delta$  6.60 (d, J = 2.4 Hz, 2H), 6.42-6.47 (m, 2H), 5.63 (dd, J = 1.9, 0.7 Hz, 1H), 5.21 (s, 1H), 3.78 (s, 6H), 2.03 (br s, 1H), 1.29 (m, 3H), 1.12 (d, J = 6.9 Hz, 18H); <sup>13</sup>C NMR (75 MHz, CDCl<sub>3</sub>) 160.4, 146.5, 129.0, 124.0, 109.4, 101.8, 88.8, 86.4, 65.5, 55.4, 18.8, 11.3; **HRMS** *m/e* for C<sub>22</sub>H<sub>34</sub>O<sub>3</sub>Si [M+H<sup>+</sup>] calculated 375.2355, found 375.2344.

**5-(Cyclohex-1-en-1-yl)-2-methylpent-1-en-4-yn-3-ol (6i):**

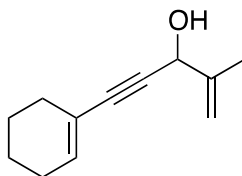

Compound **6i** was prepared according to **General Procedure A**. 1-ethynylcyclohex-1-ene as starting material (0.60 g, 0.66 mL, 5.6 mmol) was used with **methacrolein** (2 equiv, 0.79 g, 0.93 mL, 11 mmol). Compound **6i** was isolated following column chromatography (5:1 Hexane : Et<sub>2</sub>O) as a clear to yellowish oil (0.4881 g, 2.769 mmol, 49 % yield). IR  $\nu_{\max}$  3348 (broad), 3080, 2931, 2863, 2186, 1711, 1647, 1614 cm<sup>-1</sup>; <sup>1</sup>H NMR (300 MHz, CDCl<sub>3</sub>)  $\delta$  6.12 (m, 1H), 5.15 (s, 1H), 4.87-4.93 (m, 2H), 2.03-2.16 (m, 4H), 1.87 (s, 3H), 1.52-1.68 (m, 4H); <sup>13</sup>C NMR (300 MHz, CDCl<sub>3</sub>) 144.3, 135.5, 120.0, 112.1, 111.1, 87.7, 85.3, 66.6, 29.0, 25.6, 22.2, 21.4, 18.0; **HRMS** *m/e* for C<sub>12</sub>H<sub>16</sub>O [M<sup>+</sup>-H<sup>+</sup>] calculated 175.1123, found 175.1126.

**5-(Cyclohex-1-en-1-yl)-2-(triisopropylsilyl)pent-1-en-4-yn-3-ol (6j):**

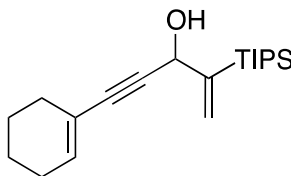

Following **General Procedure A**: 1-ethynylcyclohexene (3 equiv, 0.18 mL, 1.5 mmol) was used with **2-triisopropylsilylacrolein** (0.0986 g, 0.464 mmol). Preparative TLC (20:1 hexane : Et<sub>2</sub>O) afforded compound **6j** as a colourless viscous liquid (0.0597 g, 0.187 mmol, 40 % yield). IR  $\nu_{\text{max}}$  3401 (broad), 2930, 2864, 2214, 1698, 1459  $\text{cm}^{-1}$ ; <sup>1</sup>H NMR (300 MHz, CDCl<sub>3</sub>)  $\delta$  6.36 (apparent t, J = 1.5, 1H), 6.11 (m, 1H), 5.56 (dd, J = 3.5, 1.4 Hz, 1H), 5.09 (s, 1H), 2.05-2.16 (m, 4H), 1.82 (br s, 1H), 1.52-1.70 (m, 4H), 1.19-1.35 (m, 3H), 1.09 (d, J = 6.9 Hz, 18H); <sup>13</sup>C NMR (75 MHz, CDCl<sub>3</sub>) 146.8, 135.1, 128.6, 120.2, 88.4, 86.5, 65.5, 29.0, 25.6, 22.2, 21.4, 18.8, 11.2; **HRMS**  $m/e$  for C<sub>20</sub>H<sub>34</sub>OSi [M<sup>+</sup>-H<sup>+</sup>] calculated 317.2301, found 317.2292.

**(E)-1-(3,5-dimethoxyphenyl)-4-methylhex-4-en-1-yn-3-ol (6k):**

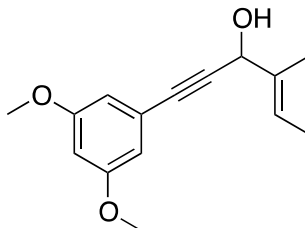

Following **General Procedure A**: 1-ethynyl-3,5-dimethoxybenzene (0.1148 g, 0.708 mmol) was used with tiglic aldehyde ((*E*)-2-methylbut-2-enal) (2 equiv, 0.12 g, 0.14 mL, 1.0 mmol). The crude yellow oil was obtained and purified by radial chromatography (5:1 hexanes : Et<sub>2</sub>O) to yield **6k**, as a yellow viscous oil (0.1521 g, 0.617 mmol, 87 % yield); IR  $\nu_{\text{max}}$  3414 (broad), 2959, 2935, 2200, 1690, 1647, 1589, 1454, 1420  $\text{cm}^{-1}$ ; <sup>1</sup>H NMR (500 MHz, CDCl<sub>3</sub>)  $\delta$  6.60 (d, J = 2.3 Hz, 2H), 6.44 (t, J = 2.3 Hz, 1H), 5.77 (m, 1H), 4.97 (s, 1H), 3.77 (s, 6H), 2.32 (br, 1H), 1.82 (s, 3H), 1.68 (d, J = 6.8 Hz, 3H); <sup>13</sup>C NMR (125 MHz, CDCl<sub>3</sub>) 160.6, 135.0,



124.0, 123.0, 109.6, 102.0, 88.1, 86.0, 68.7, 55.5, 13.4, 12.2; **HRMS**  $m/e$  for  $C_{15}H_{18}O_3$  [ $M^+$ ] calculated 246.1256, found 246.1247.

**5-(3-Methoxyphenyl)-2-methylpent-1-en-4-yn-3-one (7a):**

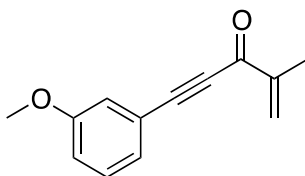

**General procedure B:** In a round bottom flask, alkynol **6a** (0.0500 g, 0.247 mmol) was dissolved in anhydrous  $CH_2Cl_2$  (10 mL). To this flask, pyridinium dichromate (PDC) powder (1.5 equiv, 0.1391 g, 0.370 mmol) was added in one portion, and the mixture allowed to stir at room temperature. Following stirring for overnight, the solution was filtered through a silica gel plug to remove the excess solid. The filtrate was concentrated under reduced pressure and purified by column chromatography (15:1 hexane :  $Et_2O$ ) to obtain the dienynone, **7a** (0.0426 g, 0.212 mmol, 86 % yield), as a yellow oil; IR  $\nu_{max}$  3073, 2926, 2839, 2196, 1637, 1598, 1576  $cm^{-1}$ ;  $^1H$  NMR (300 MHz,  $CDCl_3$ )  $\delta$  7.29 (apparent t,  $J = 7.7$  Hz, 1H), 7.19 (dt,  $J = 7.6, 2.5$  Hz, 1H), 7.11 (m, 1H), 7.00 (ddd,  $J = 8.3, 2.5, 1.8$  Hz, 1H), 6.56 (s, 1H), 6.10 (s, 1H), 3.83 (s, 3H), 1.98 (s, 3H);  $^{13}C$  NMR (75 MHz,  $CDCl_3$ ) 180.1, 159.4, 145.3, 130.8, 129.7, 125.4, 121.2, 117.3, 91.3, 85.7, 55.4, 16.2; **HRMS**  $m/e$  for  $C_{13}H_{12}O_2$  [ $M+H^+$ ] calculated 201.0916, found 201.0915.

**2-Methyl-5-(3,4,5-trimethoxyphenyl)pent-1-en-4-yn-3-one (7b):**

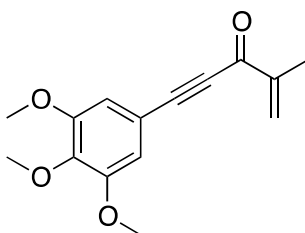

Compound **7b** was prepared according to **General Procedure B**, using compound **6b** as starting material (0.1531 g, 0.583 mmol) with PDC powder (1.5 equiv, 0.3289 g, 0.874 mmol).

Compound **7b** was isolated following column chromatography (1:1 petroleum ether : Et<sub>2</sub>O) as a yellow solid (0.1289 g, 0.495 mmol, 85 % yield), m.p. 99-101 °C; IR  $\nu_{\max}$  3002, 2934, 2837, 2195, 1639, 1623, 1573, 1500 cm<sup>-1</sup>; <sup>1</sup>H NMR (300 MHz, CDCl<sub>3</sub>)  $\delta$  6.81 (s, 2H), 6.51 (d, J = 0.9 Hz, 1H), 6.06 (d, J = 0.9 Hz, 1H), 3.83 (s, 3H), 3.82 (s, 6H), 1.94 (s, 3H); <sup>13</sup>C NMR (75 MHz, CDCl<sub>3</sub>) 180.2, 153.3, 145.3, 140.9, 130.8, 115.0, 110.3, 91.9, 85.5, 61.1, 56.4, 16.3; **HRMS** *m/e* for C<sub>15</sub>H<sub>16</sub>O<sub>4</sub> [M+H<sup>+</sup>] calculated 261.1127, found 261.1133.

**5-(3,5-Dimethoxyphenyl)-2-methylpent-1-en-4-yn-3-one (7c):**

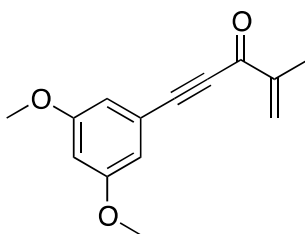

Compound **7c** was prepared according to **General Procedure B**, using compound **6c** as starting material (0.0446 g, 0.191 mmol) with pyridinium dichromate (PDC) powder (1.5 equiv, 0.1077 g, 0.286 mmol). Compound **7c** was isolated following column chromatography (15:1 petroleum ether : Et<sub>2</sub>O) as a yellow oil (0.0381 g, 0.165 mmol, 87 % yield). IR  $\nu_{\max}$  2930, 2842, 2198, 1678, 1636, 1587 cm<sup>-1</sup>; <sup>1</sup>H NMR (300 MHz, CDCl<sub>3</sub>)  $\delta$  6.99 (d, J = 2.3 Hz, 2H), 6.51-6.56 (m, 2H), 6.08 (s, 1H), 3.78 (s, 6H), 1.95 (s, 3H); <sup>13</sup>C NMR (75 MHz, CDCl<sub>3</sub>) 180.3, 160.6, 145.2, 130.7, 121.4, 110.5, 103.9, 91.3, 85.3, 55.5, 16.1; **HRMS** *m/e* for C<sub>14</sub>H<sub>14</sub>O<sub>3</sub> [M<sup>+</sup>] calculated 231.1021, found 231.1025.

**2-Methyl-5-(1-methyl-1H-indol-2-yl)pent-1-en-4-yn-3-one (7d):**

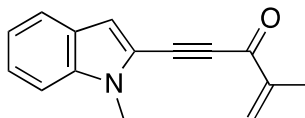

Compound **7d** was prepared according to **General Procedure B**, by the reaction of compound **6d** as starting material (0.2201 g, 0.976 mmol) and PDC powder (1.5 equiv, 0.5507 g,

1.464 mmol). Compound **7d** was isolated following column chromatography (1:1 petroleum ether : Et<sub>2</sub>O) as a yellow oil (0.1307 g, 0.585 mmol, 60 % yield). IR  $\nu_{\max}$  2954, 2920, 2852, 2181, 1622, 1516 cm<sup>-1</sup>; <sup>1</sup>H NMR (300 MHz, CDCl<sub>3</sub>)  $\delta$  7.62 (d, J = 8.0 Hz, 1H), 7.32 (m, 2H), 7.15 (m, 1H), 7.05 (s, 1H), 6.53 (s, 1H), 6.10 (s, 1H), 3.88 (s, 3H), 1.99 (s, 3H); <sup>13</sup>C NMR (75 MHz, CDCl<sub>3</sub>) 179.4, 145.2, 138.2, 130.1, 126.8, 124.8, 121.7, 120.7, 118.8, 112.5, 109.8, 93.3, 84.0, 30.9, 16.3; **HRMS** *m/e* for C<sub>15</sub>H<sub>13</sub>NO [M<sup>+</sup> + H<sup>+</sup>] calculated 224.1075, found 224.1081.

**1-(3,5-Dimethoxyphenyl)-4-methylenehex-1-yn-3-one (7e):**

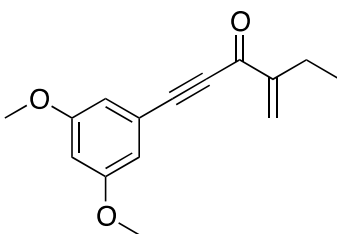

Compound **7e** was prepared according to **General Procedure B**, using compound **6e** as starting material (0.0992 g, 0.375 mmol) and the oxidation reagent PDC powder (1.5 equiv, 0.2116 g, 0.562 mmol). After 12 h, compound **7e** was isolated following column chromatography (5:1 petroleum ether : Et<sub>2</sub>O) as a yellow oil (0.0839 g, 0.352 mmol, 94 % yield). IR  $\nu_{\max}$  2964, 2936, 2876, 2841, 2197, 1636 cm<sup>-1</sup>; <sup>1</sup>H NMR (300 MHz, CDCl<sub>3</sub>)  $\delta$  6.73 (d, J = 2.4 Hz, 2H), 6.57 (s, 1H), 6.55 (t, J = 2.4 Hz, 1H), 6.04 (s, 1H), 3.79 (s, 6H), 2.38 (q, J = 7.5 Hz, 2H), 1.09 (t, J = 7.5 Hz, 3H); <sup>13</sup>C NMR (75 MHz, CDCl<sub>3</sub>) 179.9, 160.7, 151.0, 129.3, 121.5, 110.5, 104.0, 91.1, 85.6, 55.5, 22.6, 12.4; **HRMS** *m/e* for C<sub>15</sub>H<sub>16</sub>O<sub>3</sub> [M+H<sup>+</sup>] calculated 245.1178, found 245.1185.

**2-Benzyl-5-(3,5-dimethoxyphenyl)pent-1-en-4-yn-3-one (6f):**

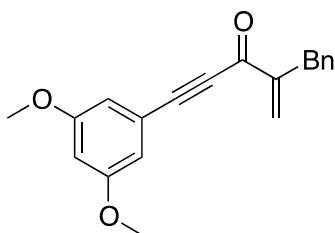

Compound **7f** was prepared according to **General Procedure B**, using compound **6f** as starting material (0.1341 g, 0.434 mmol) and the oxidation reagent PDC powder (1.5 equiv, 0.2449 g, 0.651 mmol). After 12 h, compound **7f** was isolated following column chromatography (5:1 hexane : Et<sub>2</sub>O) as a tan oil (0.0864 g, 0.282 mmol, 65 % yield). IR  $\nu_{\max}$  2964, 2936, 2876, 2841, 2197, 1636 cm<sup>-1</sup>; <sup>1</sup>H NMR (300 MHz, CDCl<sub>3</sub>)  $\delta$  7.17-7.35 (m, 5H), 6.72 (d, J = 2.4 Hz, 2H), 6.65 (s, 1H), 6.55 (t, J = 2.4 Hz, 1H), 5.90 (s, 1H), 3.79 (s, 6H), 3.69 (s, 2H); <sup>13</sup>C NMR (75 MHz, CDCl<sub>3</sub>) 179.4, 160.8, 149.1, 138.5, 131.8, 129.3, 128.6, 126.5, 121.4, 110.6, 104.1, 91.7, 85.6, 55.6, 35.8; **HRMS** *m/e* for C<sub>20</sub>H<sub>18</sub>O<sub>3</sub> [M<sup>+</sup>] calculated 306.1256, found 306.1257.

**1-(3,5-Dimethoxyphenyl)-5-methyl-4-methylenehex-1-yn-3-one (7g):**

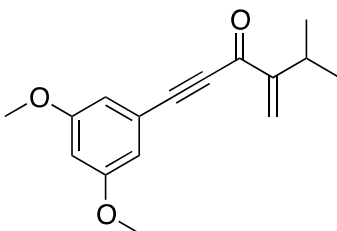

Compound **7g** was prepared according to **General Procedure B**, by the reaction of compound **6g** as starting material (0.1264 g, 0.485 mmol) with PDC powder (1.5 equiv, 0.2738 g, 0.728 mmol). After 12 h, compound **7g** was isolated following column chromatography (5:1 petroleum ether : Et<sub>2</sub>O) as a yellow oil (0.1170 g, 0.453 mmol, 93 % yield). IR  $\nu_{\max}$  2962, 2873, 2841, 2197, 1637, 1586 cm<sup>-1</sup>; <sup>1</sup>H NMR (500MHz, CDCl<sub>3</sub>)  $\delta$  6.73 (d, J = 2.1 Hz, 2H), 6.59 (s, 1H), 6.55 (t, J = 2.1 Hz, 1H), 6.04 (s, 1H), 3.79 (s, 6H), 2.98 (septet, J = 6.9 Hz, 1H), 1.10 (d, J = 6.9 Hz, 6H); <sup>13</sup>C NMR (125 MHz, CDCl<sub>3</sub>) 179.8, 160.6, 155.6, 128.1, 121.4, 110.4, 103.8, 90.8, 85.8, 55.5, 27.0, 21.7; **HRMS** *m/e* for C<sub>16</sub>H<sub>18</sub>O<sub>3</sub> [M<sup>+</sup>+H<sup>+</sup>] calculated 259.1334, found 259.1334.

**5-(Cyclohex-1-en-1-yl)-2-methylpent-1-en-4-yn-3-one (7i):**

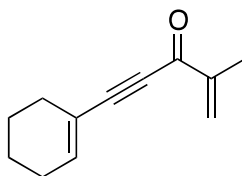

Compound **7i** was prepared according to **General Procedure B**, using compound **6i** as starting material (0.4440 g, 2.521 mmol) and PDC powder (1.5 equiv, 1.4226 g, 3.781 mmol). After 12 h, compound **7i** was isolated following column chromatography (5:1 hexane : Et<sub>2</sub>O) as a yellow oil (0.3134 g, 1.789 mmol, 71 % yield). IR  $\nu_{\max}$  2930, 2865, 2184, 1635, 1617 cm<sup>-1</sup>; <sup>1</sup>H NMR (300 MHz, CDCl<sub>3</sub>)  $\delta$  6.45 (m, 1H), 6.39 (s, 1H), 5.97 (s, 1H), 2.10-2.23 (m, 4H), 1.90 (s, 3H), 1.55-1.71 (m, 4H); <sup>13</sup>C NMR (75 MHz, CDCl<sub>3</sub>) 180.2, 145.2, 141.7, 130.0, 119.0, 93.8, 84.2, 28.3, 26.0, 21.9, 21.1, 16.1; **HRMS** *m/e* for C<sub>12</sub>H<sub>14</sub>O [M+H<sup>+</sup>] calculated 175.1123, found 175.1124.

**Hexacarbonyl[ $\mu$ - $\eta^4$  (5-(3-methoxyphenyl)-2-methylpent-1-en-4-yn-3-one)]dicobalt (Co-Co) (**4a**):**

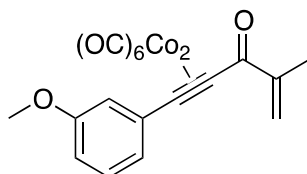

**General procedure D:** Dienynone **7a** (0.1551 g, 0.771 mmol) was dissolved in anhydrous CH<sub>2</sub>Cl<sub>2</sub> and cooled to 0 °C using an ice bath. An excess amount of dicobalt octacarbonyl (Co<sub>2</sub>(CO)<sub>8</sub>) was added to this solution and the reaction was stirred while maintaining the temperature at 0 °C. After 2 h, the mixture was concentrated under reduced pressure in a cold water bath, obtaining the crude product as a dark red material. This crude material was purified on a plug of silica, first washing with 100% petroleum ether to remove the remaining Co<sub>2</sub>(CO)<sub>8</sub>, followed by a second washing with 100% Et<sub>2</sub>O to obtain product **4a** (0.2750 g, 0.639 mmol, 83 % yield), as a dark red solid, m.p. 58-60 °C; UV-vis (CHCl<sub>3</sub>)  $\lambda_{\max}$  = 545 nm,  $\epsilon$  = 221 M<sup>-1</sup>cm<sup>-1</sup>; IR  $\nu_{\max}$  3081, 2935, 2842, 2093, 2057, 2008, 1626 cm<sup>-1</sup>; <sup>1</sup>H NMR (500 MHz, CDCl<sub>3</sub>)  $\delta$  7.29 (apparent t, J = 7.8 Hz, 1H), 7.11 (d, J = 7.6 Hz, 1H), 7.05 (s, 1H), 6.90 (dd, J = 8.1, 1.8 Hz, 1H), 5.86 (s, 1H), 5.81 (s, 1H), 3.83 (s, 3H), 2.07 (s, 3H); <sup>13</sup>C NMR (125 MHz, CDCl<sub>3</sub>) 198.3 (broad), 194.8, 159.9, 144.0, 138.2, 130.1, 126.1, 122.4, 115.3, 113.9, 91.7, 85.7, 55.3, 18.4; **HRMS(EI)** *m/e* for C<sub>19</sub>H<sub>12</sub>Co<sub>2</sub>O<sub>8</sub> [M<sup>+</sup>-2CO] calculated 429.9297, found 429.9298.

**Hexacarbonyl[ $\mu$ - $\eta^4$  (2-methyl-5-(3,4,5-trimethoxyphenyl)pent-1-en-4-yn-3-one)]dicobalt (Co-Co) (4b):**

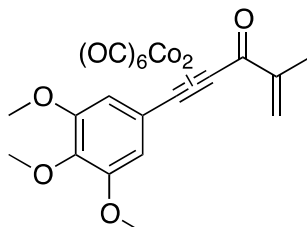

Compound **4b** was prepared according to **General Procedure D**, using compound **7b** as starting material (0.0900 g, 0.346 mmol) with an excess amount of  $\text{Co}_2(\text{CO})_8$ . Compound **4b** was isolated following column chromatography (1:1 petroleum ether :  $\text{Et}_2\text{O}$ ) as a red solid (0.1570 g, 0.287 mmol, 83 % yield), m.p. 65-68 °C; IR  $\nu_{\text{max}}$  3012, 2954, 2932, 2831, 2094, 2067, 2016, 1620, 1573  $\text{cm}^{-1}$ ;  $^1\text{H}$  NMR (500 MHz,  $\text{CDCl}_3$ )  $\delta$  6.77 (s, 2H), 5.94 (s, 1H), 5.84 (s, 1H), 3.90 (s, 3H), 3.85 (s, 6H), 2.08 (s, 3H);  $^{13}\text{C}$  NMR (75 MHz,  $\text{CDCl}_3$ ) 198.4 (broad), 194.9, 153.4, 144.3, 138.3, 132.0, 125.9, 107.1, 92.7, 85.2, 60.9, 56.1, 18.5; **HRMS**  $m/e$  for  $\text{C}_{21}\text{H}_{16}\text{Co}_2\text{O}_{10}$  [ $\text{M}+\text{H}^+$ ] calculated 546.9485, found 546.9489.

**Hexacarbonyl[ $\mu$ - $\eta^4$  (5-(3,5-dimethoxyphenyl)-2-methylpent-1-en-4-yn-3-one)]dicobalt (Co-Co) (8c):**

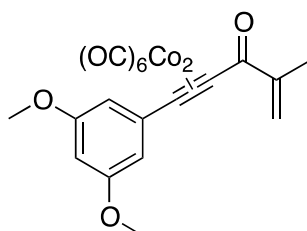

Compound **4c** was prepared according to **General Procedure D**, using compound **7c** as starting material (0.0700 g, 0.304 mmol) with an excess amount of  $\text{Co}_2(\text{CO})_8$ . Compound **4c** was isolated following column chromatography (15:1 petroleum ether :  $\text{Et}_2\text{O}$ ) as a red solid (0.1091 g, 0.212 mmol, 70 % yield), m.p. 64-66 °C; IR  $\nu_{\text{max}}$  3006, 2962, 2924, 2840, 2099, 2008, 1630, 1580  $\text{cm}^{-1}$ ;  $^1\text{H}$  NMR (500 MHz,  $\text{CDCl}_3$ )  $\delta$  6.67 (d,  $J = 2.1$  Hz, 2H), 6.47 (t,  $J = 2.1$  Hz, 1H), 5.88

(s, 1H), 5.82 (s, 1H), 3.80 (s, 6H), 2.07 (s, 3H);  $^{13}\text{C}$  NMR (75 MHz,  $\text{CDCl}_3$ ) 198.4 (broad), 194.9, 161.1, 144.1, 139.0, 126.4, 108.1, 100.6, 92.0, 85.8, 55.5, 18.6; **HRMS**  $m/e$  for  $\text{C}_{20}\text{H}_{14}\text{Co}_2\text{O}_9$   $[\text{M}+\text{H}^+]$  calculated 516.9380, found 516.9380.

**Hexacarbonyl $[\mu\text{-}\eta^4$  (2-methyl-5-(1-methyl-1*H*-indol-2-yl)pent-1-en-4-yn-3-one)]dicobalt (Co-Co) (4d):**

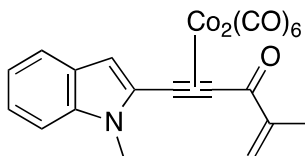

Compound **4d** was prepared according to **General Procedure D**, using compound **7d** (0.1210 g, 0.542 mmol) with an excess amount of  $\text{Co}_2(\text{CO})_8$ . Compound **4d** was isolated following column chromatography (1:1 petroleum ether :  $\text{Et}_2\text{O}$ ) as a dark green solid (0.2590 g, 0.508 mmol, 94 % yield), m.p. 134-137 °C; UV-vis ( $\text{CHCl}_3$ )  $\lambda_{\text{max}} = 598$  nm,  $\epsilon = 1199$   $\text{M}^{-1}\text{cm}^{-1}$ ; IR  $\nu_{\text{max}}$  2934, 2512, 2194, 2142, 2094, 2059, 2019, 1617  $\text{cm}^{-1}$ ;  $^1\text{H}$  NMR (300 MHz,  $\text{CDCl}_3$ )  $\delta$  7.61 (d,  $J = 7.8$  Hz, 1H), 7.27-7.35 (m, 2H), 7.15 (m, 1H), 6.86 (s, 1H), 5.82 (s, 2H), 3.72 (s, 3H), 2.09 (s, 3H);  $^{13}\text{C}$  NMR (75 MHz,  $\text{CDCl}_3$ ) 198.5 (broad), 195.0, 144.4, 139.0, 134.2, 128.0, 126.3, 123.4, 120.9, 120.7, 109.6, 108.0, 78.1, 77.3, 30.7, 18.6; **HRMS**  $m/e$  for  $\text{C}_{21}\text{H}_{13}\text{Co}_2\text{NO}_7$   $[\text{M}+\text{H}^+]$  calculated 509.9434, found 509.9436.

**Hexacarbonyl $[\mu\text{-}\eta^4$  (1-(3,5-dimethoxyphenyl)-4-methylenehex-1-yn-3-one)]dicobalt (Co-Co) (4e):**

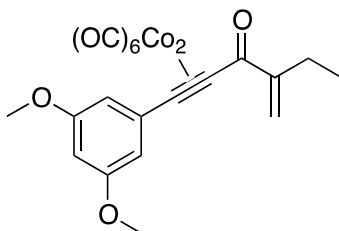

Compound **4e** was prepared according to **General Procedure D**, using compound **7e** as starting material (0.0446 g, 0.183 mmol) and an excess amount of  $\text{Co}_2(\text{CO})_8$ . Compound **4e** was

isolated as a dark red viscous oil (0.0737 g, 0.139 mmol, 76 % yield). IR  $\nu_{\max}$  2966, 2937, 2838, 2096, 2057, 2012, 1635, 1583  $\text{cm}^{-1}$ ;  $^1\text{H}$  NMR (300 MHz,  $\text{CDCl}_3$ )  $\delta$  6.65 (d,  $J = 2.2$  Hz, 2H), 6.46 (t,  $J = 2.2$  Hz, 1H), 5.85 (s, 1H), 5.72 (s, 1H), 3.79 (s, 6H), 2.47 (q,  $J = 7.4$  Hz, 2H), 1.09 (t,  $J = 7.4$  Hz, 3H);  $^{13}\text{C}$  NMR (75 MHz,  $\text{CDCl}_3$ ) 198.3 (broad), 194.9, 161.0, 150.3, 138.9, 123.8, 108.0, 100.5, 92.1, 86.6, 55.4, 24.9, 12.6; **HRMS**  $m/e$  for  $\text{C}_{21}\text{H}_{16}\text{Co}_2\text{O}_9$   $[\text{M}+\text{H}^+]$  calculated 530.9537, found 530.9537.

**Hexacarbonyl[ $\mu$ - $\eta^4$  (2-benzyl-5-(3,5-dimethoxyphenyl)pent-1-en-4-yn-3-one)]dicobalt (Co-Co) (4f):**

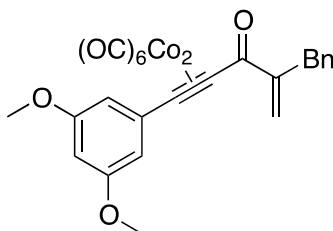

Compound **4f** was prepared according to **General Procedure D**, using compound **7f** as starting material (0.0751 g, 0.245 mmol) and an excess amount of  $\text{Co}_2(\text{CO})_8$ . Compound **4f** was isolated following column chromatography (10:1 petroleum ether :  $\text{Et}_2\text{O}$ ) as a dark red solid (0.1132 g, 0.191 mmol, 78 % yield), m.p. 58-60  $^\circ\text{C}$ ; IR  $\nu_{\max}$  3062, 3021, 2967, 2921, 2840, 2094, 2058, 2037, 2005, 1637, 1623  $\text{cm}^{-1}$ ;  $^1\text{H}$  NMR (300 MHz,  $\text{CDCl}_3$ )  $\delta$  7.25 (m, 5H), 6.62 (d,  $J = 2.2$  Hz, 2H), 6.44 (t,  $J = 2.2$  Hz, 1H), 5.91 (s, 1H), 5.68 (s, 1H), 3.78 (s, 2H), 3.77 (s, 6H);  $^{13}\text{C}$  NMR (75 MHz,  $\text{CDCl}_3$ ) 198.2 (broad), 194.3, 161.1, 148.5, 139.0, 138.6, 129.2, 128.6, 126.5, 125.8, 108.0, 100.7, 92.3, 86.3, 55.5, 38.3; **HRMS**  $m/e$  for  $\text{C}_{26}\text{H}_{18}\text{Co}_2\text{O}_9$   $[\text{M}+\text{H}^+]$  calculated 592.9693, found 592.9694.

**Hexacarbonyl[ $\mu$ - $\eta^4$  (1-(3,5-dimethoxyphenyl)-5-methyl-4-methylenehex-1-yn-3-one)]dicobalt (Co-Co) (4g):**



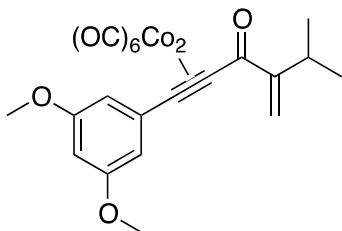

Compound **4g** was prepared according to **General Procedure D**, using compound **7g** as starting material (0.1091 g, 0.422 mmol) and an excess amount of  $\text{Co}_2(\text{CO})_8$ . Compound **4g** was isolated as a dark red viscous oil (0.2036 g, 0.374 mmol, 89 % yield). IR  $\nu_{\text{max}}$  2962, 2096, 2057, 2017, 1585  $\text{cm}^{-1}$ ;  $^1\text{H}$  NMR (500 MHz,  $\text{CDCl}_3$ )  $\delta$  6.67 (d,  $J = 2.4$  Hz, 2H), 6.47 (t,  $J = 2.1$  Hz, 1H), 5.83 (s, 1H), 5.66 (d,  $J = 1.2$  Hz, 1H), 3.80 (s, 6H), 3.09 (septet,  $J = 6.9$  Hz, 1H), 1.11 (d,  $J = 6.9$ , 6H);  $^{13}\text{C}$  NMR (125 MHz,  $\text{CDCl}_3$ ) 198.3 (broad), 195.4, 161.0, 155.3, 138.9, 121.2, 107.9, 100.6, 92.3, 87.6, 55.4, 29.1, 21.4; **HRMS**  $m/e$  for  $\text{C}_{22}\text{H}_{18}\text{Co}_2\text{O}_9$   $[\text{M}+\text{H}^+]$  calculated 544.9693, found 544.9693.

**Hexacarbonyl[ $\mu$ - $\eta^4$  (5-(3,5-dimethoxyphenyl)-2-(triisopropylsilyl)pent-1-en-4-yn-3-one)]dicobalt (Co-Co) (**4h**):**

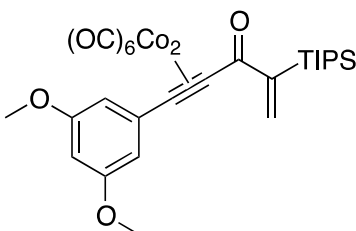

To a solution of alcohol **6h** (0.0823 g, 0.219 mmol) in anhydrous  $\text{CH}_2\text{Cl}_2$  at room temperature was added PDC powder (1.5 equiv, 0.1234 g, 0.328 mmol), and allowed the reaction was stirred for 16 h. After this time, an excess amount of  $\text{Co}_2(\text{CO})_8$  at  $0^\circ\text{C}$  and allowed to stir for 10 h. The mixture was treated following **General Procedure D**. Compound **4h** was isolated following preparative chromatography (25:1 Hexane :  $\text{Et}_2\text{O}$ ) as a dark red solid (0.0833 g, 0.126 mmol, 69 % yield), m.p.  $108\text{-}110^\circ\text{C}$ ; IR  $\nu_{\text{max}}$  2937, 2864, 2092, 2053, 2020, 1621, 1575  $\text{cm}^{-1}$ ;  $^1\text{H}$  NMR (300 MHz,  $\text{CDCl}_3$ )  $\delta$  6.67 (d,  $J = 2.2$  Hz, 2H), 6.53 (d,  $J = 1.6$  Hz, 1H), 6.47 (t,  $J = 2.2$  Hz, 1H), 6.20 (d,  $J = 1.6$  Hz, 1H), 3.79 (s, 6H), 1.38 (septet,  $J = 7.5$  Hz, 3H), 1.10 (d,  $J = 7.5$  Hz,

18H);  $^{13}\text{C}$  NMR (75 MHz,  $\text{CDCl}_3$ ) 199.5, 198.4 (broad), 161.0, 149.4, 139.2, 138.9, 107.7, 100.6, 93.3, 88.0, 55.3, 18.7, 11.2; **HRMS**  $m/e$  for  $\text{C}_{28}\text{H}_{32}\text{Co}_2\text{O}_9\text{Si}$  [ $\text{M}+\text{H}^+$ ] calculated 659.0558, found 659.0549.

**Hexacarbonyl[ $\mu$ - $\eta^4$  (5-(cyclohex-1-en-1-yl)-2-methylpent-1-en-4-yn-3-one)]dicobalt (Co-Co) (4i):**

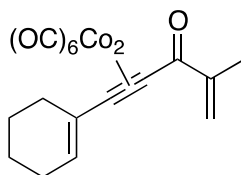

Compound **4i** was prepared according to **General Procedure D**, using compound **7i** as starting material (0.0820 g, 0.470 mmol) and an excess amount of  $\text{Co}_2(\text{CO})_8$ . Compound **4i** was isolated following column chromatography (10:1 petroleum ether :  $\text{Et}_2\text{O}$ ) as a dark red solid (0.1732 g, 0.376 mmol, 80 % yield), m.p. 76-78 °C; IR  $\nu_{\text{max}}$  2931, 2861, 2091, 2003, 1765, 1625, 1579  $\text{cm}^{-1}$ ;  $^1\text{H}$  NMR (300 MHz,  $\text{CDCl}_3$ )  $\delta$  6.23 (m, 1H), 5.88 (s, 1H), 5.84 (m, 1H), 2.26 (m, 2H), 2.16 (m, 2H), 2.02 (dd,  $J = 1.5, 0.9$  Hz, 3H), 1.62-1.80 (m, 4H);  $^{13}\text{C}$  NMR (75 MHz,  $\text{CDCl}_3$ ) 198.7 (broad), 194.8, 144.6, 133.9, 131.7, 125.3, 96.6, 86.5, 30.7, 26.4, 22.9, 21.9, 18.4; **HRMS**  $m/e$  for  $\text{C}_{18}\text{H}_{14}\text{Co}_2\text{O}_7$  [ $\text{M}+\text{H}^+$ ] calculated 460.9482, found 460.9482.

**Hexacarbonyl[ $\mu$ - $\eta^4$  (5-(cyclohex-1-en-1-yl)-2-(triisopropylsilyl)pent-1-en-4-yn-3-one)]dicobalt (Co-Co) (4j):**

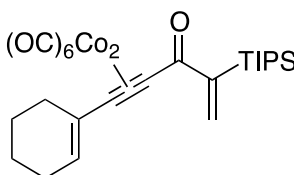

Alcohol **6j** (0.0492 g, 0.154 mmol) was dissolved in anhydrous  $\text{CH}_2\text{Cl}_2$  and (1.5 equiv, 0.0869 g, 0.231 mmol) of PDC was added and allowed to stir overnight, the solution was stirred for overnight. Then an excess amount of  $\text{Co}_2(\text{CO})_8$  was added to this solution. The reaction was stirred while maintaining the temperature at 0 °C. After 2 h, the mixture was treated following

**General Procedure D.** Preparative chromatography (15:1 hexane : Et<sub>2</sub>O) gave **4j** (0.0558 g, 0.093 mmol, 60 % yield) as dark red solid, m.p. 58-60 °C; IR  $\nu_{\max}$  2928, 2865, 2093, 2055, 2019  $\text{cm}^{-1}$ ; <sup>1</sup>H NMR (500 MHz, CDCl<sub>3</sub>)  $\delta$  6.53 (d, J = 1.7 Hz, 1H), 6.20-6.24 (m, 2H), 2.27 (m, 2H), 2.17 (m, 2H), 1.76 (m, 2H), 1.69 (m, 2H), 1.37 (septet, J = 7.5 Hz, 3H), 1.10 (d, J = 7.5 Hz, 18H); <sup>13</sup>C NMR (125 MHz, CDCl<sub>3</sub>) 199.4, 198.9 (broad), 150.1, 137.9, 134.1, 131.3, 97.9, 88.8, 30.8, 26.4, 23.0, 21.9, 18.7, 11.2; **HRMS**  $m/e$  for C<sub>26</sub>H<sub>32</sub>Co<sub>2</sub>O<sub>7</sub>Si [M+H<sup>+</sup>] calculated 603.0660, found 603.0665.

**Synthesis of hexacarbonyl[ $\mu$ - $\eta^4$  ((*E*)-1-(3,5-dimethoxyphenyl)-4-methylhex-4-en-1-yn-3-one)]dicobalt (Co-Co) (**4k**):**

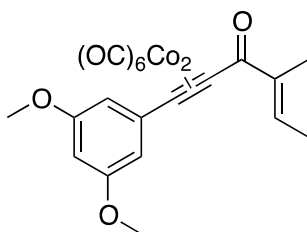

According to **General Procedure B**, alcohol **6k** (0.2051 g, 0.948 mmol) was dissolved in anhydrous CH<sub>2</sub>Cl<sub>2</sub> (30 mL) and (1.5 equiv, 0.5351 g, 1.422 mmol) of PDC was added. Afterward, the crude material was dissolved in anhydrous CH<sub>2</sub>Cl<sub>2</sub> (20 mL) and an excess amount of Co<sub>2</sub>(CO)<sub>8</sub> was added to this solution following **General Procedure D**. The reaction was stirred while maintaining the temperature at 0 °C. After 2 h, the mixture was concentrated under reduced pressure in a cold water bath, obtaining a dark red material. This crude material was purified first on a plug of silica, first washing with 100% petroleum ether to remove the remaining Co<sub>2</sub>(CO)<sub>8</sub>, followed by a second washing with 100% Et<sub>2</sub>O to obtain the product complexes. Column chromatography (1:1 petroleum ether : Et<sub>2</sub>O) gave **4k** (0.1421 g, 0.674 mmol, 48 % yield) as a dark red viscous oil. IR  $\nu_{\max}$  3005, 2938, 2838, 2095, 2054, 2009, 1625, 1583  $\text{cm}^{-1}$ ; <sup>1</sup>H NMR (300 MHz, CDCl<sub>3</sub>)  $\delta$  6.75 (qd, J = 7.0, 1.2 Hz, 1H), 6.67 (d, J = 2.2 Hz, 2H), 6.47 (t, J = 2.2 Hz, 1H), 3.80 (s, 6H), 1.97 (s, 3H), 1.77 (d, J=6.9 Hz, 3H); NOESY-2D NMR (300 MHz, CDCl<sub>3</sub>): an off diagonal cross peak correlating the  $\delta$  1.77 and  $\delta$  1.97

resonances;  $^{13}\text{C}$  NMR (75 MHz,  $\text{CDCl}_3$ ) 198.4 (broad), 194.4, 161.0, 139.7, 139.1, 137.5, 108.0, 100.6, 91.8, 86.6, 55.4, 14.5, 12.0; **HRMS**  $m/e$  for  $\text{C}_{21}\text{H}_{16}\text{Co}_2\text{O}_9$  [ $\text{M}^+$ ] calculated 530.9537, found 530.9531.

**Hexacarbonyl[ $\mu$ - $\eta^4$ -(2-methoxy-6-methyl-5,6-dihydro-8,9-dehydro-5*H*-benzo[7]annulen-7(6*H*)-one)]dicobalt (Co-Co) (**9a**) *para*-:**

**Hexacarbonyl[ $\mu$ - $\eta^4$ -(1-methoxy-8-methyl-8,9-dihydro-5,6-dehydro-5*H*-benzo[7]annulen-7(6*H*)-one)]dicobalt (Co-Co) (**9a'**) *ortho*-:**

**General procedure E:** In a round bottom flask, the complexed dienynone, **4a** (0.1120 g, 0.230 mmol) was dissolved in anhydrous  $\text{CH}_2\text{Cl}_2$  (10 mL) under  $\text{N}_2$ . Later, a 1.0 M solution of tin tetrachloride ( $\text{SnCl}_4$ ) in  $\text{CH}_2\text{Cl}_2$  (3 equiv, 0.70 mL, 0.70 mmol), was added dropwise to the reaction mixture at 0 °C. The reaction mixture was monitored under TLC (20:1 petroleum ether :  $\text{Et}_2\text{O}$ ) and was allowed to warm to room temperature. After complete disappearance of the starting material (24 h), the solution was treated with  $\text{NH}_4\text{Cl}$  (aq., sat.) and extracted with  $\text{Et}_2\text{O}$  (3 x 100 mL). the combined ether layers were with  $\text{MgSO}_4$ , filtered, and the solvent removed under reduced pressure. This crude material was subjected column chromatography (20:1 petroleum ether :  $\text{Et}_2\text{O}$ ) to obtain major and minor products, *para*- **9a** (**major**) (elute first) and *ortho*- **9a'** (**minor**), each as a red-maroon solid.

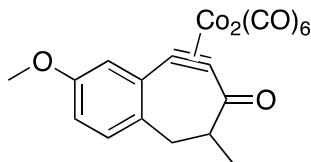

**Para- 9a** (0.0589 g, 0.121 mmol, 53 % yield), m.p. 68-71 °C; IR  $\nu_{\text{max}}$  2926, 2201, 2099, 2062, 2016, 1675, 1606  $\text{cm}^{-1}$ ;  $^1\text{H}$  NMR (300 MHz,  $\text{CDCl}_3$ )  $\delta$  7.27 (obscured d,  $J = 2.7$  Hz, 1H), 7.11 (d,  $J = 8.4$  Hz, 1H), 6.87 (dd,  $J = 8.4, 2.7$  Hz, 1H), 3.86 (s, 3H), 2.73-2.95 (m, 3H), 1.25 (d,  $J = 6.3$  Hz, 3H);  $^{13}\text{C}$  NMR (75 MHz,  $\text{CDCl}_3$ ) 204.6, 198.0 (broad), 159.4, 136.8, 131.5, 131.4, 118.1, 114.4, 86.9, 78.2, 55.3, 45.8, 38.3, 16.3; **HRMS**  $m/e$  for  $\text{C}_{19}\text{H}_{12}\text{Co}_2\text{O}_8$  [ $\text{M}+\text{H}^+$ ] calculated 486.9274, found 486.9260.

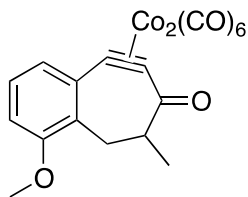

**Ortho- 9a'** (0.0268 g, 0.055 mmol, 24 % yield), m.p. 64-68 °C; IR  $\nu_{\max}$  2960, 2921, 2852, 2098, 2061, 2007, 1677, 1565  $\text{cm}^{-1}$ ; <sup>1</sup>H NMR (500 MHz, CDCl<sub>3</sub>)  $\delta$  7.37 (d, J = 7.3 Hz, 1H), 7.31 (apparent t, J = 7.9 Hz, 1H), 6.93 (d, J = 8.1 Hz, 1H), 3.87 (s, 3H), 3.30 (d, J = 16.1 Hz, 1H), 2.83 (m, 1H), 2.72 (dd, J = 16.0, 10.1 Hz, 2H), 1.27 (d, J = 7.0 Hz, 3H); <sup>13</sup>C NMR (125 MHz, CDCl<sub>3</sub>) 205.1 (broad), 198.3, 156.8, 137.2, 128.3, 127.7, 125.4, 111.2, 87.6, 78.0, 55.9, 45.5, 28.4, 16.3; **HRMS**  $m/e$  for C<sub>19</sub>H<sub>12</sub>Co<sub>2</sub>O<sub>8</sub> [M+H<sup>+</sup>] calculated 486.9274, found 486.9277.

**Hexacarbonyl[ $\mu$ - $\eta^4$ -(1,2,3-trimethoxy-8-methyl-8,9-dihydro-5,6-dehydro-5H-benzo[7]annulen-7(6H)-one)]dicobalt (Co-Co) (9b):**

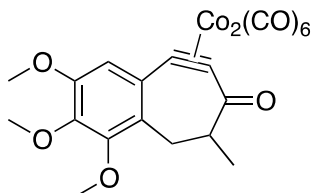

Compound **9b** was prepared according to **General Procedure E**, using compound **4b** as starting material (0.0651 g, 0.119 mmol). After stirring 12 h, compound **9b** was isolated following column chromatography (1:1 petroleum ether : Et<sub>2</sub>O) as a red solid (0.0454 g, 0.083 mmol, 70 % yield), m.p. 77-80 °C; IR  $\nu_{\max}$  2968, 2936, 2096, 2057, 2010, 1680, 1578, 1557  $\text{cm}^{-1}$ ; <sup>1</sup>H NMR (300 MHz, CDCl<sub>3</sub>)  $\delta$  7.05 (s, 1H), 3.94 (s, 3H), 3.91 (s, 3H), 3.90 (s, 3H), 3.13 (d, J = 15.9 Hz, 1H), 2.82 (m, 1H), 2.69 (dd, J = 15.9, 9.9 Hz, 2H), 1.27 (d, J = 6.9 Hz, 3H); <sup>13</sup>C NMR (75 MHz, CDCl<sub>3</sub>) 204.9, 198.4 (broad), 153.0, 151.6, 143.4, 131.4, 126.1, 111.9, 88.0, 78.2, 61.5, 61.0, 56.0, 45.8, 29.1, 16.5; **HRMS**  $m/e$  for C<sub>21</sub>H<sub>16</sub>Co<sub>2</sub>O<sub>10</sub> [M+H<sup>+</sup>] calculated 546.9485, found 546.9495.

**Hexacarbonyl[ $\mu$ - $\eta^4$ -(2,4-dimethoxy-6-methyl-5,6-dihydro-8,9-dehydro-5H-benzo[7]annulen-7(6H)-one)]dicobalt (Co-Co) (9c):**

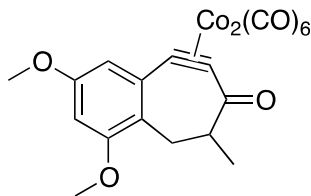

Compound **9c** was prepared according to **General Procedure E**, using compound **4c** as starting material (0.0671 g, 0.130 mmol). After 24 h, compound **9c** was isolated following column chromatography (20:1 petroleum ether : Et<sub>2</sub>O) as a red solid (0.0374 g, 0.072 mmol, 56 % yield), m.p. 67-70 °C; IR  $\nu_{\text{max}}$  3003, 2924, 2850, 2097, 2025, 2004, 1727, 1677, 1605, 1567  $\text{cm}^{-1}$ ; <sup>1</sup>H NMR (500 MHz, CDCl<sub>3</sub>)  $\delta$  6.88 (s, 1H), 6.52 (s, 1H), 3.87 (s, 3H), 3.85 (s, 3H), 3.21 (d, J = 15.9 Hz, 1H), 2.80 (m, 1H), 2.64 (dd, J = 15.9, 10.0 Hz, 1H), 1.26 (d, J = 7.0 Hz, 3H); <sup>13</sup>C NMR (75 MHz, CDCl<sub>3</sub>) 205.2, 198.1 (broad), 159.7, 157.9, 137.6, 120.4, 108.7, 99.4, 88.1, 78.0, 55.9, 55.3, 45.7, 28.1, 16.3; **HRMS** *m/e* for C<sub>20</sub>H<sub>14</sub>Co<sub>2</sub>O<sub>9</sub> [M+H<sup>+</sup>] calculated 516.9380, found 516.9373.

**Hexacarbonyl[ $\mu$ - $\eta^4$ -(5,9-dimethyl-9,10-dihydro-6,7-dehydrocyclohepta[b]indole-8(5H)-one)]dicobalt (Co-Co) (9d):**

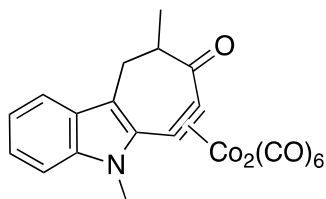

Compound **9d** was prepared according to **General Procedure E**, using compound **4d** (0.0789 g, 0.155 mmol). After 48 h, compound **9d** was isolated following column chromatography (20:1 petroleum ether : Et<sub>2</sub>O) as a dark green solid (0.0513 g, 0.101 mmol, 65 % yield), m.p. >150 °C (dec); IR  $\nu_{\text{max}}$  2924, 2859, 2094, 2046, 2009, 1664  $\text{cm}^{-1}$ ; <sup>1</sup>H NMR (500 MHz, CDCl<sub>3</sub>)  $\delta$  7.59 (d, J = 8.0 Hz, 1H), 7.30-7.29 (m, 2H), 7.15 (apparent dt, J = 1.1, 7.4 Hz, 1H), 3.94 (s, 3H), 3.16 (dd, J=16.5, 2.1 Hz, 1H), 3.04 (m, 1H), 2.81 (dd, J = 16.5, 11.1 Hz, 1H),

1.39 (d,  $J = 6.8$  Hz, 3H);  $^{13}\text{C}$  NMR (125 MHz,  $\text{CDCl}_3$ ) 204.8, 198.0 (broad), 138.8, 132.6, 126.6, 123.6, 120.1, 119.2, 115.3, 109.5, 86.5, 72.4, 43.9, 29.9, 29.5, 16.4; **HRMS**  $m/e$  for  $\text{C}_{21}\text{H}_{13}\text{Co}_2\text{NO}_7$  [ $\text{M}+\text{H}^+$ ] calculated 509.9434, found 509.9428.

**Hexacarbonyl[ $\mu$ - $\eta^4$ -(6-ethyl-2,4-dimethoxy-5,6-dihydro-8,9-dehydro-5*H*-benzo[7]annulen-7(6*H*)-one)]dicobalt (Co-Co) (**9e**):**

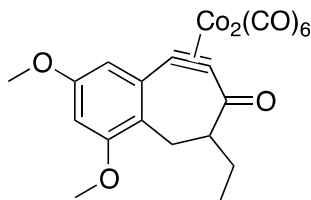

Compound **9e** was prepared according to **General Procedure E**, using compound **4e** as starting material (0.1035 g, 0.195 mmol). After 12 h, compound **9e** was isolated following column chromatography (10:1 petroleum ether :  $\text{Et}_2\text{O}$ ) as a dark red solid (0.0775 g, 0.146 mmol, 75 % yield), m.p. 87-90 °C; IR  $\nu_{\text{max}}$  2963, 2938, 2877, 2840, 2096, 2056, 2011, 1674, 1601  $\text{cm}^{-1}$ ;  $^1\text{H}$  NMR (300 MHz,  $\text{CDCl}_3$ )  $\delta$  6.87 (d,  $J = 2.4$  Hz, 1H), 6.52 (d,  $J = 2.4$  Hz, 1H), 3.87 (s, 3H), 3.85 (s, 3H), 3.03 (dd,  $J = 16.2, 1.7$  Hz), 2.93 (dd,  $J = 16.2, 13.7$  Hz, 1H), 2.63 (m, 1H), 1.74 (m, 1H), 1.42 (m, 1H), 0.97 (t,  $J = 7.3$  Hz, 3H);  $^{13}\text{C}$  NMR (75 MHz,  $\text{CDCl}_3$ ) 205.4, 198.3 (broad), 159.8, 158.1, 138.0, 119.8, 108.7, 99.4, 87.5, 77.9, 56.0, 55.4, 53.2, 25.2, 23.5, 11.8; **HRMS**  $m/e$  for  $\text{C}_{21}\text{H}_{16}\text{Co}_2\text{O}_9$  [ $\text{M}+\text{H}^+$ ] calculated 530.9537, found 530.9540.

**Hexacarbonyl[ $\mu$ - $\eta^4$ -(6-benzyl-2,4-dimethoxy-5,6-dihydro-8,9-dehydro-5*H*-benzo[7]annulen-7(6*H*)-one)]dicobalt (Co-Co) (**9f**):**

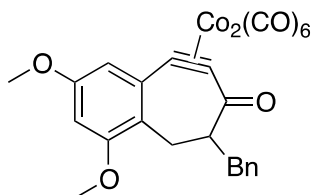

Compound **9f** was prepared according to **General Procedure E**, using compound **4f** as starting material (0.0481 g, 0.081 mmol). After 20 h, compound **9f** was isolated following

column chromatography (5:1 petroleum ether : Et<sub>2</sub>O) as a dark red solid (0.0351 g, 0.059 mmol, 73 % yield), m.p. 63-66 °C; IR  $\nu_{\text{max}}$  2922, 2850, 2097, 2058, 2017, 1728, 1680, 1600 cm<sup>-1</sup>; <sup>1</sup>H NMR (300 MHz, CDCl<sub>3</sub>)  $\delta$  7.13-7.32 (m, 5H), 6.87 (d, J = 2.4 Hz, 1H), 6.44 (d, J = 2.4 Hz, 1H), 3.85 (s, 3H), 3.59 (s, 3H), 3.20-3.33 (m, 2H), 3.00 (m, 1H), 2.52-2.72 (m, 2H); <sup>13</sup>C NMR (75 MHz, CDCl<sub>3</sub>) 204.2, 198.1 (broad), 159.7, 157.8, 139.3, 137.7, 129.1, 128.1, 126.0, 120.2, 108.5, 99.4, 87.8, 78.0, 55.7, 55.2, 52.7, 36.0, 24.9; **HRMS** *m/e* for C<sub>26</sub>H<sub>18</sub>Co<sub>2</sub>O<sub>9</sub> [M+H<sup>+</sup>] calculated 592.9693, found 592.9695.

**Hexacarbonyl[ $\mu$ - $\eta^4$ -(6-isopropyl-2,4-dimethoxy-5,6-dihydro-8,9-dehydro-5H-benzo[7]annulen-7(6H)-one)]dicobalt (Co-Co) (9g):**

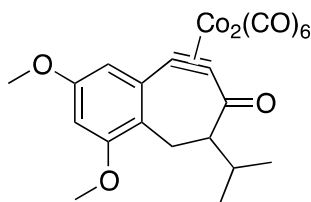

Compound **9g** was prepared according to **General Procedure E**, using compound **4g** as starting material (0.1142 g, 0.209 mmol). After 4 h at 0 °C, compound **9g** was isolated following column chromatography (10:1 petroleum ether : Et<sub>2</sub>O) as a dark red solid (0.0978 g, 0.179 mmol, 86 % yield), m.p. 85-88 °C; IR  $\nu_{\text{max}}$  2960, 2871, 2838, 2095, 2056, 2011, 1672 cm<sup>-1</sup>; <sup>1</sup>H NMR (500 MHz, CDCl<sub>3</sub>)  $\delta$  6.86 (d, J = 2.4 Hz, 1H), 6.53 (d, J = 2.4 Hz, 1H), 3.87 (s, 3H), 3.86 (s, 3H), 3.18 (dd, J = 16.2, 7.8 Hz, 1H), 2.81 (d, J = 16.2 Hz, 1H), 2.48 (apparent t, J = 8.2 Hz, 1H), 1.80 (m, 1H), 0.94 (d, J = 6.8 Hz, 3H), 0.92 (d, J = 6.6 Hz, 3H); <sup>13</sup>C NMR (125 MHz, CDCl<sub>3</sub>) 204.9, 198.3 (broad), 159.7, 158.1, 138.1, 119.2, 108.6, 99.4, 87.0, 77.7, 58.7, 55.9, 55.3, 27.5, 22.8, 20.8, 19.6; **HRMS** *m/e* for C<sub>22</sub>H<sub>18</sub>Co<sub>2</sub>O<sub>9</sub> [M+H<sup>+</sup>] calculated 544.9693, found 544.9694.

**Hexacarbonyl[ $\mu$ - $\eta^4$ -(6-(triisopropylsilyl)-2,4-dimethoxy-5,6-dihydro-8,9-dehydro-5H-benzo[7]annulen-7(6H)-one)]dicobalt (Co-Co) (9h):**



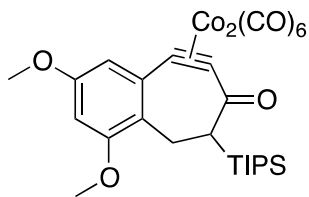

Compound **9h** was prepared according to **General Procedure E**, using compound **4h** as starting material (0.0710 g, 0.108 mmol). After 5 minutes at 0 °C, the product **9h** was isolated following column chromatography (40:1 petroleum ether : Et<sub>2</sub>O) as a dark red solid (0.0639 g, 0.0970 mmol, 90 % yield), m.p. 112-114 °C; IR  $\nu_{\text{max}}$  2942, 2866, 2096, 2057, 2016, 1673, 1600  $\text{cm}^{-1}$ ; <sup>1</sup>H NMR (500 MHz, CDCl<sub>3</sub>)  $\delta$  6.87 (d, *J* = 2.4, 1H), 6.51 (d, *J* = 2.4 Hz, 1H), 3.87 (s, 3H), 3.84 (s, 3H), 3.72 (d, *J* = 15.0 Hz, 1H), 2.49 (1/2 AB, *J* = 11.5 Hz, 1H), 2.40 (d of 1/2 AB, *J* = 15.0, 11.5 Hz, 1H), 1.44 (apparent septet, *J* = 7.5 Hz, 3H), 1.14 (d, *J* = 7.5 Hz, 9H), 1.13 (d, *J* = 7.5 Hz, 9H); <sup>13</sup>C NMR (125 MHz, CDCl<sub>3</sub>) 205.4, 198.4 (broad), 159.6, 157.2, 138.1, 122.5, 108.5, 99.0, 87.9, 83.4, 55.6, 55.3, 40.7, 22.5, 19.2, 19.1, 11.7; **HRMS** *m/e* for C<sub>28</sub>H<sub>32</sub>Co<sub>2</sub>O<sub>9</sub>Si [M+H<sup>+</sup>] calculated 659.0558, found 659.0562.

Compound **9h** was prepared according to **General Procedure E**, using compound **4h** as starting material (0.0831 g, 0.126 mmol), except that 50 mol% SnCl<sub>4</sub> (0.007 mL, 0.06 mmol) was added. After 30 minutes at 0 °C, the product was isolated following column chromatography (40:1 petroleum ether : Et<sub>2</sub>O) as a dark red solid (0.0736 g, 0.112 mmol, 89 % yield).

To a solution of compound **4h** (0.0690 g, 0.105 mmol) in CH<sub>2</sub>Cl<sub>2</sub> at 0 °C was added SnCl<sub>4</sub> (10  $\mu\text{L}$  of a 1.0 M solution, 10 mol%). The ice bath was removed after 1 h and the solution allowed to stir for 12 h. The solution was re-cooled 0 °C and SnCl<sub>4</sub> (10  $\mu\text{L}$  of a 1.0 M solution, 10 mol%) was added. The ice bath was removed and the solution allowed to stir for 8 h. To except that 50 mol% SnCl<sub>4</sub> (0.007 mL, 0.06 mmol) was added. After addition of NH<sub>4</sub>Cl (aq) and a conventional extractive workup, flash chromatography (40:1 petroleum ether : Et<sub>2</sub>O) afforded 0.0625 g of a 73.5:26.5 mixture of **9h** (67% yield, 88% yield based on recovered starting material) and starting **4h** (24% recovery).

**Hexacarbonyl[ $\mu$ - $\eta^4$ -(6-methyl-3,4,5,6-tetrahydro-8,9-dehydro-1*H*-benzo[7]annulen-7(2*H*)-one)]dicobalt (Co-Co) (**9i**, **9i'**):**

Compound **9i** and **9i'** were prepared according to **General Procedure E**, using **4i** as starting material (0.1004 g, 0.218 mmol). After 12 h, the product was isolated following column chromatography (50:1 hexane : Et<sub>2</sub>O) as dark red viscous oil (0.0442 g, 0.0958 mmol) 44 % yield as a 66:34 ratio of **9i** (29%) and **9i'** (15%). Subsequent preparative TLC (50:1 hexanes : Et<sub>2</sub>O) afforded the separated isomers, with **9i'** eluting first.

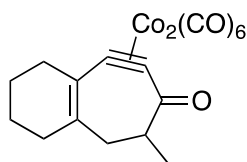

**9i**: dark red viscous oil. IR  $\nu_{\max}$  2924, 2094, 2035, 2014, 1679  $\text{cm}^{-1}$ ; <sup>1</sup>H NMR (500 MHz, CDCl<sub>3</sub>)  $\delta$  2.78 (m, 1H), 2.30-2.45 (m, 3H), 2.19 (m, 1H), 1.96-2.14 (m, 2H), 1.60-1.81 (m, 4H), 1.20 (d,  $J = 6.9$  Hz, 3H); <sup>13</sup>C NMR (125 MHz, CDCl<sub>3</sub>) 204.6, 198.6 (broad), 140.5, 128.8, 91.7, 78.0, 44.0, 39.9, 33.9, 29.8, 22.9, 22.6, 16.1; **HRMS**  $m/e$  for C<sub>18</sub>H<sub>14</sub>Co<sub>2</sub>O<sub>7</sub> [ $M^+ + H^+$ ] calculated 460.9482, found 460.9482.

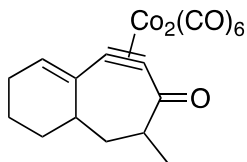

**9i'**: dark red viscous oil. IR  $\nu_{\max}$  2956, 2922, 2854, 2094, 2057, 2024, 1726  $\text{cm}^{-1}$ ; <sup>1</sup>H NMR (500 MHz, CDCl<sub>3</sub>)  $\delta$  6.44 ((br s), 1H), 2.88 (m, 1H), 2.63 (m, 1H), 2.09-2.21 (m, 2H), 1.96 (m, 1H), 1.83 (m, 1H), 1.54-1.70 (m, 3H), 1.40 (m, 1H), 1.23 (d,  $J = 6.8$  Hz, 3H); <sup>13</sup>C NMR (125 MHz, CDCl<sub>3</sub>) 204.3, 198.7 (broad), 143.8, 137.8, 136.7, 91.8, 82.0, 48.5, 42.2, 41.0, 32.4, 26.9, 21.8, 17.5; **HRMS**  $m/e$  for C<sub>18</sub>H<sub>14</sub>Co<sub>2</sub>O<sub>7</sub> [ $M^+ + H^+$ ] calculated 460.9482, found 460.9480.

**Hexacarbonyl[ $\mu$ - $\eta^4$ -(6-(triisopropylsilyl)-3,4,5,6-tetrahydro-8,9-dehydro-1*H*-benzo[7]annulen-7(2*H*)-one)]dicobalt (Co-Co) (**9j**, **9j'**):**

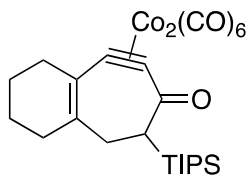

Compound **9j** + **j'** were prepared according to **General Procedure E**, using **4j** as starting material (0.0438 g, 0.0727 mmol). After 7 h at 0 °C, the product was isolated following column chromatography (50:1 hexane : Et<sub>2</sub>O) as dark red viscous oil (0.0366 g, 84 % yield, as a 78:22 mixture of **9j**:**9j'**). IR  $\nu_{\max}$  2940, 2891, 2864, 2094, 2050, 2008 cm<sup>-1</sup>; **9j** <sup>1</sup>H NMR (500 MHz, CDCl<sub>3</sub>)  $\delta$  2.50 (d, J = 11.7 Hz, 1H), 2.31 (d, J = 16.2 Hz, 1H), 2.27-2.54 (m, 3H), 2.08-2.27 (m, 2H), 1.77 (m, 2H), 1.72 (m, 4H), 1.33 (septet, J = 6.9 Hz, 3H), 1.10 (d, J = 6.9 Hz, 18H); peaks from minor isomer **9j'** could be observed at 6.46 (m, 1H), 2.72 (d, J = 10.7 Hz, 1H), 1.95 (m, 1H), 1.91 (d, J = 15.3 Hz, 1H), 1.84 (m, 1H), 1.60 (m, 1H), 1.11 (d, obscured, 18H); <sup>13</sup>C NMR (125 MHz, CDCl<sub>3</sub>) 204.8, 198.8 (broad), 143.0, 129.3, 91.7, 82.3, 38.2, 33.8, 33.6, 29.8, 22.9, 22.6, 19.3, 11.5; peaks from the minor isomer could be observed at 204.9, 138.4, 136.7, 44.1, 43.7, 34.1, 32.4, 26.9, 21.9; **HRMS** *m/e* for C<sub>26</sub>H<sub>32</sub>Co<sub>2</sub>O<sub>7</sub>Si [M<sup>+</sup>+H<sup>+</sup>] calculated 603.0660, found 603.0653.

***cis*-Hexacarbonyl[ $\mu$ - $\eta^4$ -(2,4-dimethoxy-5,6-dimethyl-5,6-dihydro-8,9-dehydro-5*H*-benzo[7]annulen-7(6*H*)-one)]dicobalt (Co-Co) (**9k**):**

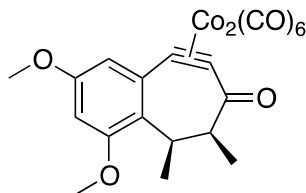

Compound **9k** was prepared according to **General Procedure E**, using *E*-**4k** as starting material (0.2425 g, 0.457 mmol). After 48 h, preparative (7:1 petroleum ether : Et<sub>2</sub>O) resulted in the isolation an 89:11 mixture of **9k** and **4k** (0.0850 g, 31% **9k**, 4% recovered **4k**), followed by **7k** (0.0305 g, 27% yield). Repeated preparative TLC (7:1 petroleum ether : Et<sub>2</sub>O) of the first fraction resulted in the isolation of **9k** uncontaminated by **4k** as dark red viscous oil. **9k**: IR  $\nu_{\max}$

= 2923, 2853, 2201, 2095, 2060, 2030  $\text{cm}^{-1}$ ;  $^1\text{H}$  NMR (500 MHz,  $\text{CDCl}_3$ )  $\delta$  = 6.91 (d,  $J=2.4$ , 1H), 6.51 (d,  $J=2.4$ , 1H), 3.86 (s, 3H), 3.85 (s, 3H), 3.60 (qd,  $J = 7.4, 1.8$  Hz, 1H), 3.13 (qd,  $J = 6.9, 1.8$  Hz, 1H), 1.32 (d,  $J = 6.9$  Hz, 3H), 0.94 (d,  $J = 7.4$  Hz, 3H);  $^{13}\text{C}$  NMR (125 MHz,  $\text{CDCl}_3$ ) 203.1, 198.4 (broad), 159.3, 157.2, 135.4, 126.5, 109.3, 99.7, 89.9, 80.1, 55.8, 55.2, 48.1, 34.4, 18.2, 15.0, 14.4; **HRMS**  $m/e$  for  $\text{C}_{21}\text{H}_{16}\text{Co}_2\text{O}_9$  [ $\text{M}^+$ ] calculated 530.9537, found 530.9539.

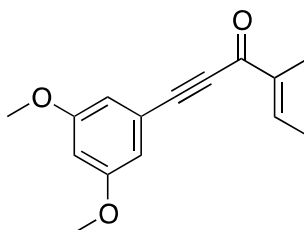

**7k:** IR  $\nu_{\text{max}}$  = 2926, 2844, 2199, 1623, 1591  $\text{cm}^{-1}$ ;  $^1\text{H}$  NMR (500 MHz,  $\text{CDCl}_3$ )  $\delta$  = 7.33 (q,  $J = 6.9$  Hz, 1H), 6.73 (d,  $J = 2.0$  Hz, 2H), 6.54 (t,  $J = 2.0$  Hz, 1H), 3.80 (s, 6H), 1.99 (d,  $J = 6.9$  Hz, 3H), 1.86 (s, 3H); NOESY-2D NMR (500 MHz,  $\text{CDCl}_3$ ): an off diagonal cross peak correlating the  $\delta$  1.86 and  $\delta$  1.99 resonances;  $^{13}\text{C}$  NMR (125 MHz,  $\text{CDCl}_3$ ) 180.1, 160.6, 145.3, 139.5, 121.7, 110.3, 103.6, 90.8, 85.4, 55.5, 15.2, 10.2; **HRMS**  $m/e$  for  $\text{C}_{15}\text{H}_{16}\text{O}_3$  [ $\text{M}^+\text{H}^+$ ] calculated 245.1178, found 245.1179.

### 6-Isopropyl-2,4-dimethoxy-8-(triethylsilyl)-5H-benzo[7]annulen-7(6H)-one (10)

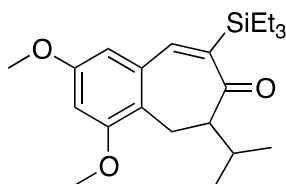

Compound **9g** (0.1019 g, 0.187 mmol) was dissolved in degassed 1,2-dichloroethane (3 mL). To this stirred solution, bis(trimethylsilyl)acetylene (0.088 mL, 0.374 mmol) and triethylsilane (0.14 mL, 0.898 mmol) were added. The reaction was placed in an oil bath set at 65 °C for 4 h under  $\text{N}_2$ . After this time, the mixture was allowed to cool down, dissolved in  $\text{Et}_2\text{O}$  (60 mL) and extracted with  $\text{H}_2\text{O}$  (3 X 60 mL). The organic layer was dried over  $\text{MgSO}_4$ , filtered and the solvent removed under reduced pressure. Preparative TLC (5:1 petroleum ether :  $\text{Et}_2\text{O}$ )

provided compound **10** as a yellow liquid (0.0609 g, 0.163 mmol, 87%). IR  $\nu_{\max}$  = 2953, 2875, 2841, 2250, 1641, 1595, 1565  $\text{cm}^{-1}$ ;  $^1\text{H}$  NMR (500 MHz,  $\text{CDCl}_3$ )  $\delta$  = 7.08 (s, 1H), 6.49 (d, J = 2.4 Hz, 1H), 6.44 (d, J = 2.4 Hz, 1H), 3.84 (s, 3H), 3.83 (s, 3H), 3.03 (dd, J = 15.1, 2.4 Hz, 1H), 2.90 (dd, J = 15.1, 10.0 Hz, 1H), 2.30 (m, 1H), 2.07 (m, 1H), 0.98 (t, J = 7.9 Hz, 9H), 0.94 (d, J = 6.8 Hz, 3H), 0.85 (d, J = 6.7 Hz, 3H), 0.70-0.83 (m, 6H); NOESY-2D NMR (300 MHz,  $\text{CDCl}_3$ ): an off diagonal cross peak correlating the  $\delta$  6.44 and  $\delta$  7.08 resonances;  $^{13}\text{C}$  NMR (125 MHz,  $\text{CDCl}_3$ ) 208.6, 158.6, 157.7, 147.5, 142.4, 137.9, 121.0, 107.1, 99.8, 60.8, 55.9, 55.3, 28.5, 21.6, 21.1, 19.1, 7.5, 3.5; **HRMS**  $m/e$  for  $\text{C}_{22}\text{H}_{34}\text{O}_3\text{Si}$  [ $\text{M}+\text{H}^+$ ] calculated 375.2355, found 375.2373.

---

## References

1. W. C. Still, M. Kahn and A. Mitra, *J. Org. Chem.* 1978, **43**, 2923.
2. Z.-Y. Li, M. Wang, Q.-H. Bian, B. Zheng, J.-Y. Mao, S.-N. Li, S.-Z. Liu, M. A. Wang, J.-C. Zhong, and H.-C. Guo, *Chem-Eur. J.* 2011, **17**, 5782.

jrg.1447 4, 3-MeOPh-CC-H + BuLi/methacroein, 7/7/21

7.223  
7.197  
6.989  
6.985  
6.981  
6.977  
6.910  
6.907  
6.902  
6.899  
6.882  
6.880  
6.874  
6.871

5.260  
5.027  
4.992  
4.990

3.802

2.186  
1.942

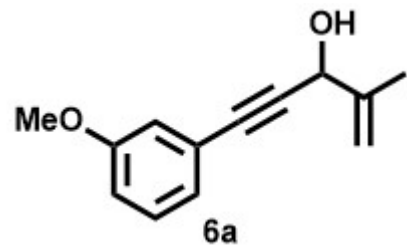

300 MHz, CDCl<sub>3</sub>

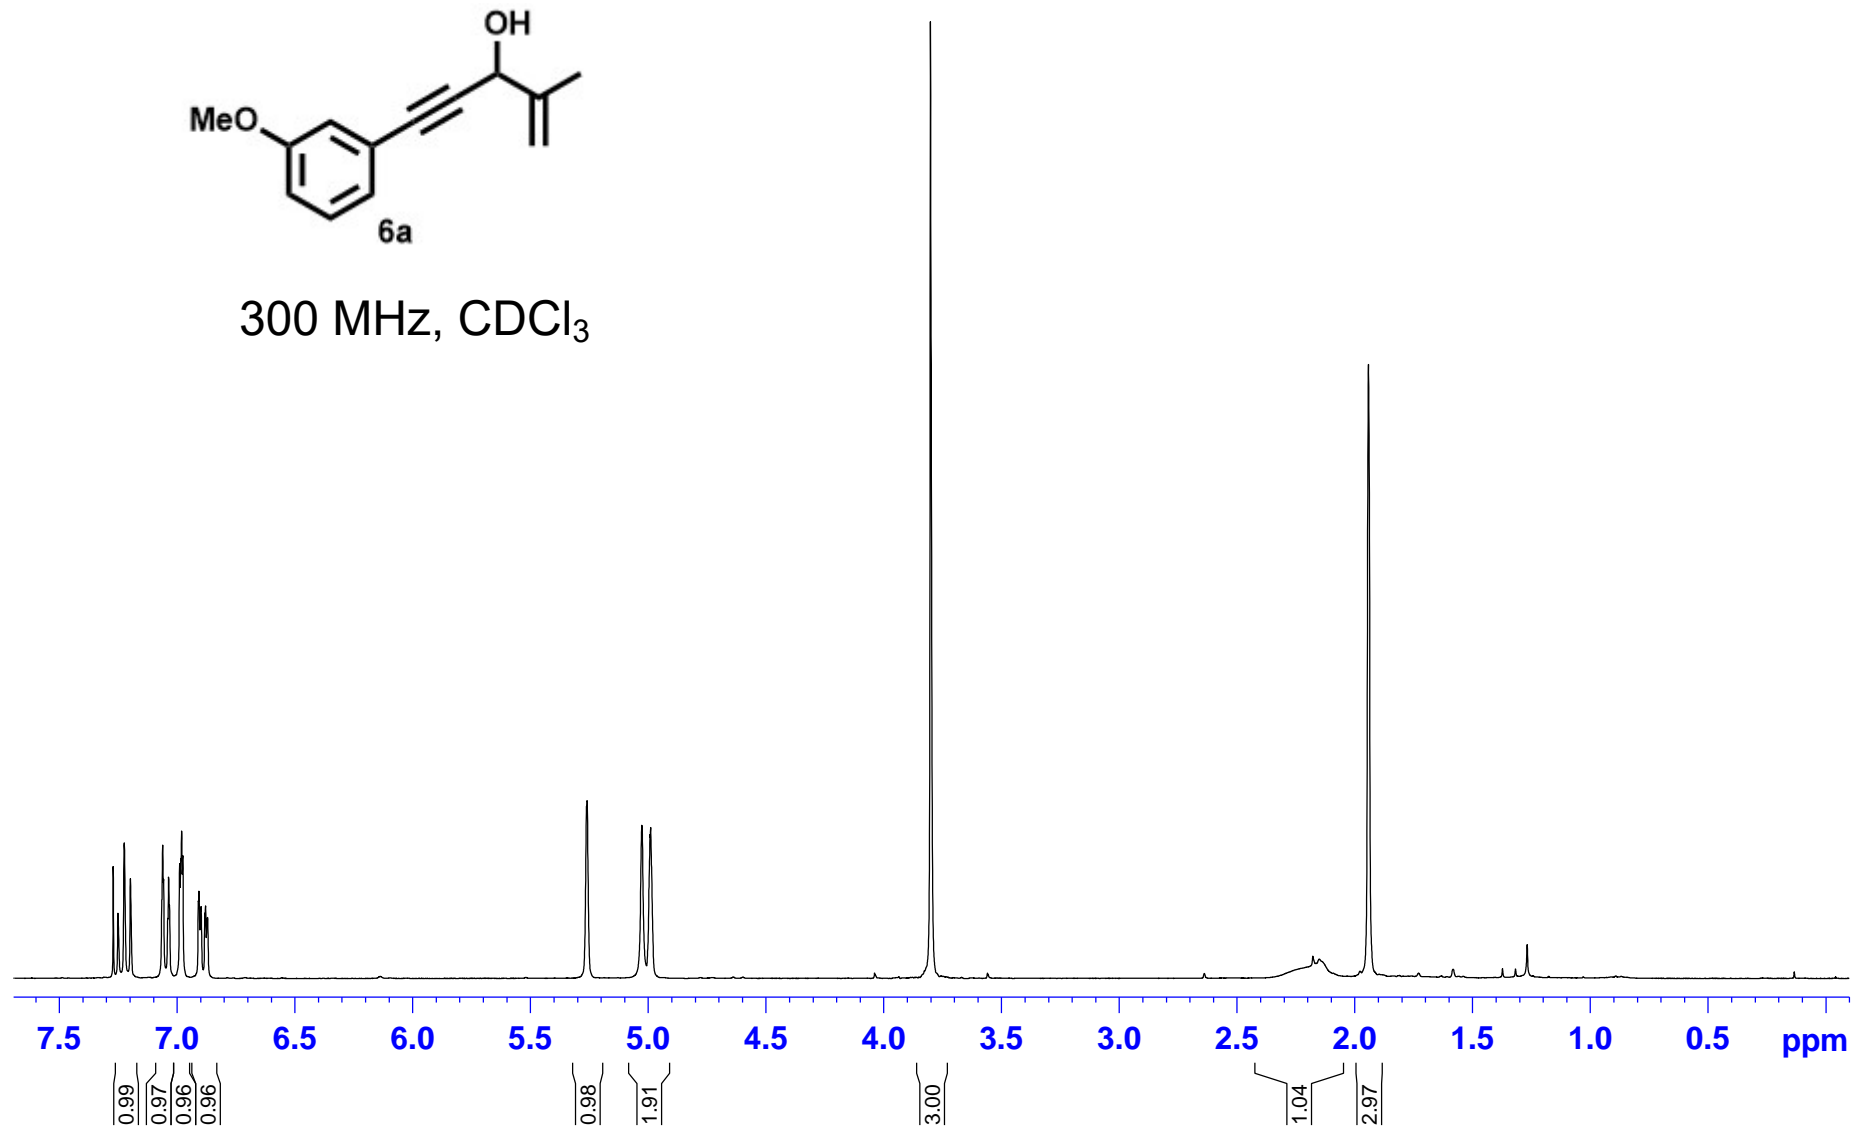

jrg.1447 5 13C 3-MeOPh-CC-methacol OH, 7/8/21

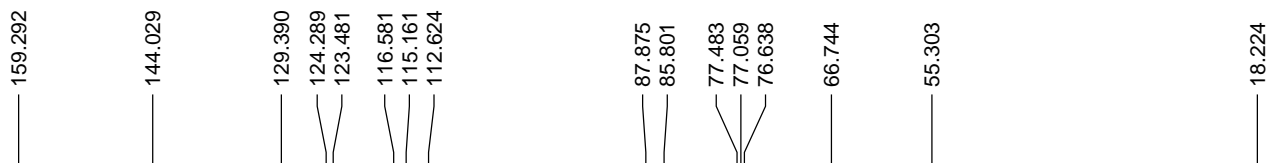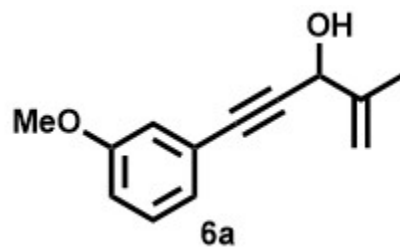

75 MHz, CDCl<sub>3</sub>

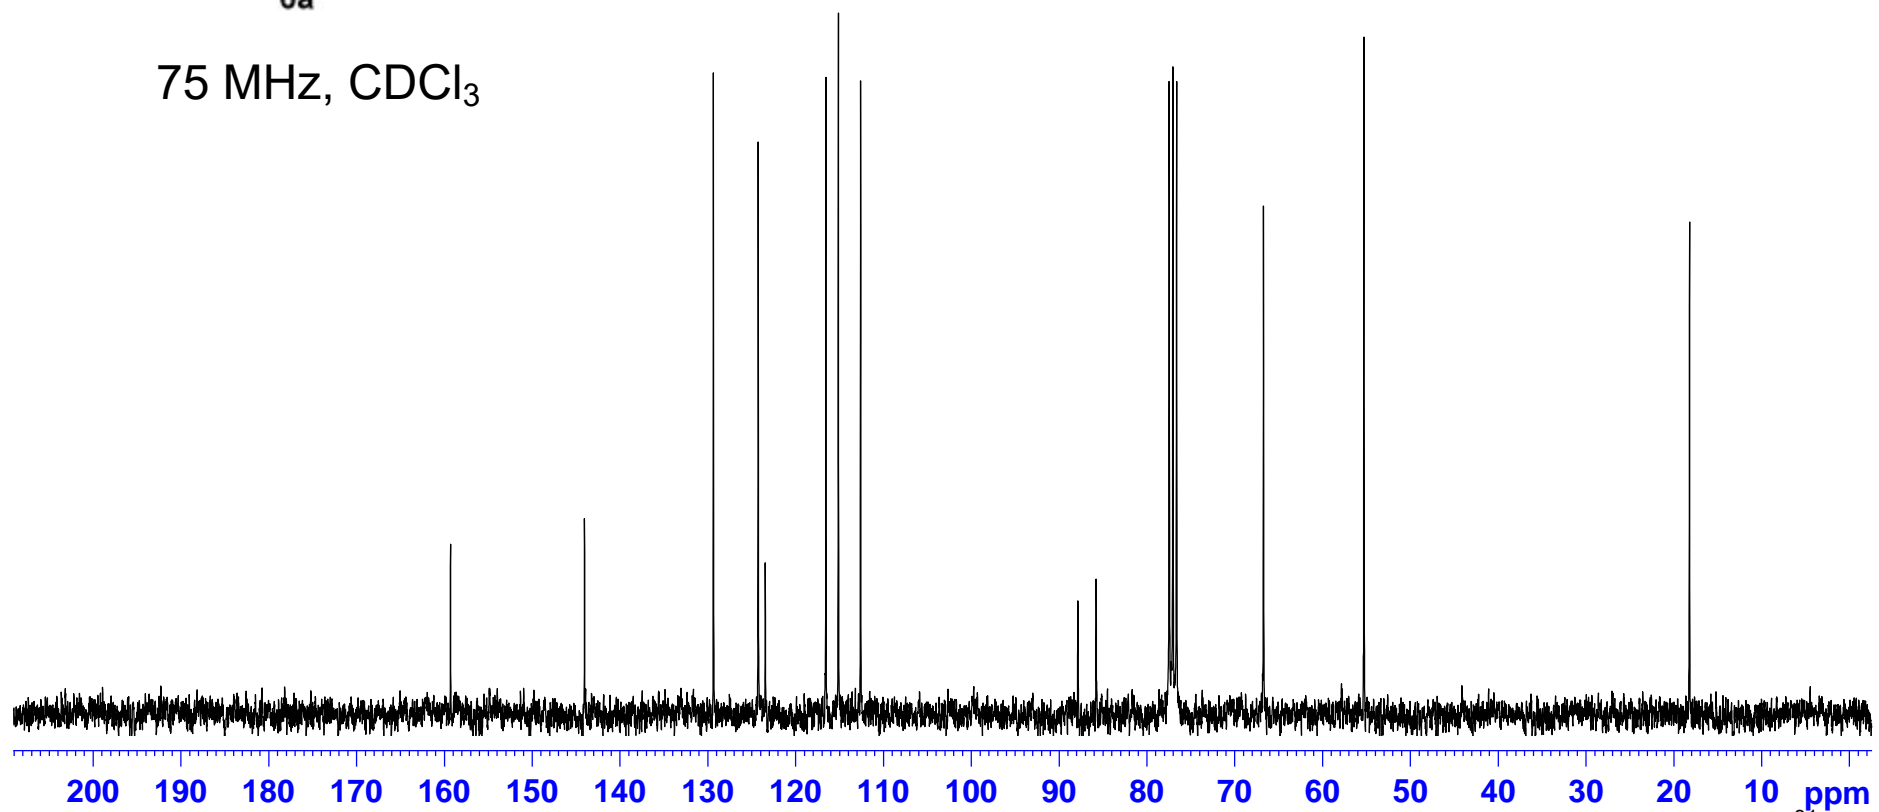

jrg.1240 8, low Rf fr, 345-MeO<sub>3</sub>Ph-CC-CH(OH)-C(Me)=CH<sub>2</sub> prep, 1/11/16

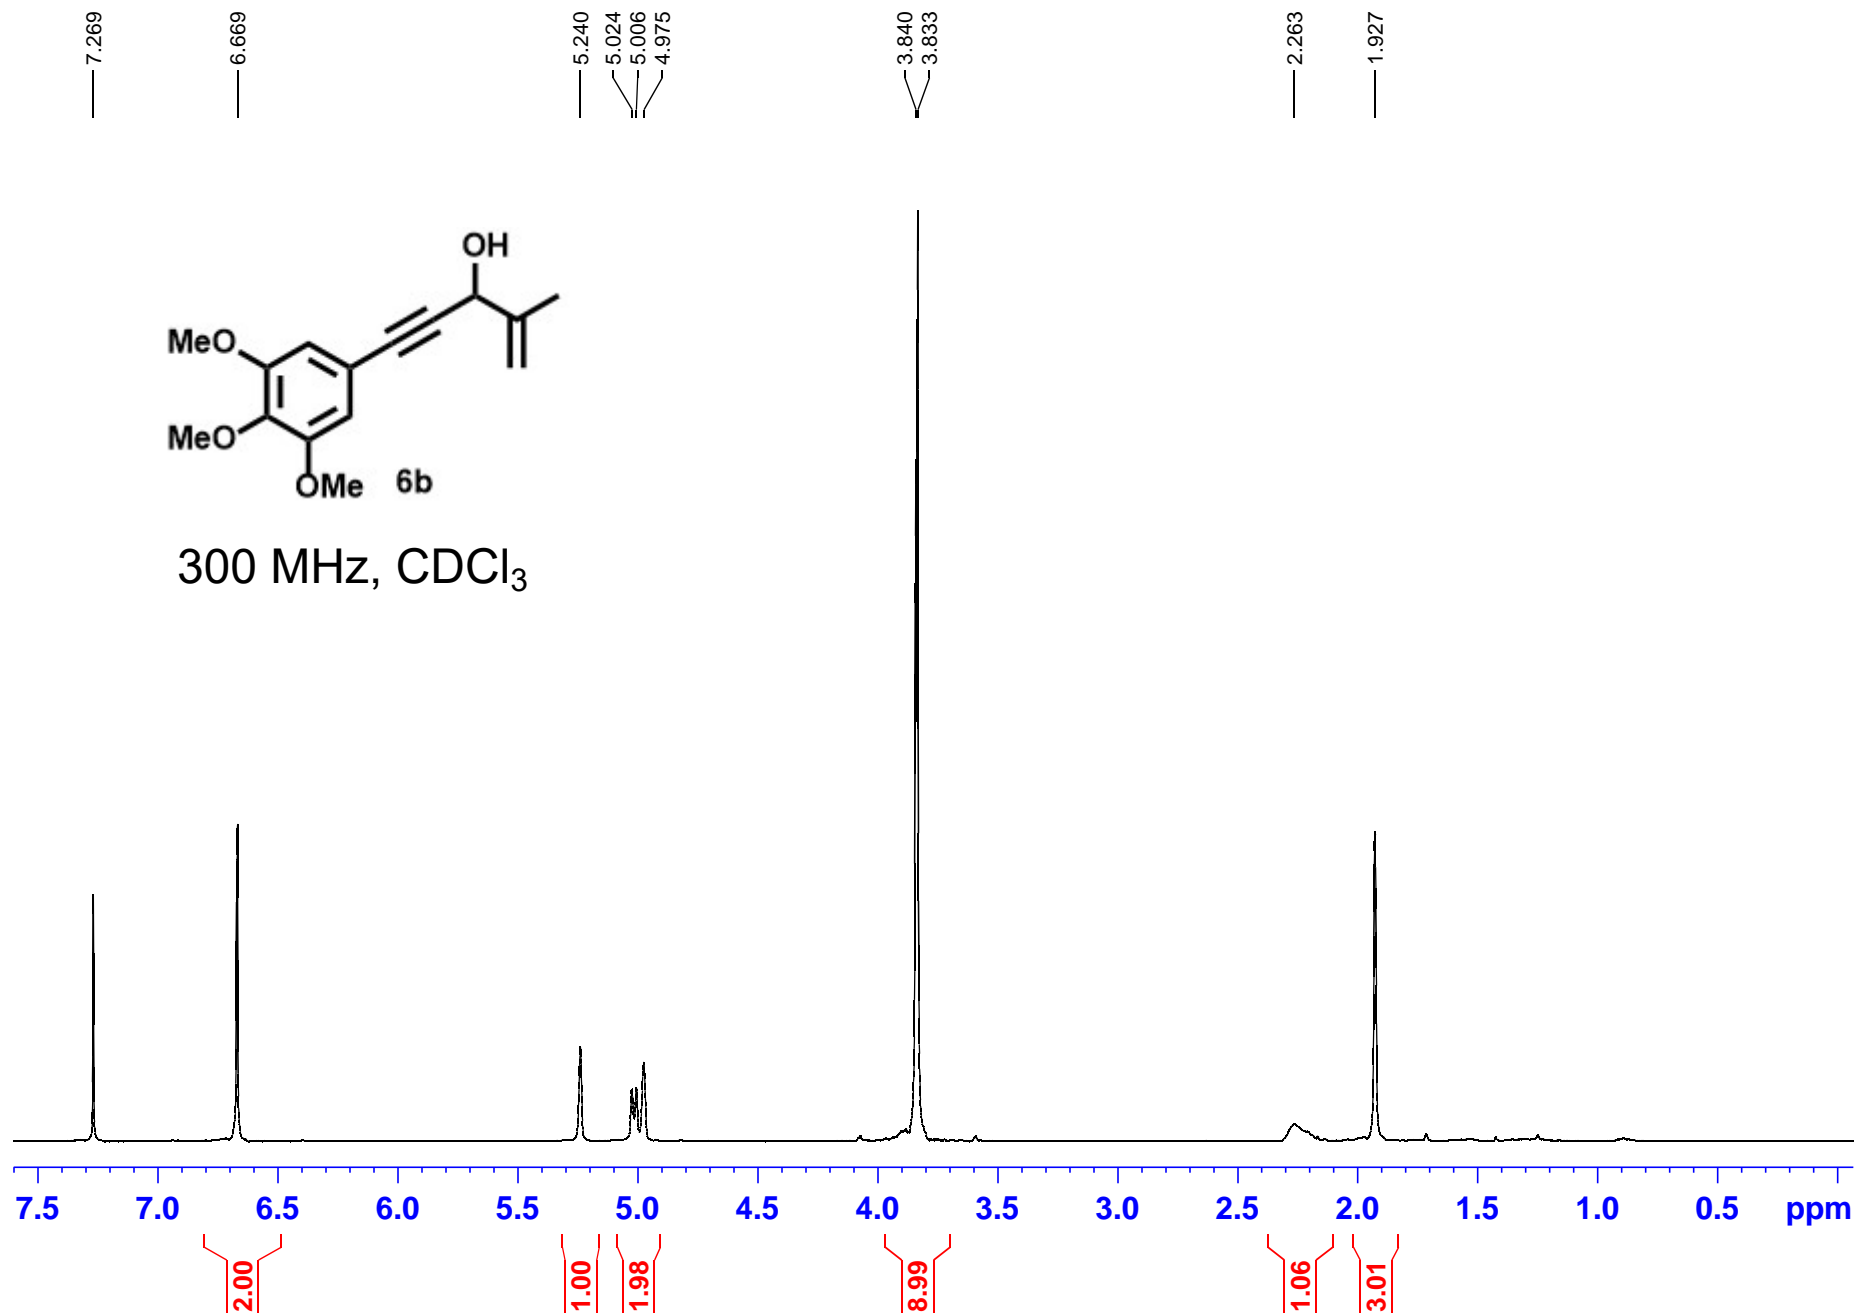



jrg.1240 9, 13C, (300US) 345-MeO3Ph-CC-CH(OH)-C(Me)=CH2, 1/11/16

152.925  
143.953  
138.819  
117.399  
112.506  
108.802  
87.048  
85.712  
77.422  
76.999  
76.574  
66.625  
60.885  
56.051  
18.159

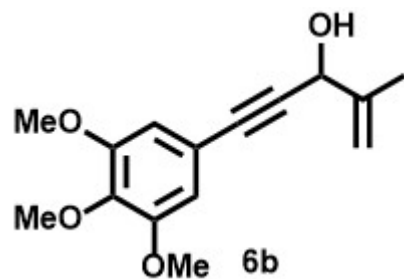

75 MHz, CDCl<sub>3</sub>

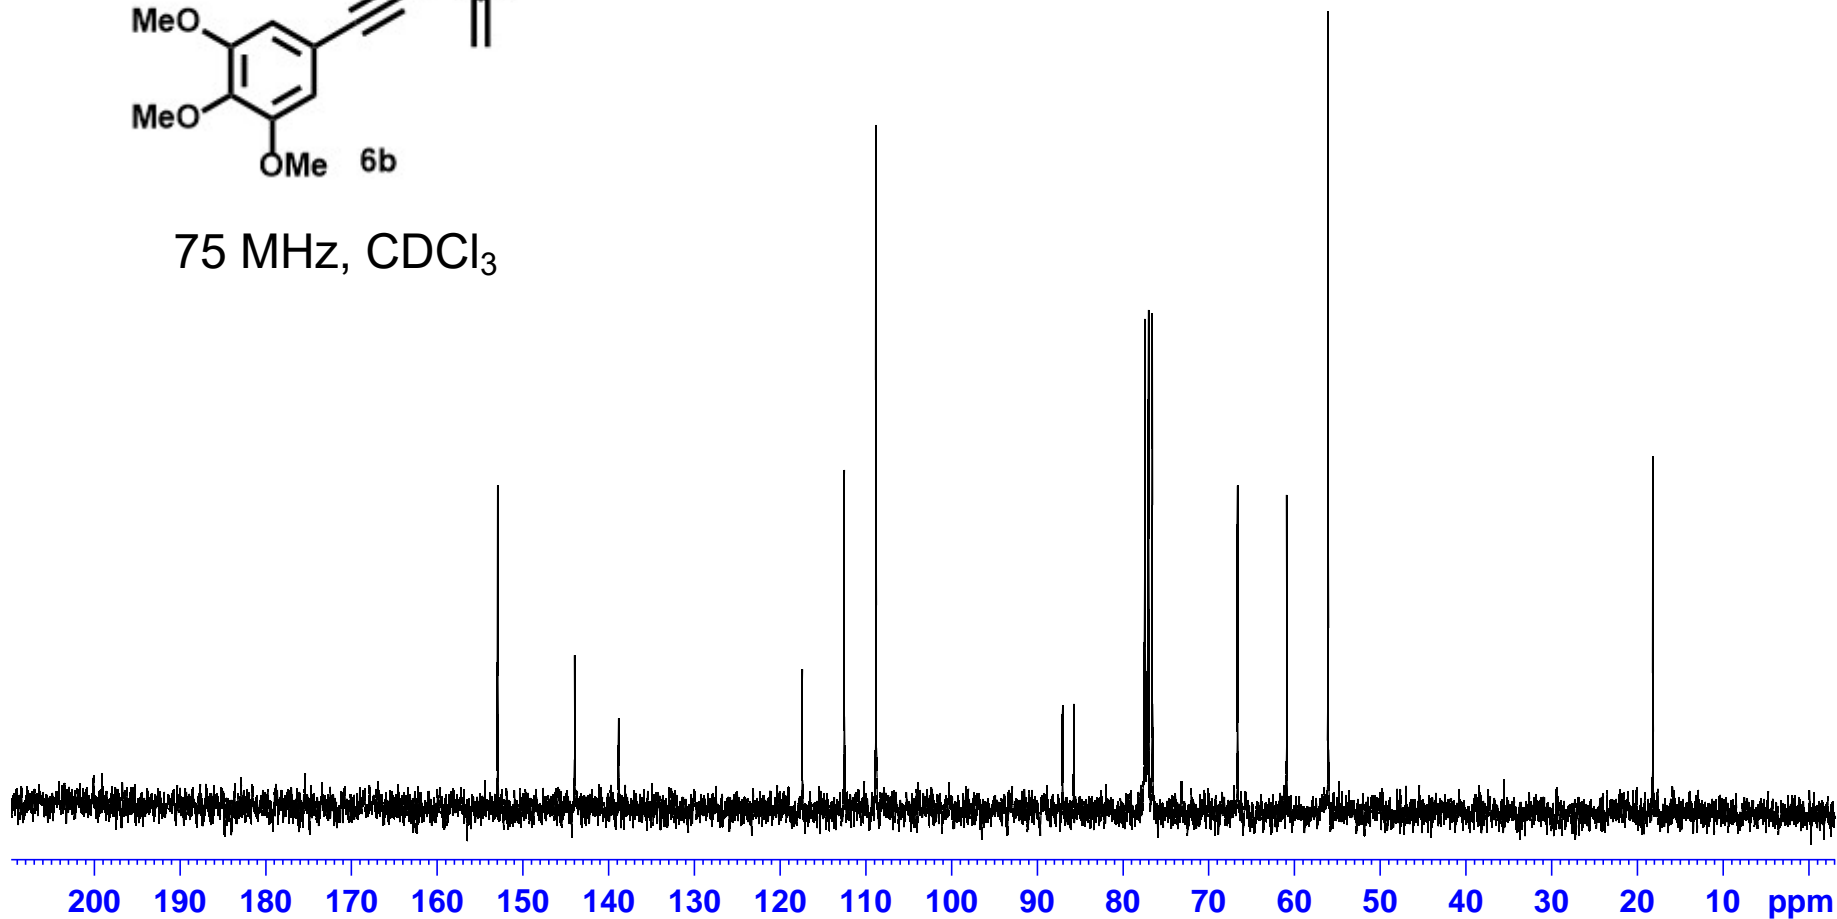

project2\_dimethoxy\_Metha\_OH\_H1  
300US

6.599  
6.591  
6.451  
6.443  
6.435

5.246  
5.243  
5.008  
4.986  
4.981  
4.979

3.770

2.096  
1.927

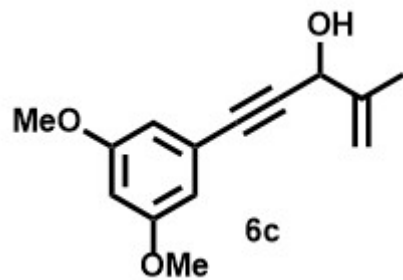

300 MHz, CDCl<sub>3</sub>

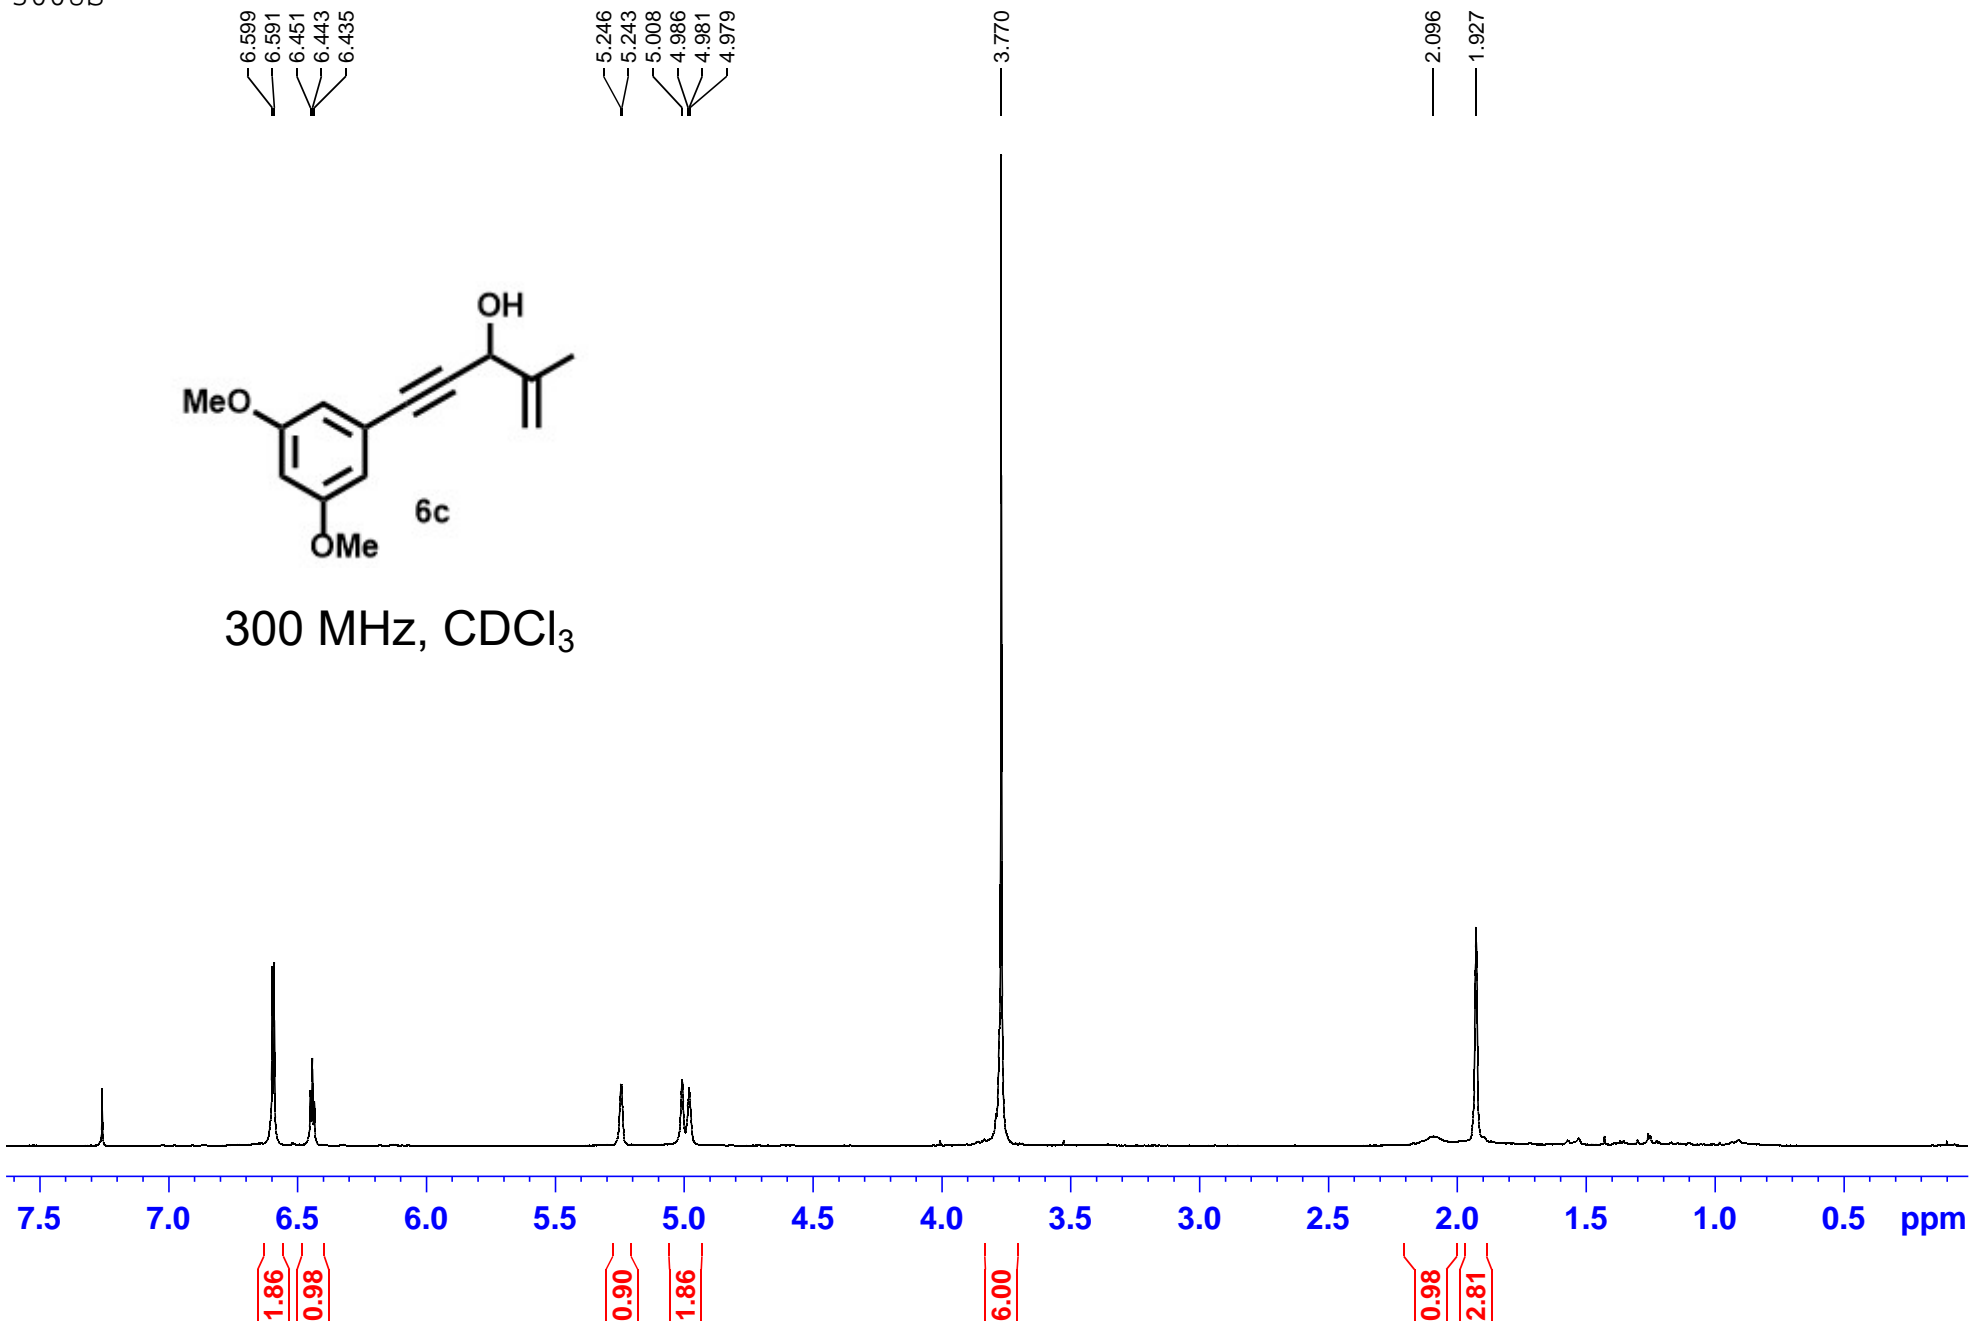

project2\_dimethoxy\_Metha\_OH\_C13  
300US

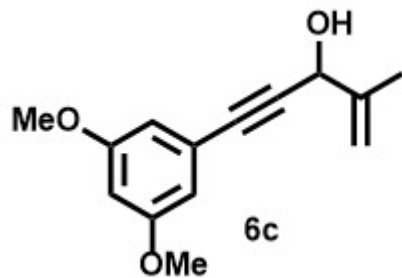

75 MHz, CDCl<sub>3</sub>

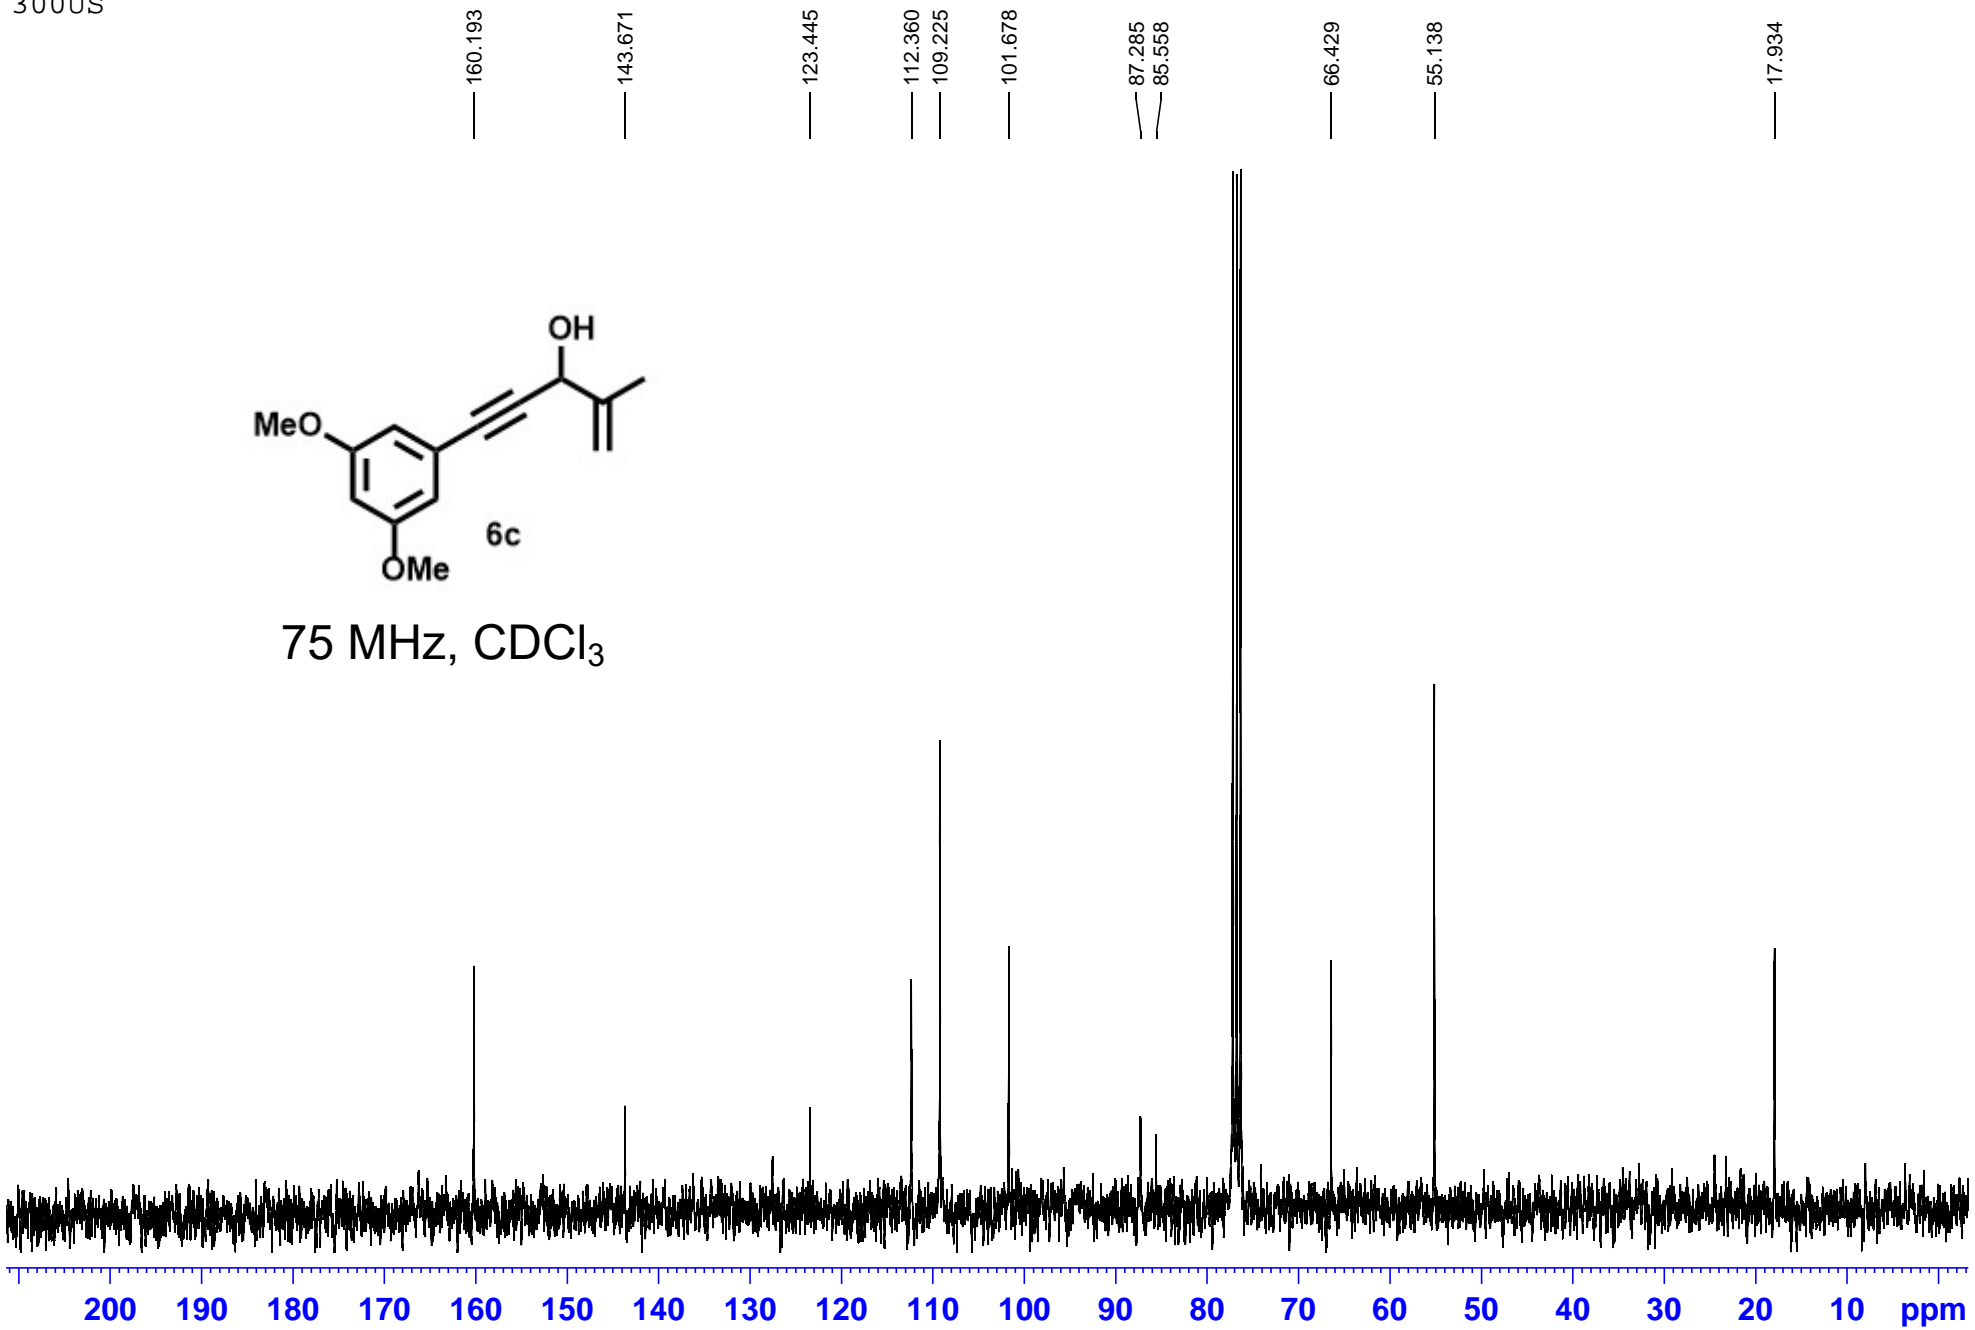

jrg.1238 12, N-Me -2-CC-CH(OH)-C(Me)=CH2 indole, 1/3/16

7.607  
7.592  
7.591  
7.292  
7.284  
7.270  
7.155  
7.148  
7.139  
7.132  
6.799

5.310  
5.139  
5.127  
5.047

3.806

2.219  
2.189  
2.177  
1.990

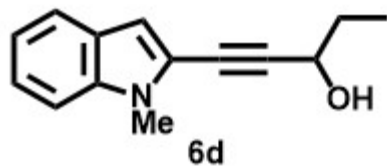

500 MHz, CDCl<sub>3</sub>

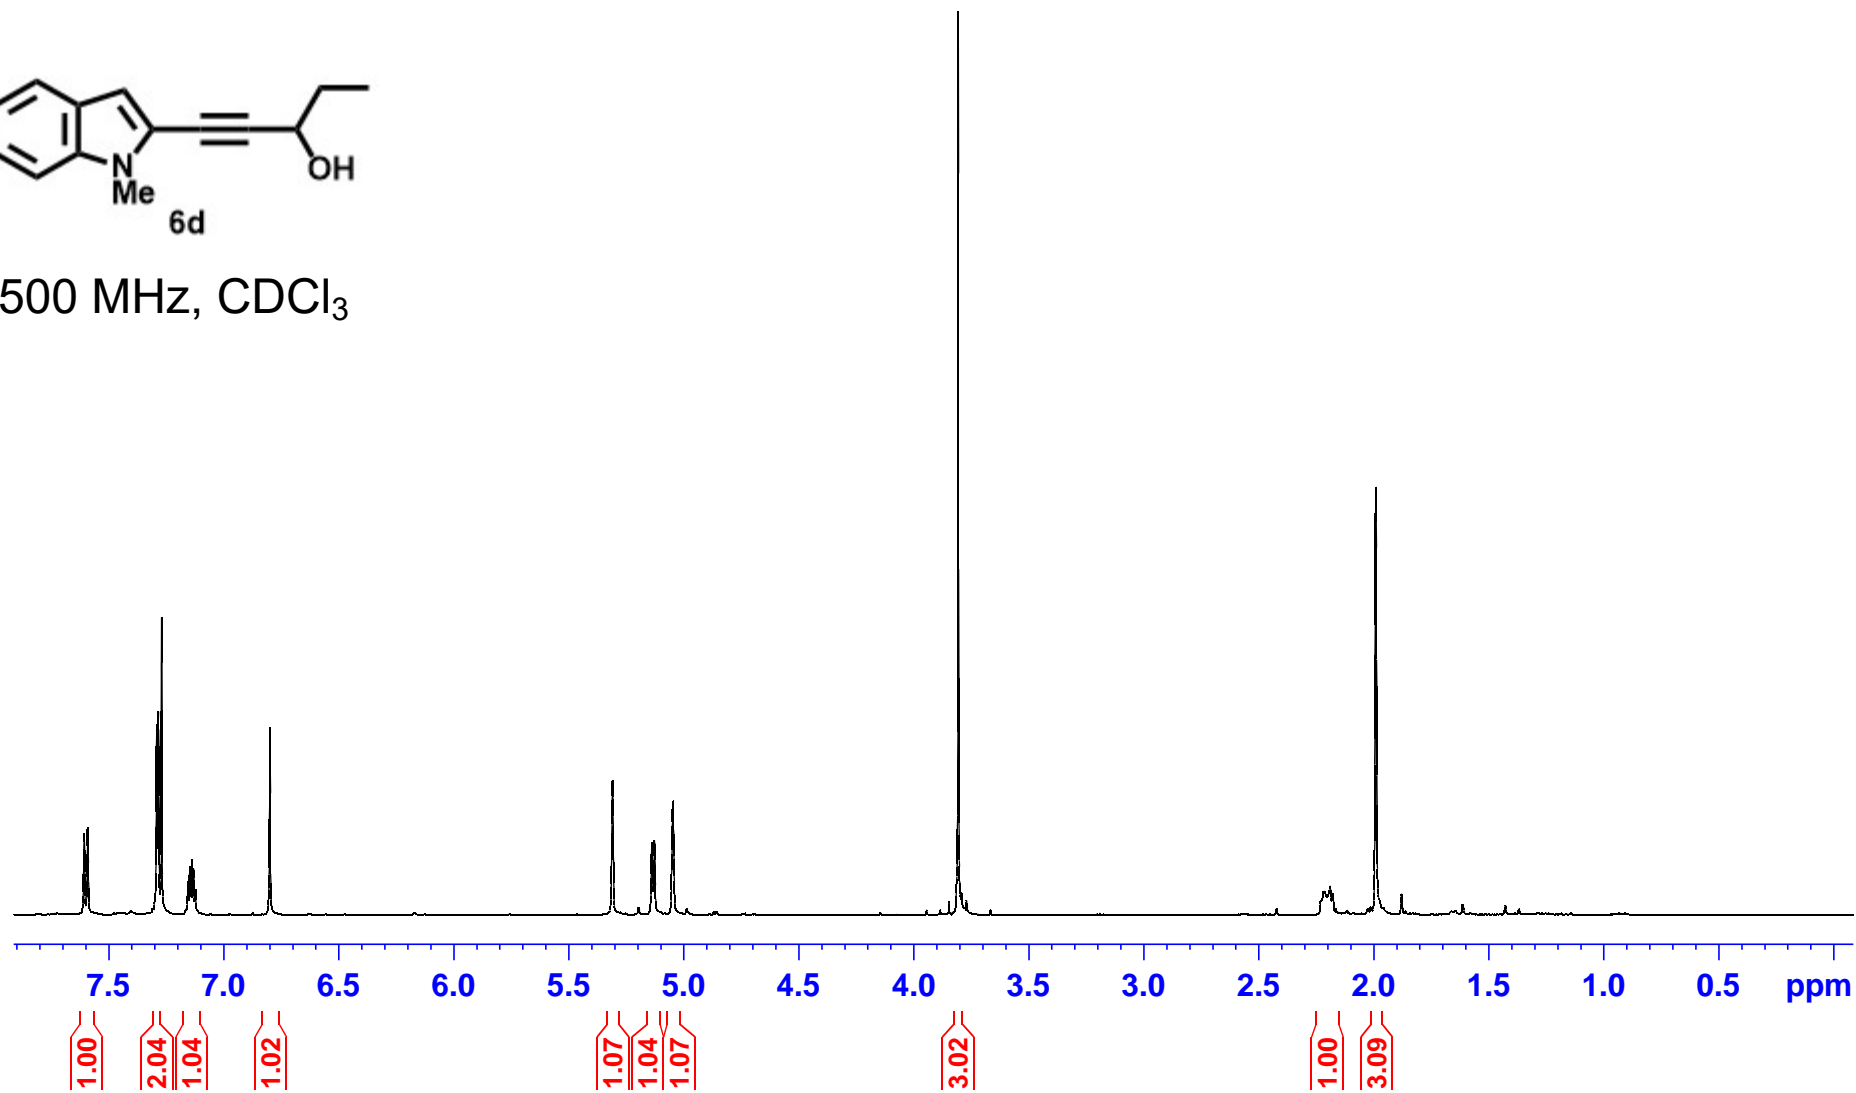

jrg.1238 14, <sup>13</sup>C, N-Me , 2-CC-CH(OH)-C(Me)=CH<sub>2</sub> indole, 1/3/16

— 143.596  
— 137.112  
— 126.957  
— 123.096  
— 121.091  
— 120.970  
— 120.055  
— 112.908  
— 109.394  
— 107.778  
— 94.017  
— 77.713  
— 77.250  
— 76.996  
— 76.742  
— 66.850  
— 30.575  
— 18.210

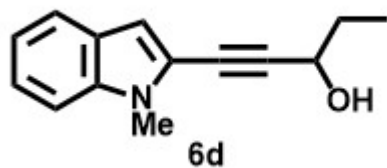

125 MHz, CDCl<sub>3</sub>

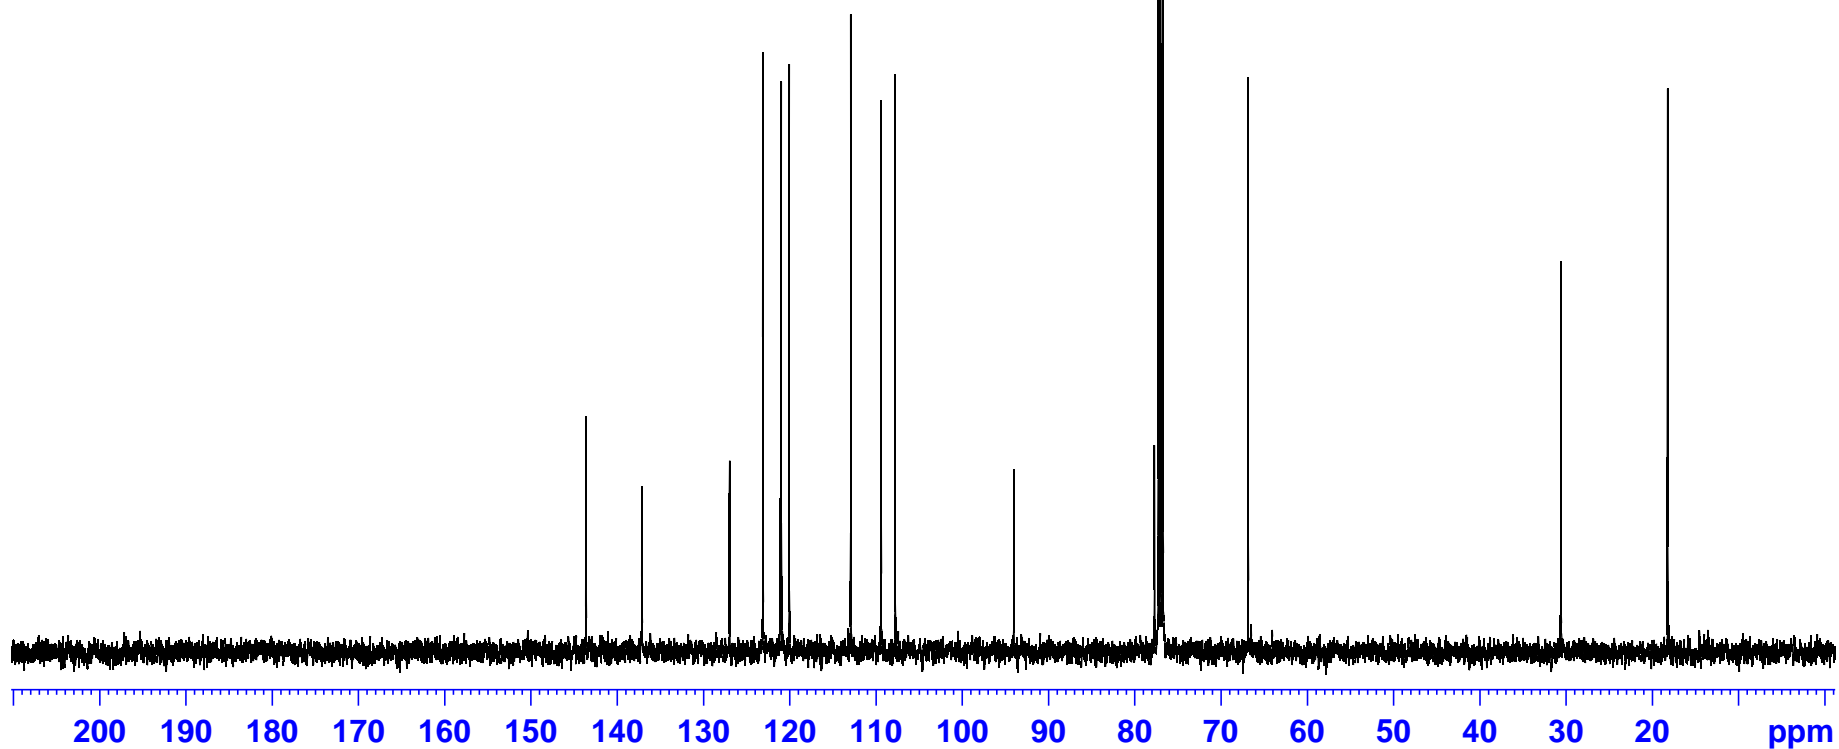

2MeO\_cc\_OH\_ch2ch3\_f2\_2  
300US

6.600  
6.592  
6.451  
6.444  
6.436

5.336  
5.332  
5.329  
5.051  
4.995

3.773

2.333  
2.308  
2.283  
2.259  
1.980

1.170  
1.145  
1.120

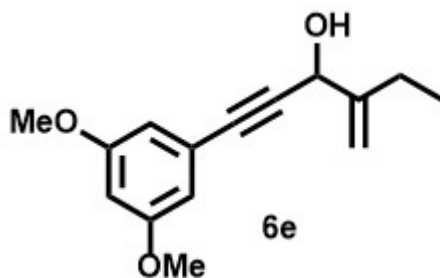

300 MHz, CDCl<sub>3</sub>

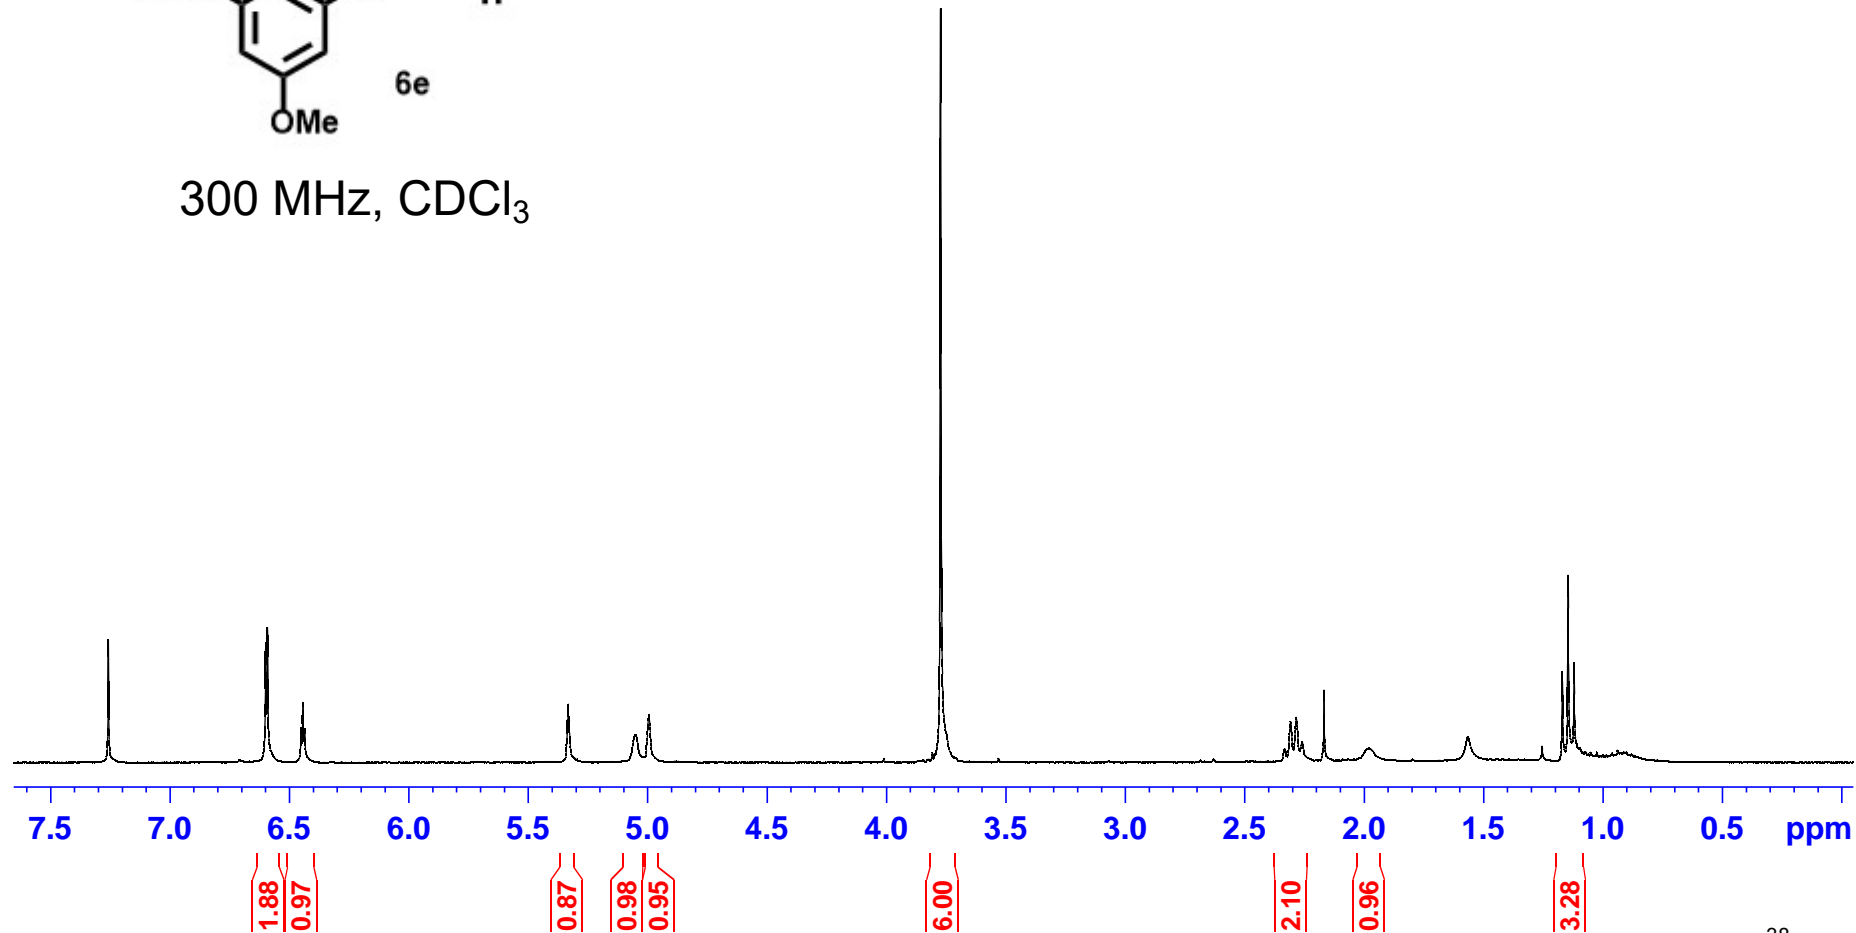

jrg.1283 10, 13C, 3,5-MeO)2Ph-CC-CH(OH)(Et)=CH2, 7/18/17

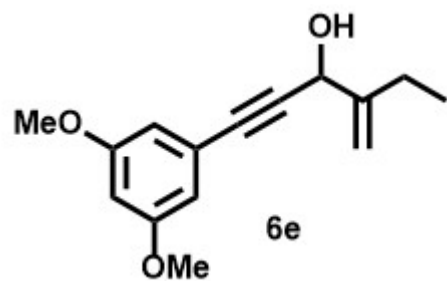

75 MHz, CDCl<sub>3</sub>

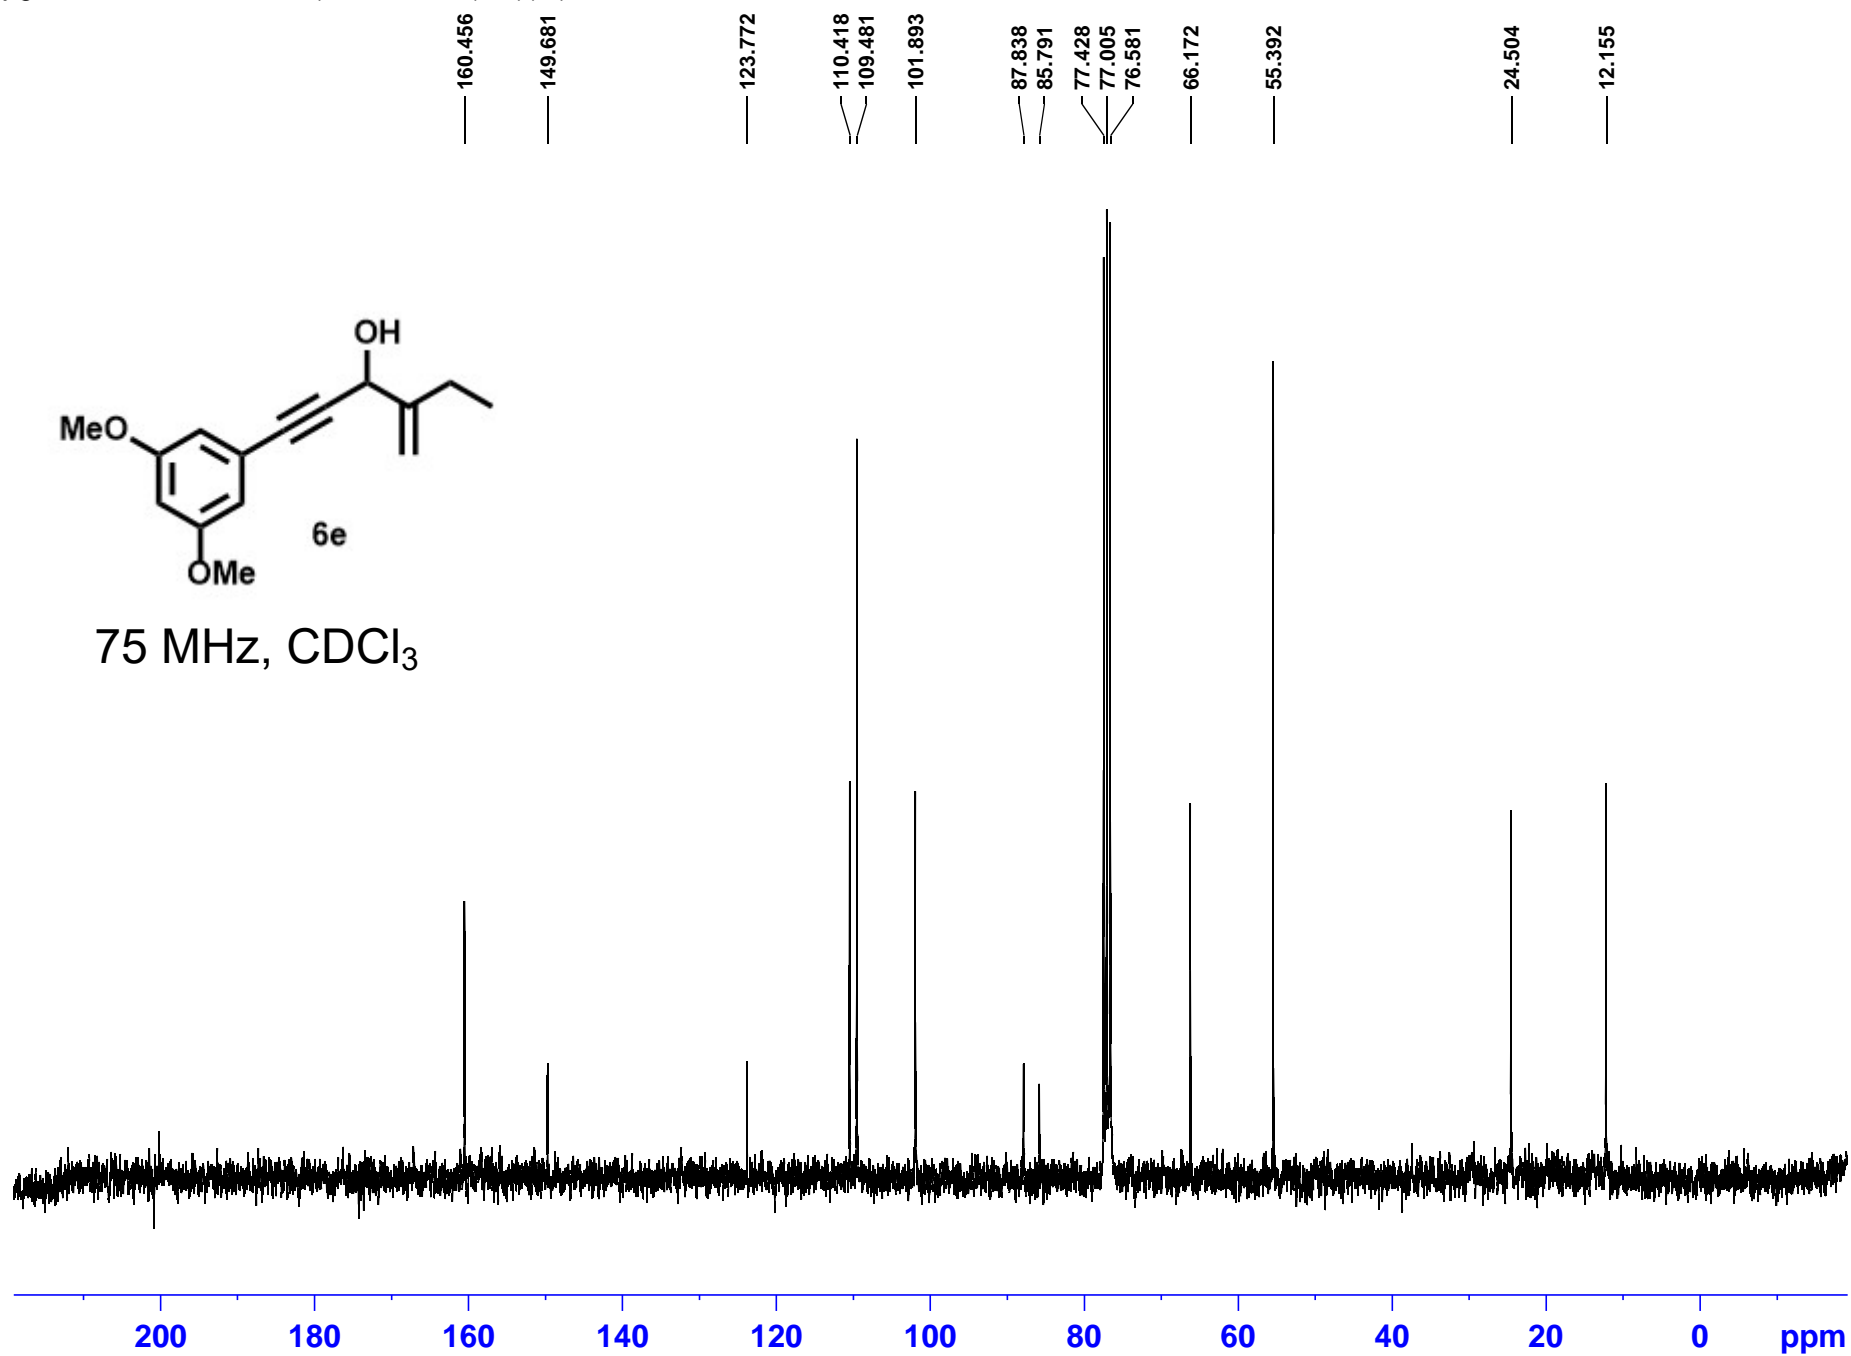

2MeO\_cc\_OH\_Bn\_H1

1D 1H

DPX300

7.319  
7.315  
7.303  
7.295  
7.277  
7.260  
7.255  
7.237  
7.228  
6.595  
6.587  
6.468  
6.460  
6.452

5.458

5.009  
4.996  
4.953

3.778  
3.616

2.161  
2.143

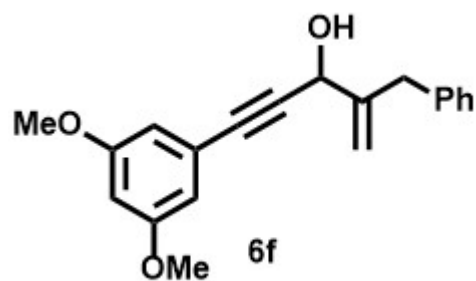

300 MHz, CDCl<sub>3</sub>

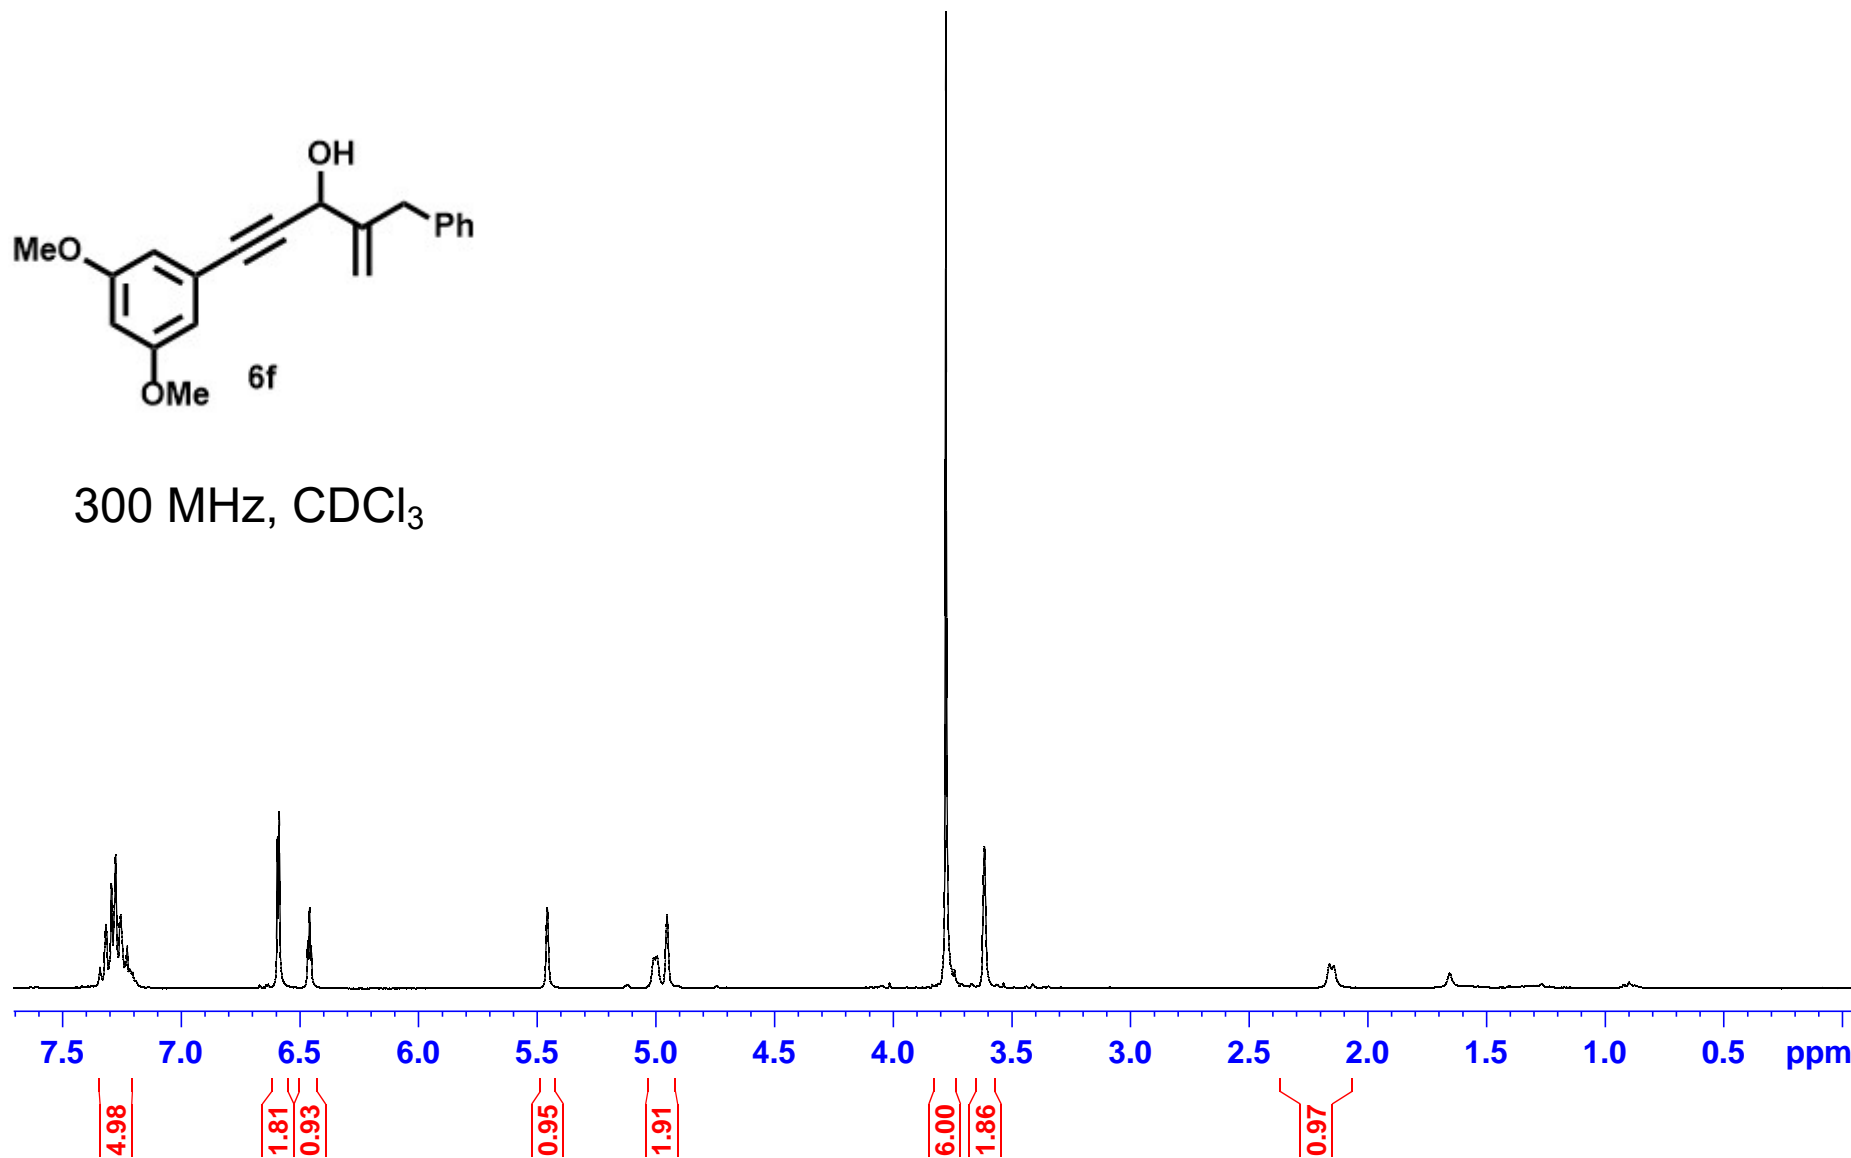



jrg.1281 7, <sup>13</sup>C, 3,5-di(OMe)Ph-CC-CH(OH)-C(Bn)=CH<sub>2</sub>

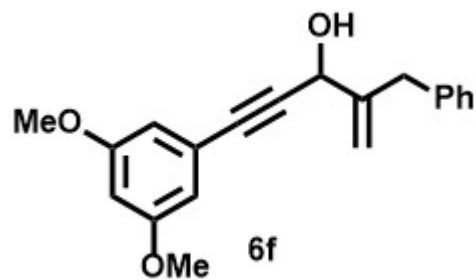

125 MHz, CDCl<sub>3</sub>

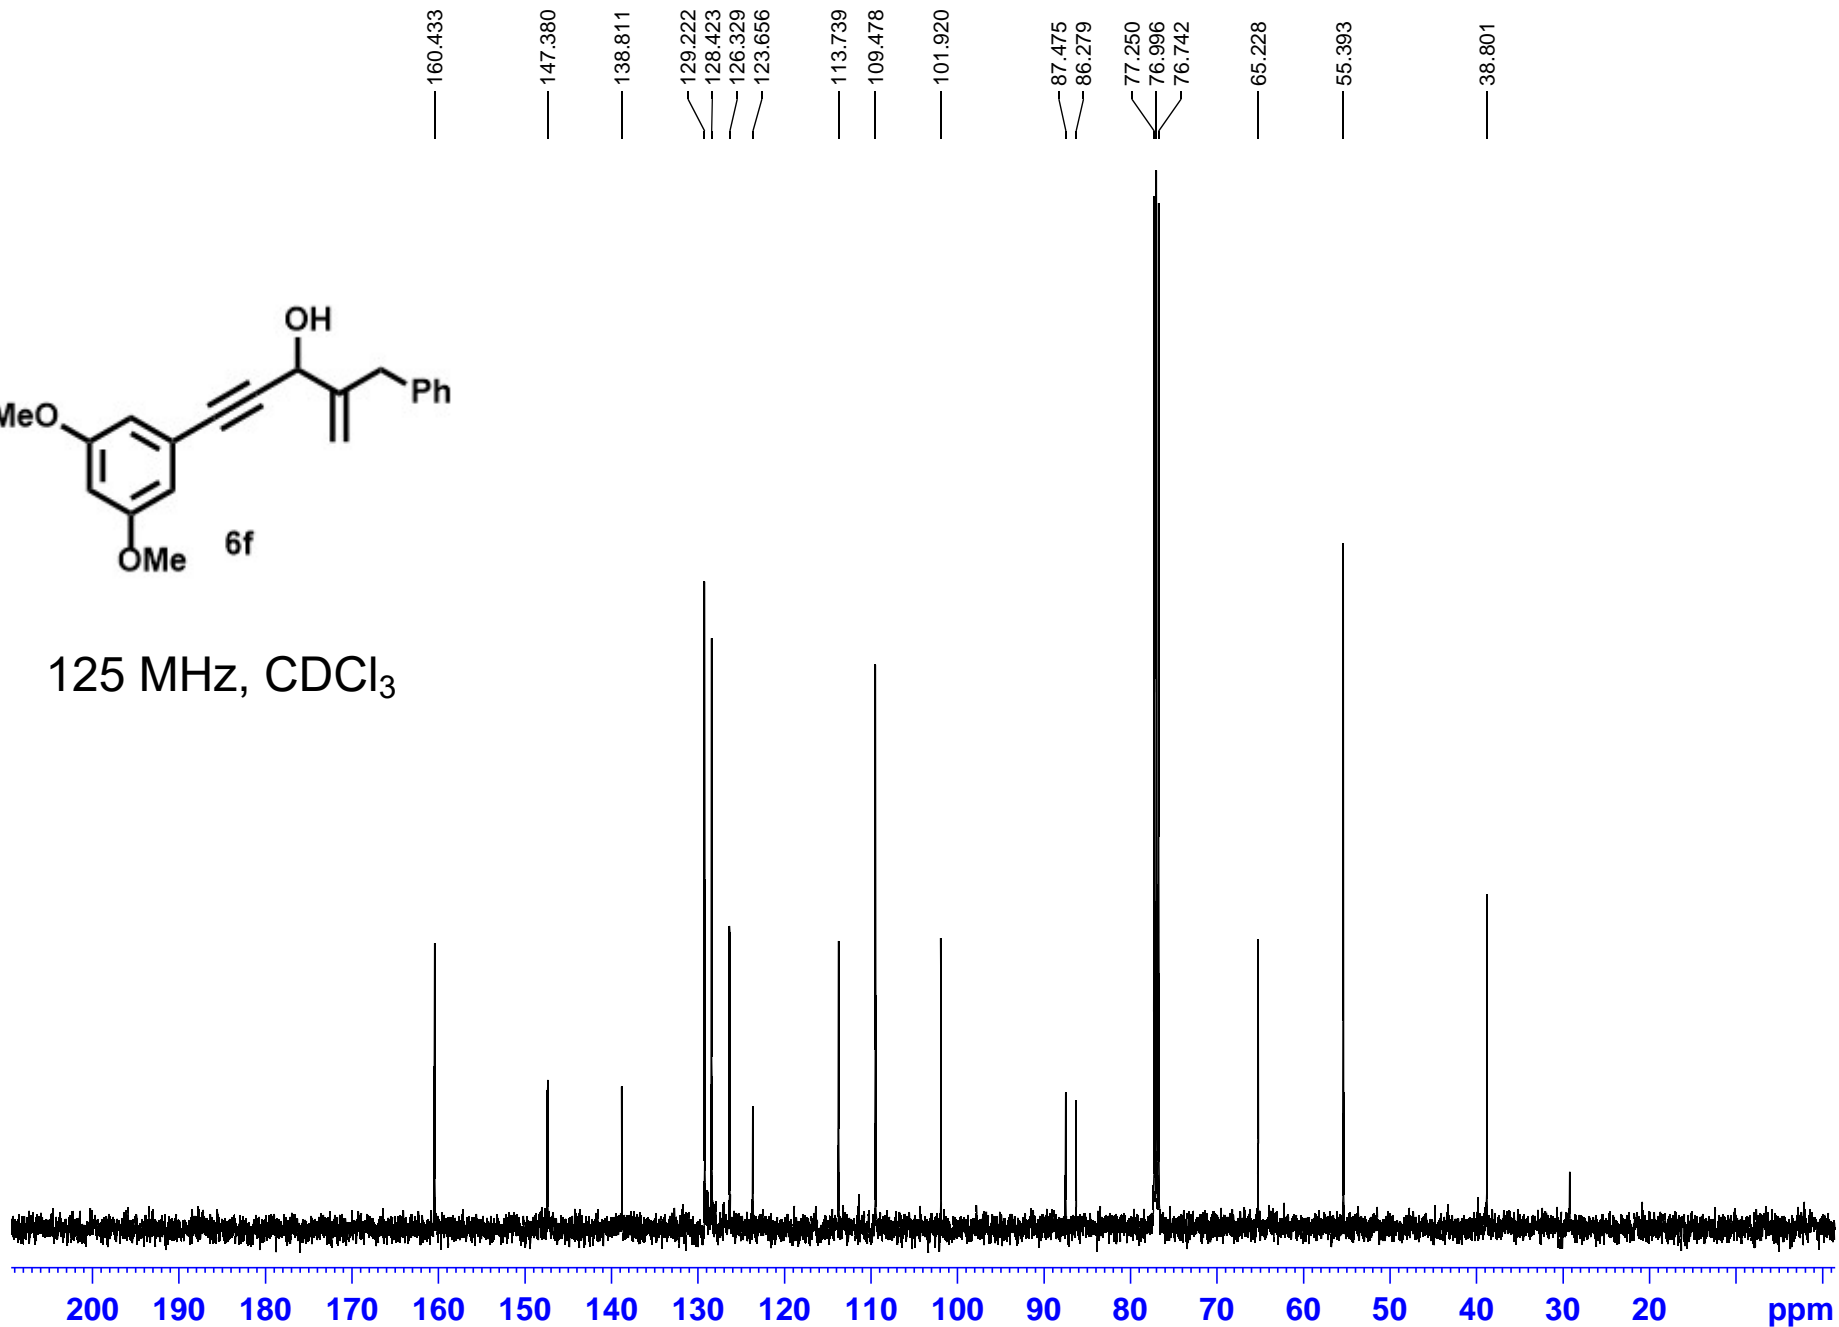

som.06f 1 1H, (MeO)2Ph-CC-CH(OH)-C(iPr)=CH2, 9/2/21

7.268  
6.601  
6.596  
6.452  
6.448  
6.444

5.398  
5.100  
5.049

3.770

2.630  
2.617  
2.603  
2.589  
2.576  
2.242

1.164  
1.150

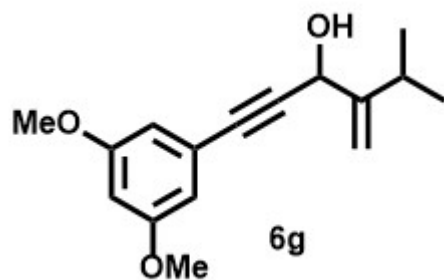

500 MHz, CDCl<sub>3</sub>

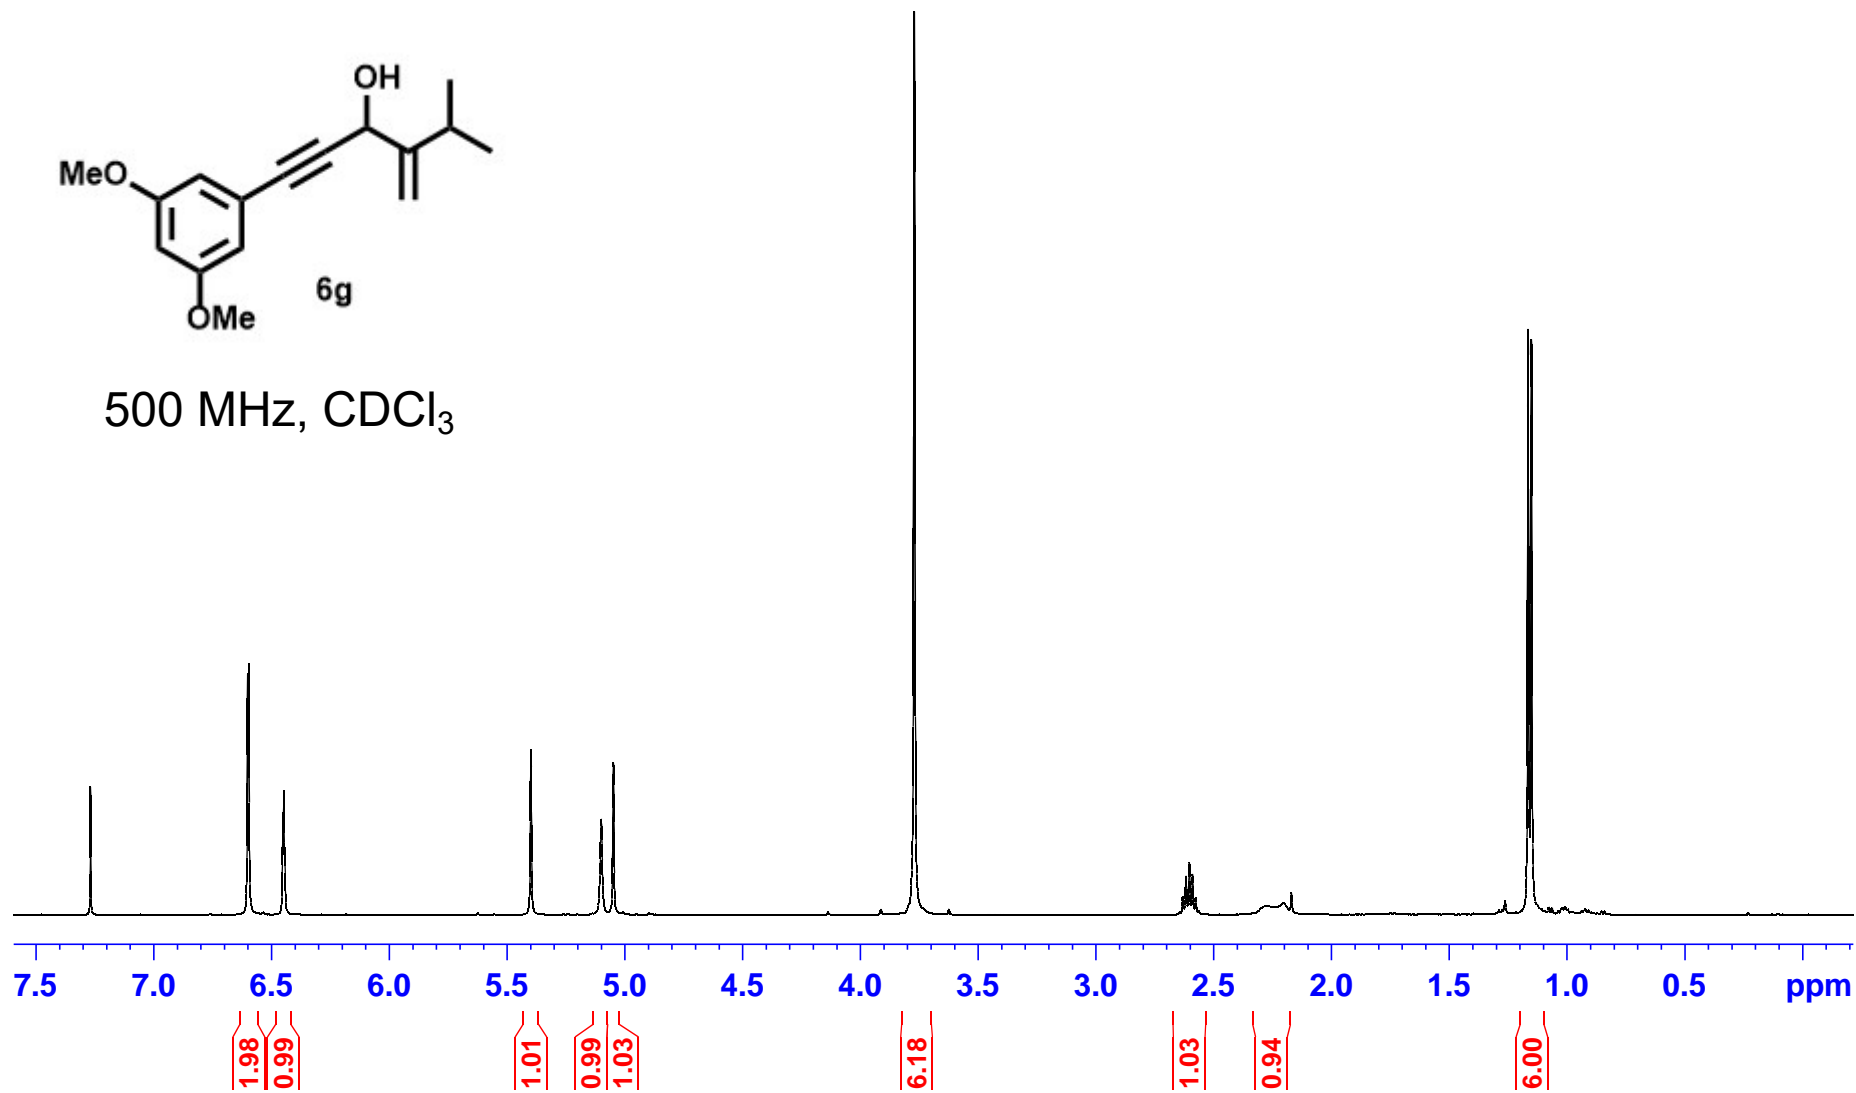

som.06f 2 13C, (MeO)2Ph-CC-CH(OH)-C(iPr)=CH2, 9/2/21

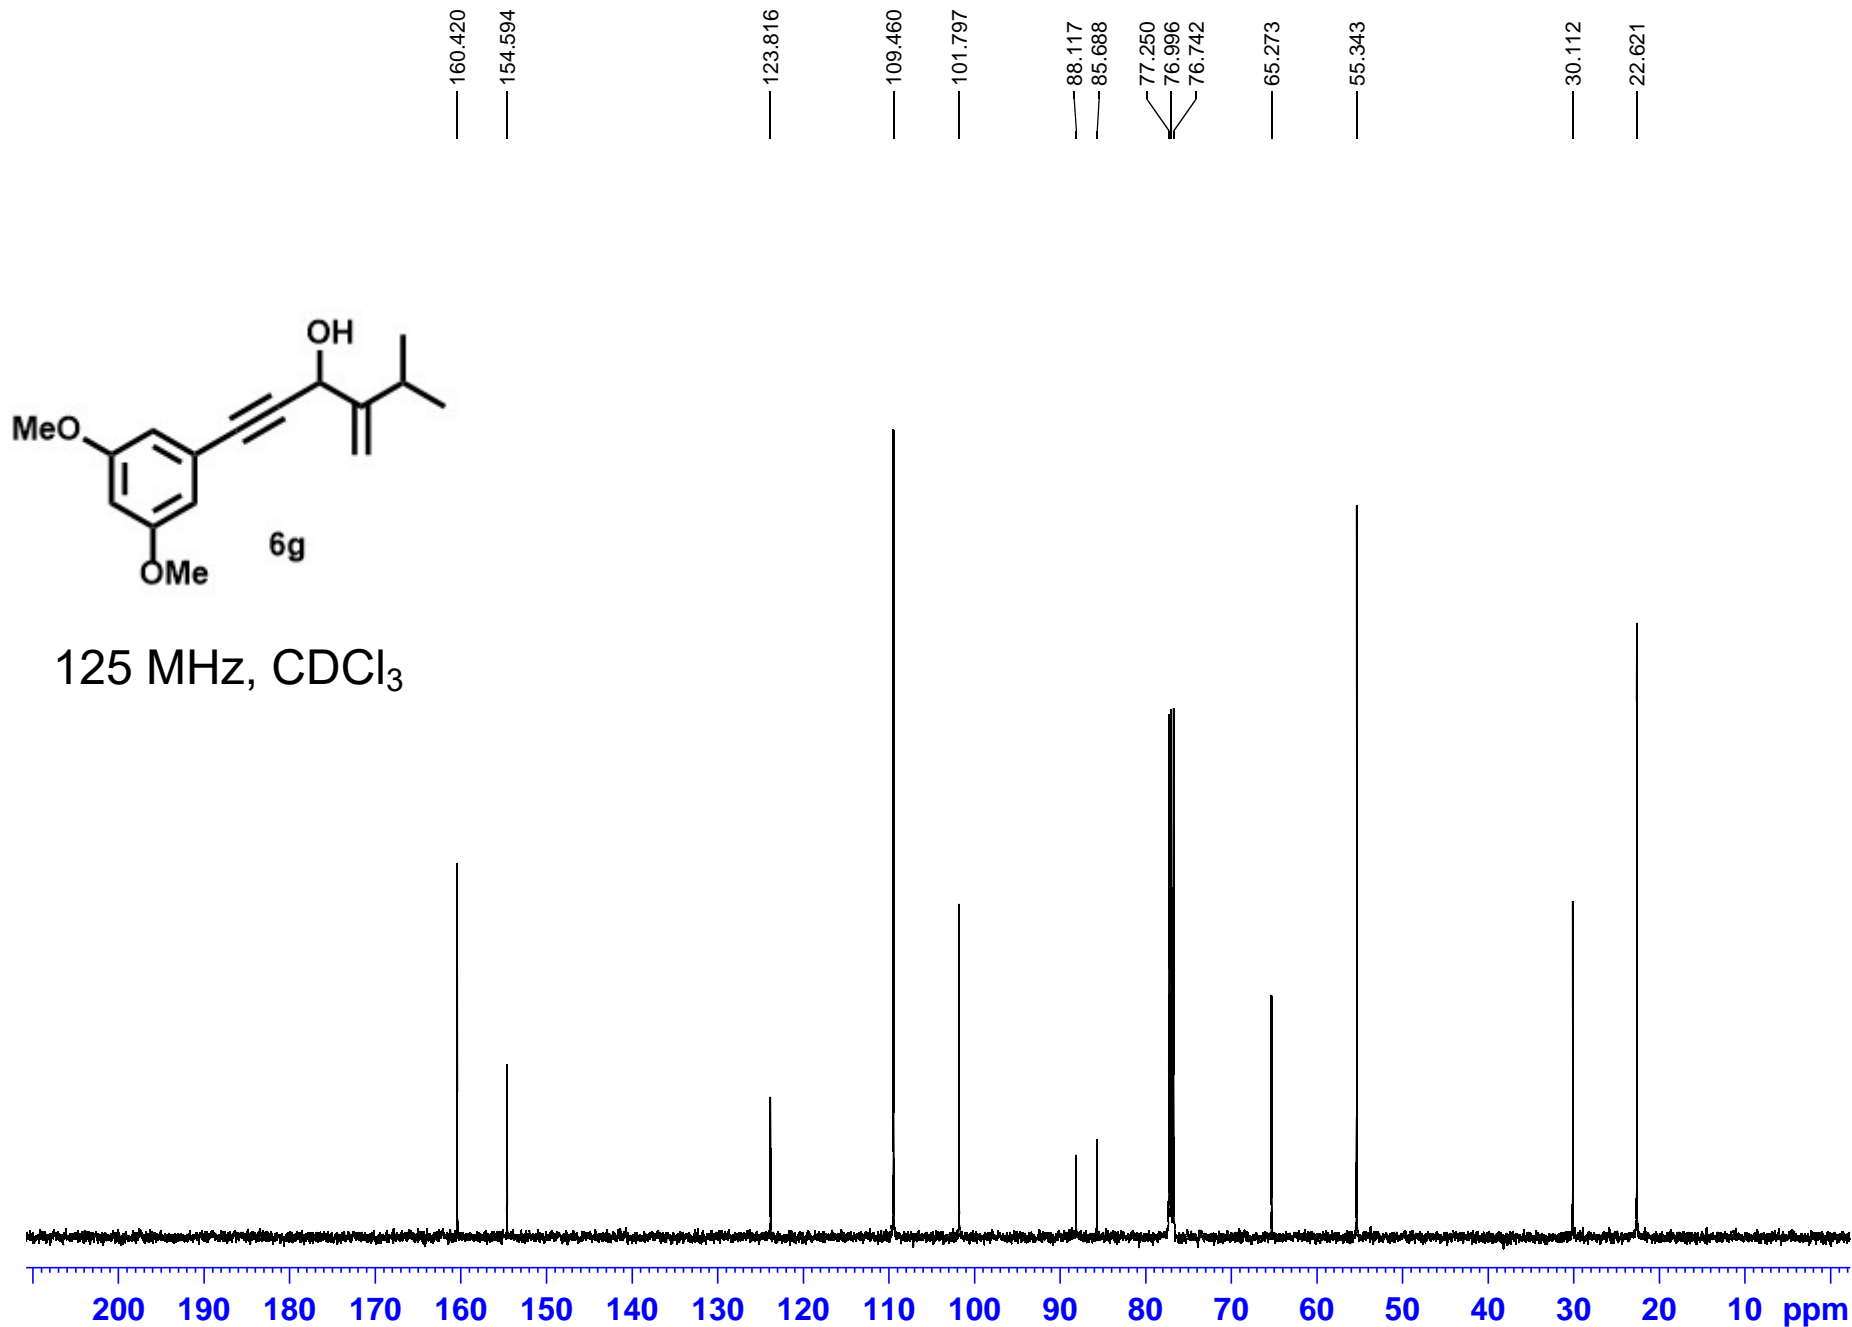

jrg.1457 9, (MeO)<sub>2</sub>Ph-CC-CH(OH)-C(TIPS)=CH<sub>2</sub>, 9/17/21

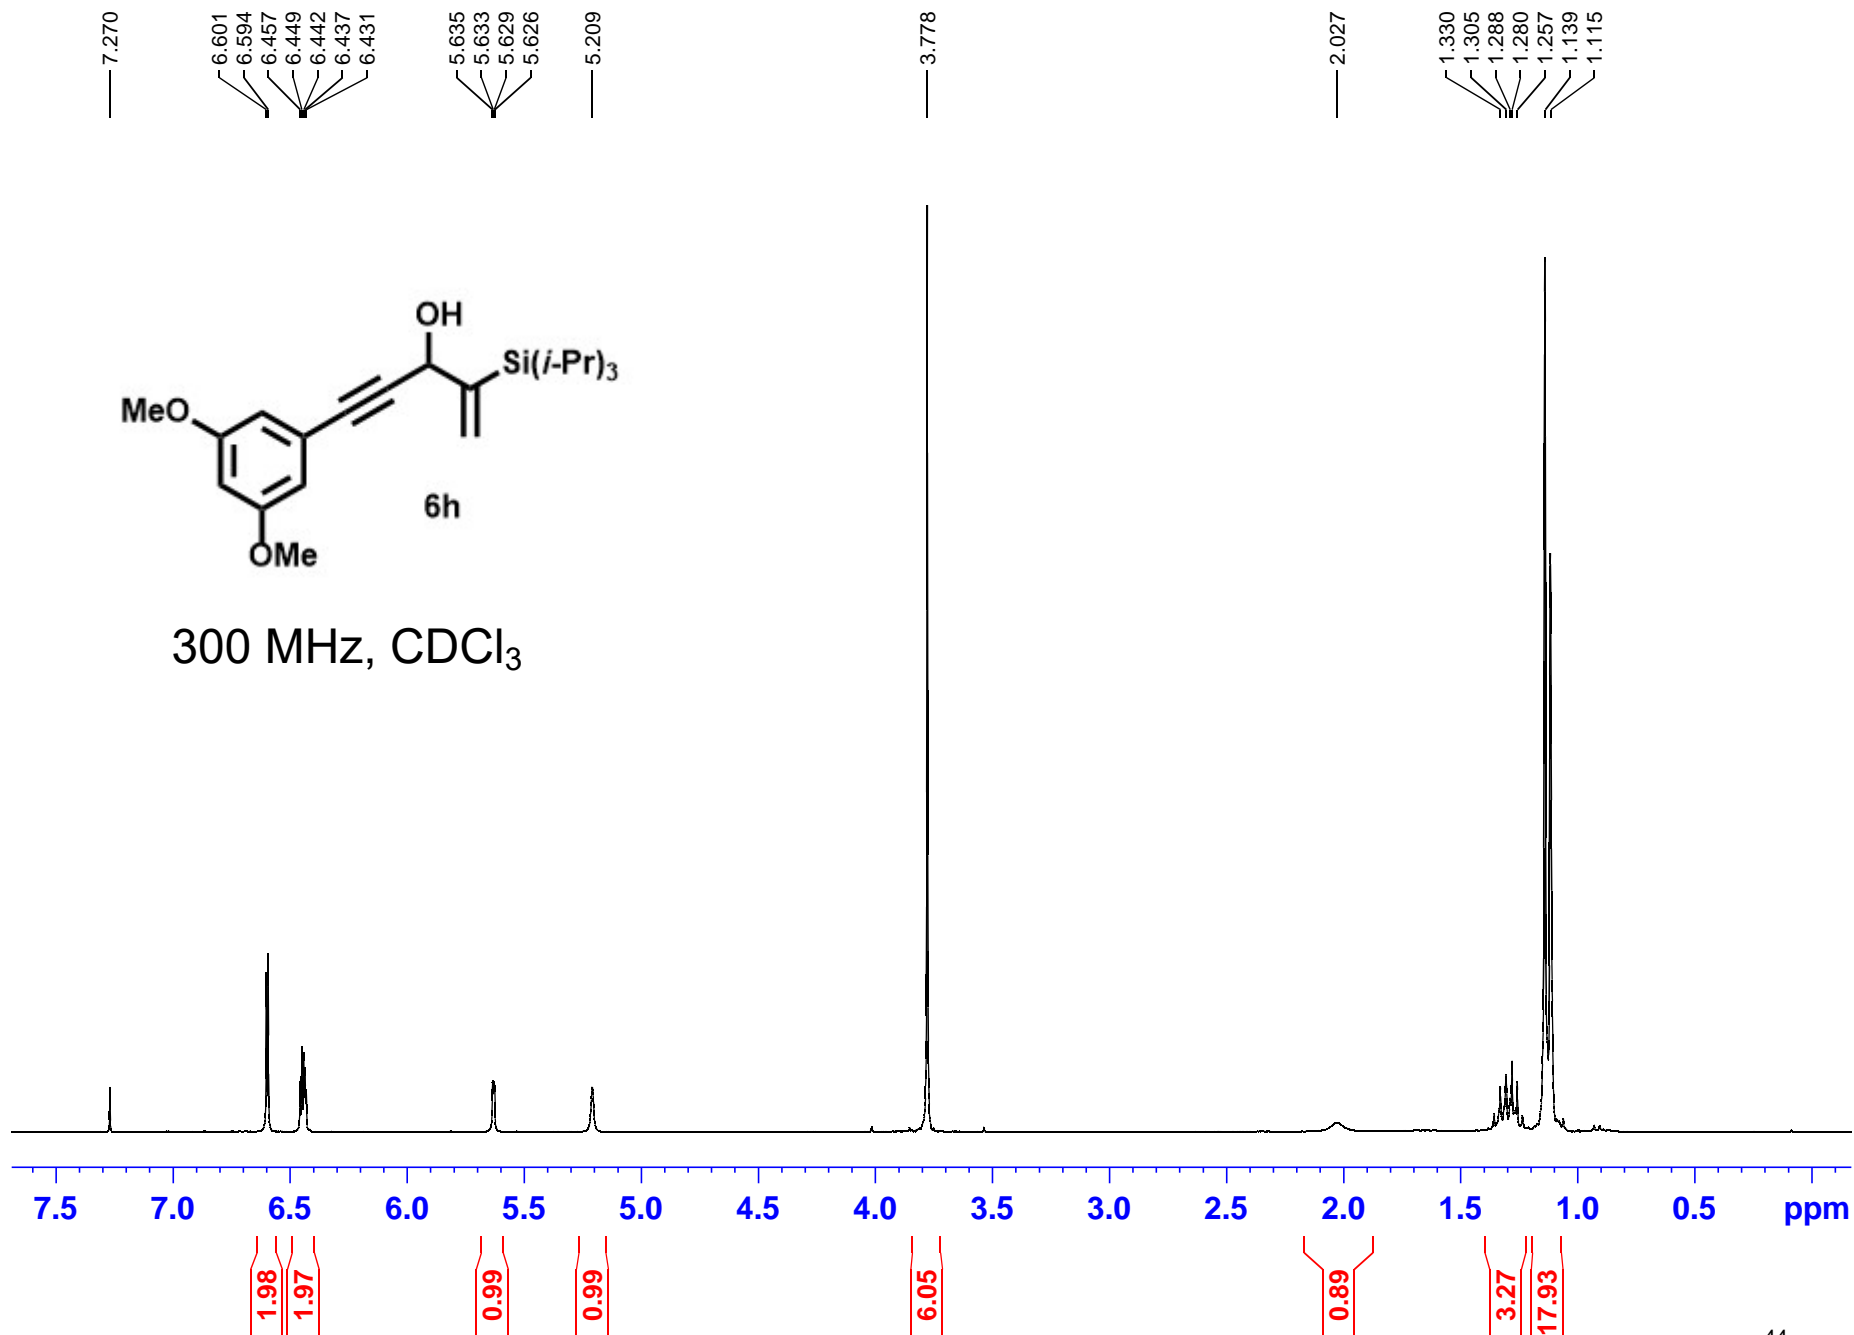

jrg.1457 8,  $^{13}\text{C}$ , (MeO) $_2$ Ph-CC-CH(OH)-C(TIPS)=CH $_2$ , B82, 9/17/21

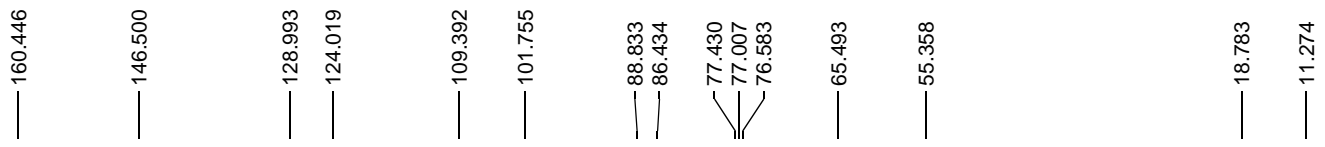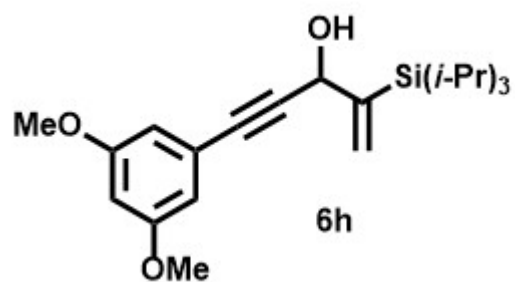

75 MHz, CDCl $_3$

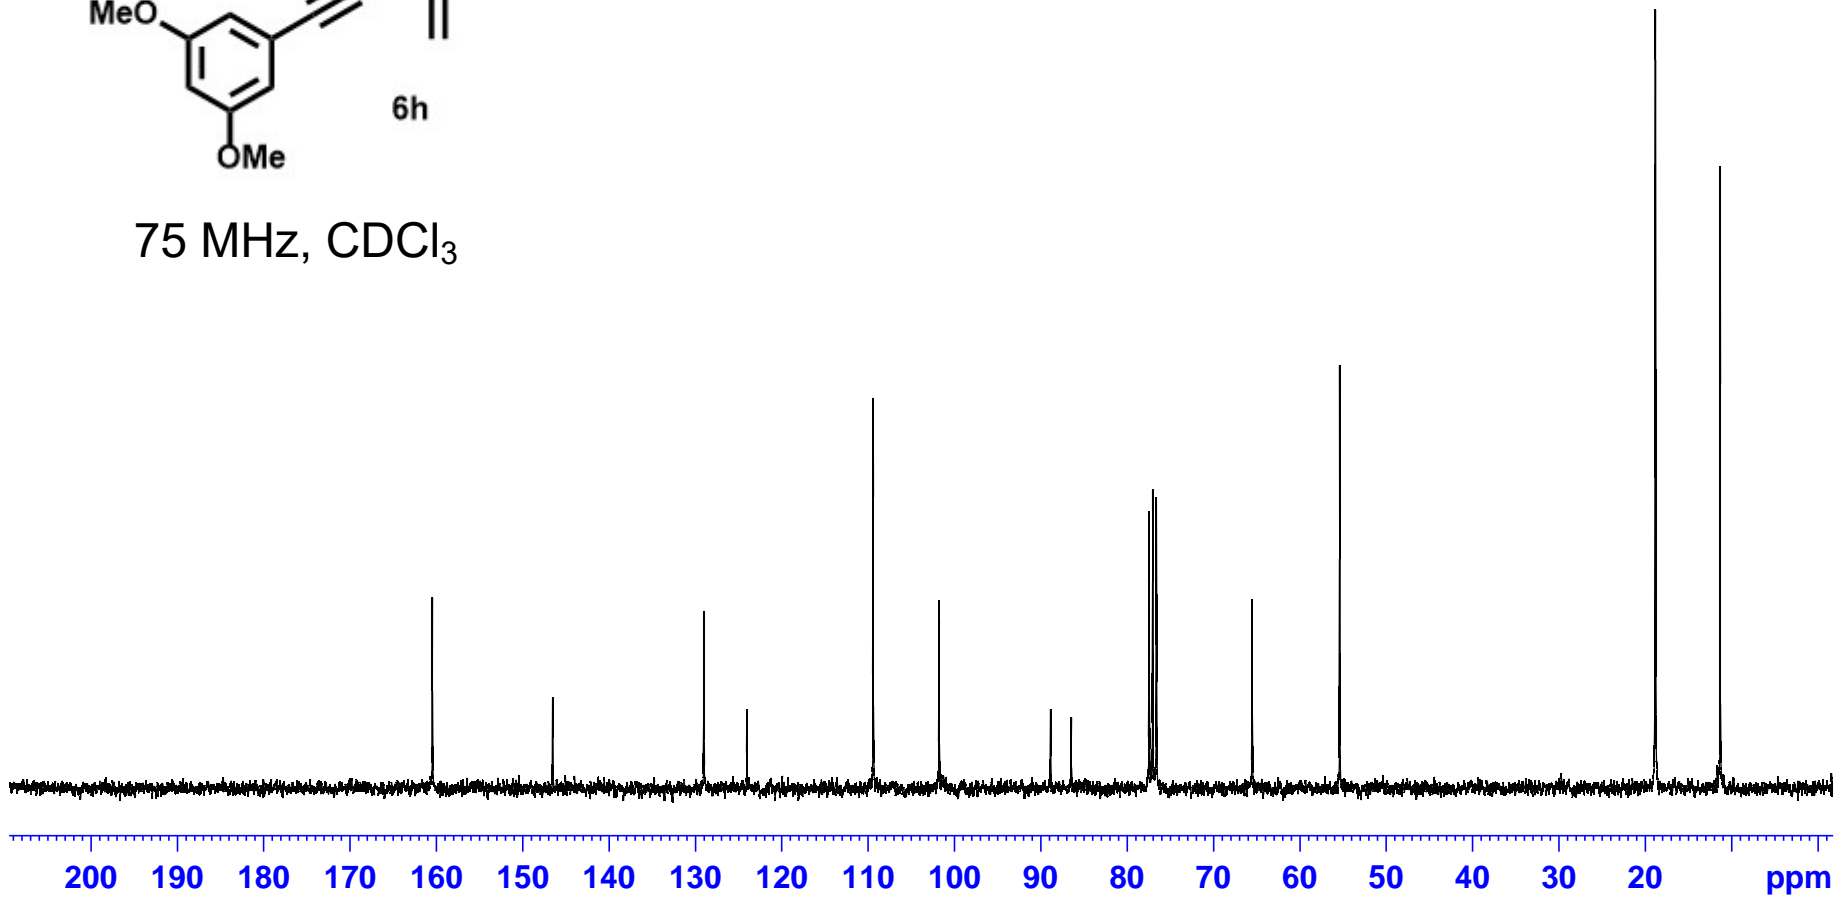

som.06i 2, cyclohexenyl-CC-C(OH)-C(Me)=CH2, B82, 8/16/21

7.270

6.127  
6.121  
6.114

5.169  
5.166  
4.916  
4.913  
4.911  
4.906  
4.884

2.114  
2.093  
2.077  
1.866  
1.612  
1.609  
1.602  
1.590  
1.587

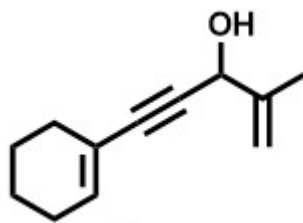

6i

300 MHz, CDCl<sub>3</sub>

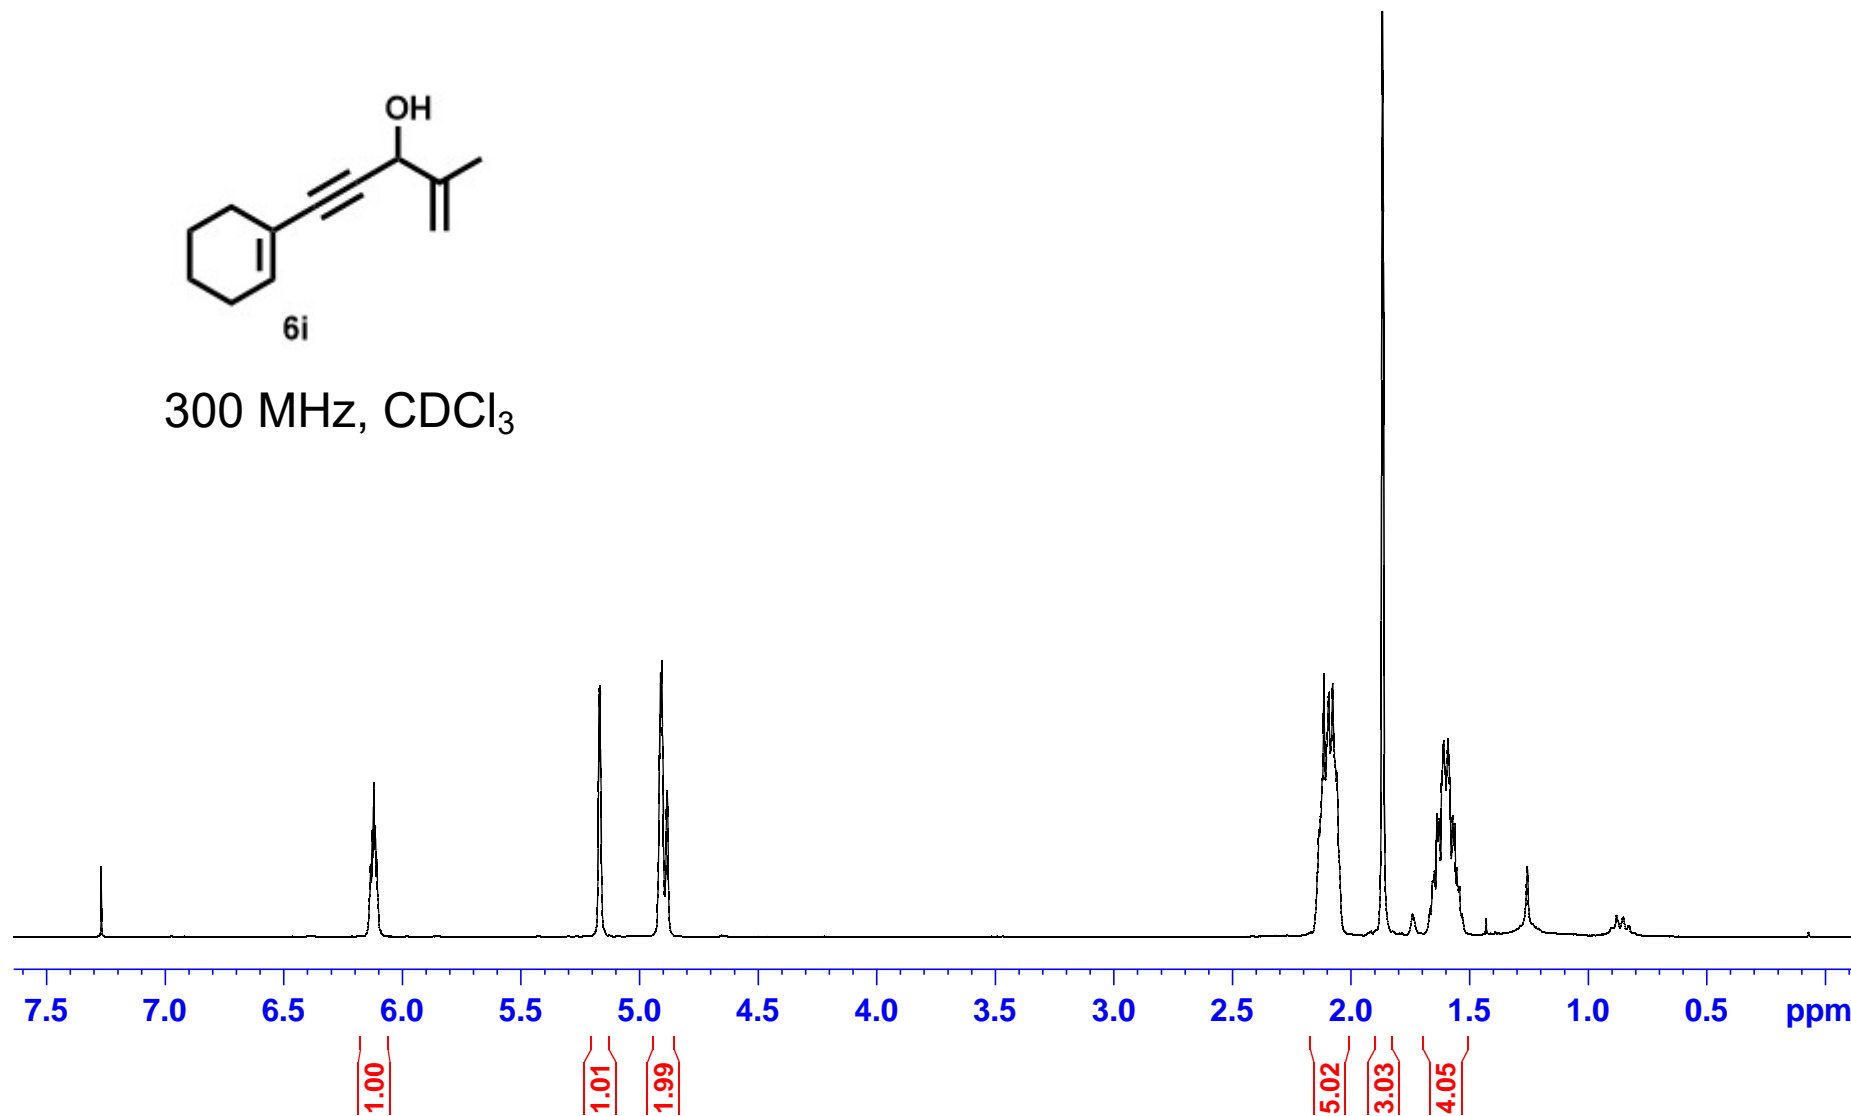

som.06i 3,  $^{13}\text{C}$ , cyclohexenyl-CC-C(OH)-C(Me)=CH<sub>2</sub>, B82, 8/16/21

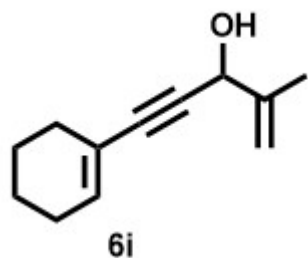

75 MHz, CDCl<sub>3</sub>

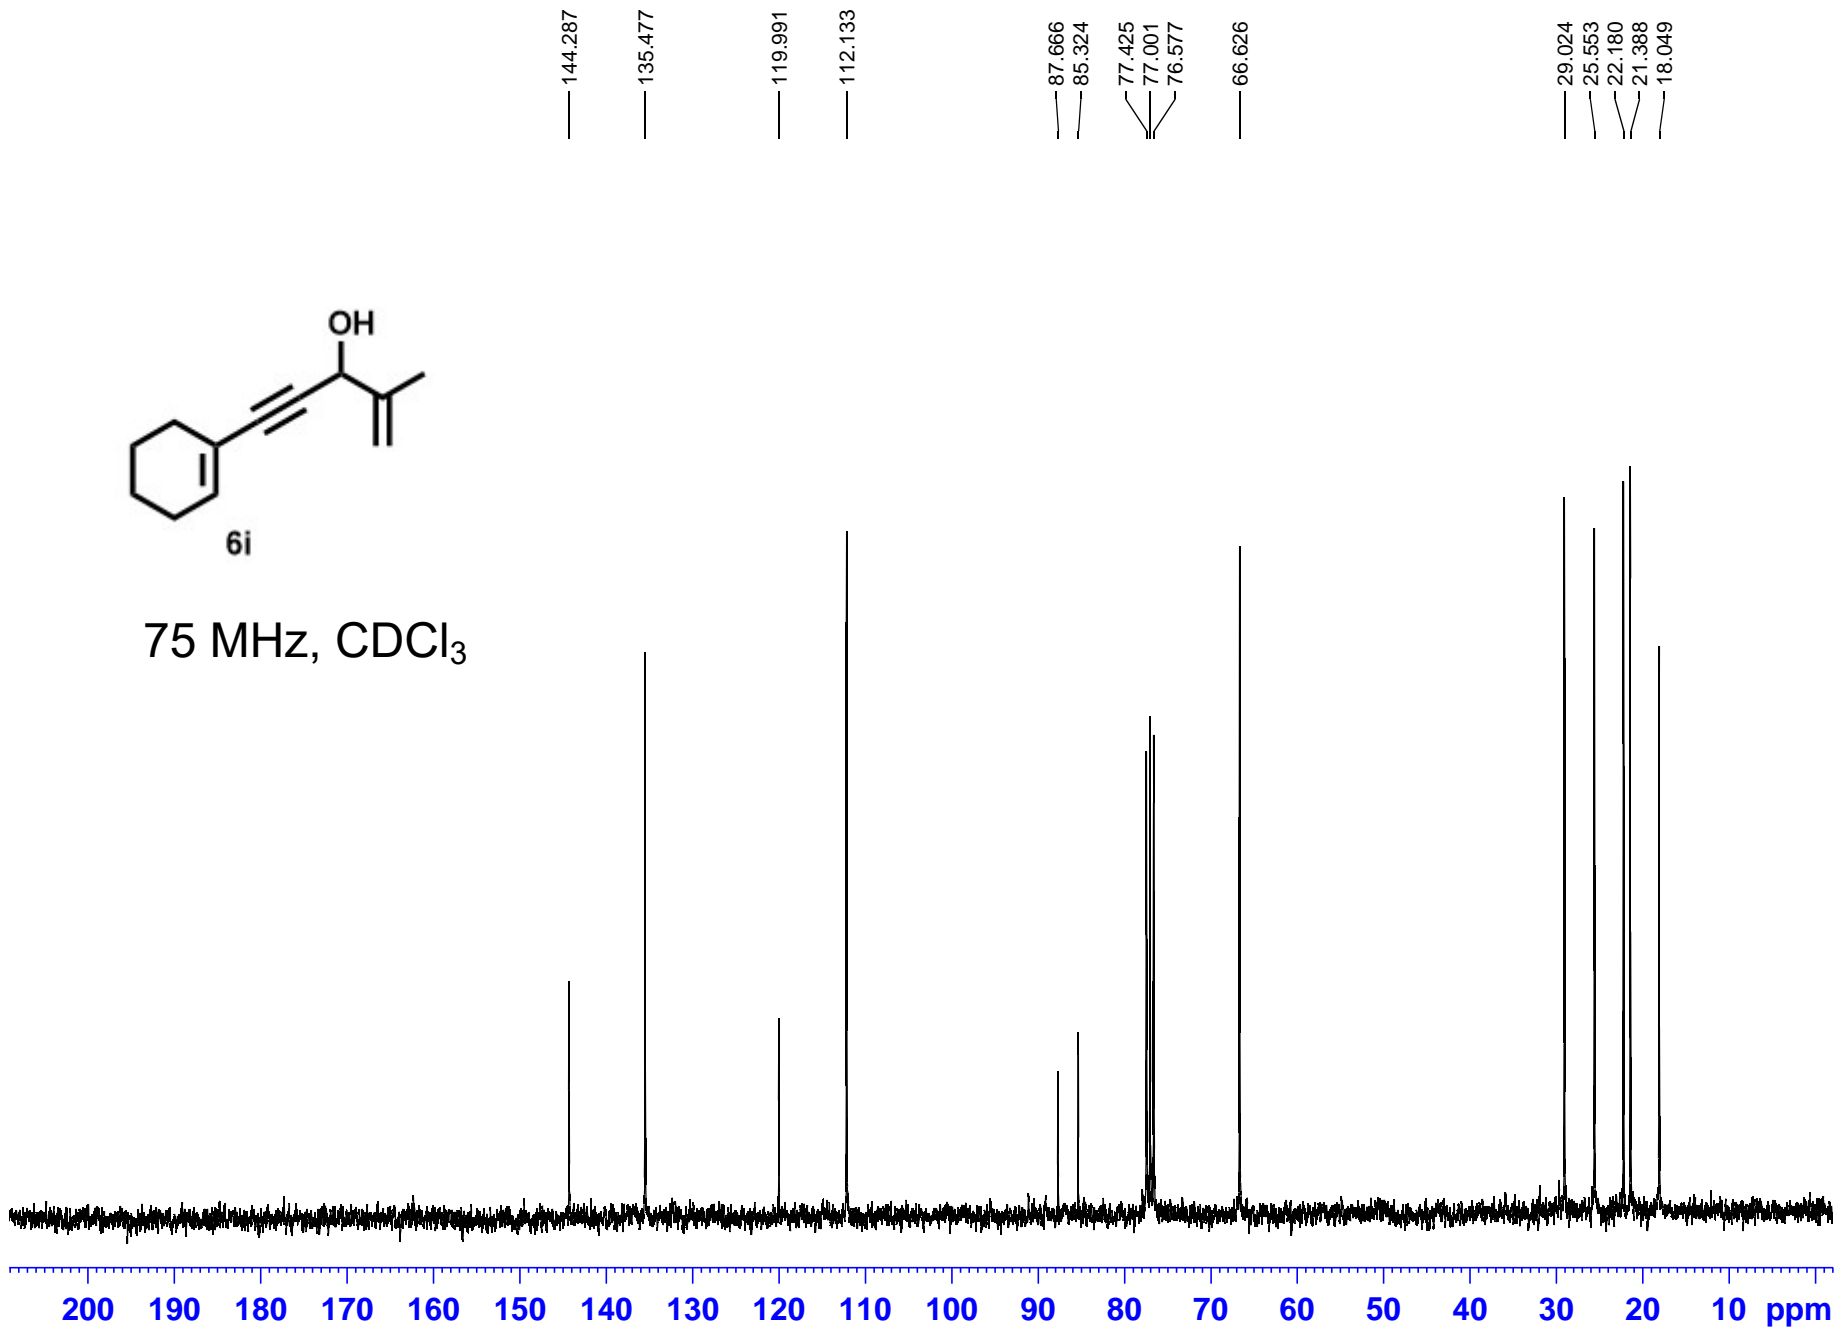

som.06j 1, cyclohexenyl-CC-C(OH)-C(TIPS)=CH<sub>2</sub>, B82 8/10/21

7.270  
6.361  
6.356  
6.350  
6.119  
6.113  
6.106  
6.100  
6.094  
5.568  
5.564  
5.095

2.118  
2.097  
1.818  
1.616  
1.598  
1.294  
1.270  
1.253  
1.244  
1.222  
1.111  
1.088

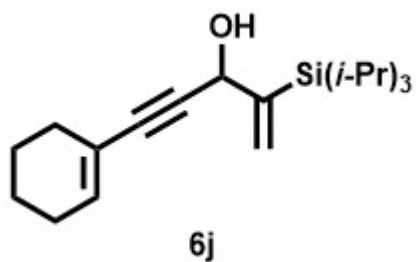

300 MHz, CDCl<sub>3</sub>

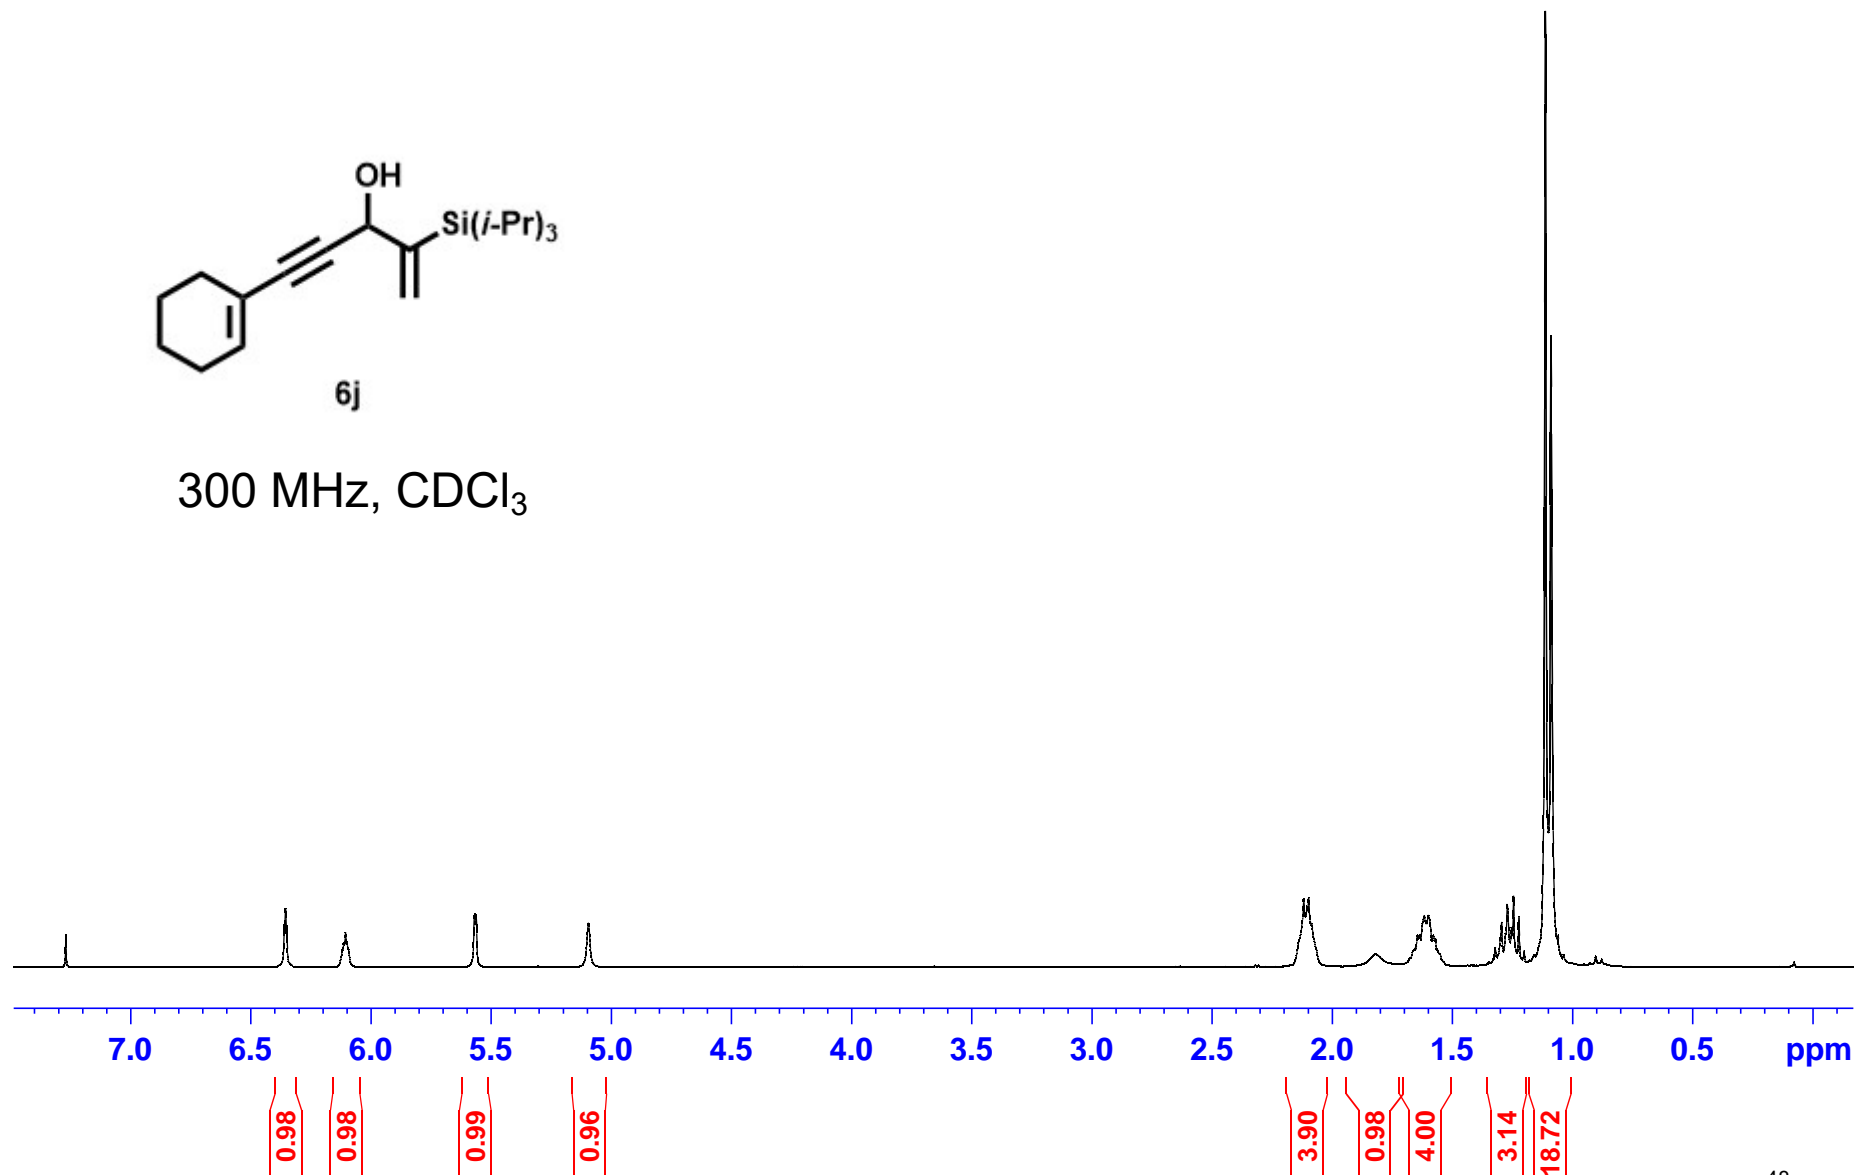



som.06j 2 13C, cyclohexenyl-CC-C(OH)-C(TIPS)=CH2, B82, 8/10/21

146.761  
135.051  
128.624  
120.211  
88.386  
86.450  
77.414  
76.993  
76.569  
65.503  
29.024  
25.587  
22.237  
21.443  
18.766  
11.244

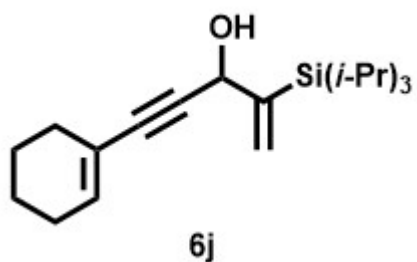

75 MHz, CDCl<sub>3</sub>

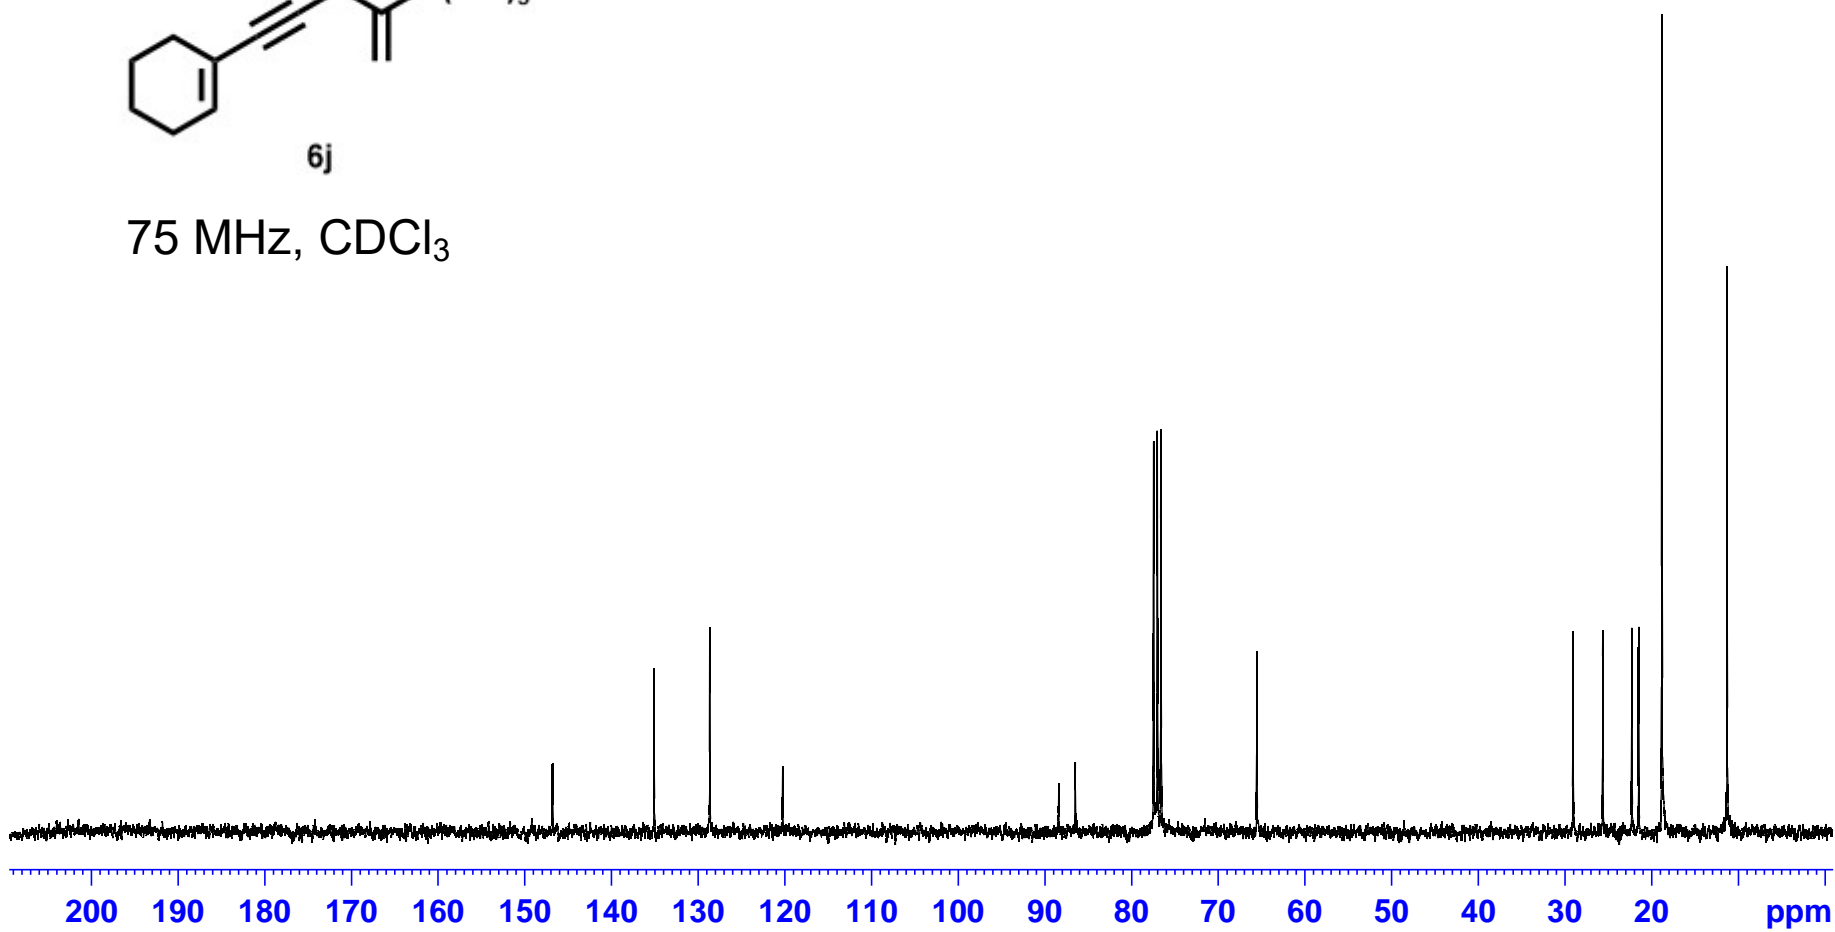

jrg.1459 1, (MeO)<sub>2</sub>Ph-CC-CH(OH)-C(Me)=CHMe, 9/18/21

7.27  
6.60 6.60 6.45 6.44 6.44  
5.78 5.77 5.76 5.74  
4.97  
3.77  
2.32  
1.82 1.68 1.67

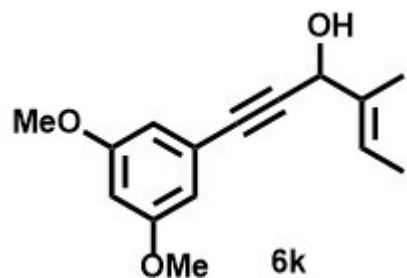

500 MHz, CDCl<sub>3</sub>

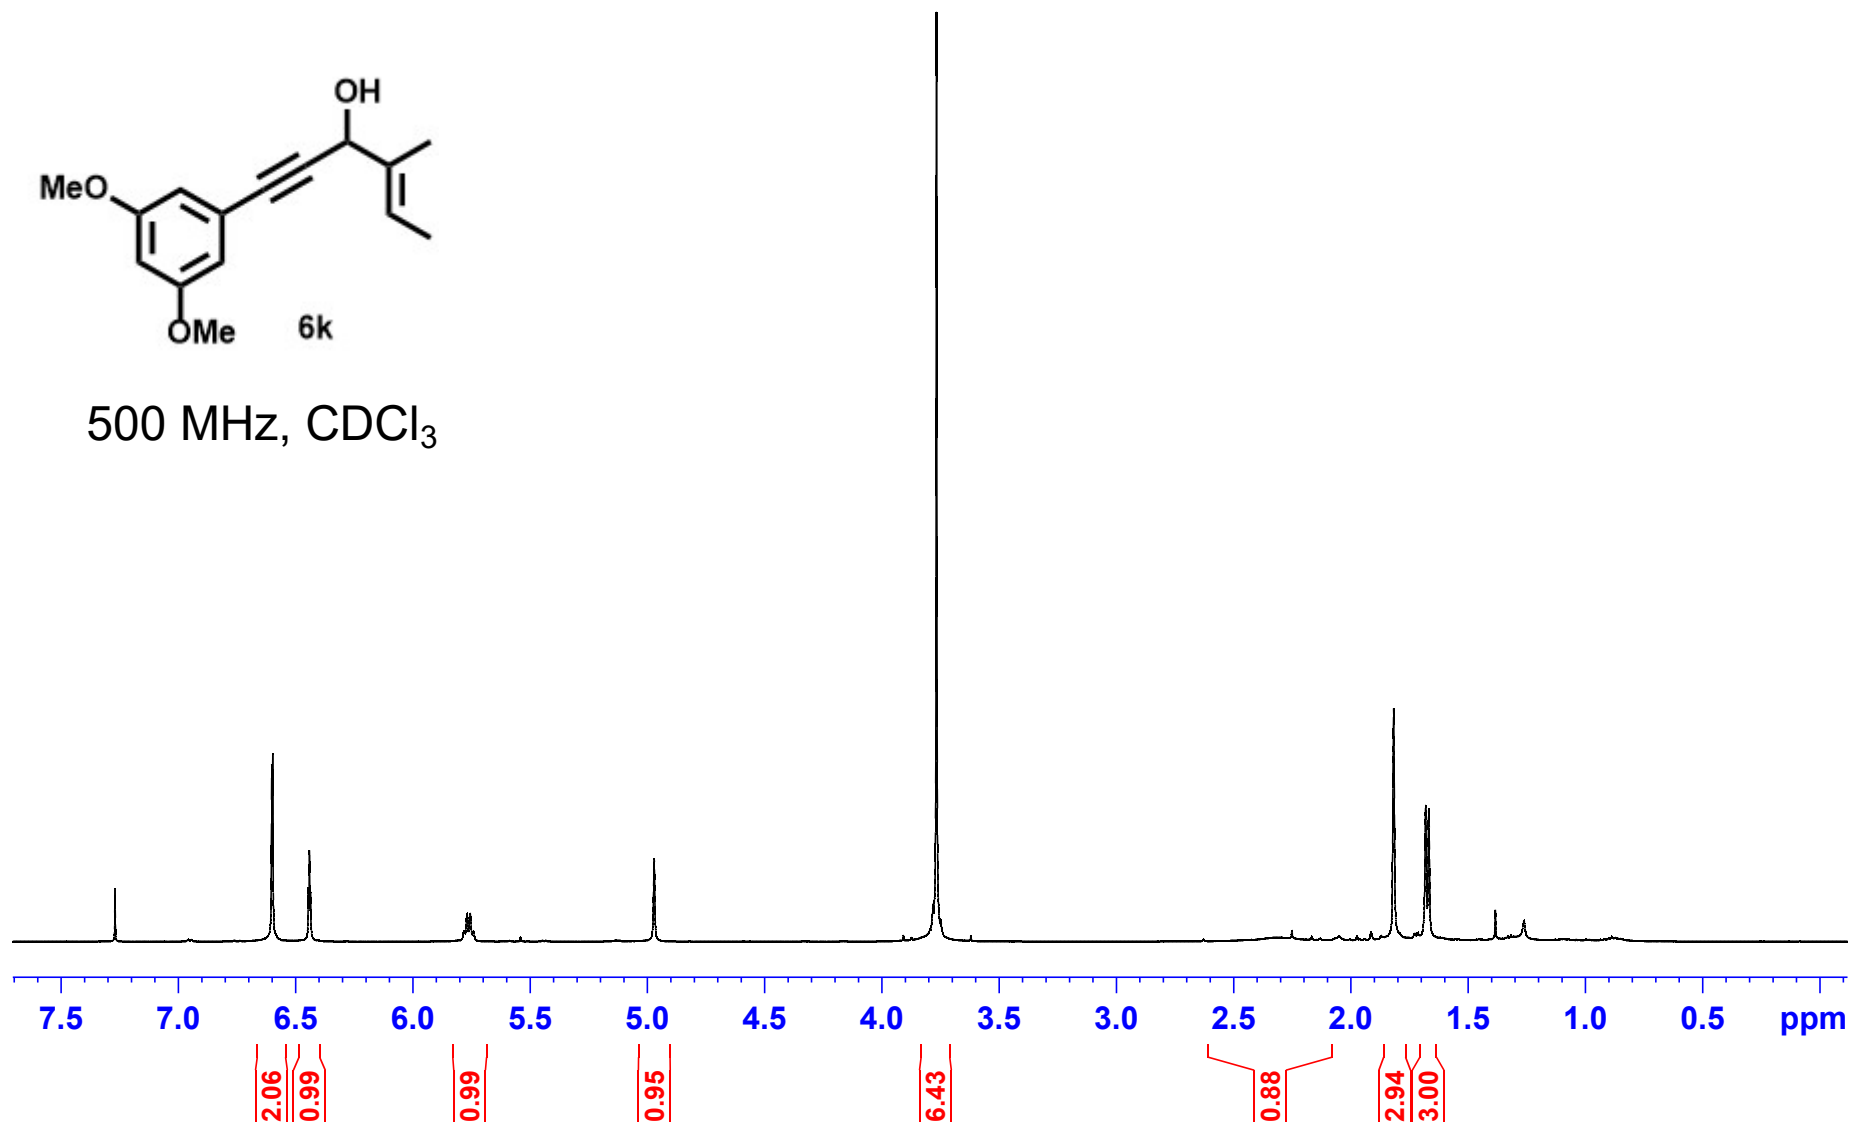

jrg.1459 2, 13C, (MeO)2Ph-CC-CH(OH)-C(Me)=CH(Me), 9/18/21

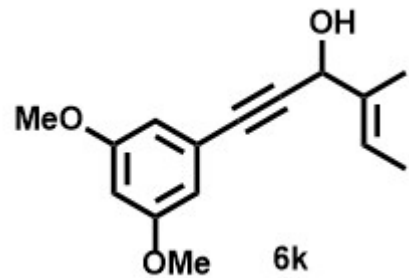

125 MHz, CDCl<sub>3</sub>

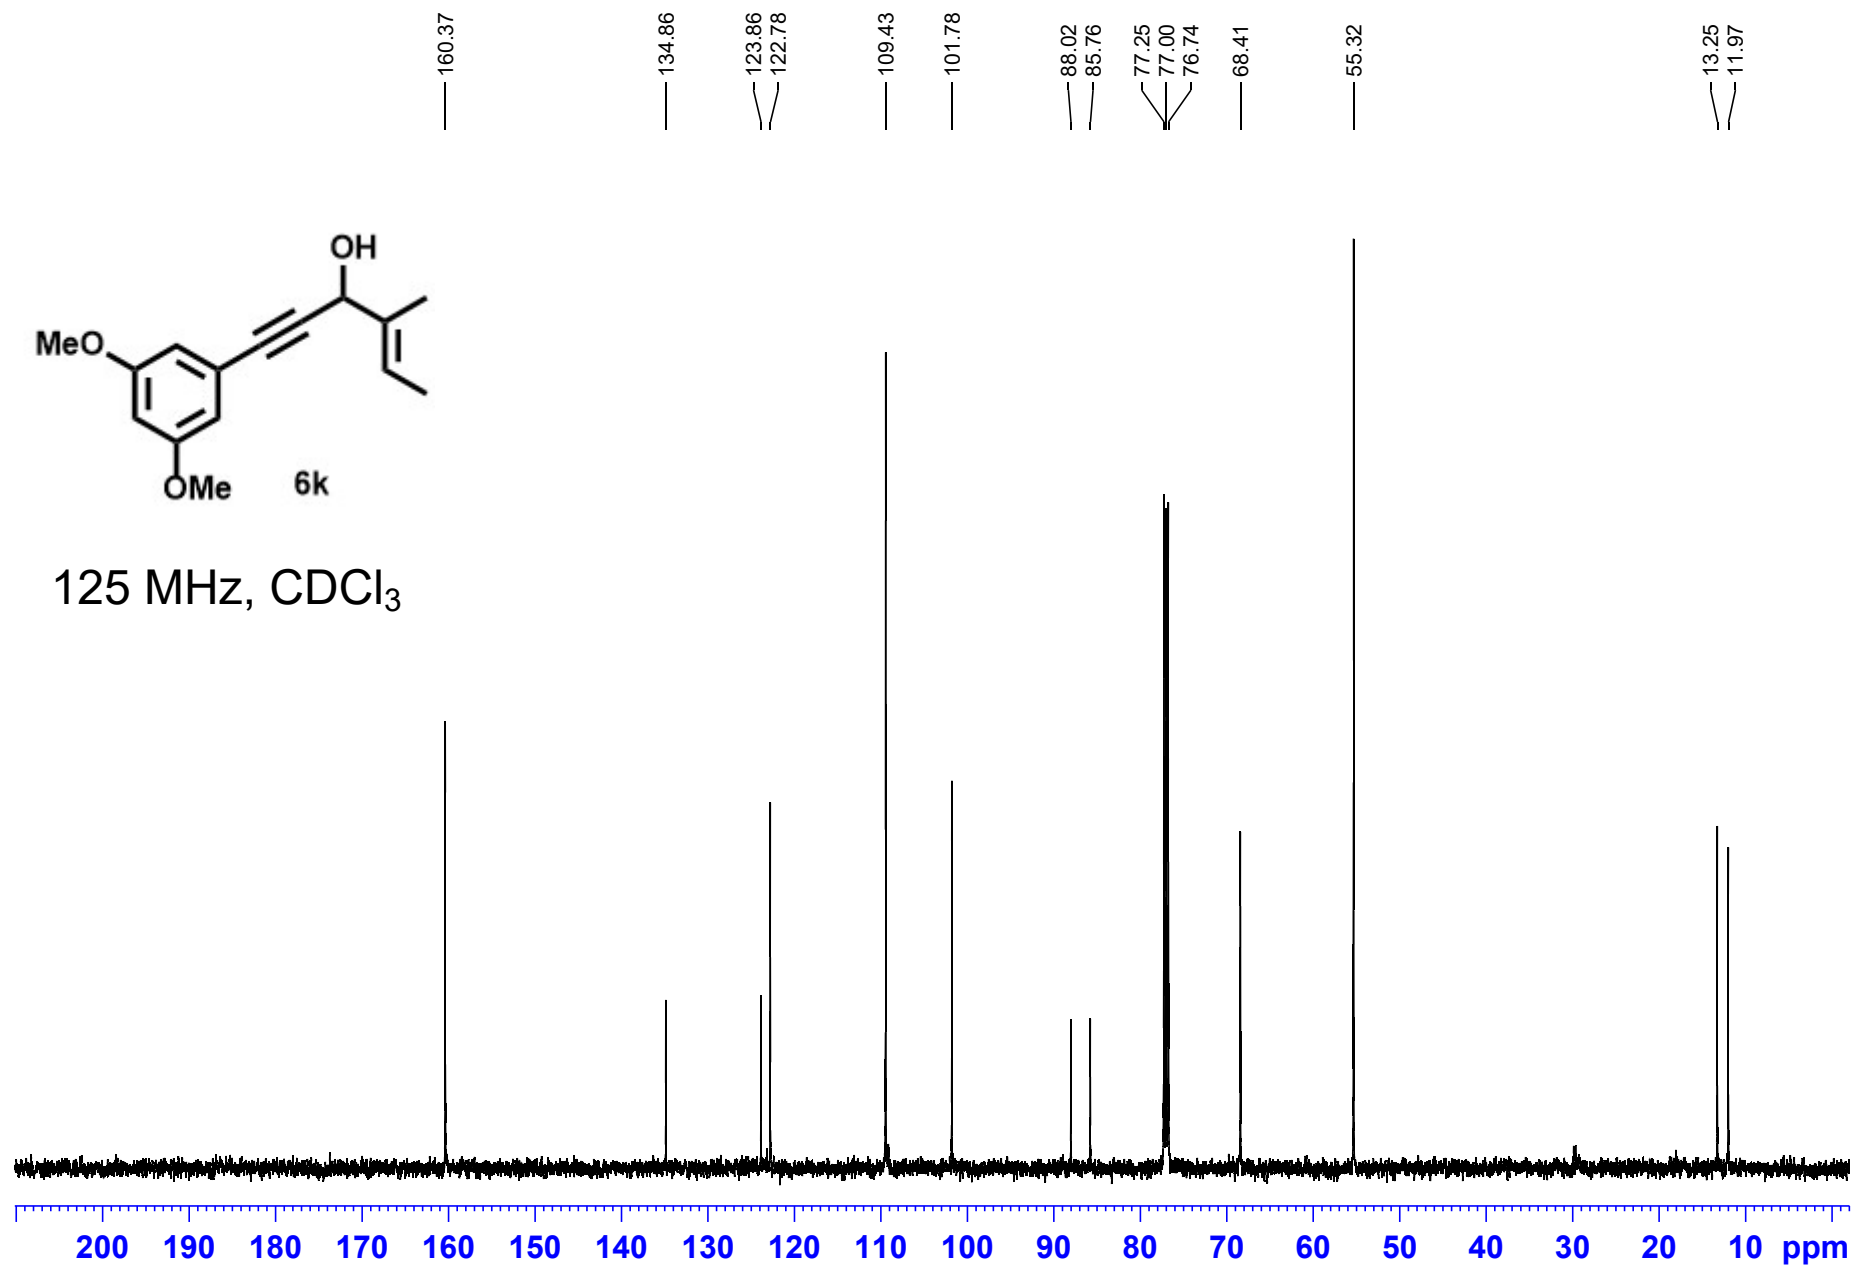

jrg.1448

July 8, 2021

300US

7.303  
7.277  
7.269  
7.212  
7.187  
7.120  
7.113  
7.029  
7.021  
7.001  
6.993  
6.555  
6.098

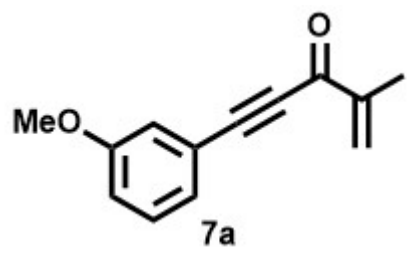

300 MHz, CDCl<sub>3</sub>

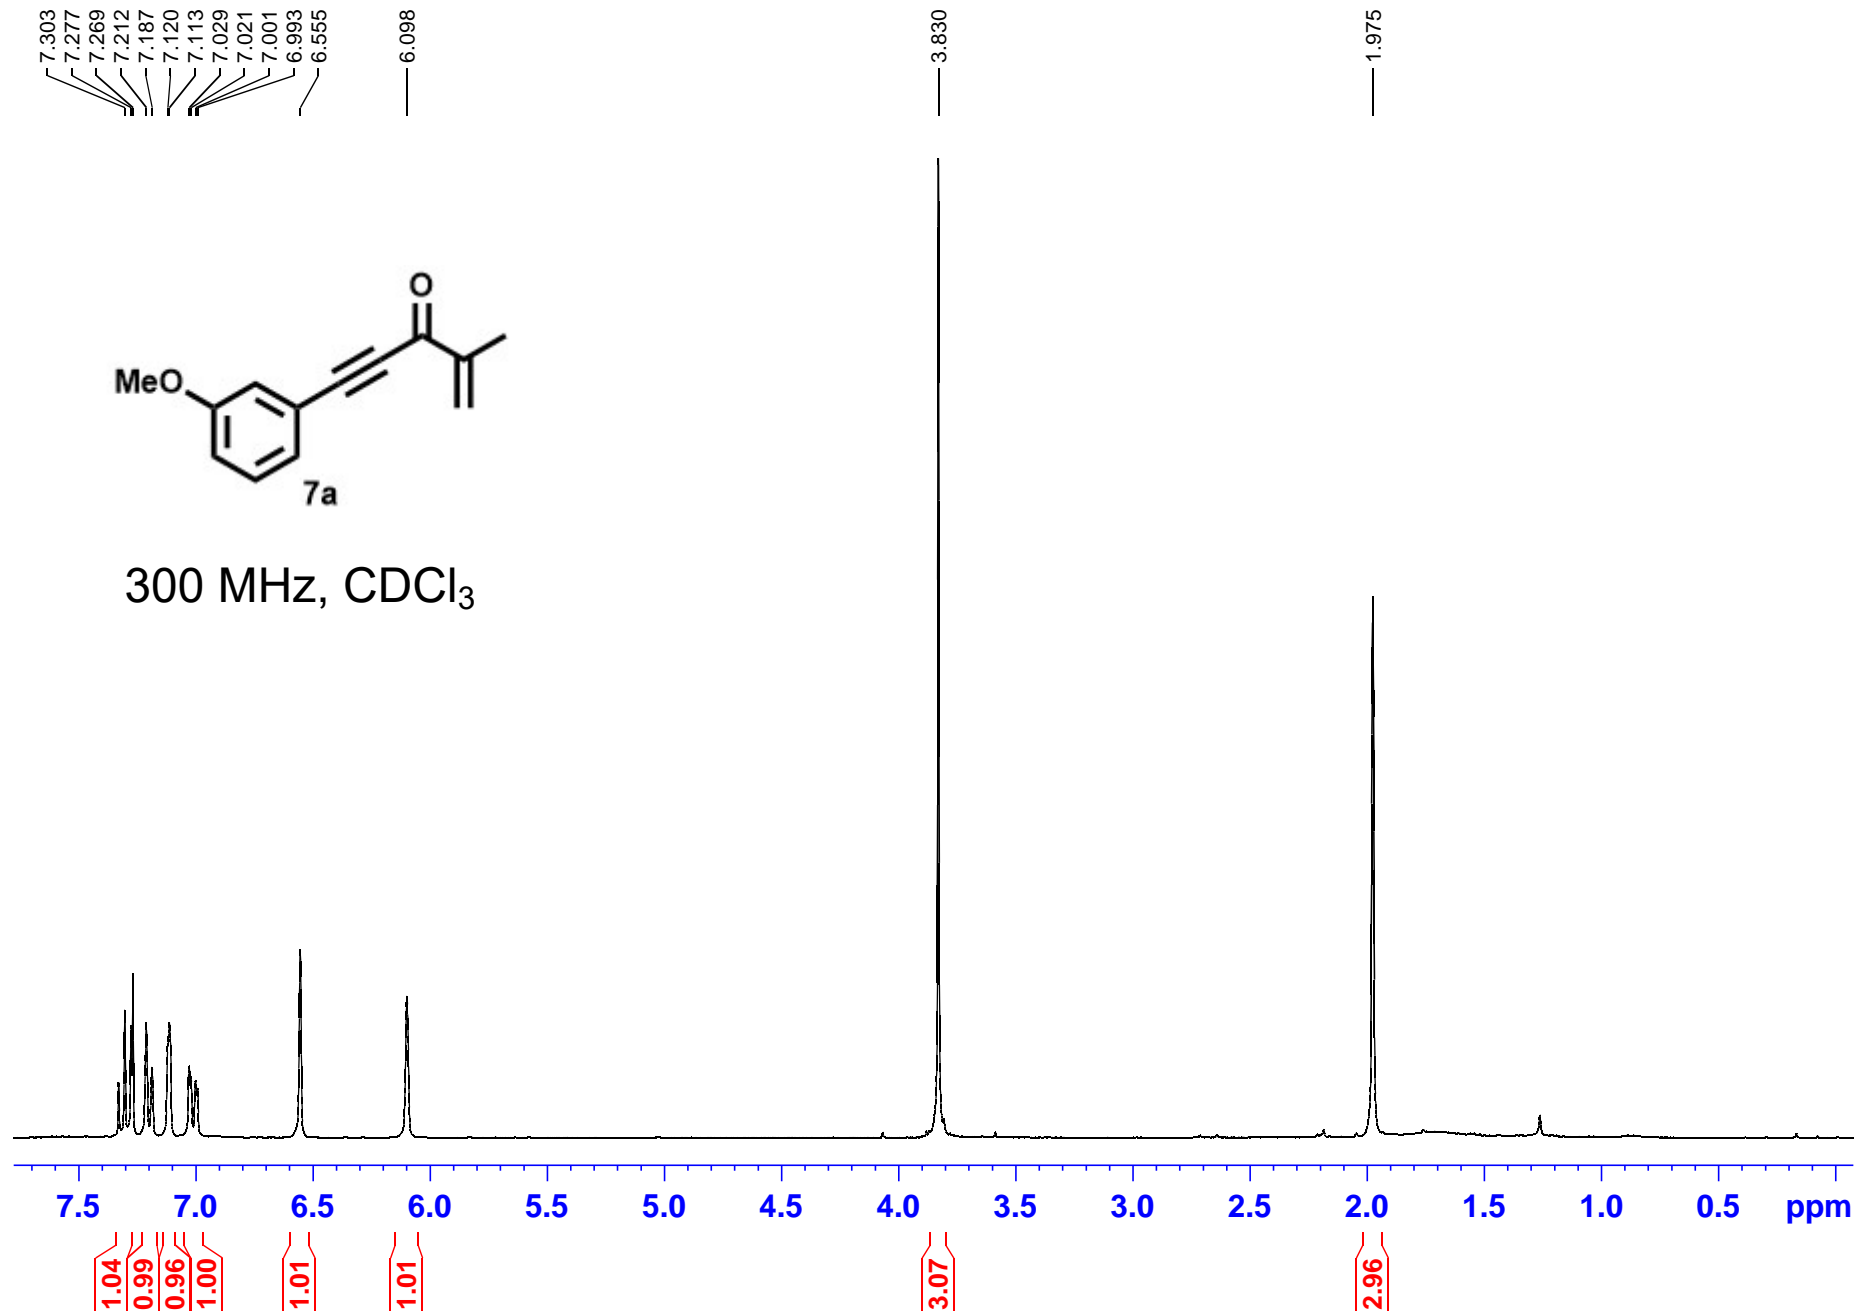

jrg.1448 2, 13C, 3-MeOPh-CC-methacol ketone, 300 B82, 7/8/21

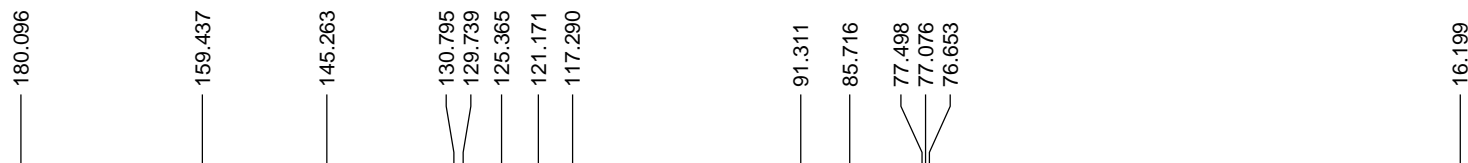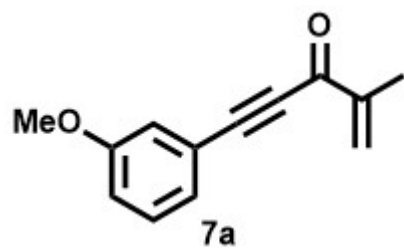

75 MHz, CDCl<sub>3</sub>

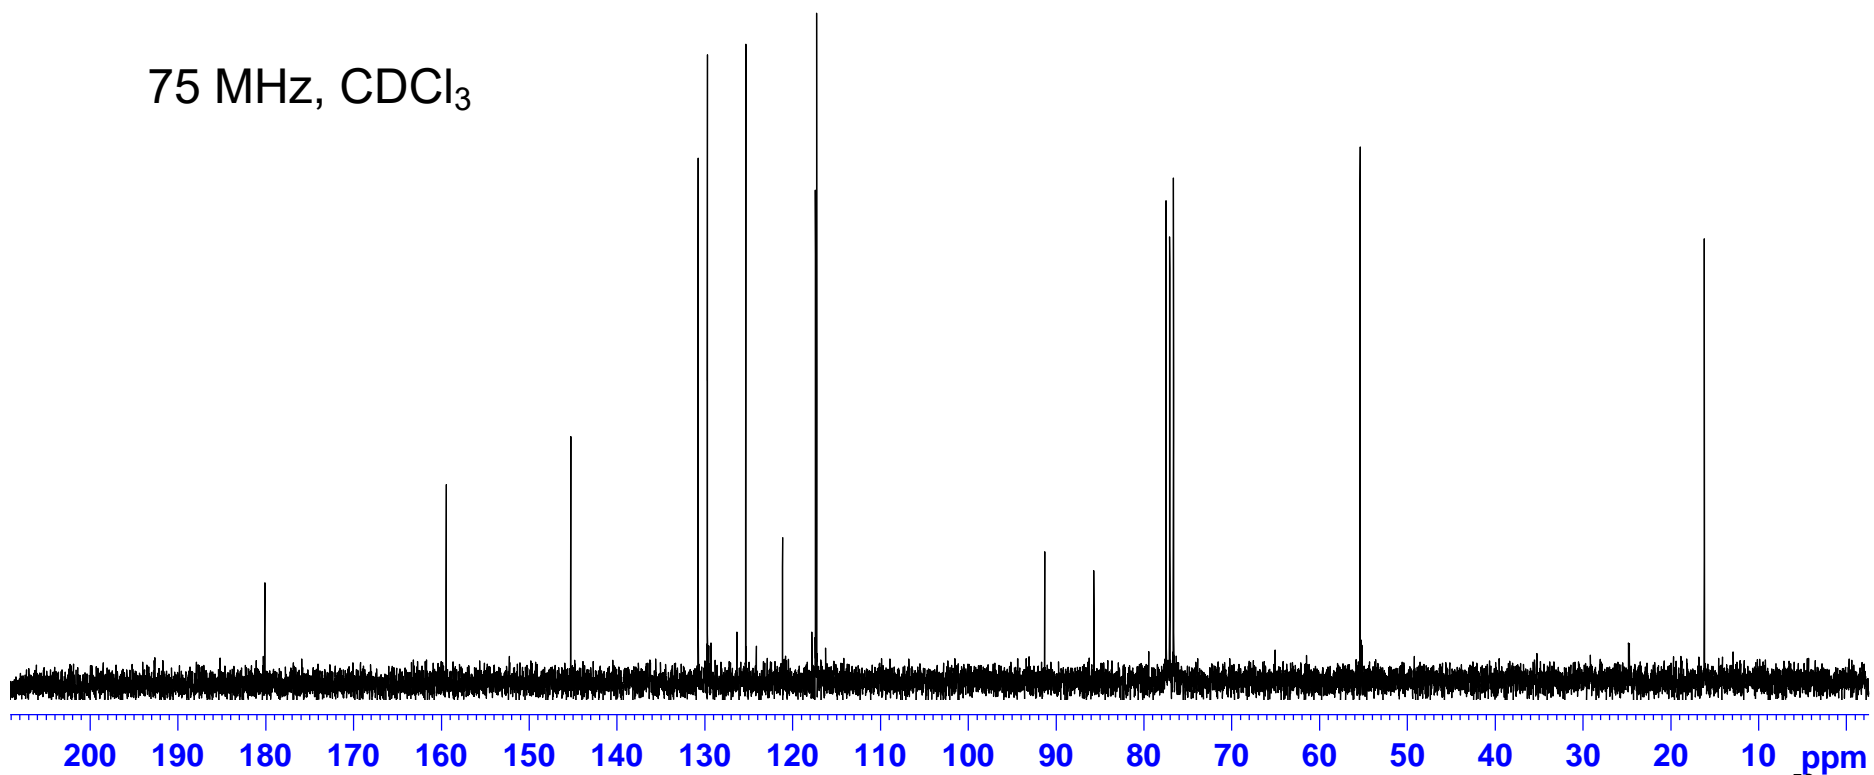

project4\_trimethoxy\_PDC\_ox\_crude  
1D 1H  
DPX300

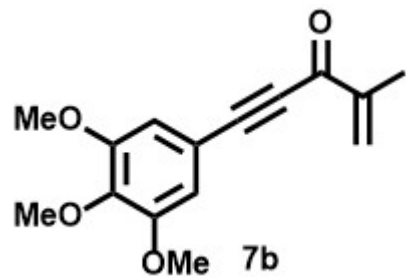

300 MHz, CDCl<sub>3</sub>

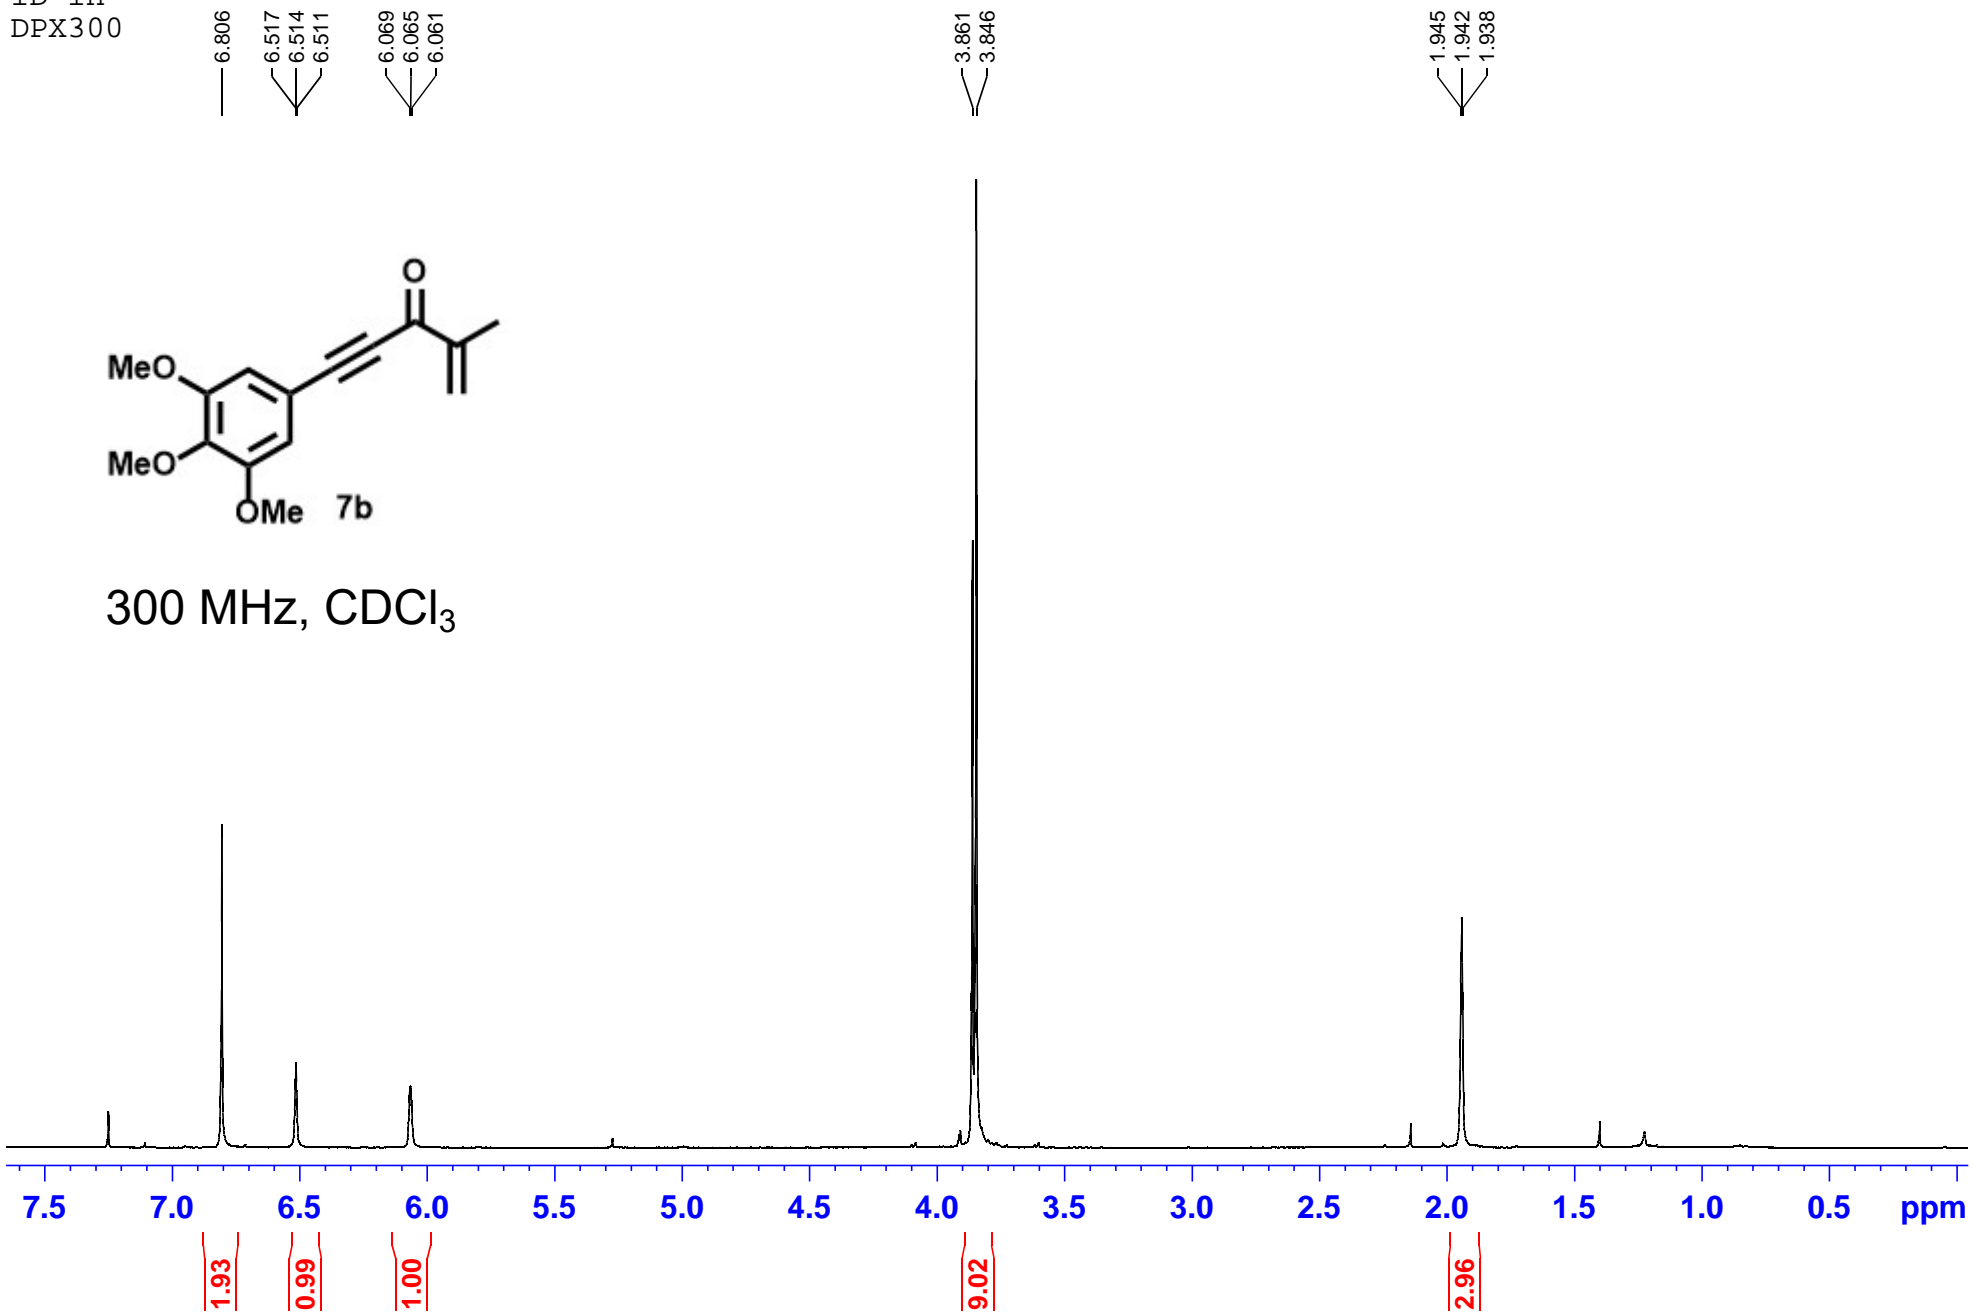

project4\_trimethoxy\_PDC\_ox\_C13  
300US

180.193  
153.312  
145.343  
140.906  
130.832  
115.005  
110.300  
91.937  
85.546  
61.146  
56.377  
16.339

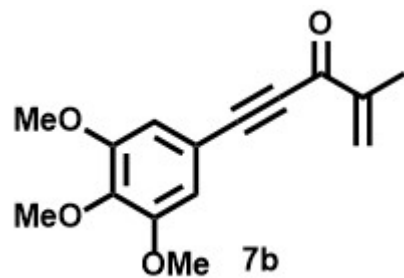

75 MHz, CDCl<sub>3</sub>

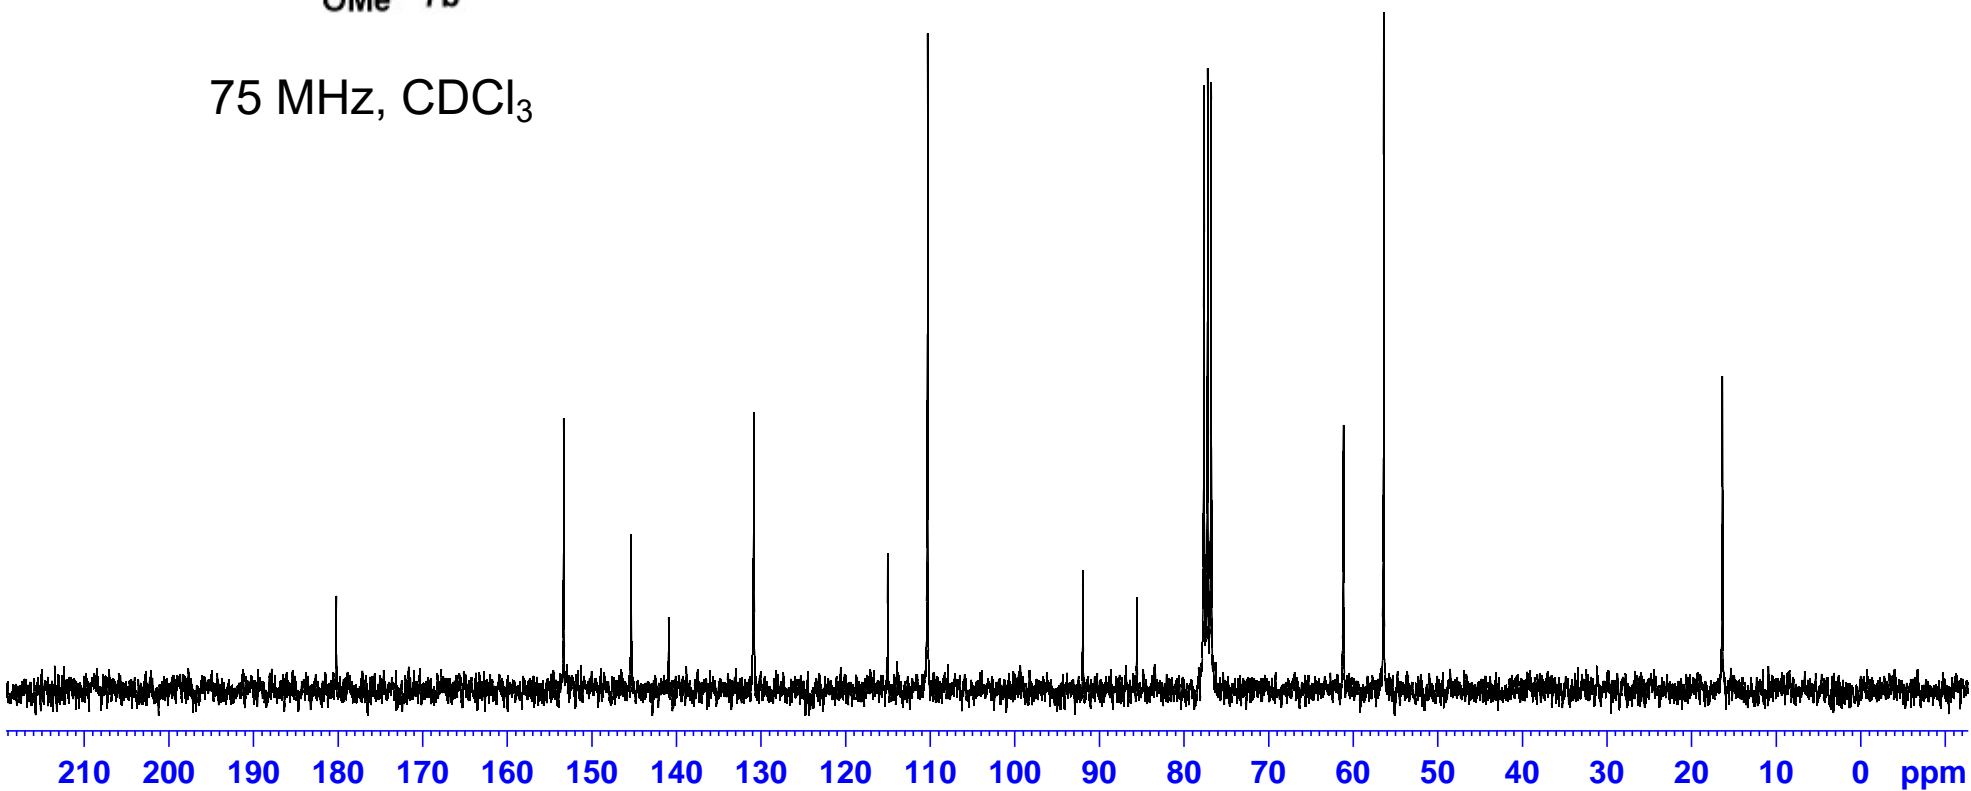

Project2\_P4\_PDC\_PURE  
1D 1H  
DPX300

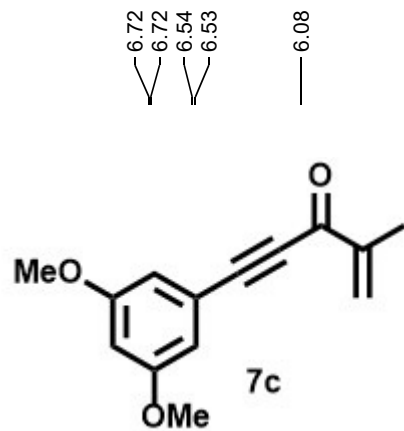

300 MHz, CDCl<sub>3</sub>

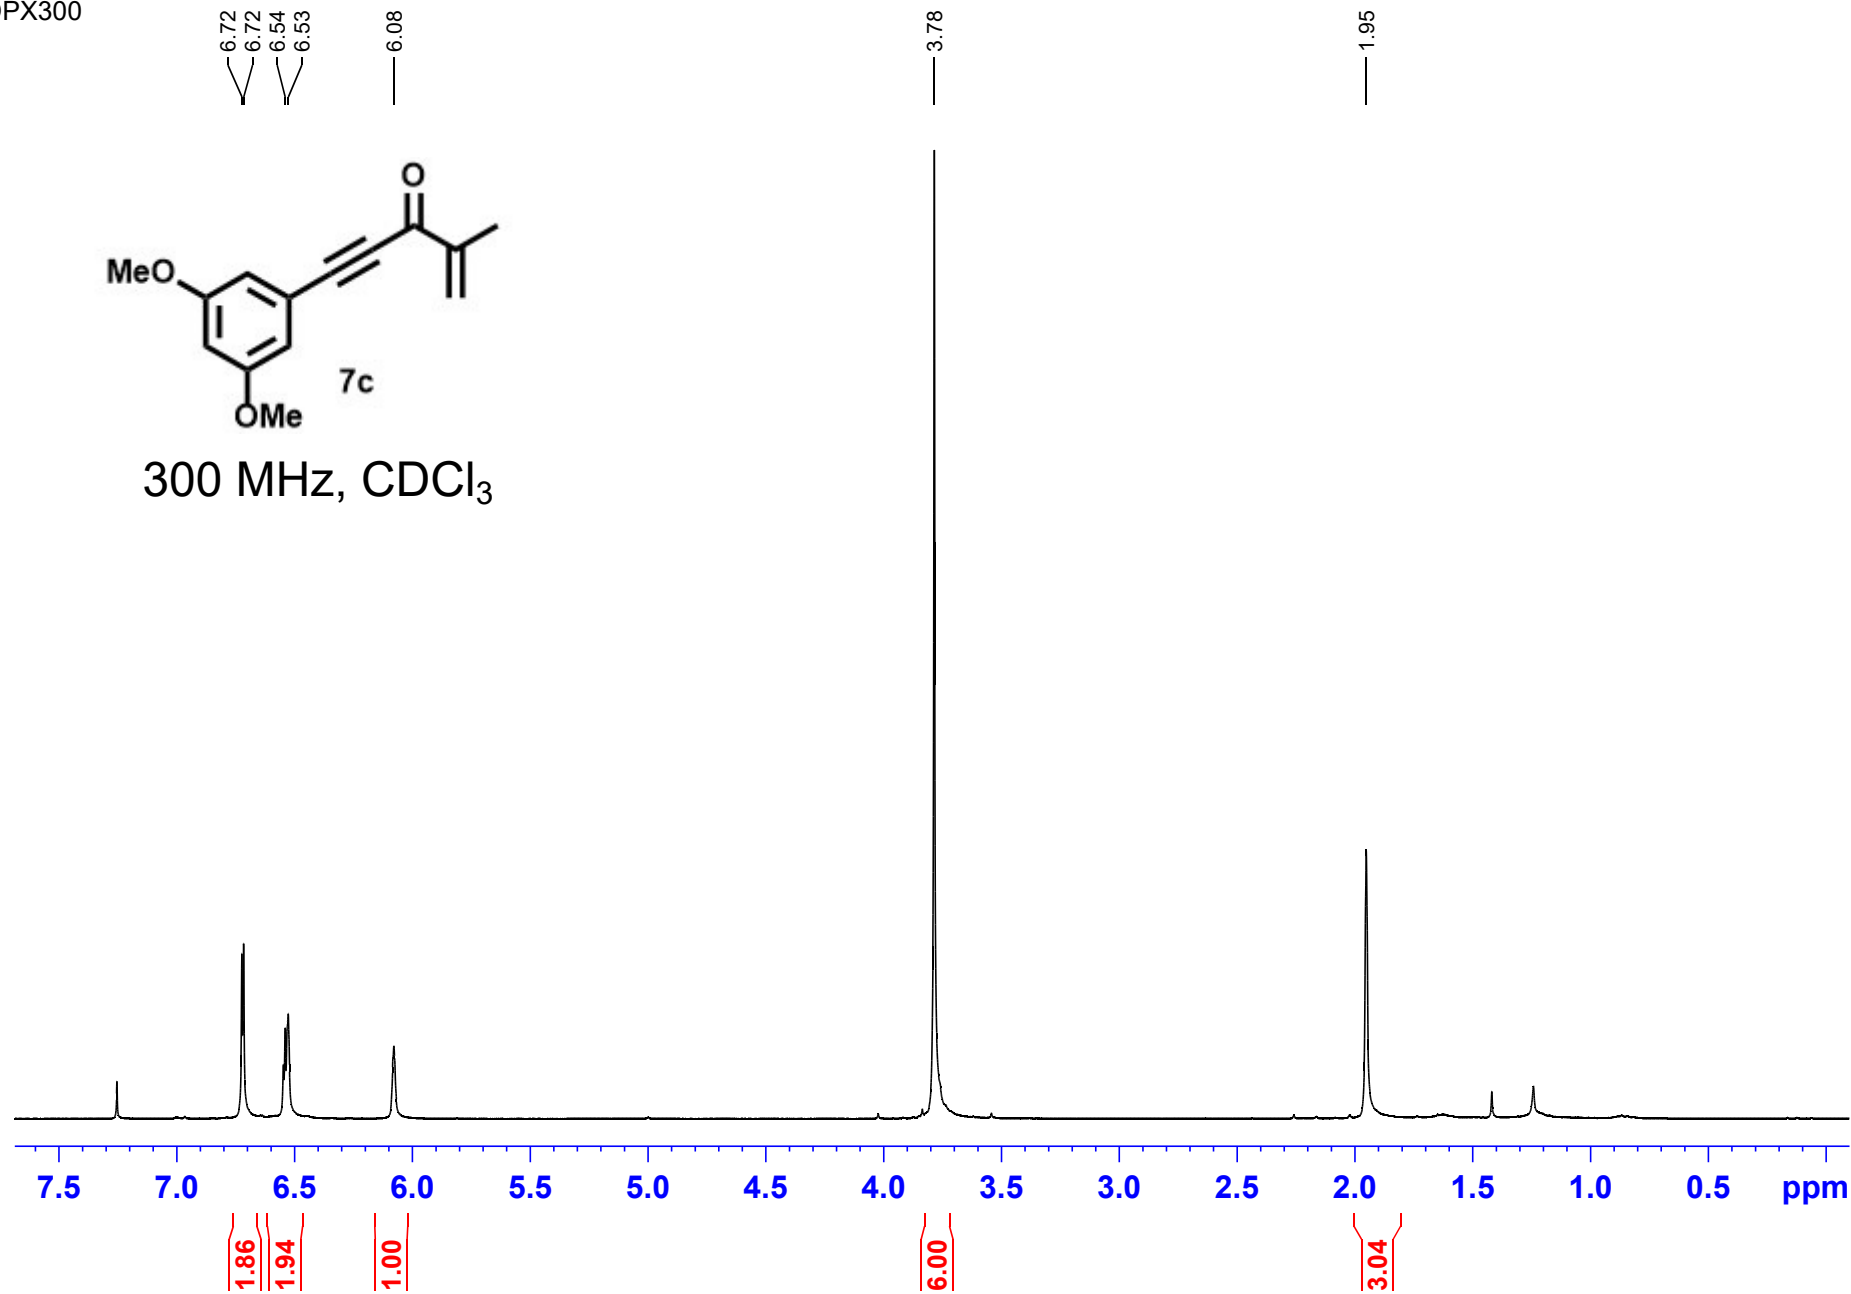



Project2\_P4\_PDC\_C13  
standard 1D 13C experiment  
DPX300

180.283

160.932

145.513

130.987

121.702

110.764

104.219

91.587

85.604

55.786

16.413

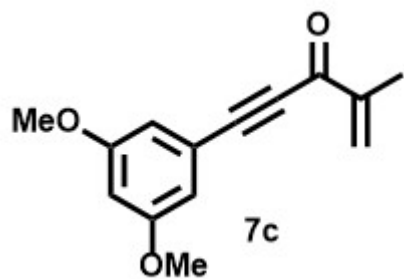

75 MHz, CDCl<sub>3</sub>

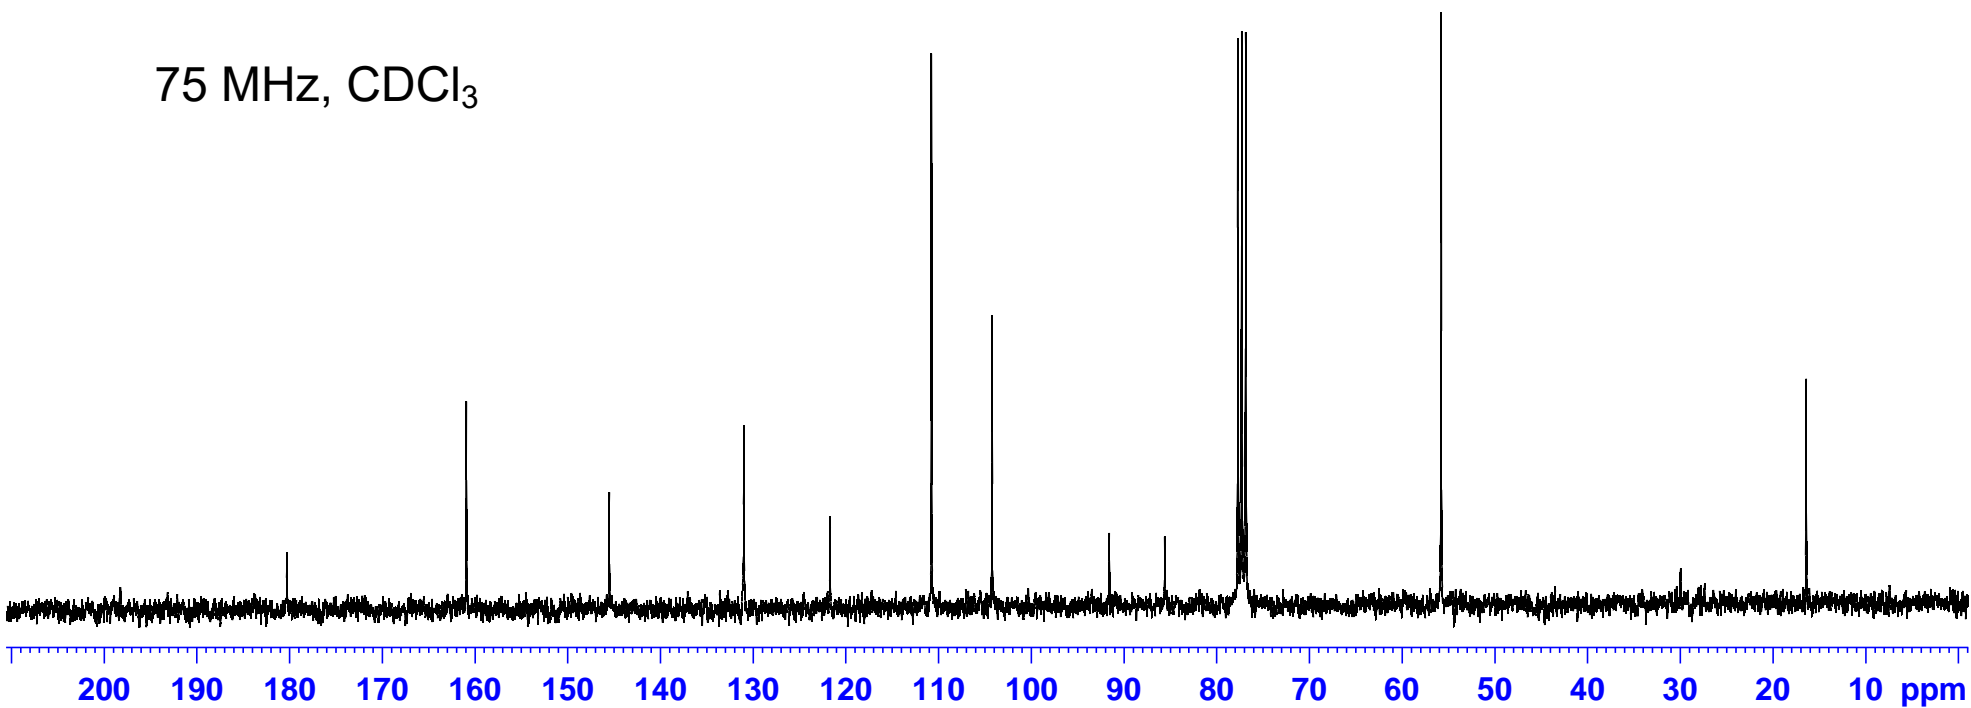

project4\_pyrrol\_ox\_PDC\_H1

300US

7.612  
7.346  
7.343  
7.327  
7.323  
7.299  
7.258  
7.179  
7.173  
7.159  
7.153  
7.146  
7.133  
7.126  
7.075  
6.535  
6.105

3.878

1.998

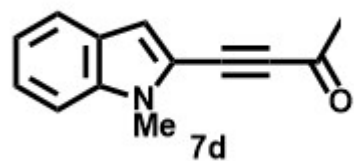

300 MHz, CDCl<sub>3</sub>

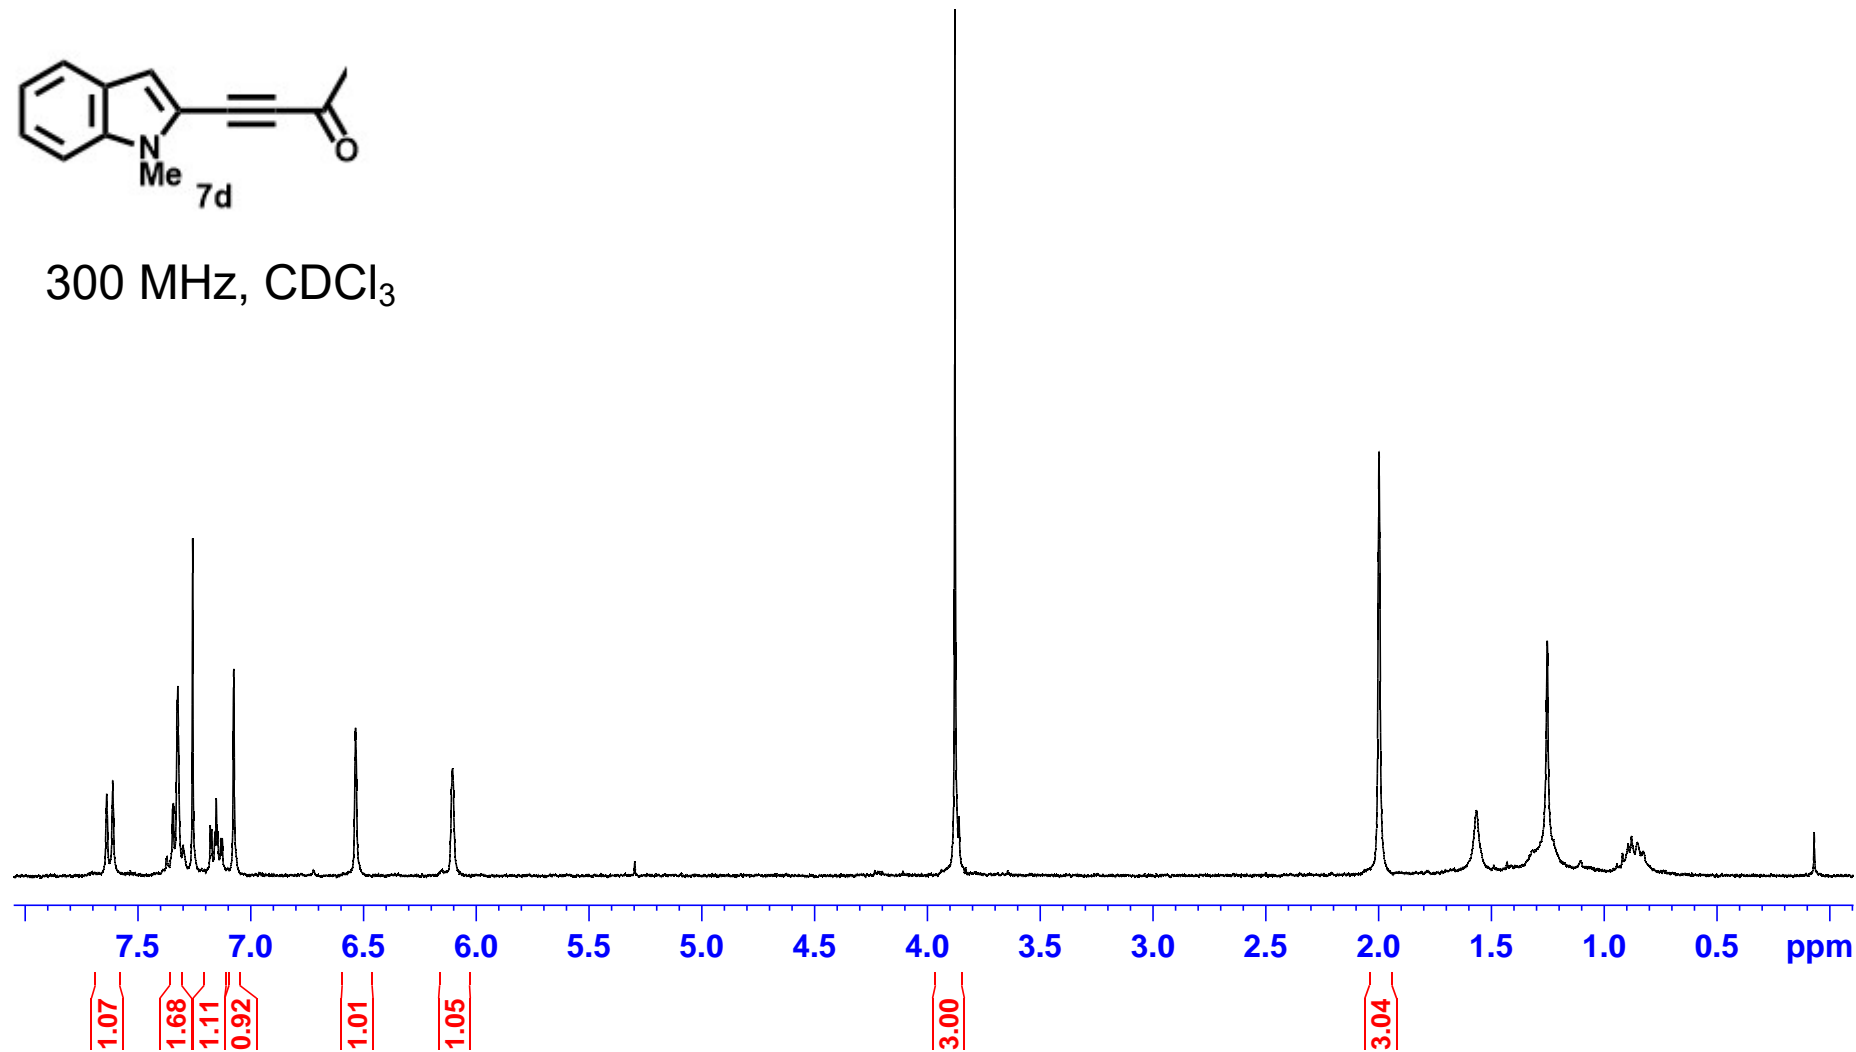

indole\_cc\_CO\_ox\_metha\_c13  
300US

— 179.528  
— 145.364  
— 138.407  
— 130.253  
— 127.002  
— 124.959  
— 121.885  
— 120.854  
— 118.985  
— 112.672  
— 109.939  
— 93.484  
— 84.157  
— 31.051  
— 16.414

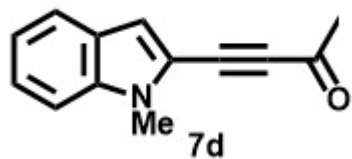

75 MHz, CDCl<sub>3</sub>

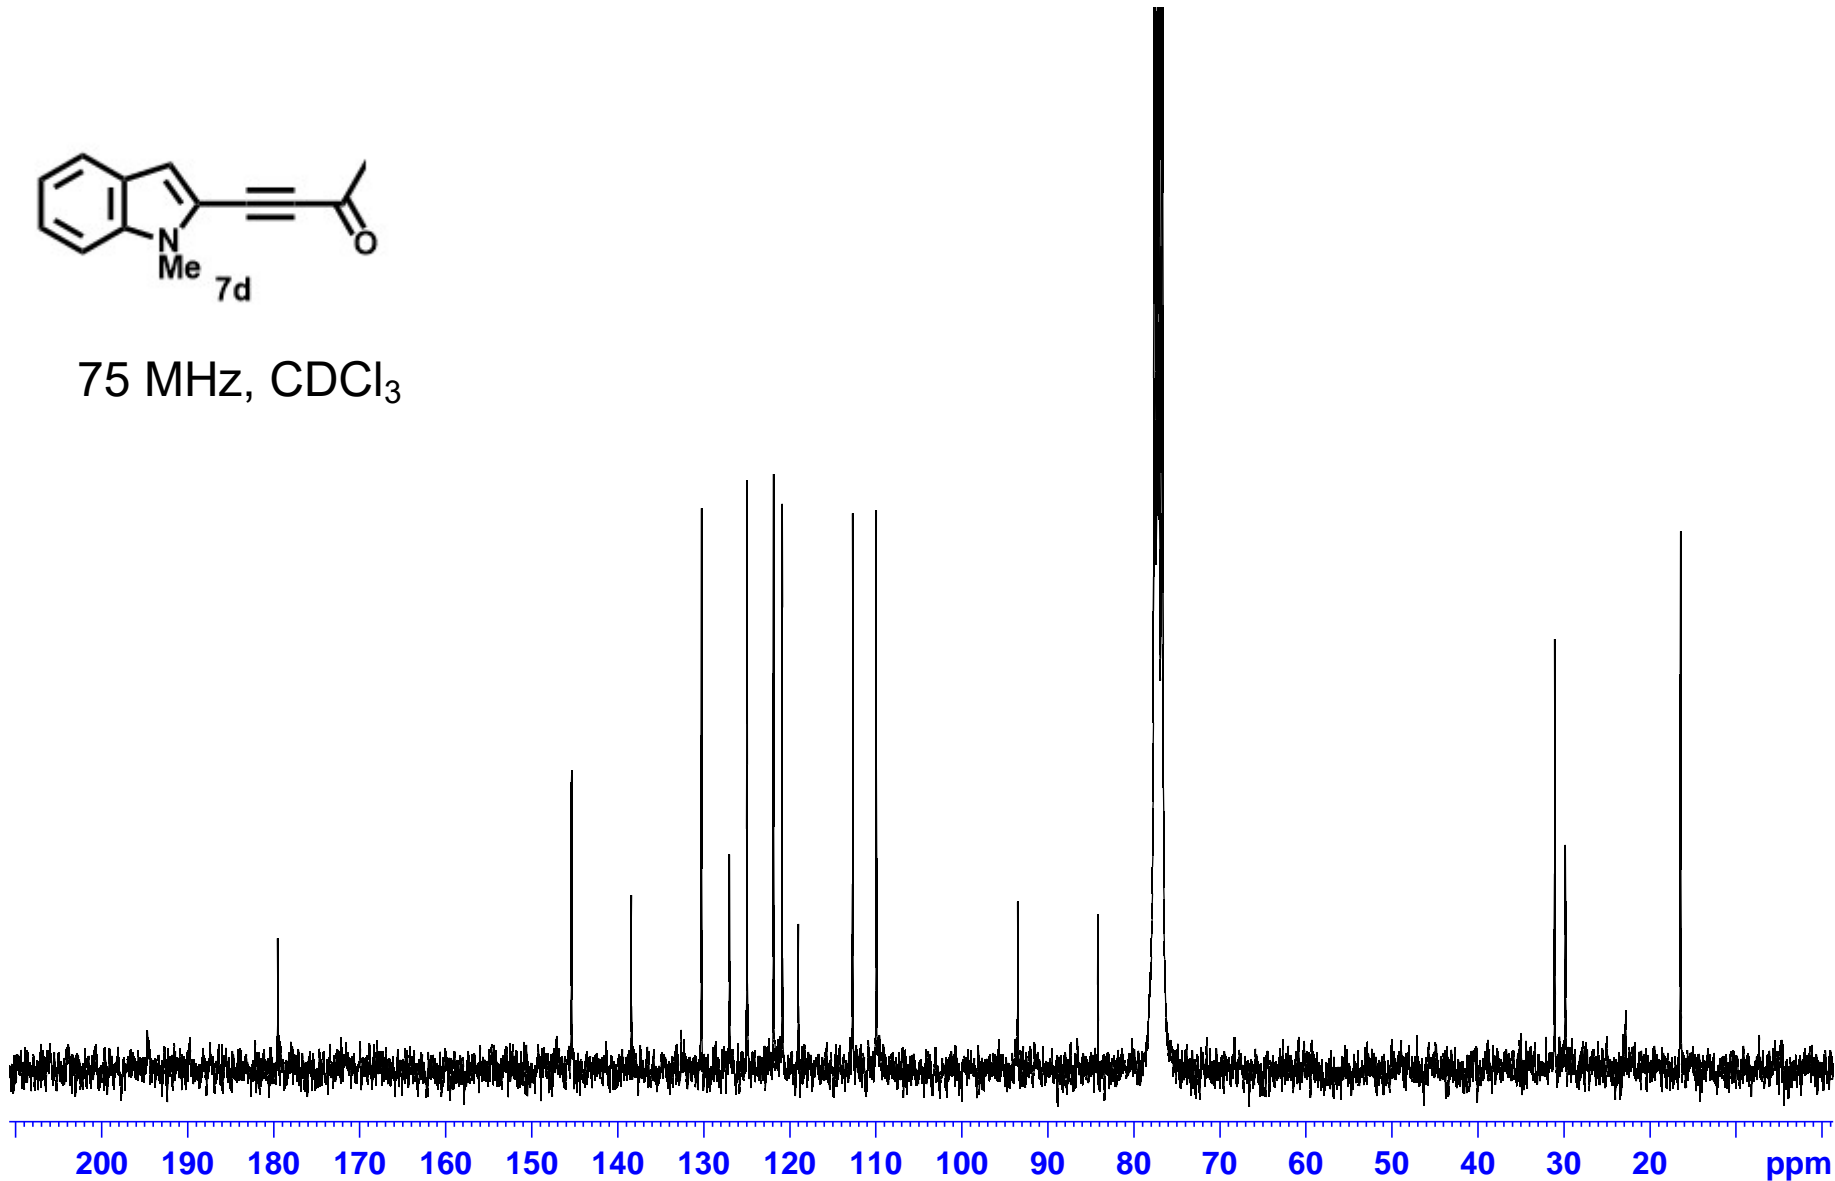

2MeO\_cc\_ketone\_ethyl  
300US

6.74  
6.73  
6.57  
6.56  
6.55  
6.54  
6.04

3.80

2.42  
2.39  
2.37  
2.34

1.12  
1.10  
1.07

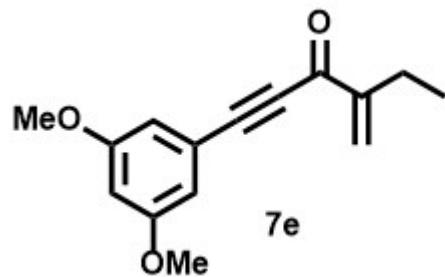

300 MHz, CDCl<sub>3</sub>

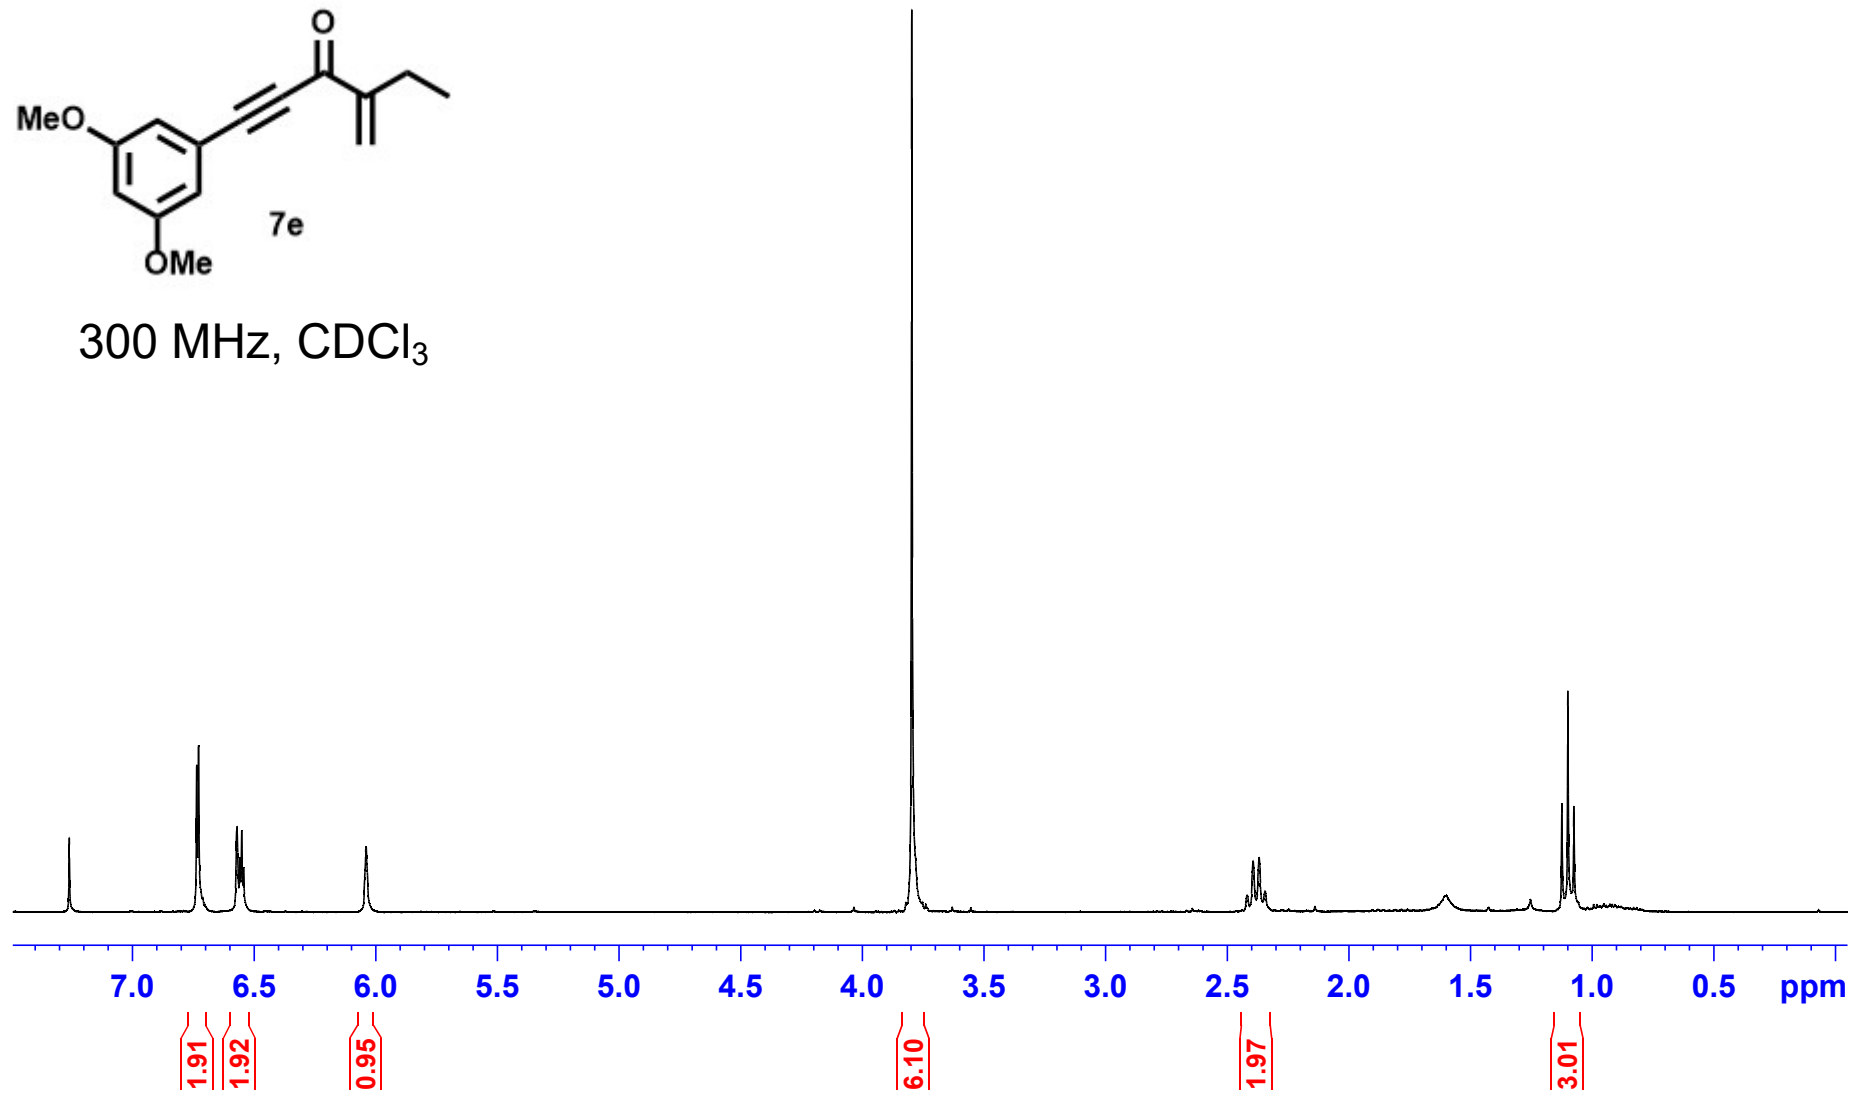

2MeO\_cc\_ketone\_ethyl\_c13  
300US

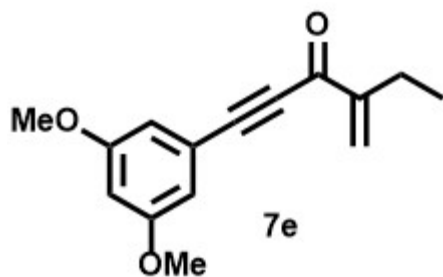

75 MHz, CDCl<sub>3</sub>

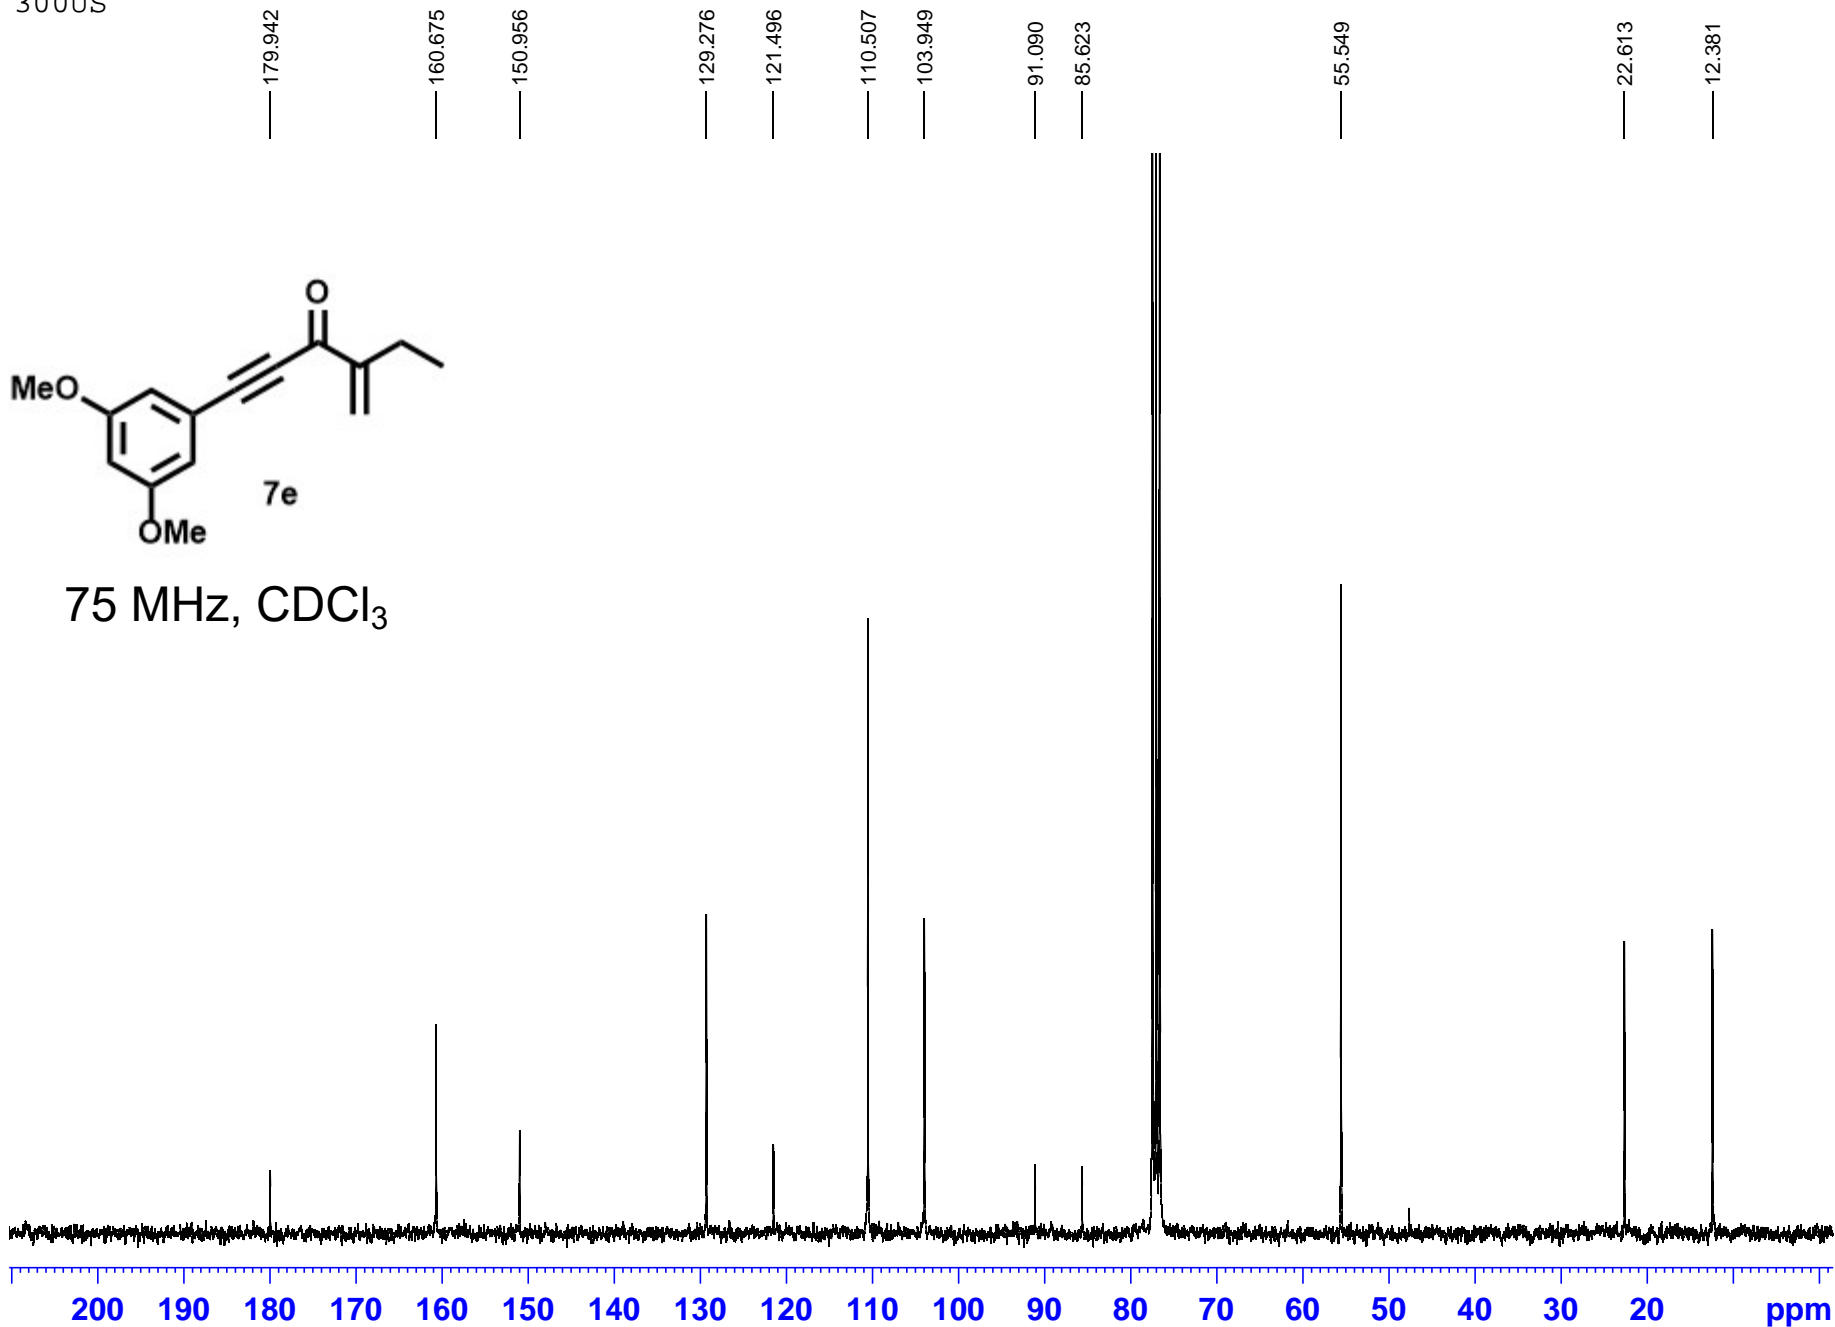

2MeO\_cc\_Ox\_Bn\_H1\_proton

1D 1H

DPX300

7.290  
7.260  
7.251  
7.247  
7.226  
7.220  
7.199  
6.723  
6.715  
6.654  
6.559  
6.552  
6.544  
5.903

3.789  
3.688

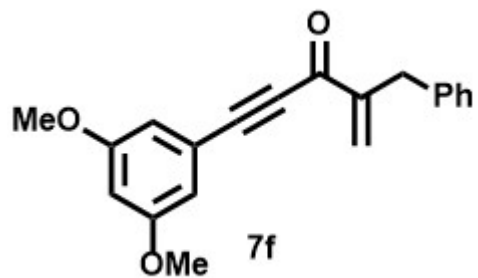

300 MHz, CDCl<sub>3</sub>

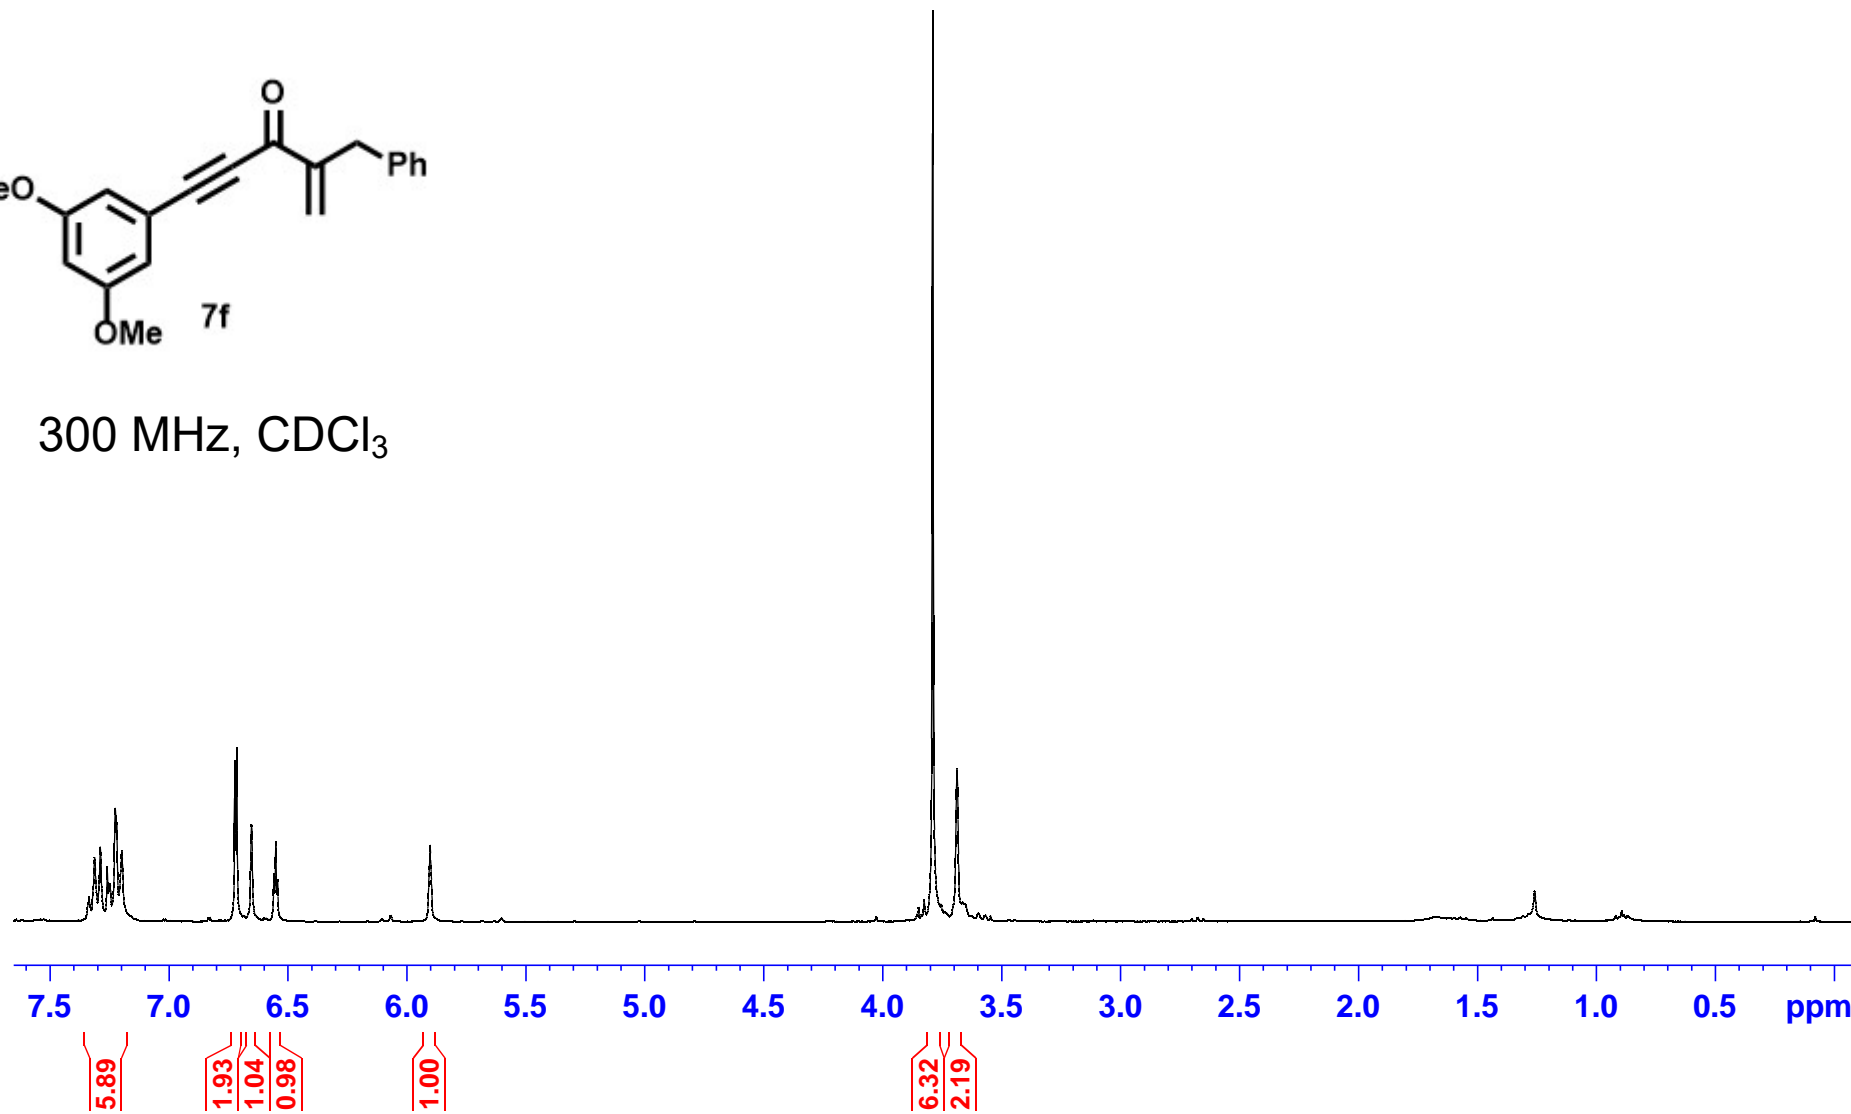

2MeO\_cc\_Ox\_CO\_Bn\_c13  
300US

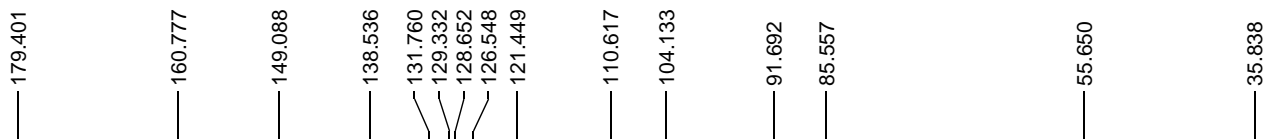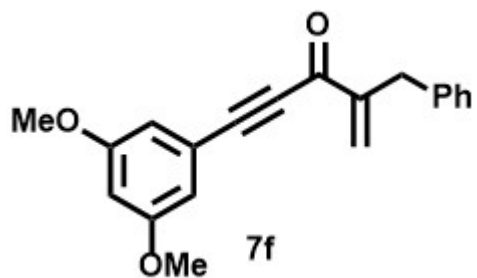

75 MHz, CDCl<sub>3</sub>

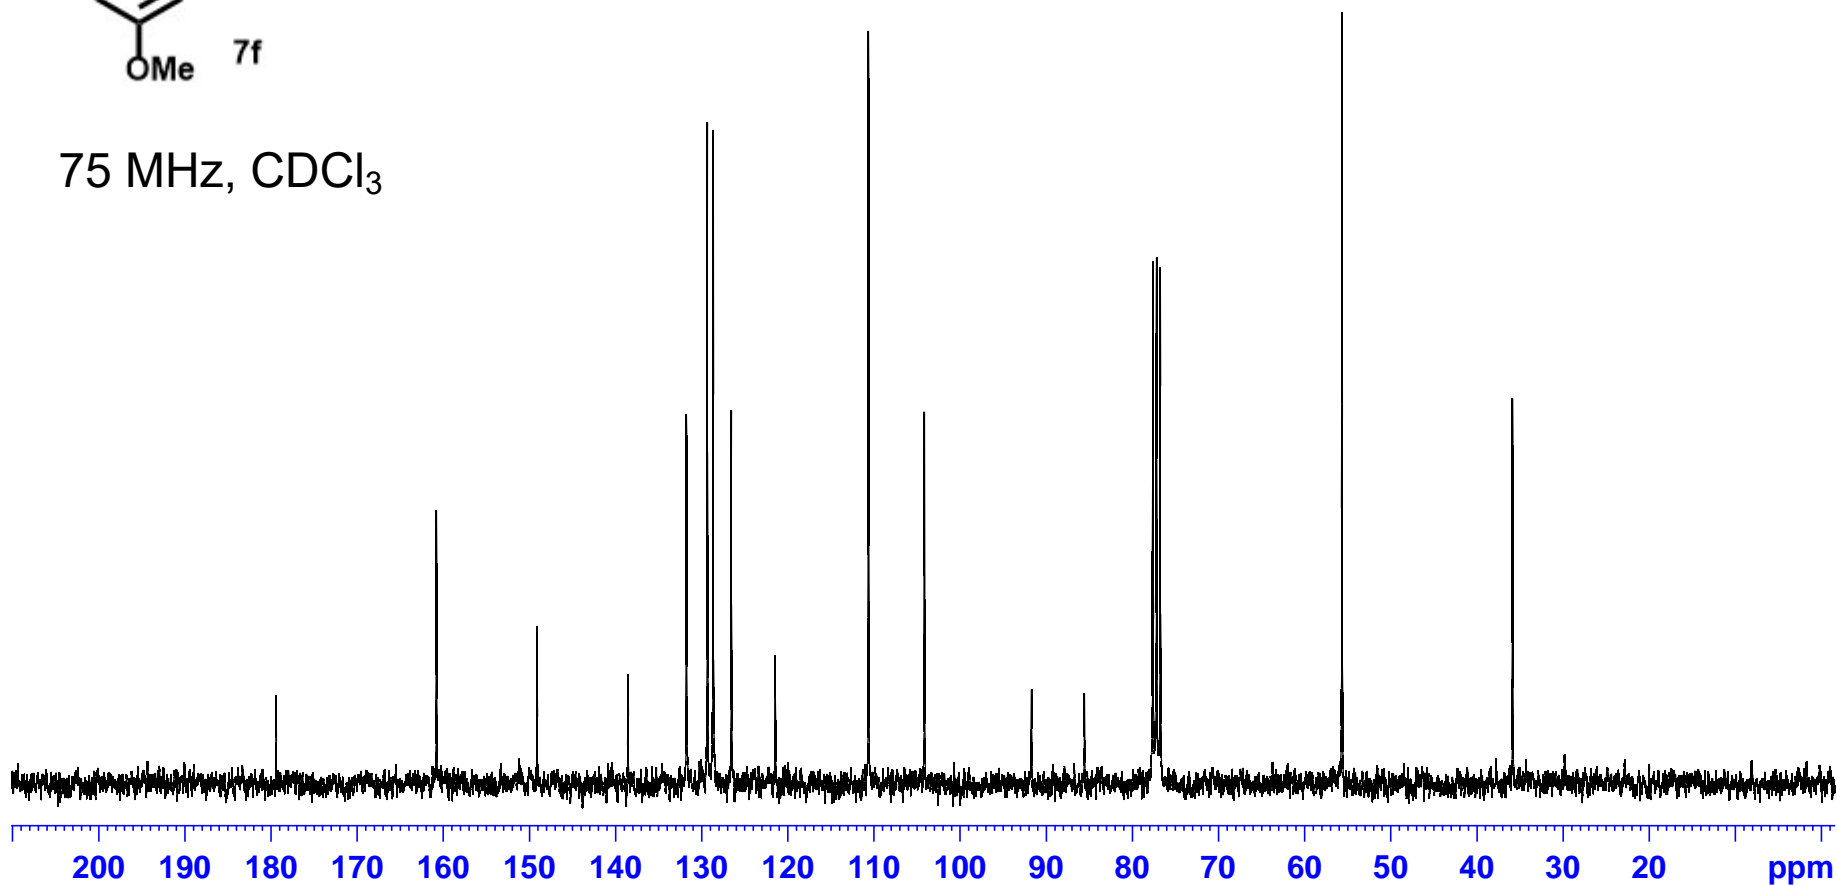

som.07f 3 1H, (MeO)2Ph-CC-CH(O)-C(iPr)=CH2, 9/3/21

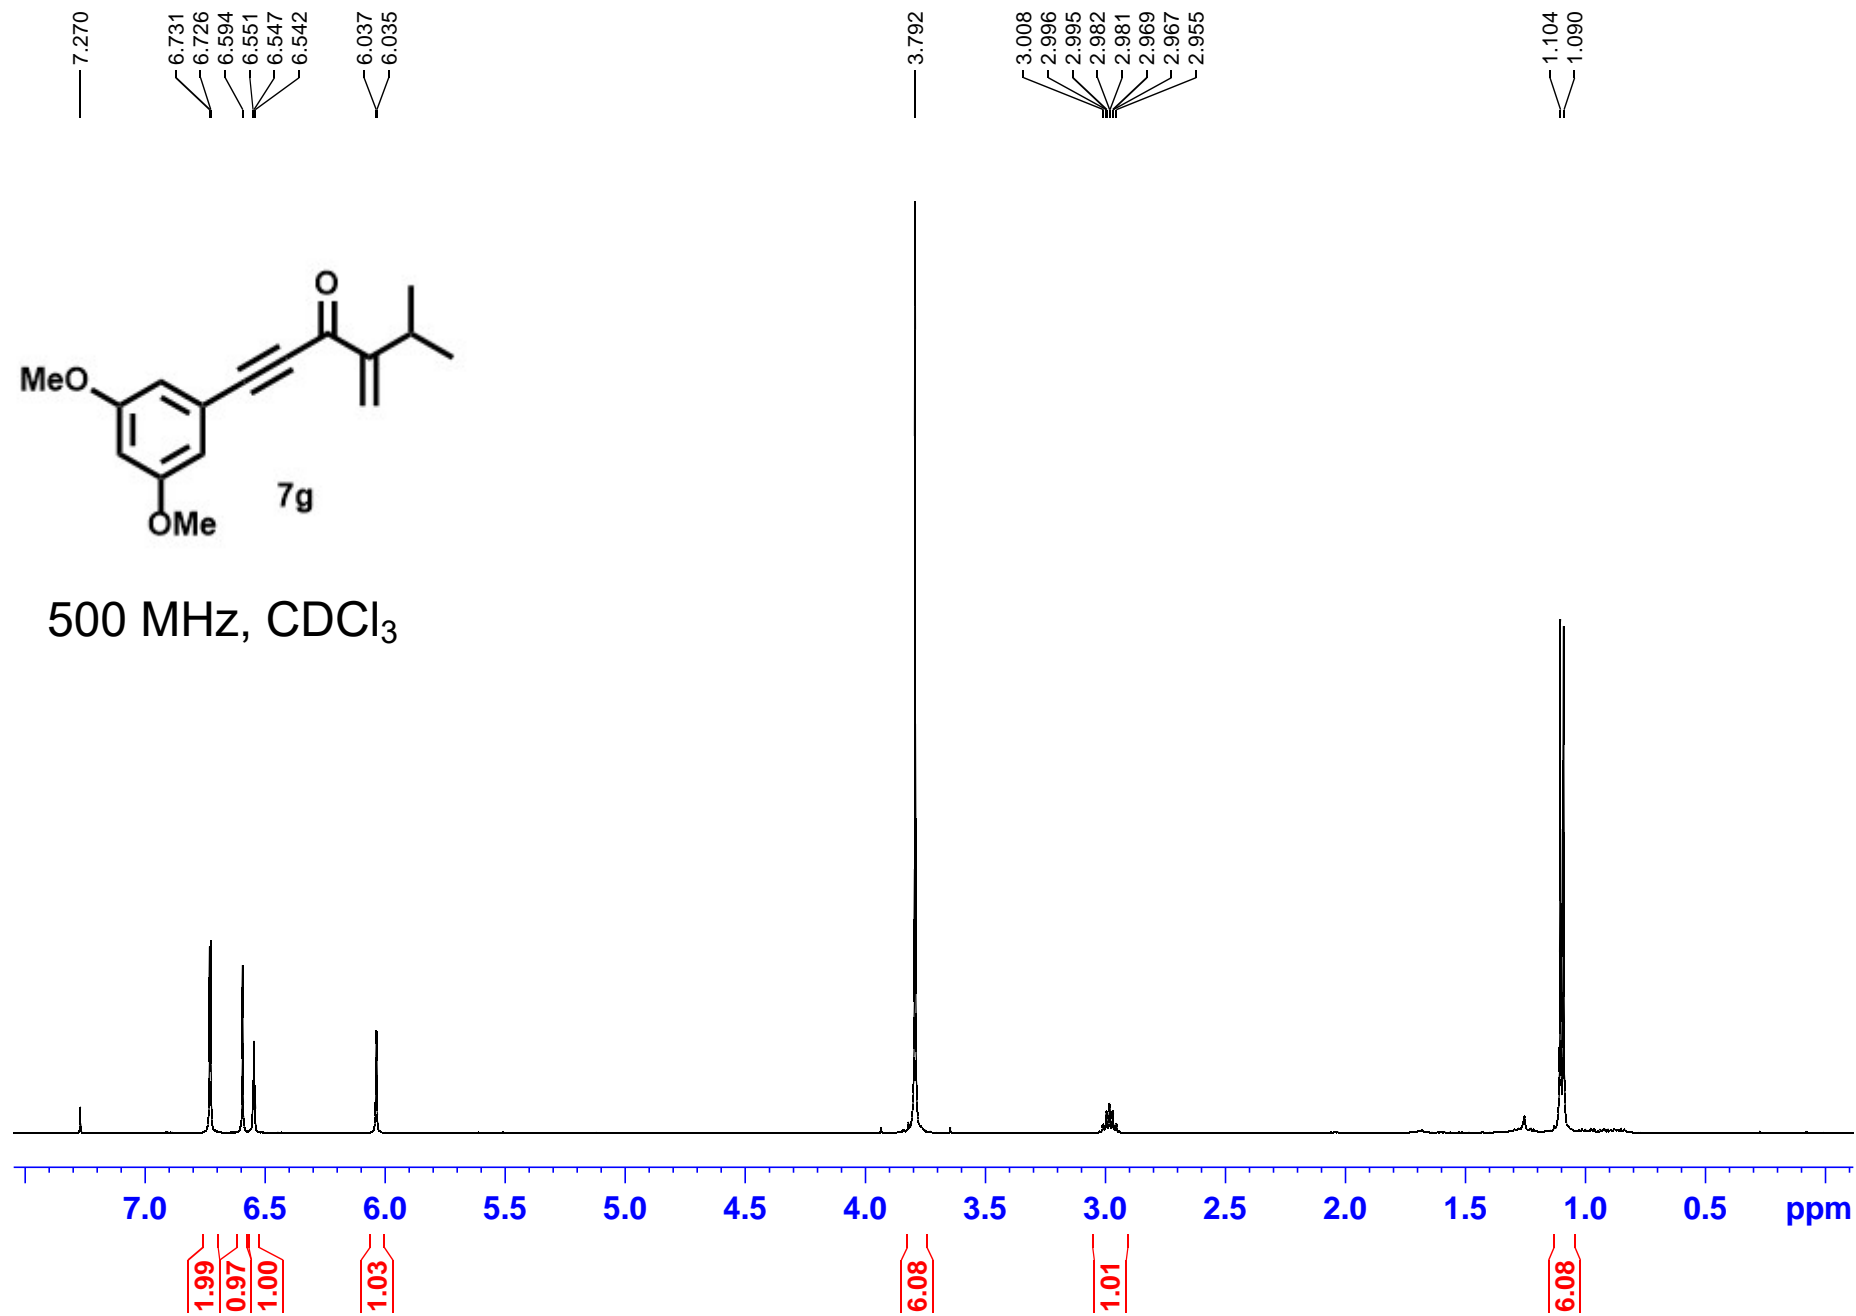



som.07f 4 <sup>13</sup>C, (MeO)<sub>2</sub>Ph-CC-C(O)-C(iPr)=CH<sub>2</sub>, 9/4/21

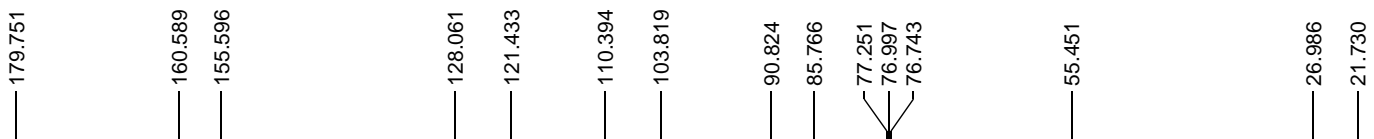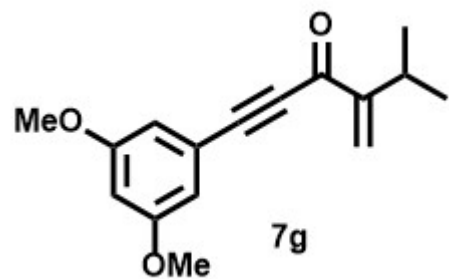

125 MHz, CDCl<sub>3</sub>

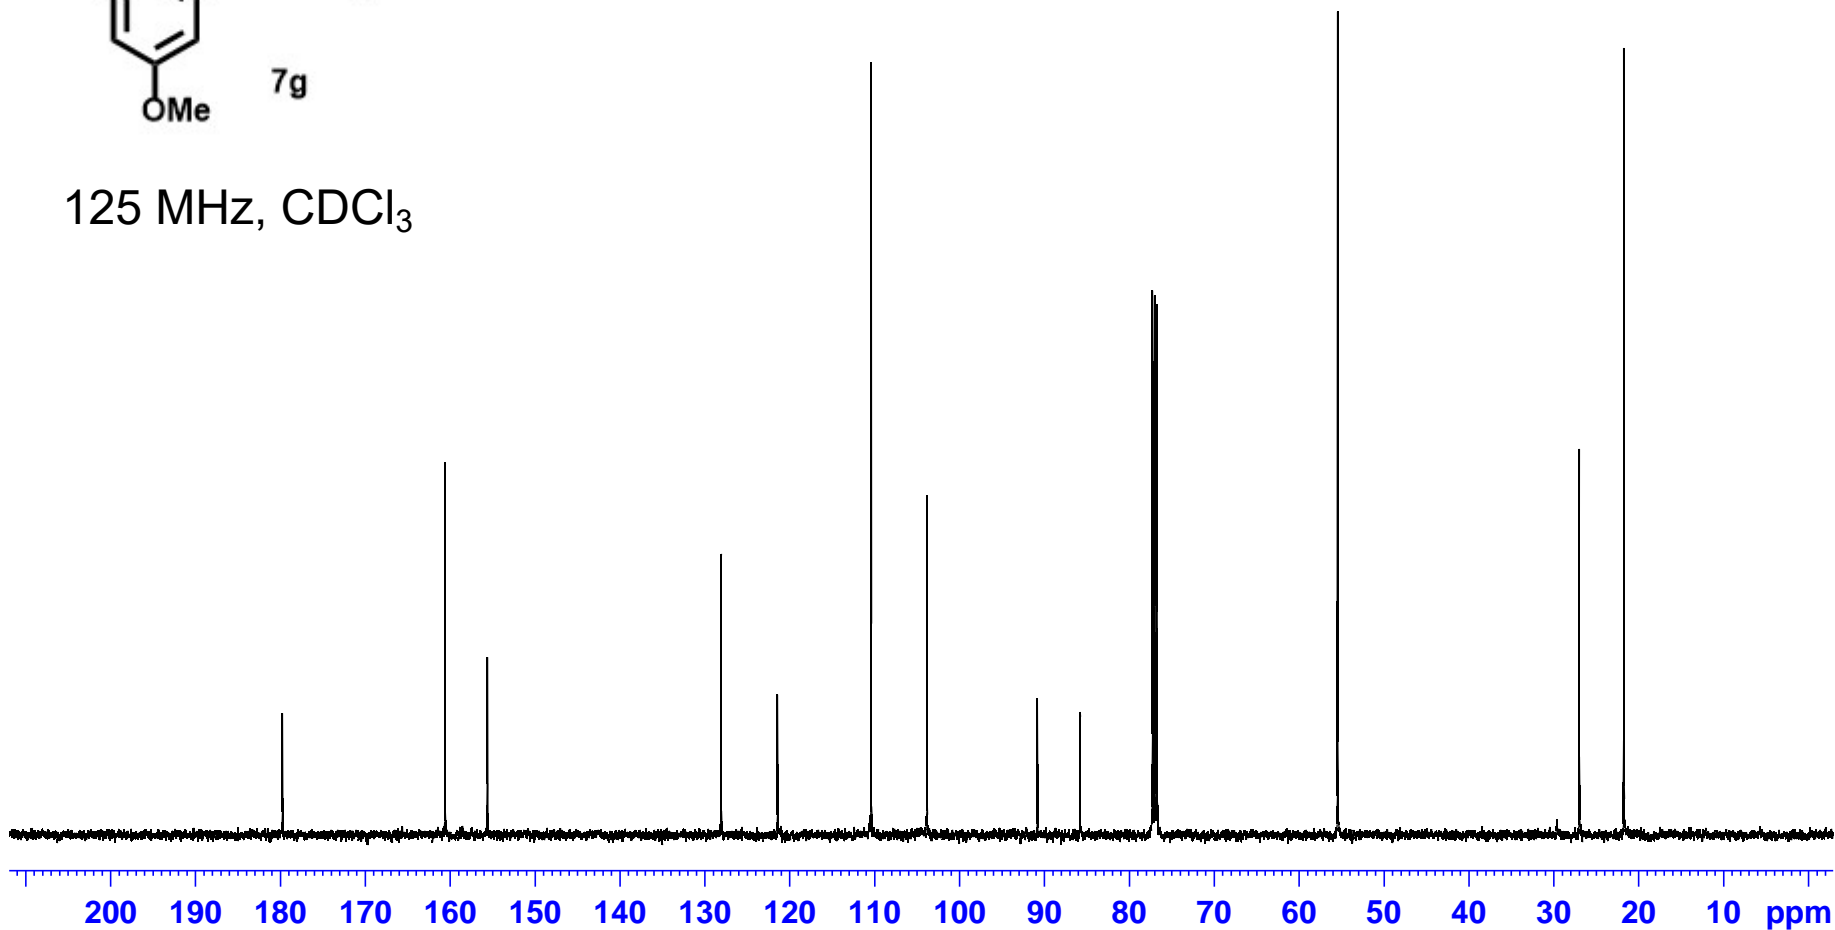

som.07i 2, cyclohexenyl-CC-C(O)-C(Me)=CH<sub>2</sub>, B82, 8/17/21

7.270

6.455  
6.449  
6.443  
6.391

5.973

2.186  
2.167

1.903

1.641  
1.622

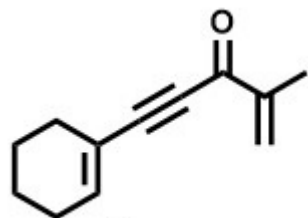

7i

300 MHz, CDCl<sub>3</sub>

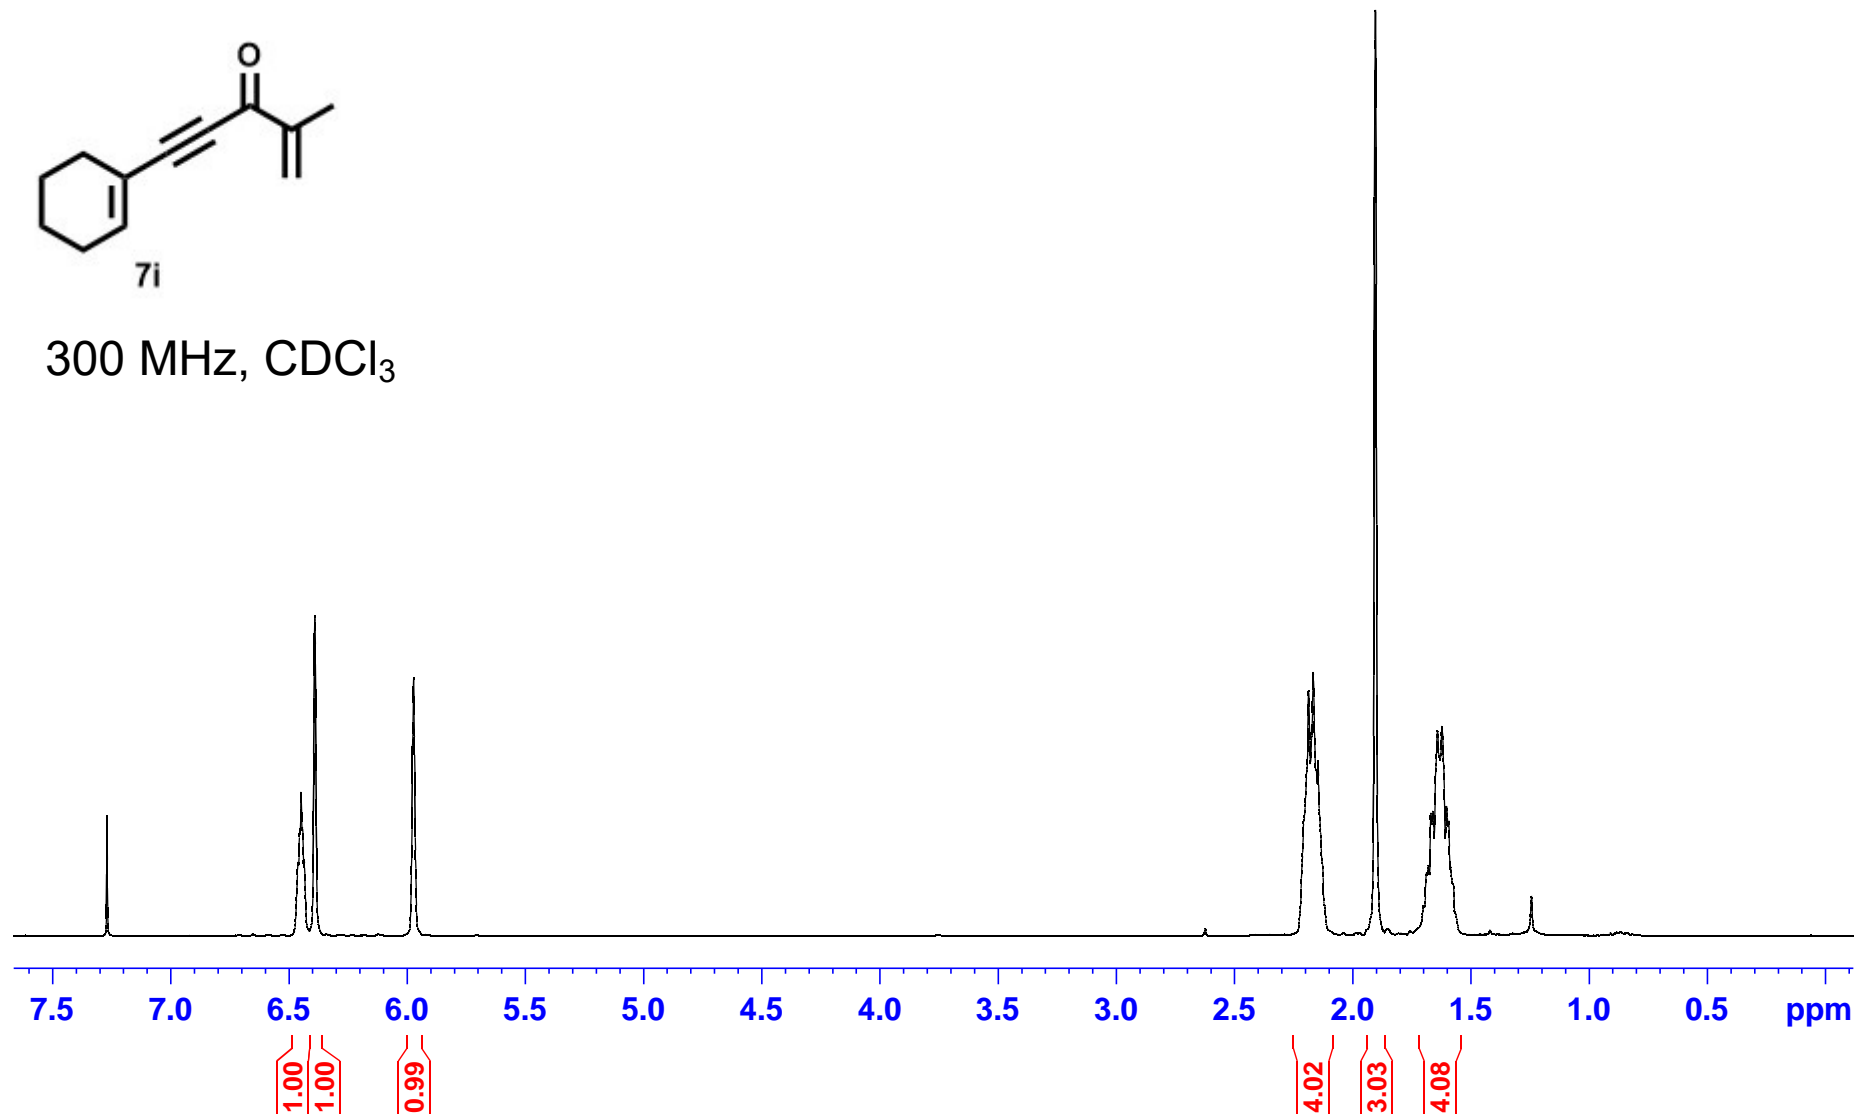

som.07i 3 13C, cyclohexenyl-CC-C(O)-C(Me)=Ch2, 8/17/21

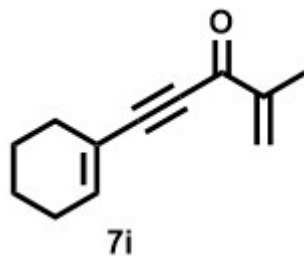

75 MHz, CDCl<sub>3</sub>

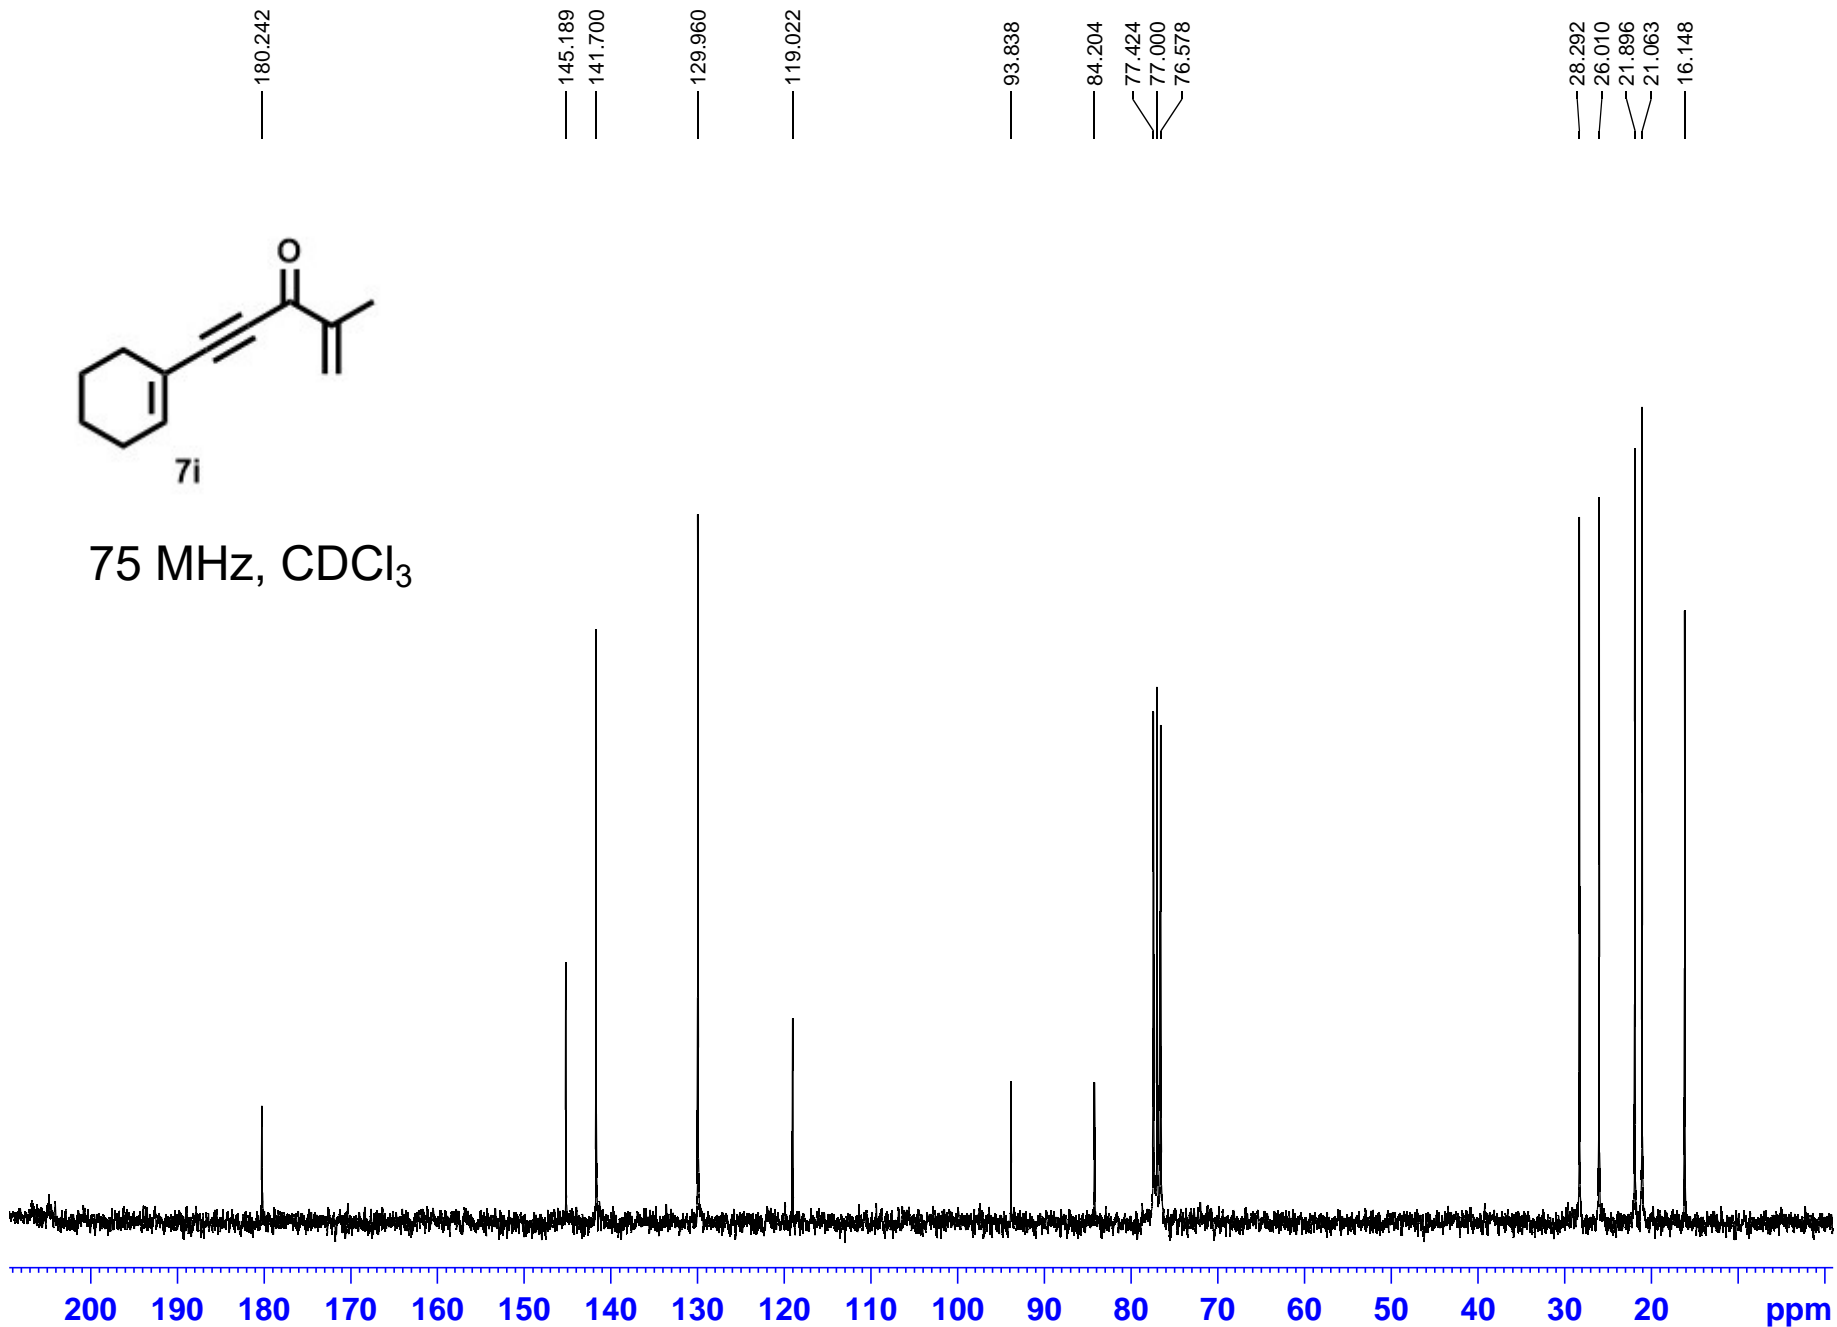

jrg.1338 11, cyclohexen-CC-C(O)-C(TIPS)=CH<sub>2</sub>, B82-300, 12/8/18

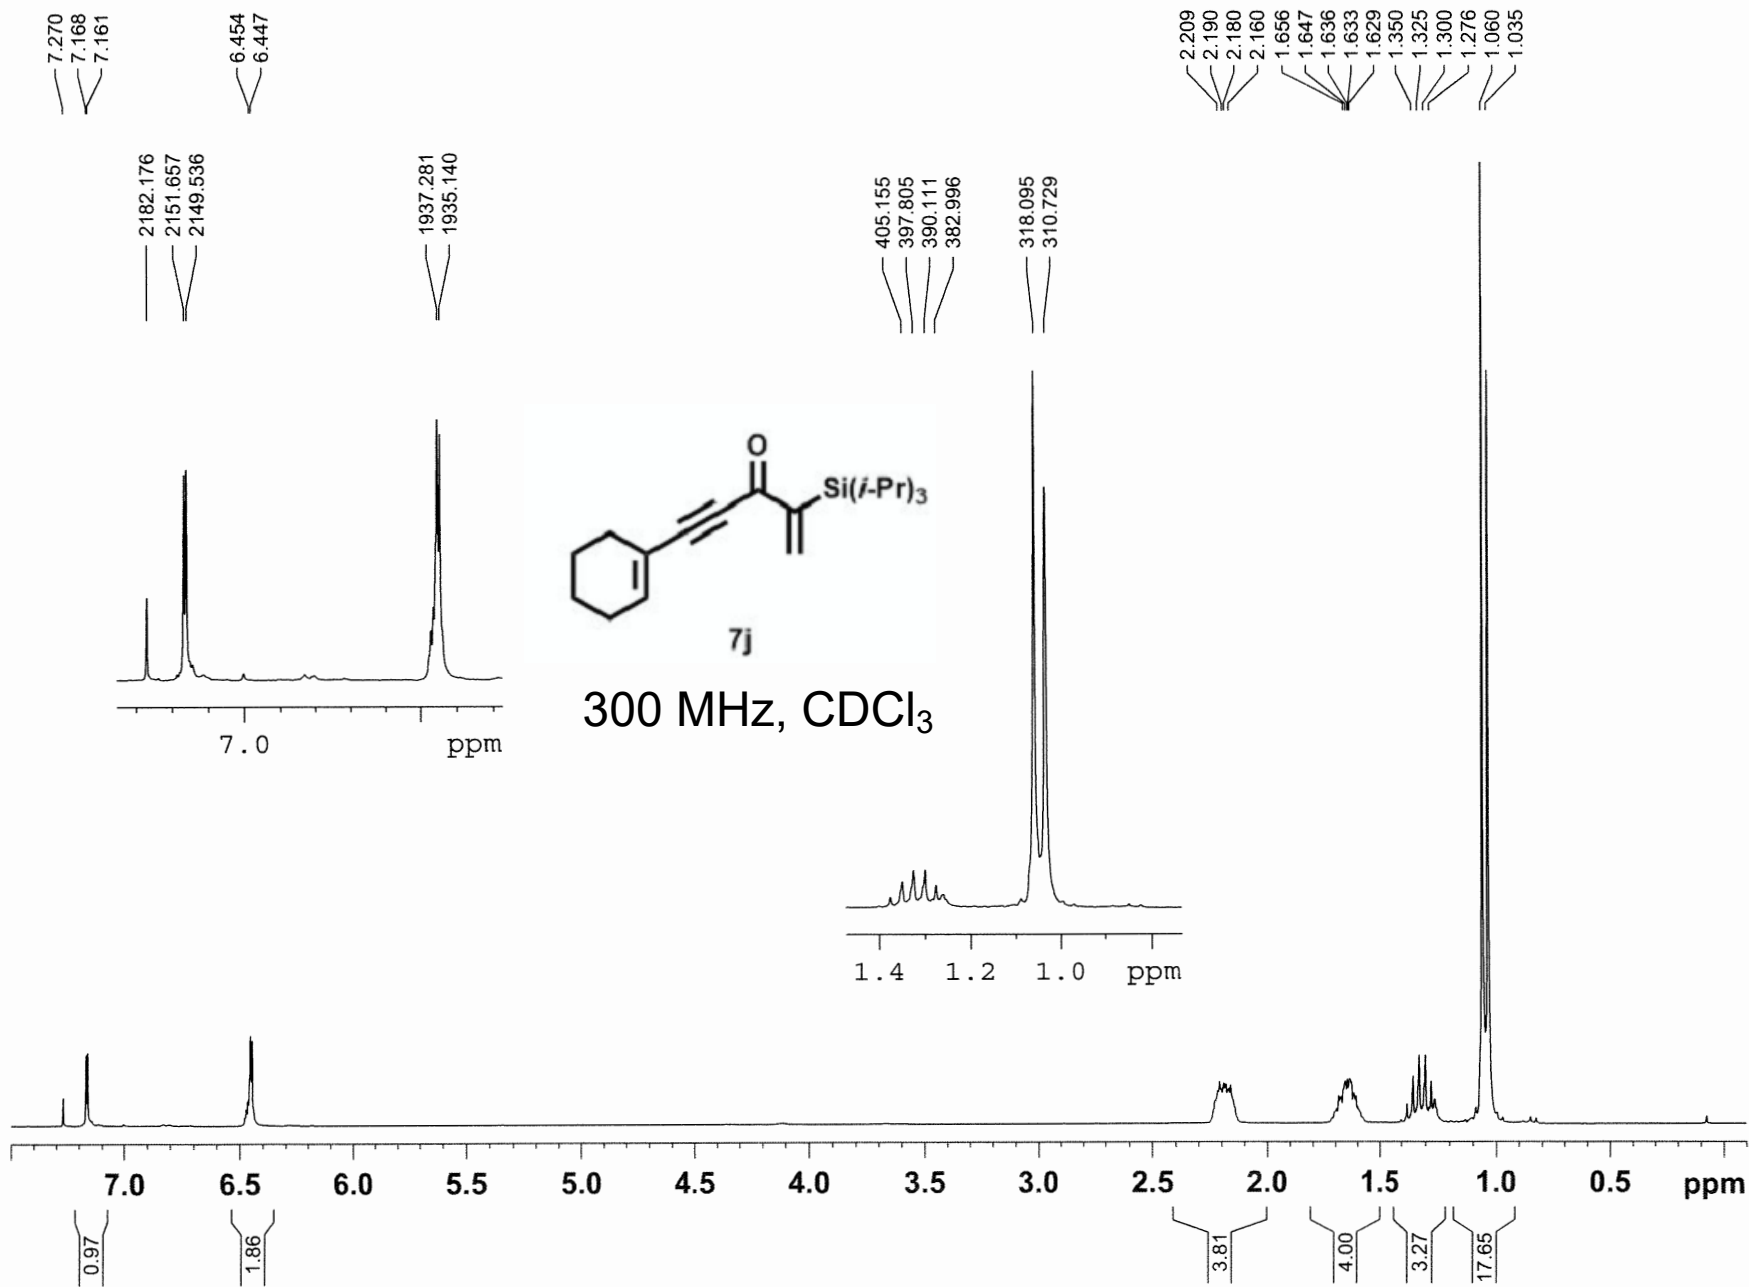

jrg.1338.12, 13C, cyclohexen-CC-C(O)-C(TIPS)=CH2, B82-300, 12/8/18

184.503

149.232

144.625

141.487

119.207

93.760

84.619

77.432

77.008

76.585

28.456

26.064

21.988

21.146

18.660

11.077

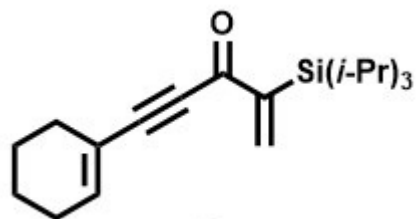

7j

75 MHz, CDCl<sub>3</sub>

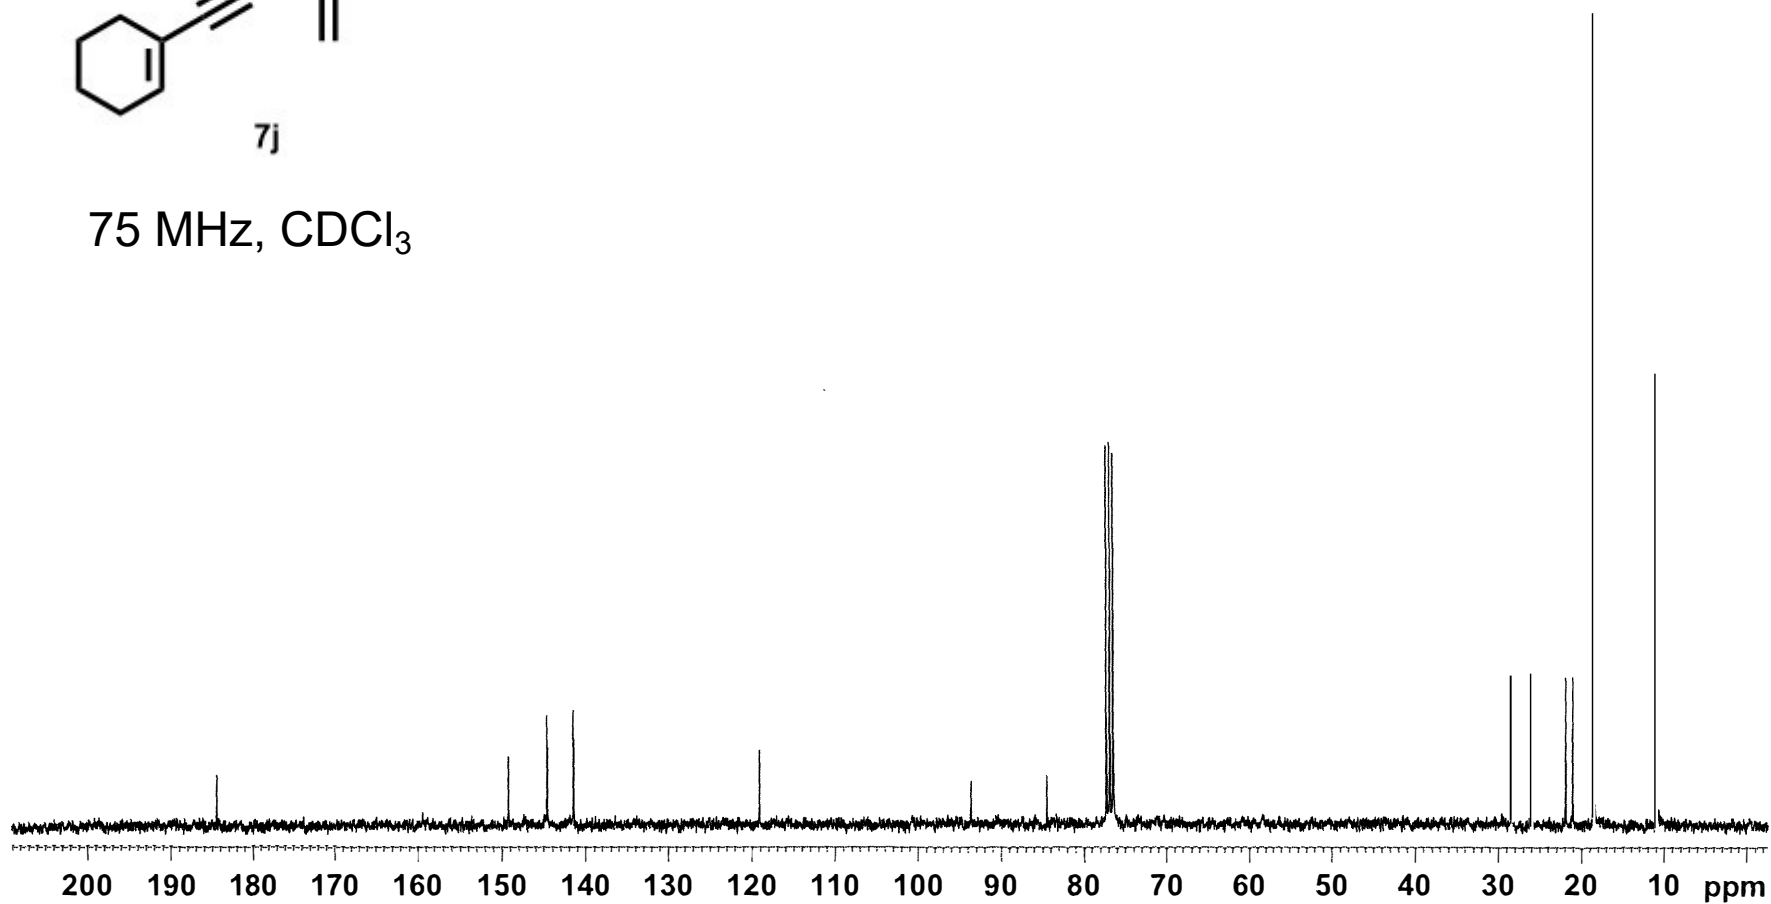

jrg.1448 3, 1H, 3-MeOPh-CC-C(O)-C(Me)=CH2]-Co2, 7/10/21

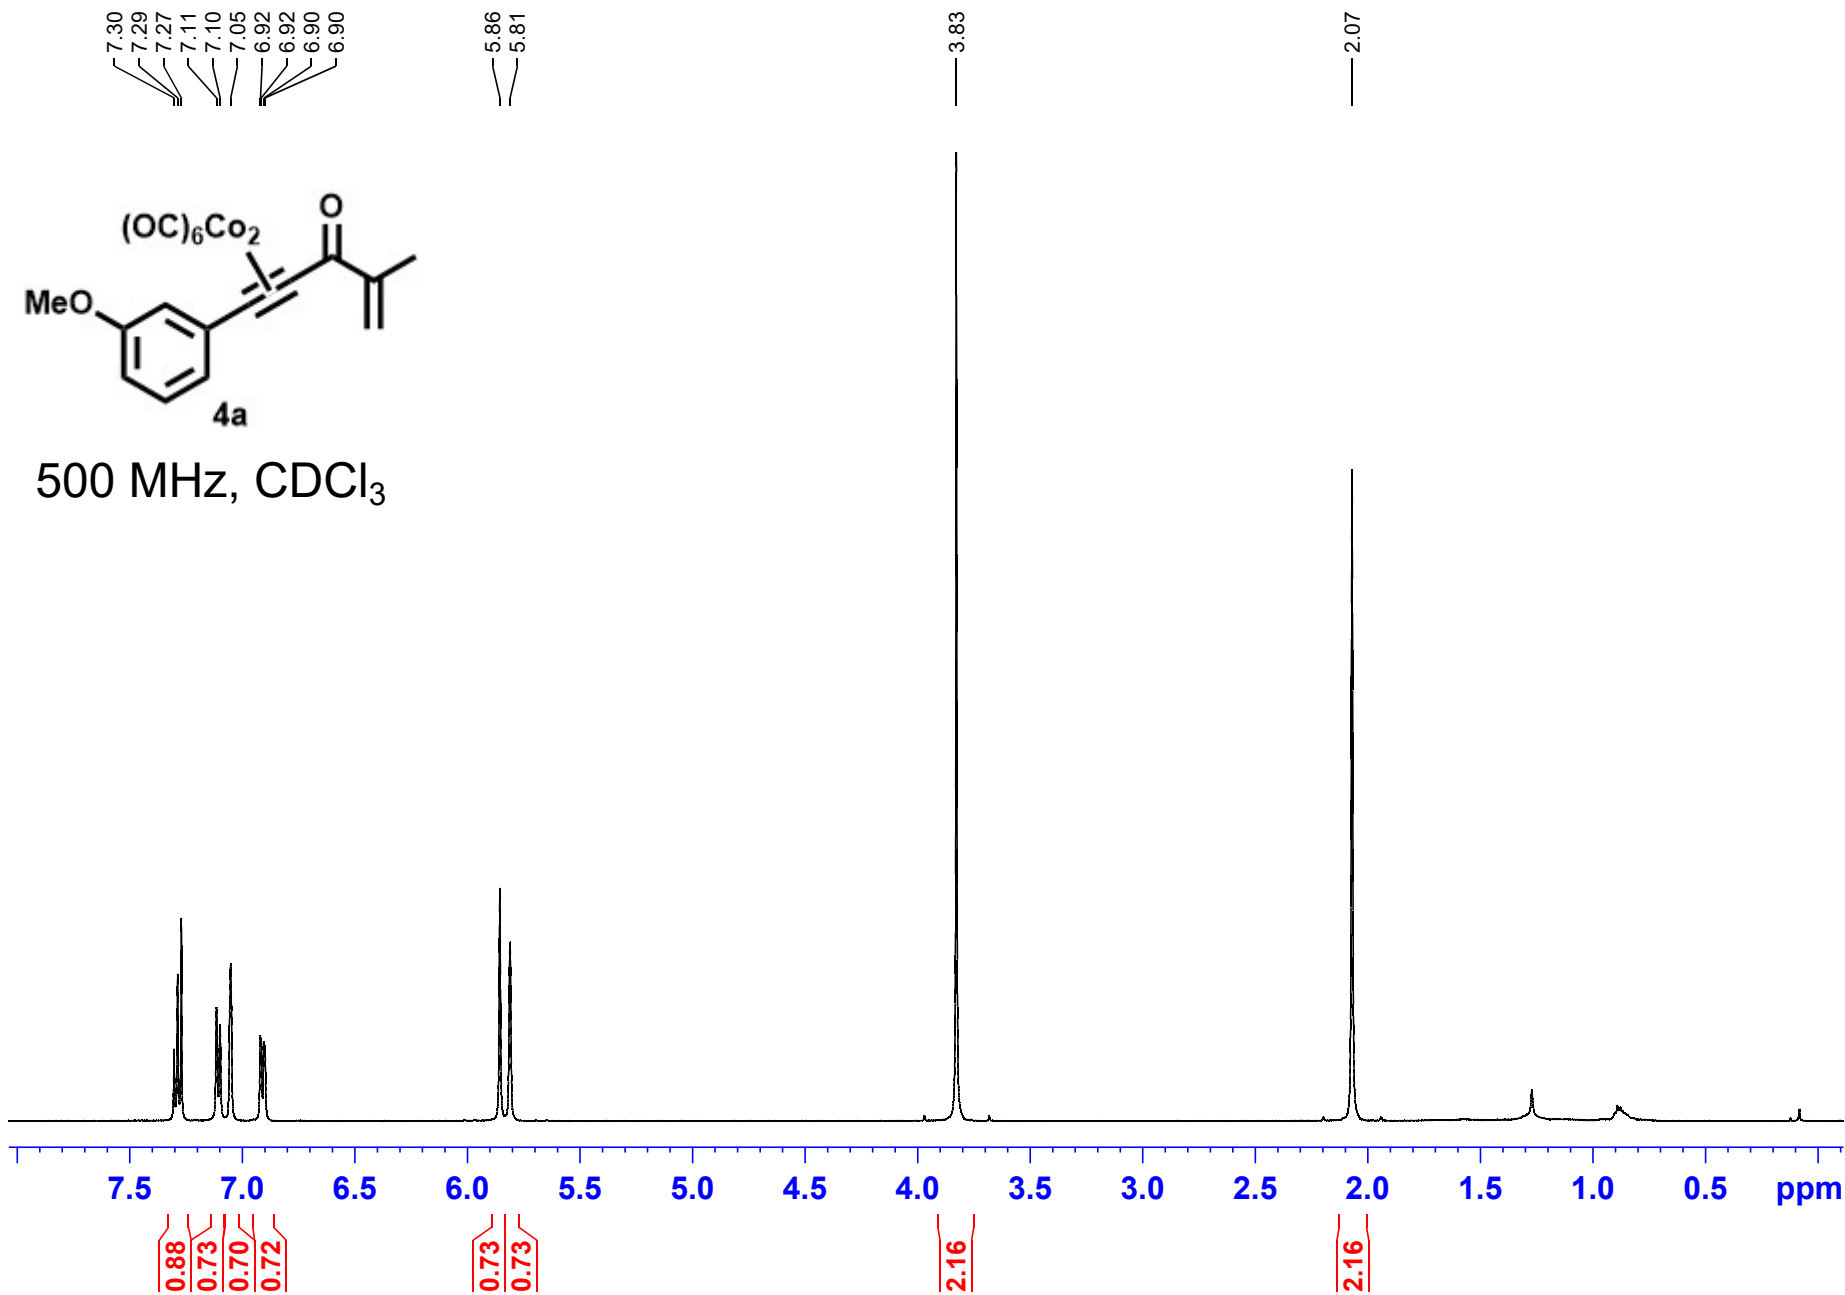

jrg.1449 4, <sup>13</sup>C, 3-MeOPh-CC-C(O)-C(Me)=CH<sub>2</sub>-Co<sub>2</sub>, 7/10/21

198.30  
194.78  
159.88  
144.03  
138.24  
130.11  
126.10  
122.36  
115.33  
113.94  
91.73  
85.72  
77.25  
77.00  
76.74  
55.26  
18.39

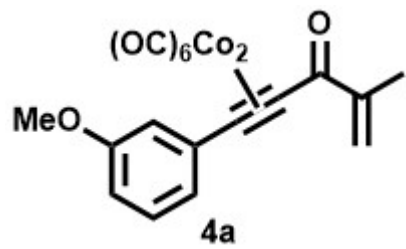

125 MHz, CDCl<sub>3</sub>

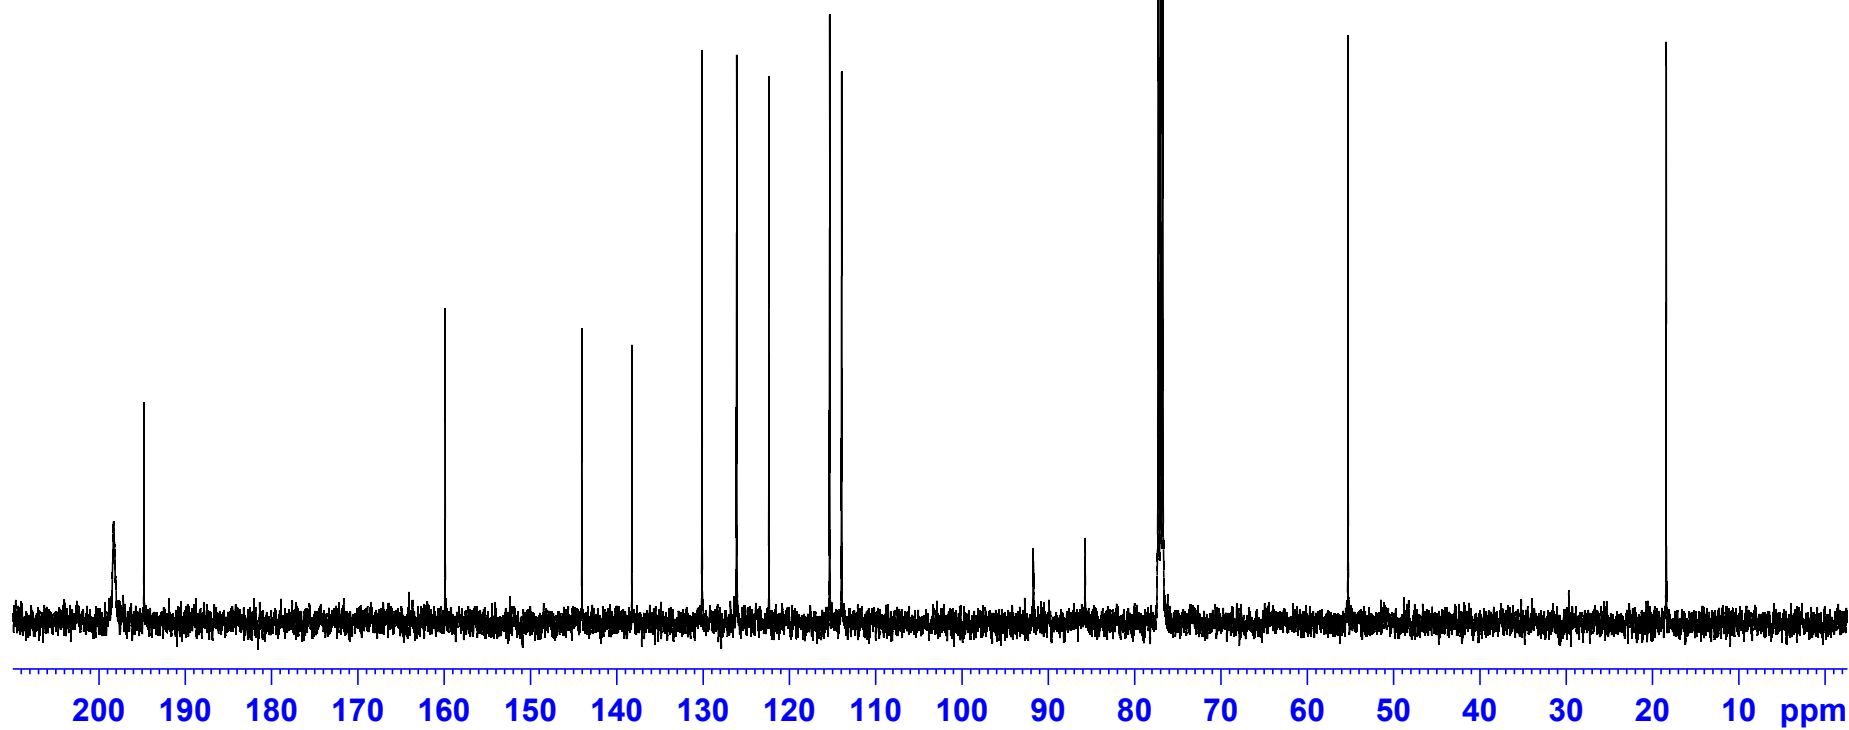

som.04b 1, (MeO)<sub>3</sub>Ph-CC-C(O)-C(Me)=CH<sub>2</sub>-Co<sub>2</sub>, 1H, 10/13/21

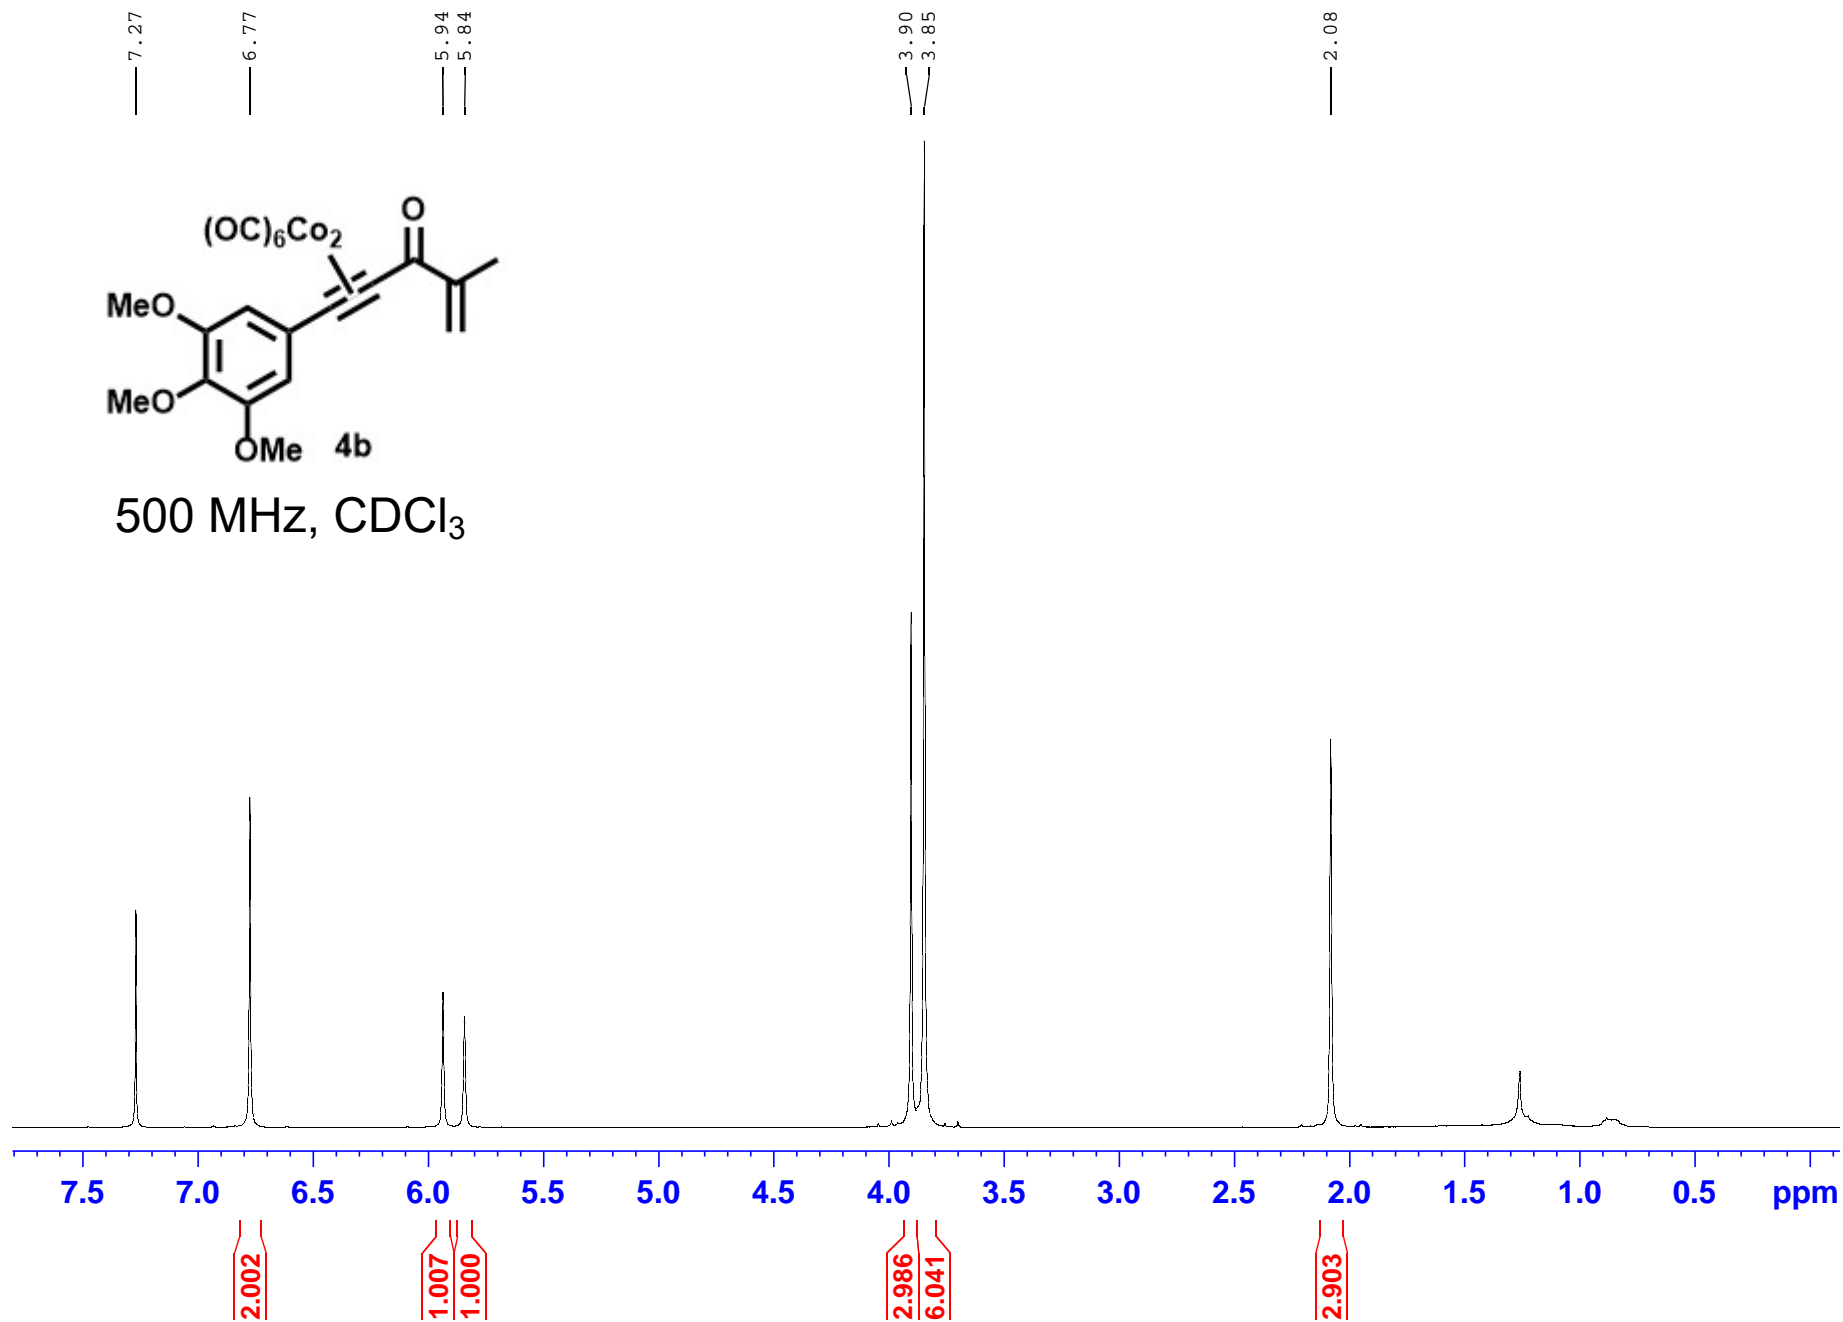



som.08b 2, <sup>13</sup>C, (MeO)<sub>3</sub>Ph-CC-C(O)-C(Me)=CH<sub>2</sub>-Co<sub>2</sub>, 10/6/21

198.352  
194.917

153.413

144.327

138.384

131.977

125.880

107.066

92.665

85.197

77.430  
77.008  
76.584

60.861

56.102

18.474

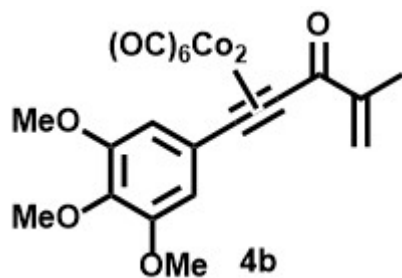

75 MHz, CDCl<sub>3</sub>

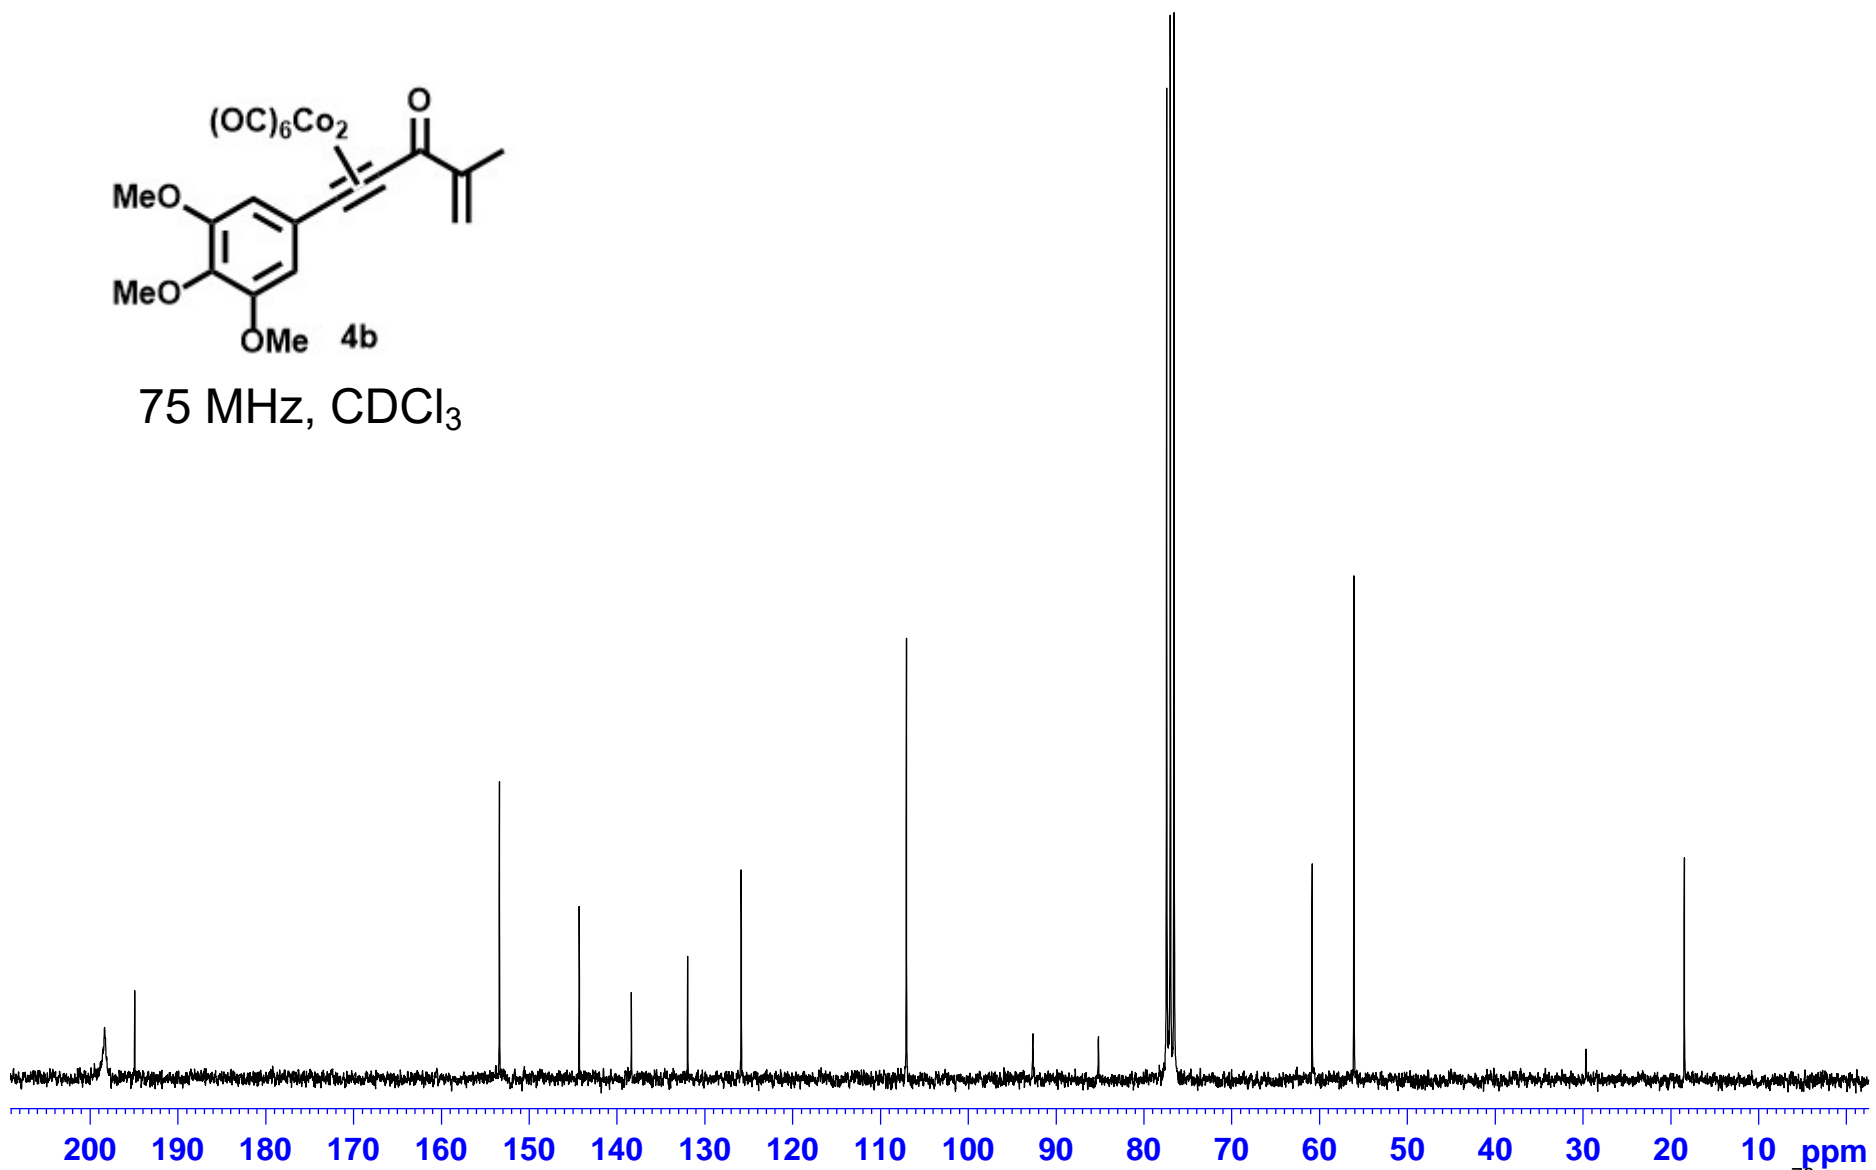

som.04c 2, (MeO)<sub>2</sub>Ph-CC-C(O)-C(Me)=CH<sub>2</sub>]-Co<sub>2</sub>, 1H, 10/13/21

6.669  
6.665  
6.472  
6.468  
6.464  
5.877  
5.820

3.804

2.068

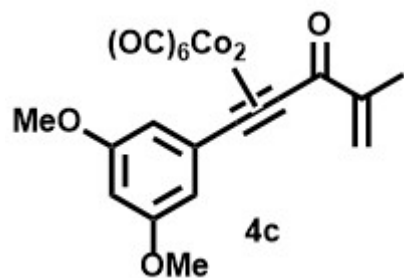

500 MHz, CDCl<sub>3</sub>

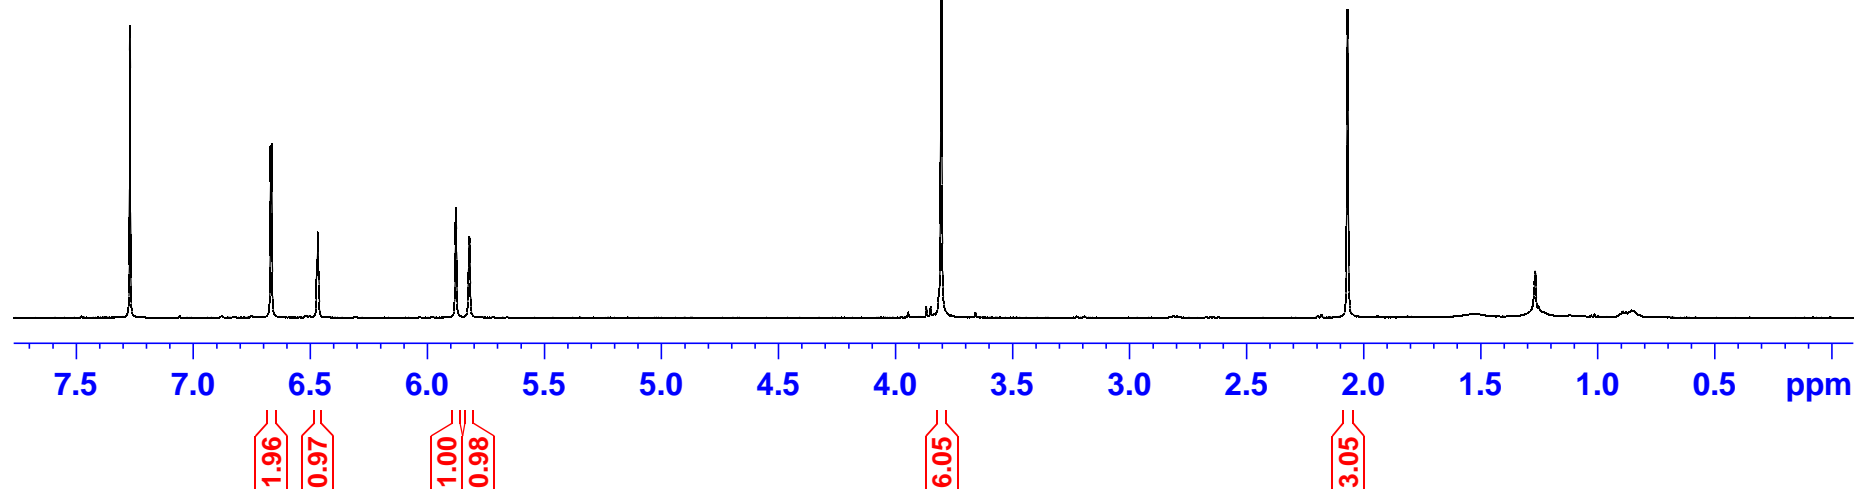

dimethoxy\_cc\_cobalt\_methyl\_carbon\_c13

300US

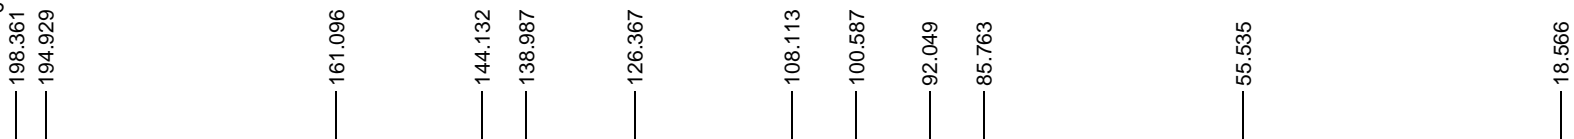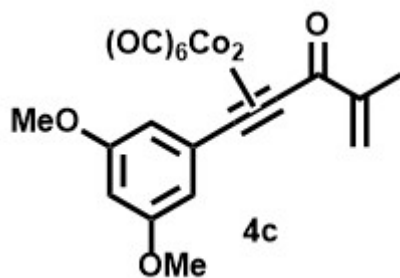

75 MHz, CDCl<sub>3</sub>

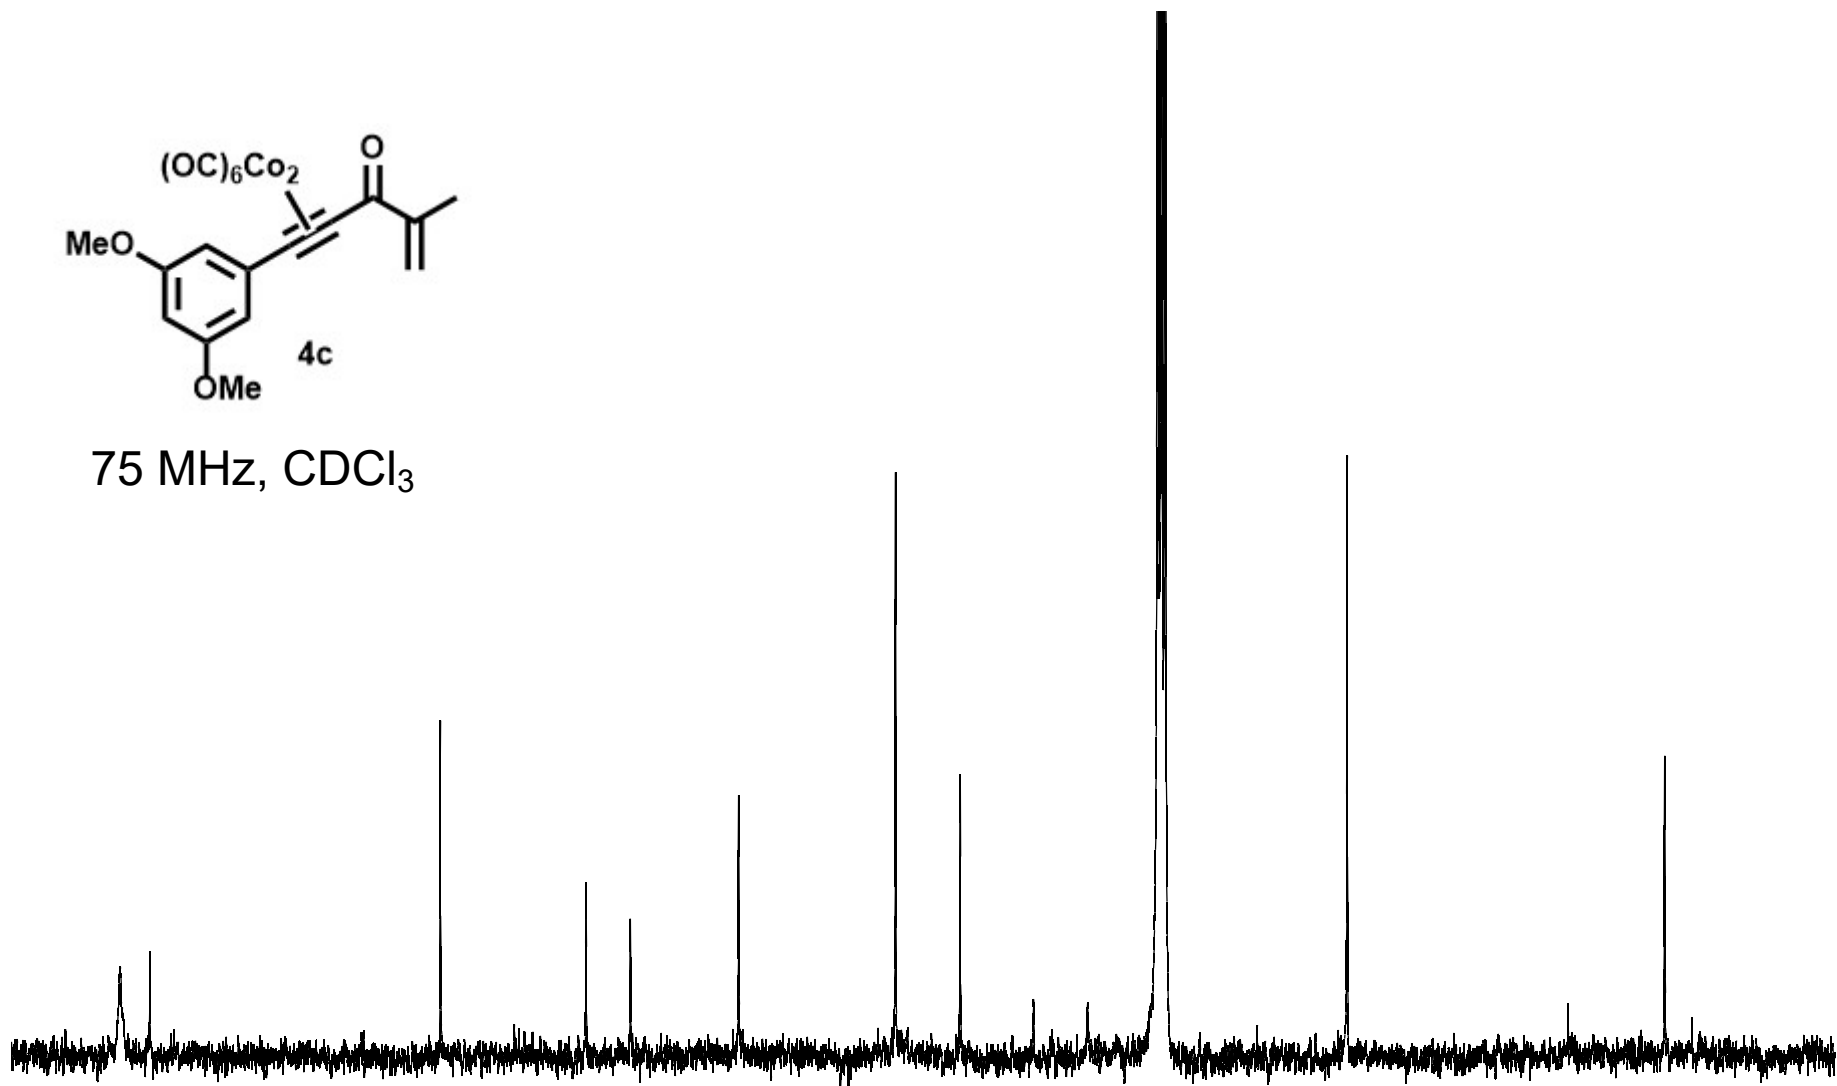

200 190 180 170 160 150 140 130 120 110 100 90 80 70 60 50 40 30 20 ppm

project3\_pyrrole\_H1\_cobalt\_clean

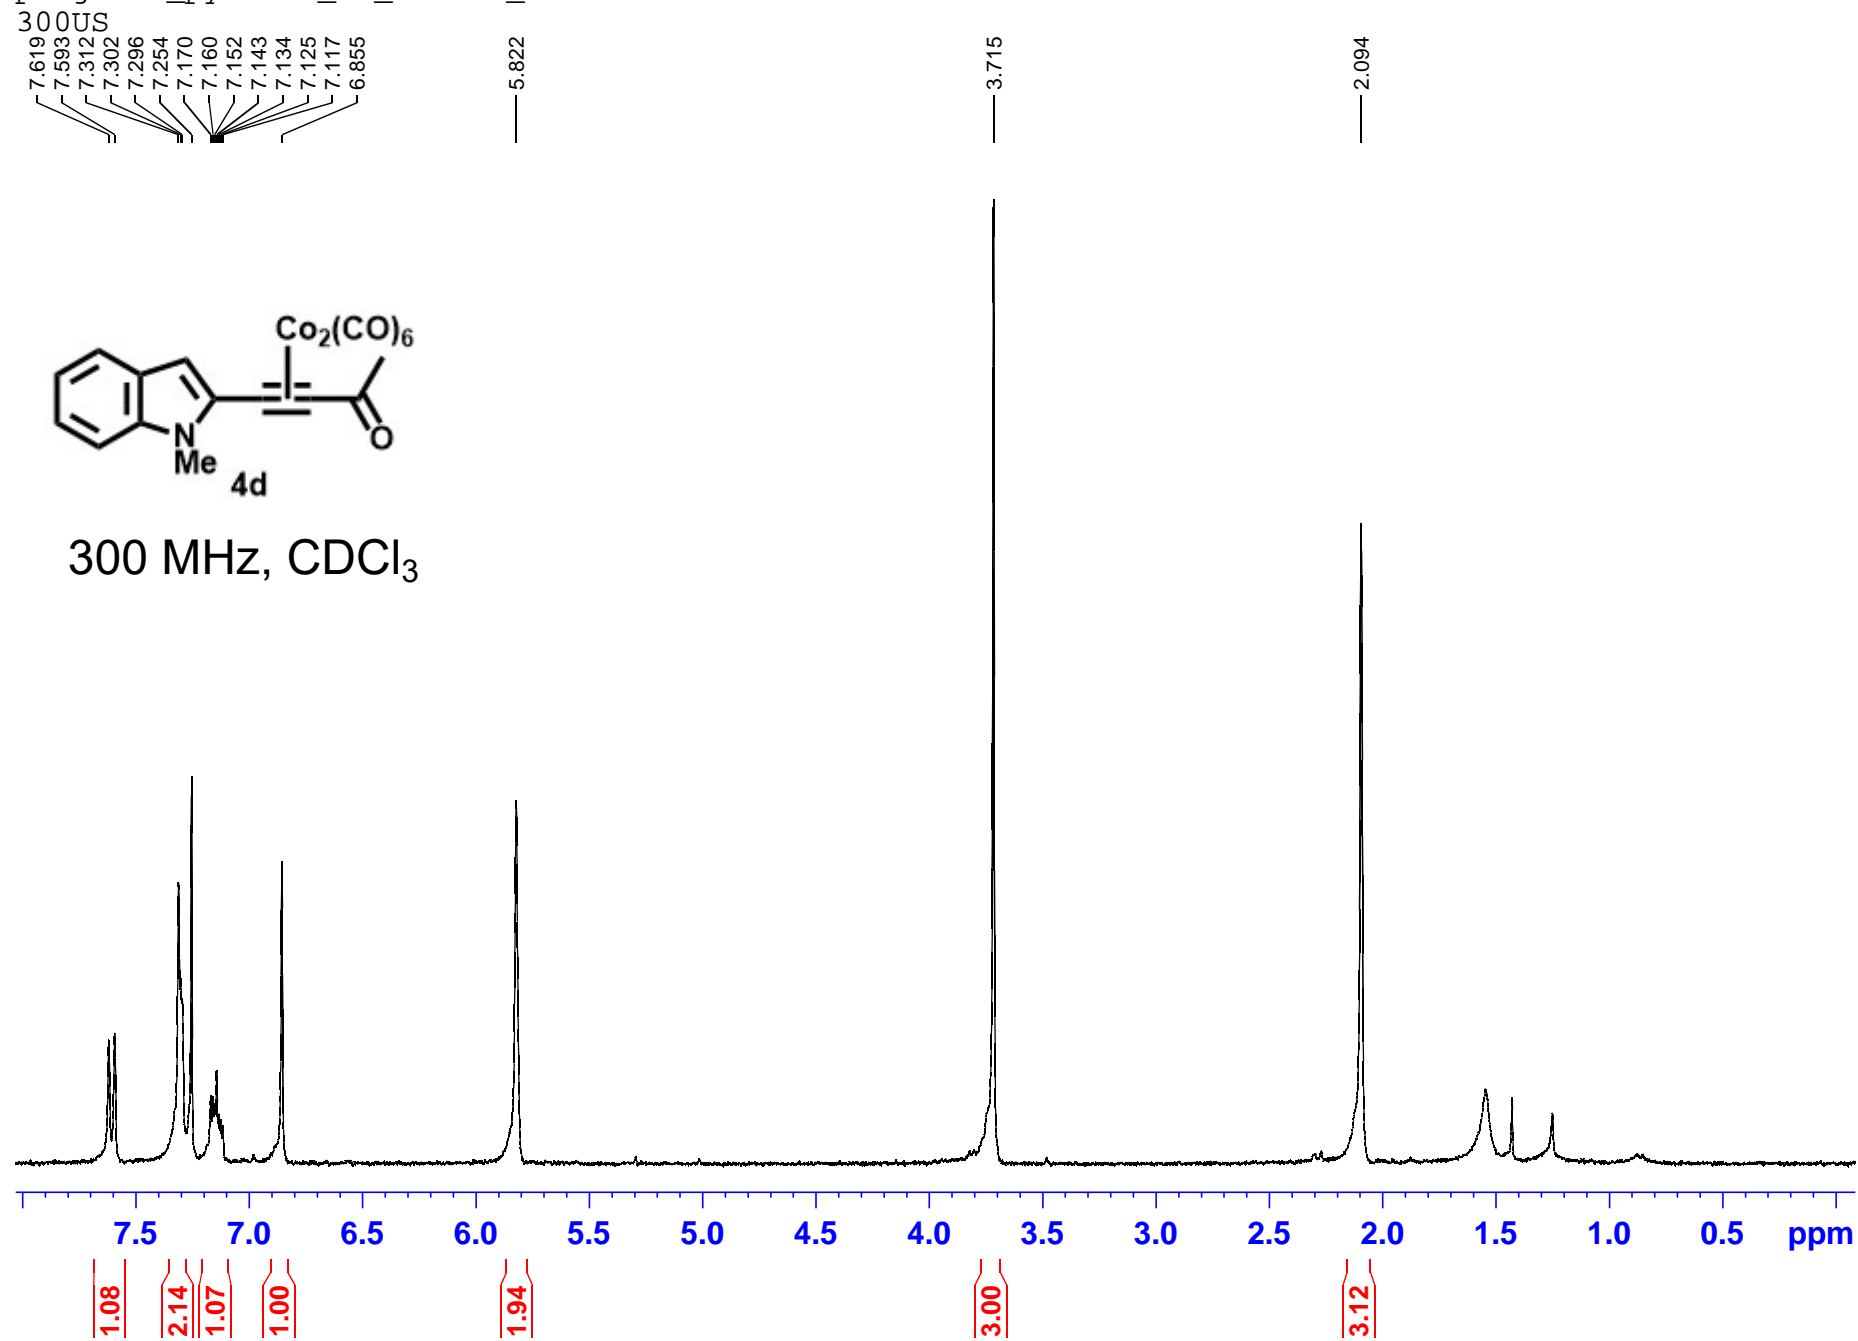

indole\_cc\_keton\_cobalt\_C13

300US

198.544  
195.028

144.352  
139.052  
134.232  
128.035  
126.283  
123.403  
120.914  
120.672  
109.635  
107.954

78.067  
77.339

30.727

18.571

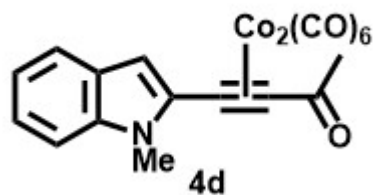

75 MHz, CDCl<sub>3</sub>

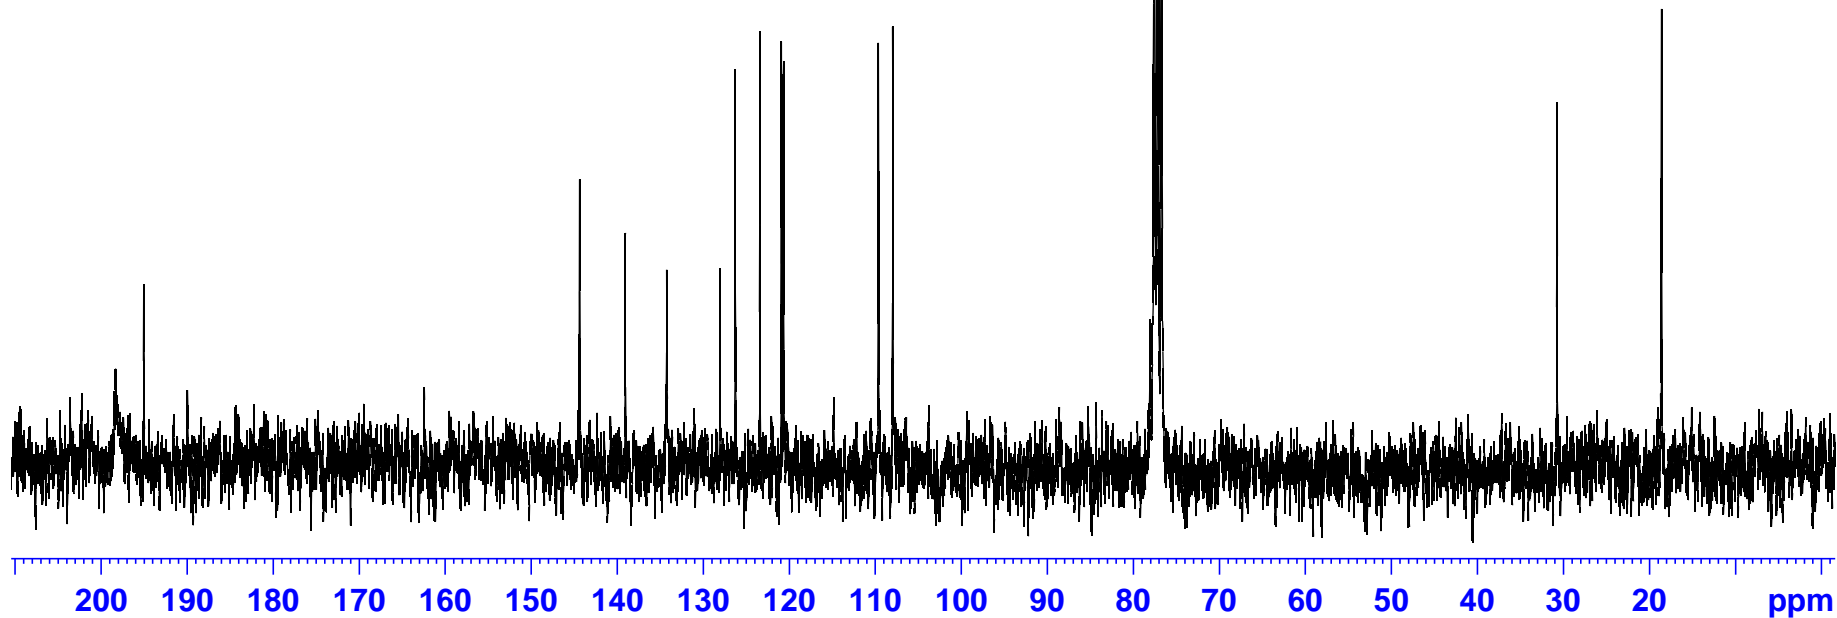

dimethoxy\_cc\_cobalt\_ethyl

1D 1H

DPX300

6.659  
6.652  
6.464  
6.457  
6.450  
5.848  
5.728

2.512  
2.487  
2.463  
2.438

1.123  
1.098  
1.073

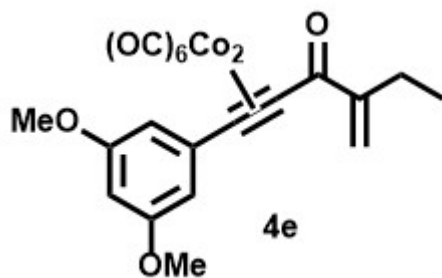

300 MHz, CDCl<sub>3</sub>

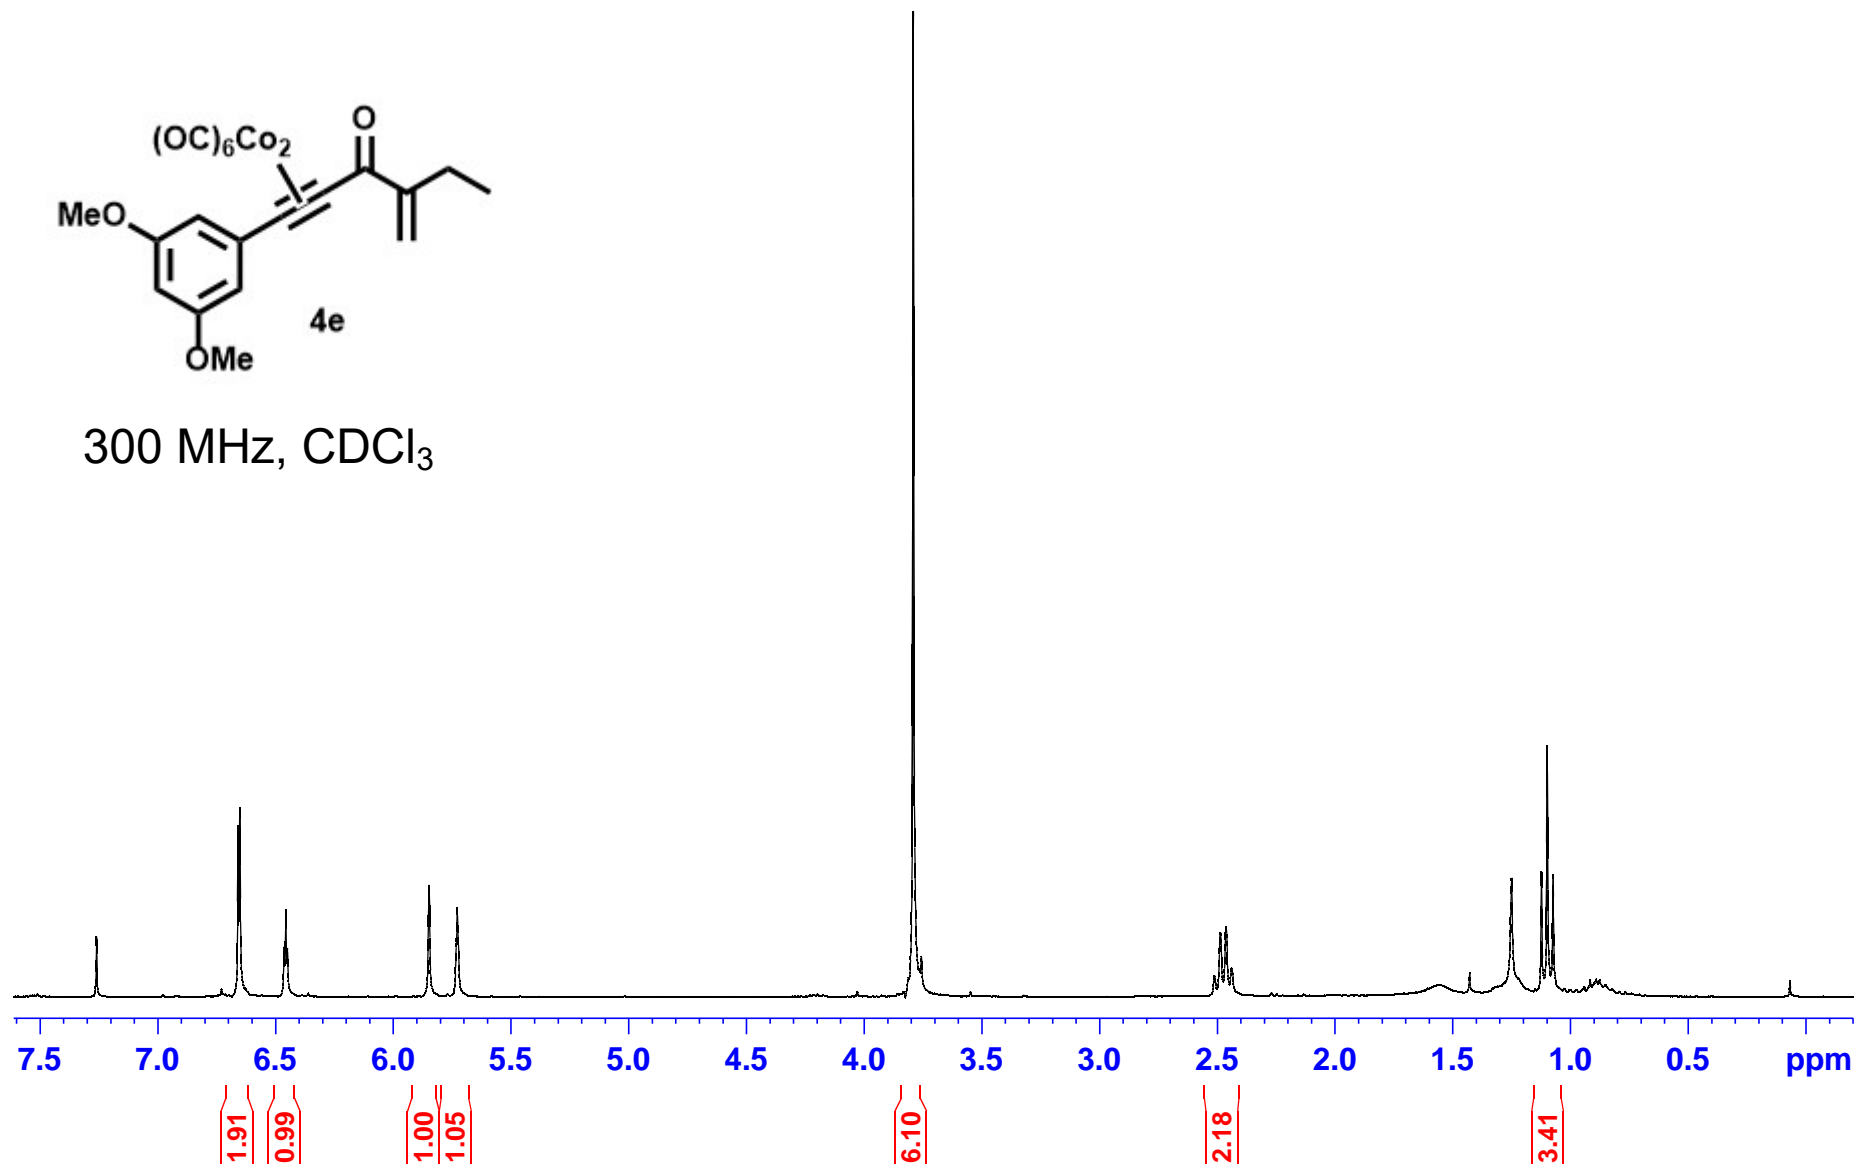

dimethoxy\_cc\_cobalt\_ethyl\_c13

198.325  
194.913

160.995

150.281

138.907

123.769

107.962

100.553

92.054

86.624

55.404

29.709

24.932

12.567

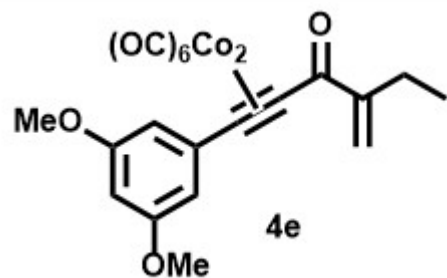

75 MHz, CDCl<sub>3</sub>

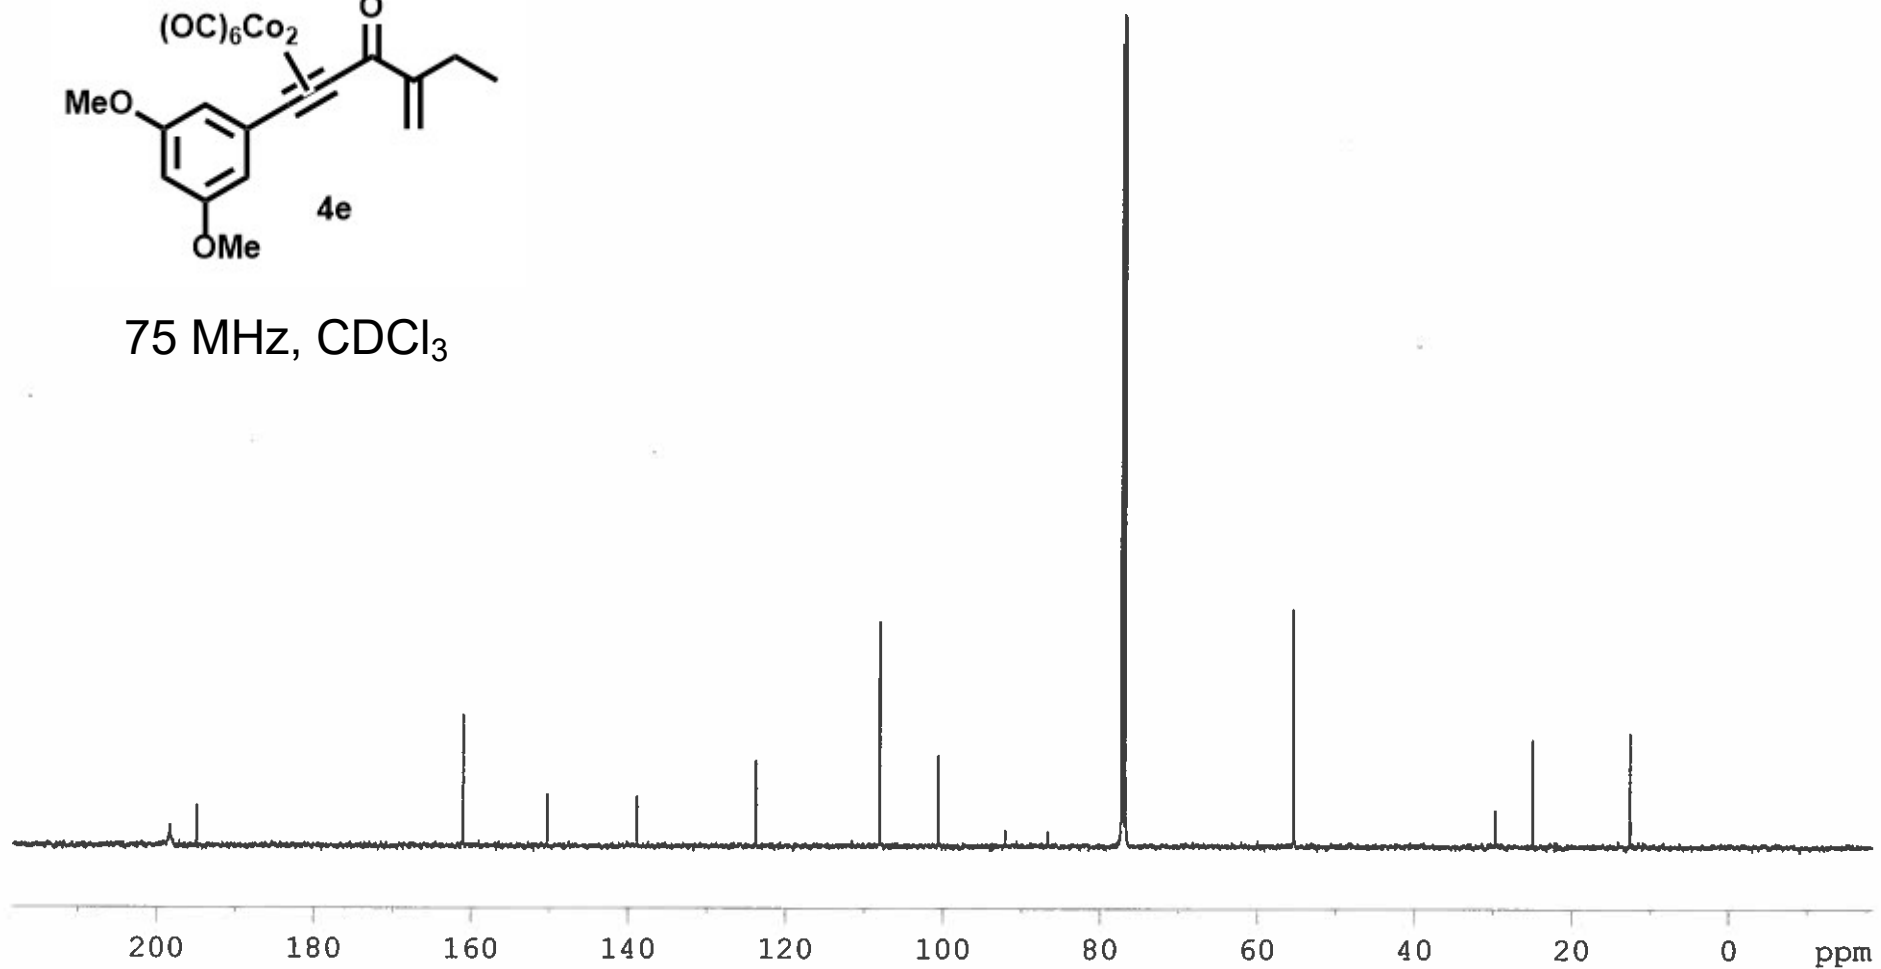

dimethoxy\_cc\_cobalt\_benzyl\_f1

1D 1H

DPX300

7.303  
7.279  
7.274  
7.261  
7.255  
7.221  
7.198  
7.192

6.625  
6.618  
6.452  
6.445  
6.437

5.912

5.675

3.780  
3.768

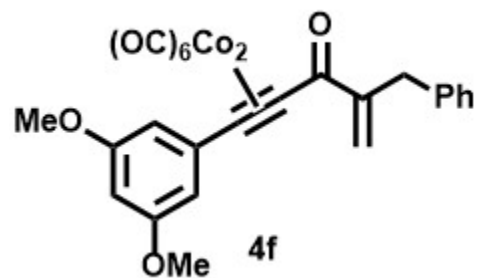

300 MHz, CDCl<sub>3</sub>

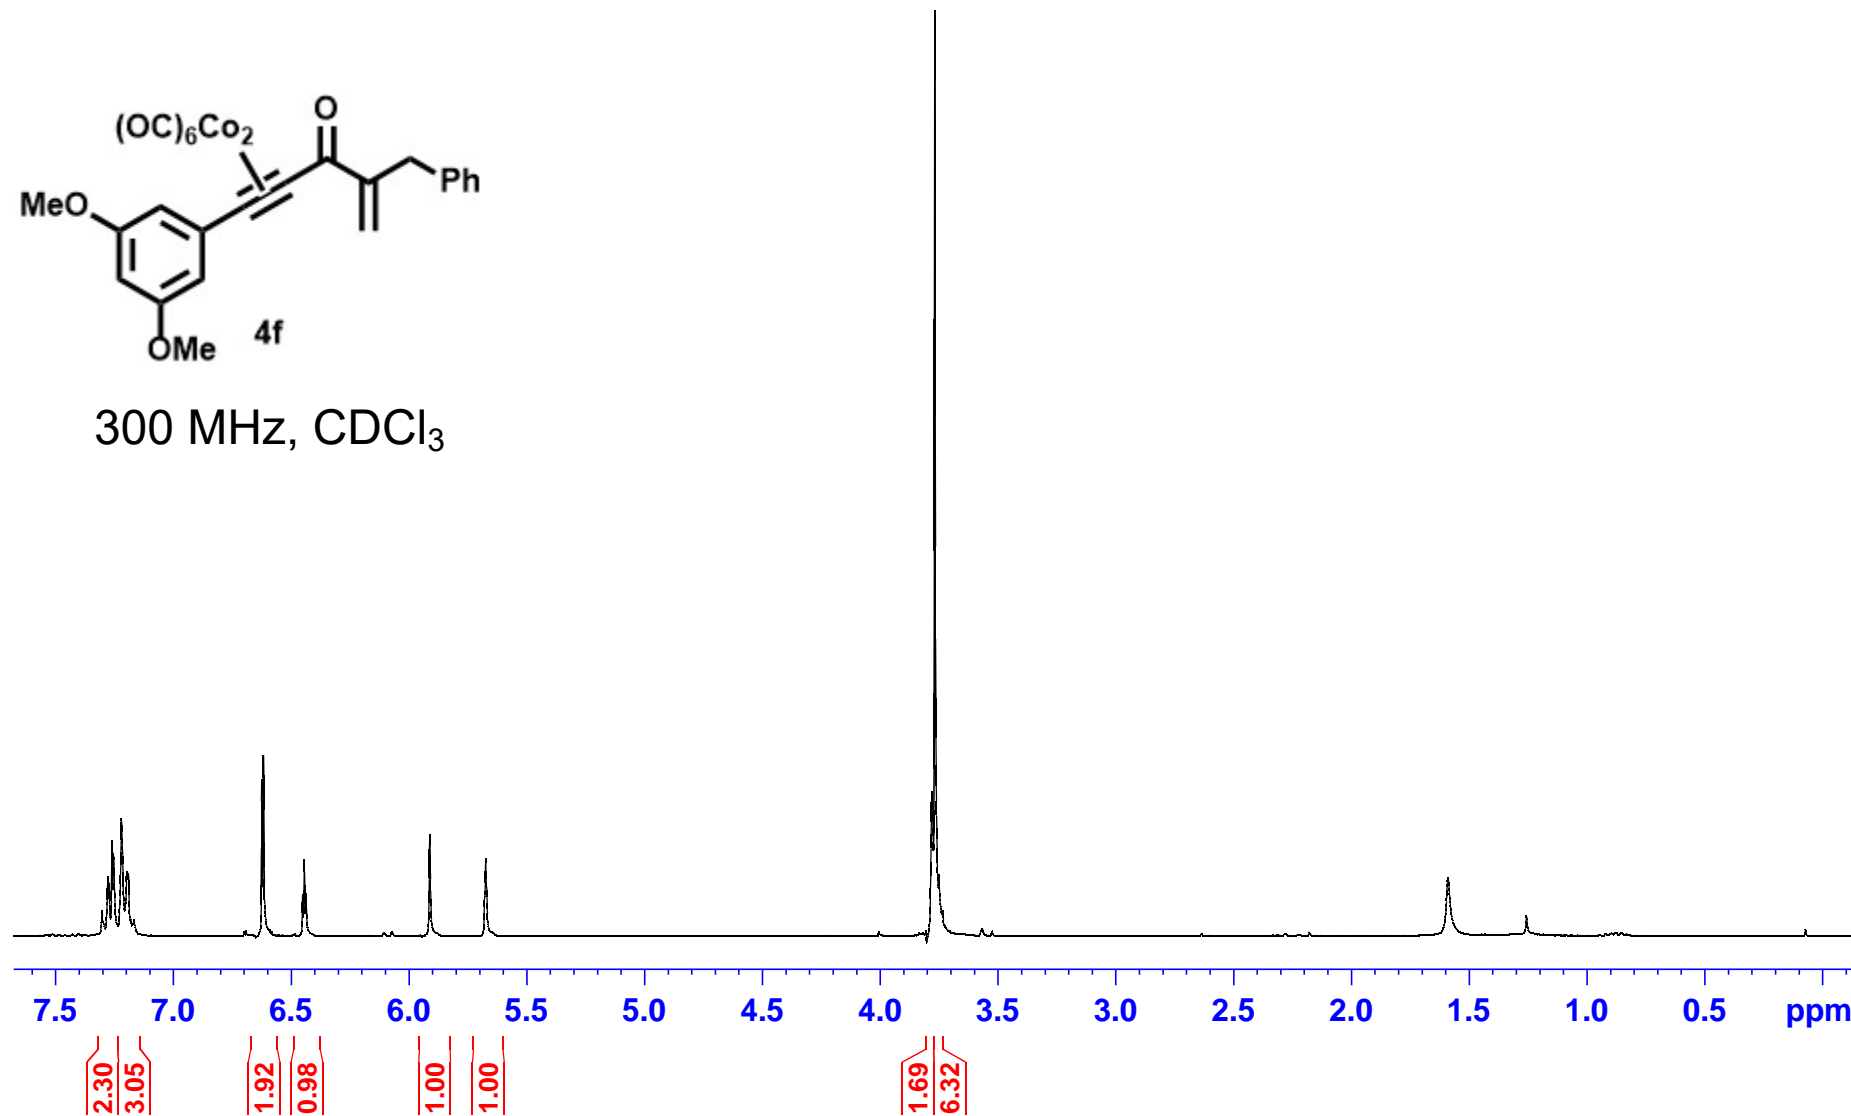



dimethoxy\_cc\_cobalt\_benzyl\_f1\_C13\_1

300US

198.223  
194.311

161.114

148.463

138.986  
138.619

129.153  
128.605  
126.500  
125.825

107.997

100.713

92.274

86.323

55.495

38.300

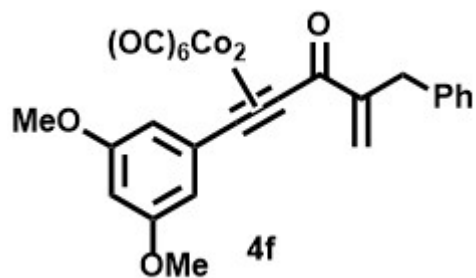

75 MHz, CDCl<sub>3</sub>

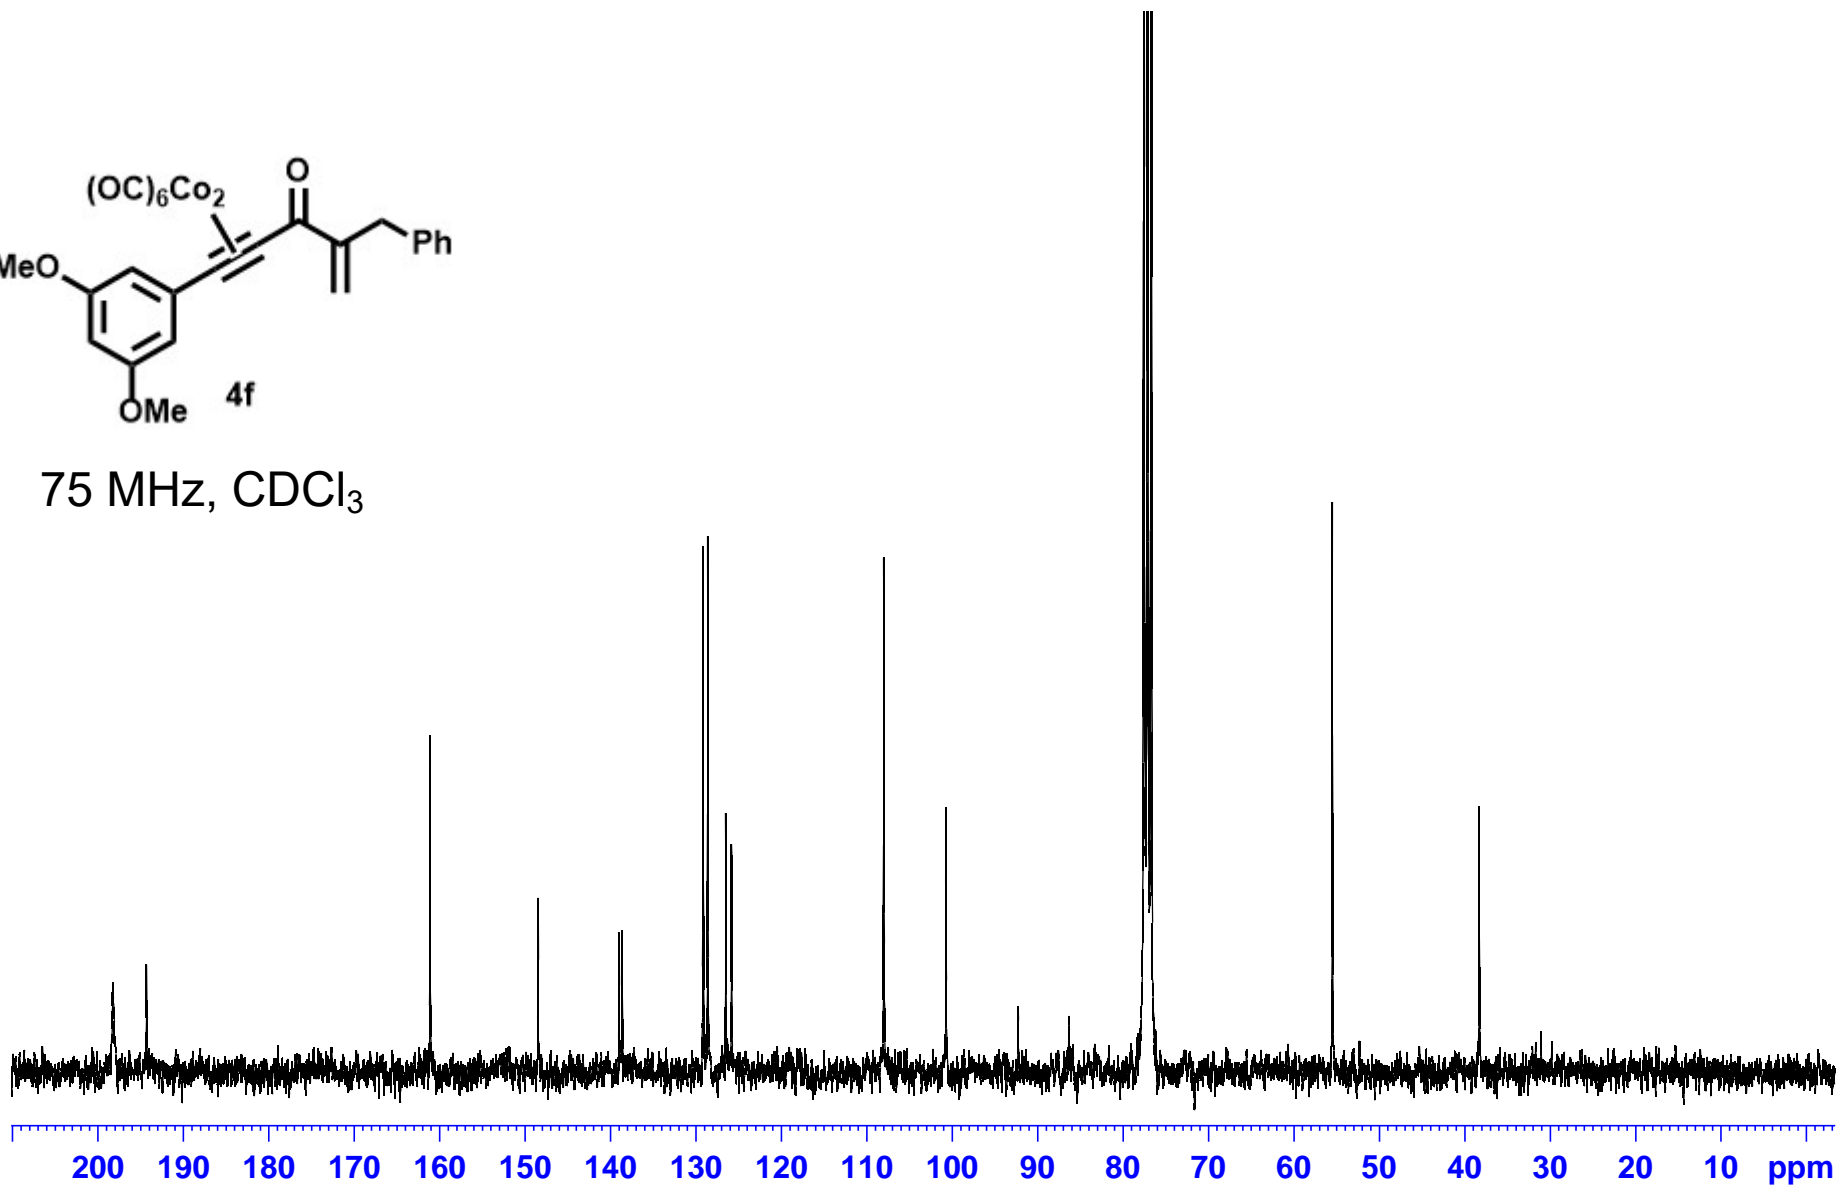

som.08f 1 1H, (MeO)2Ph-CC-CH(O)-C(iPr)=CH2]-Co2, 9/4/21

7.270  
6.674  
6.670  
6.474  
6.470  
6.465  
5.832  
5.660  
5.657  
3.801  
3.120  
3.107  
3.094  
3.080  
3.066  
1.122  
1.108

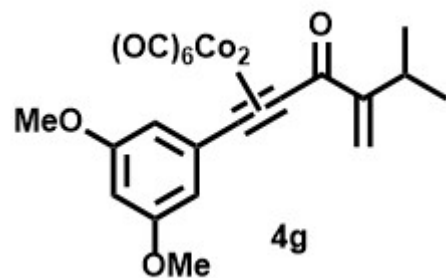

500 MHz, CDCl<sub>3</sub>

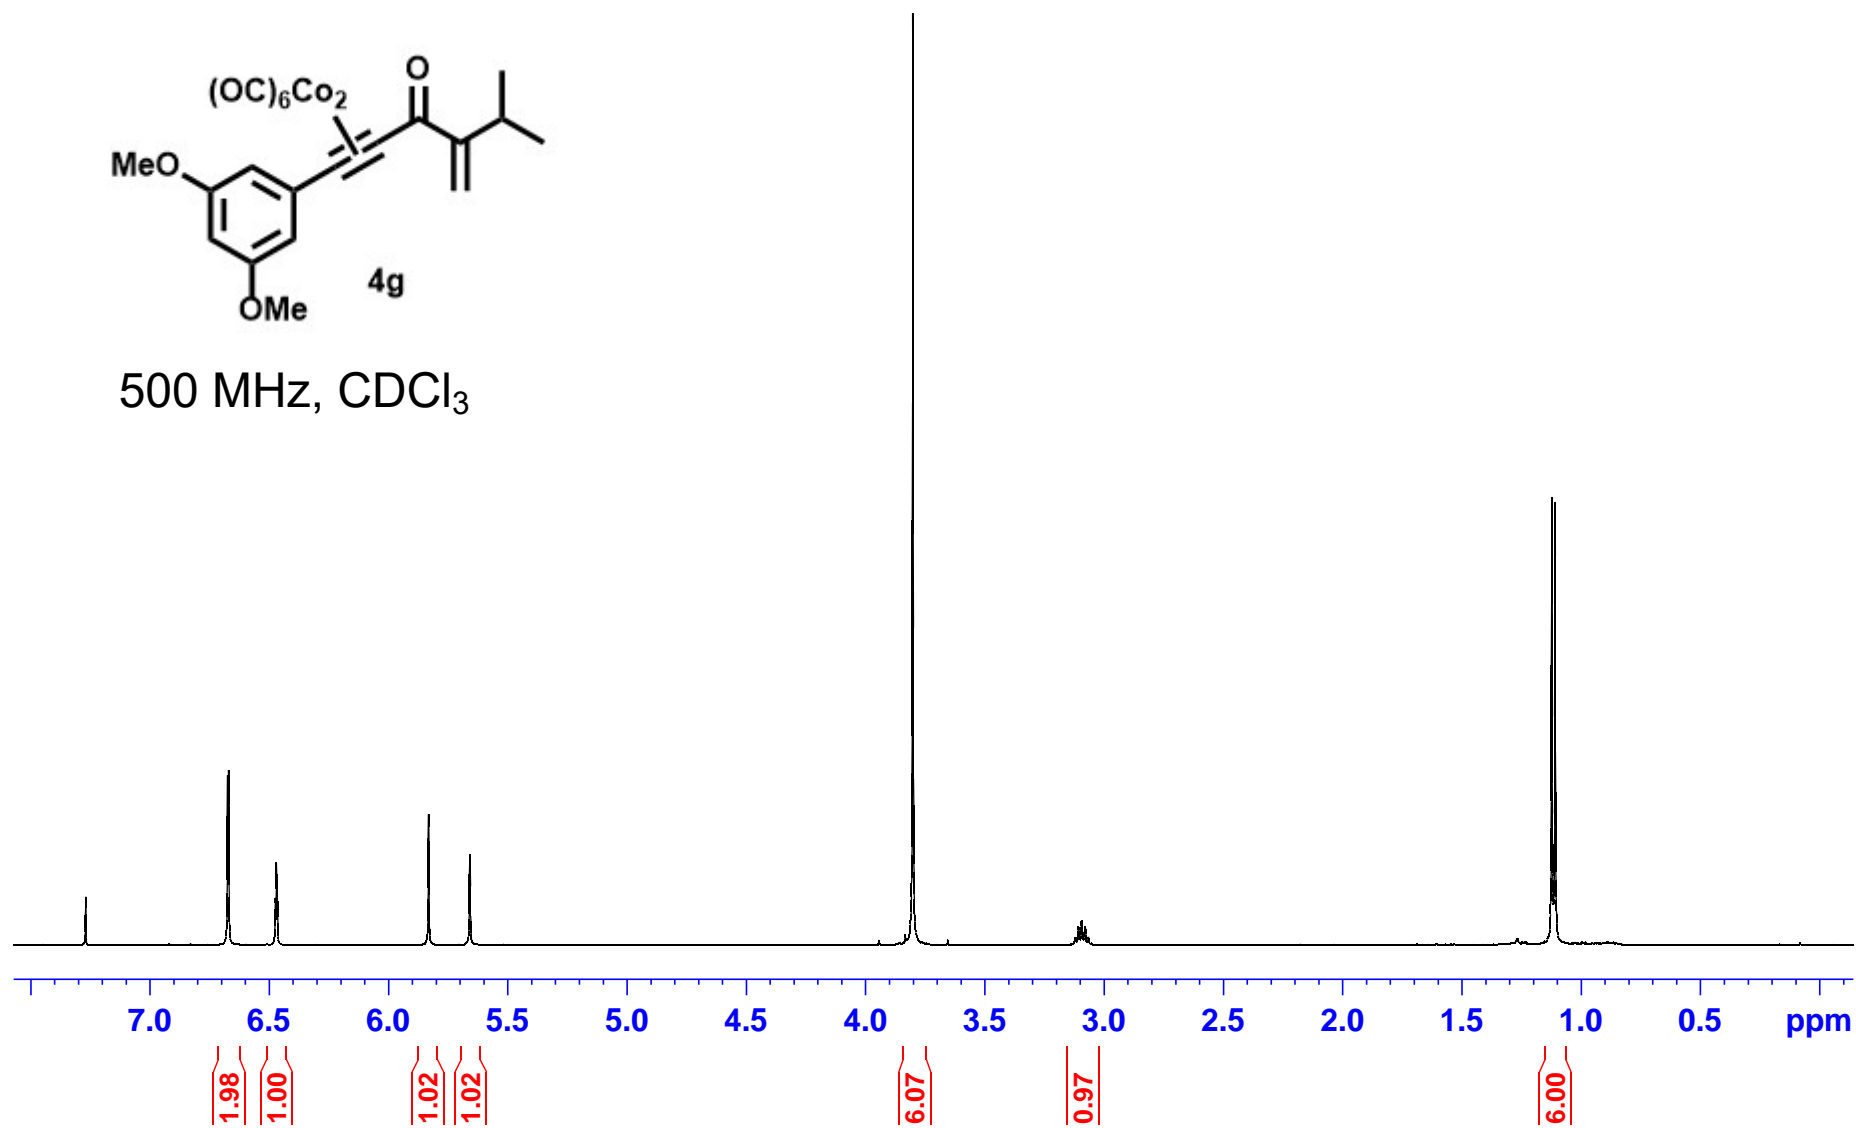

som.08f 2, <sup>13</sup>C, (MeO)<sub>2</sub>Ph-CC-C(O)-C(iPr)=CH<sub>2</sub>]-Co<sub>2</sub>, 9/4/21

198.275  
195.399  
160.990  
155.340  
138.915  
121.239  
107.888  
100.585  
92.280  
87.608  
77.250  
76.996  
76.742  
55.368  
29.070  
21.431

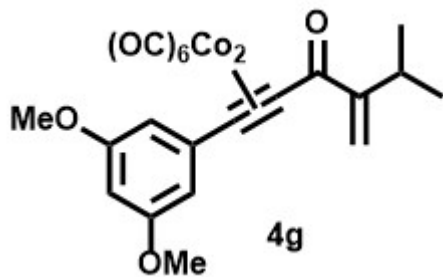

4g

125 MHz, CDCl<sub>3</sub>

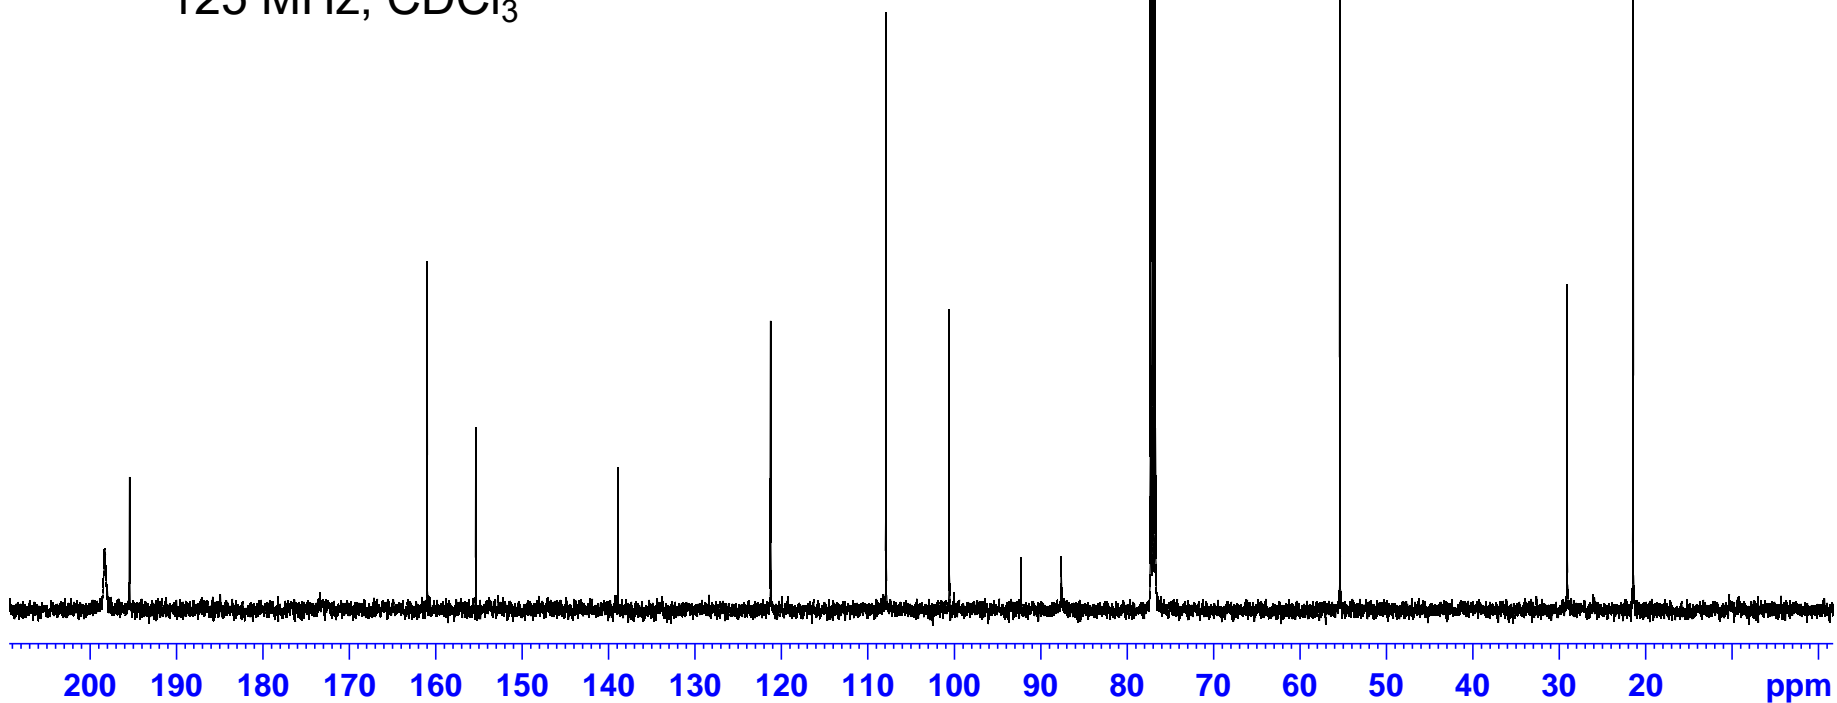

som.08g 1, 1H, (MeO)2Ph-CC-C(O)-C(TIPS)=Ch2]-Co2, B82, 9/26/21

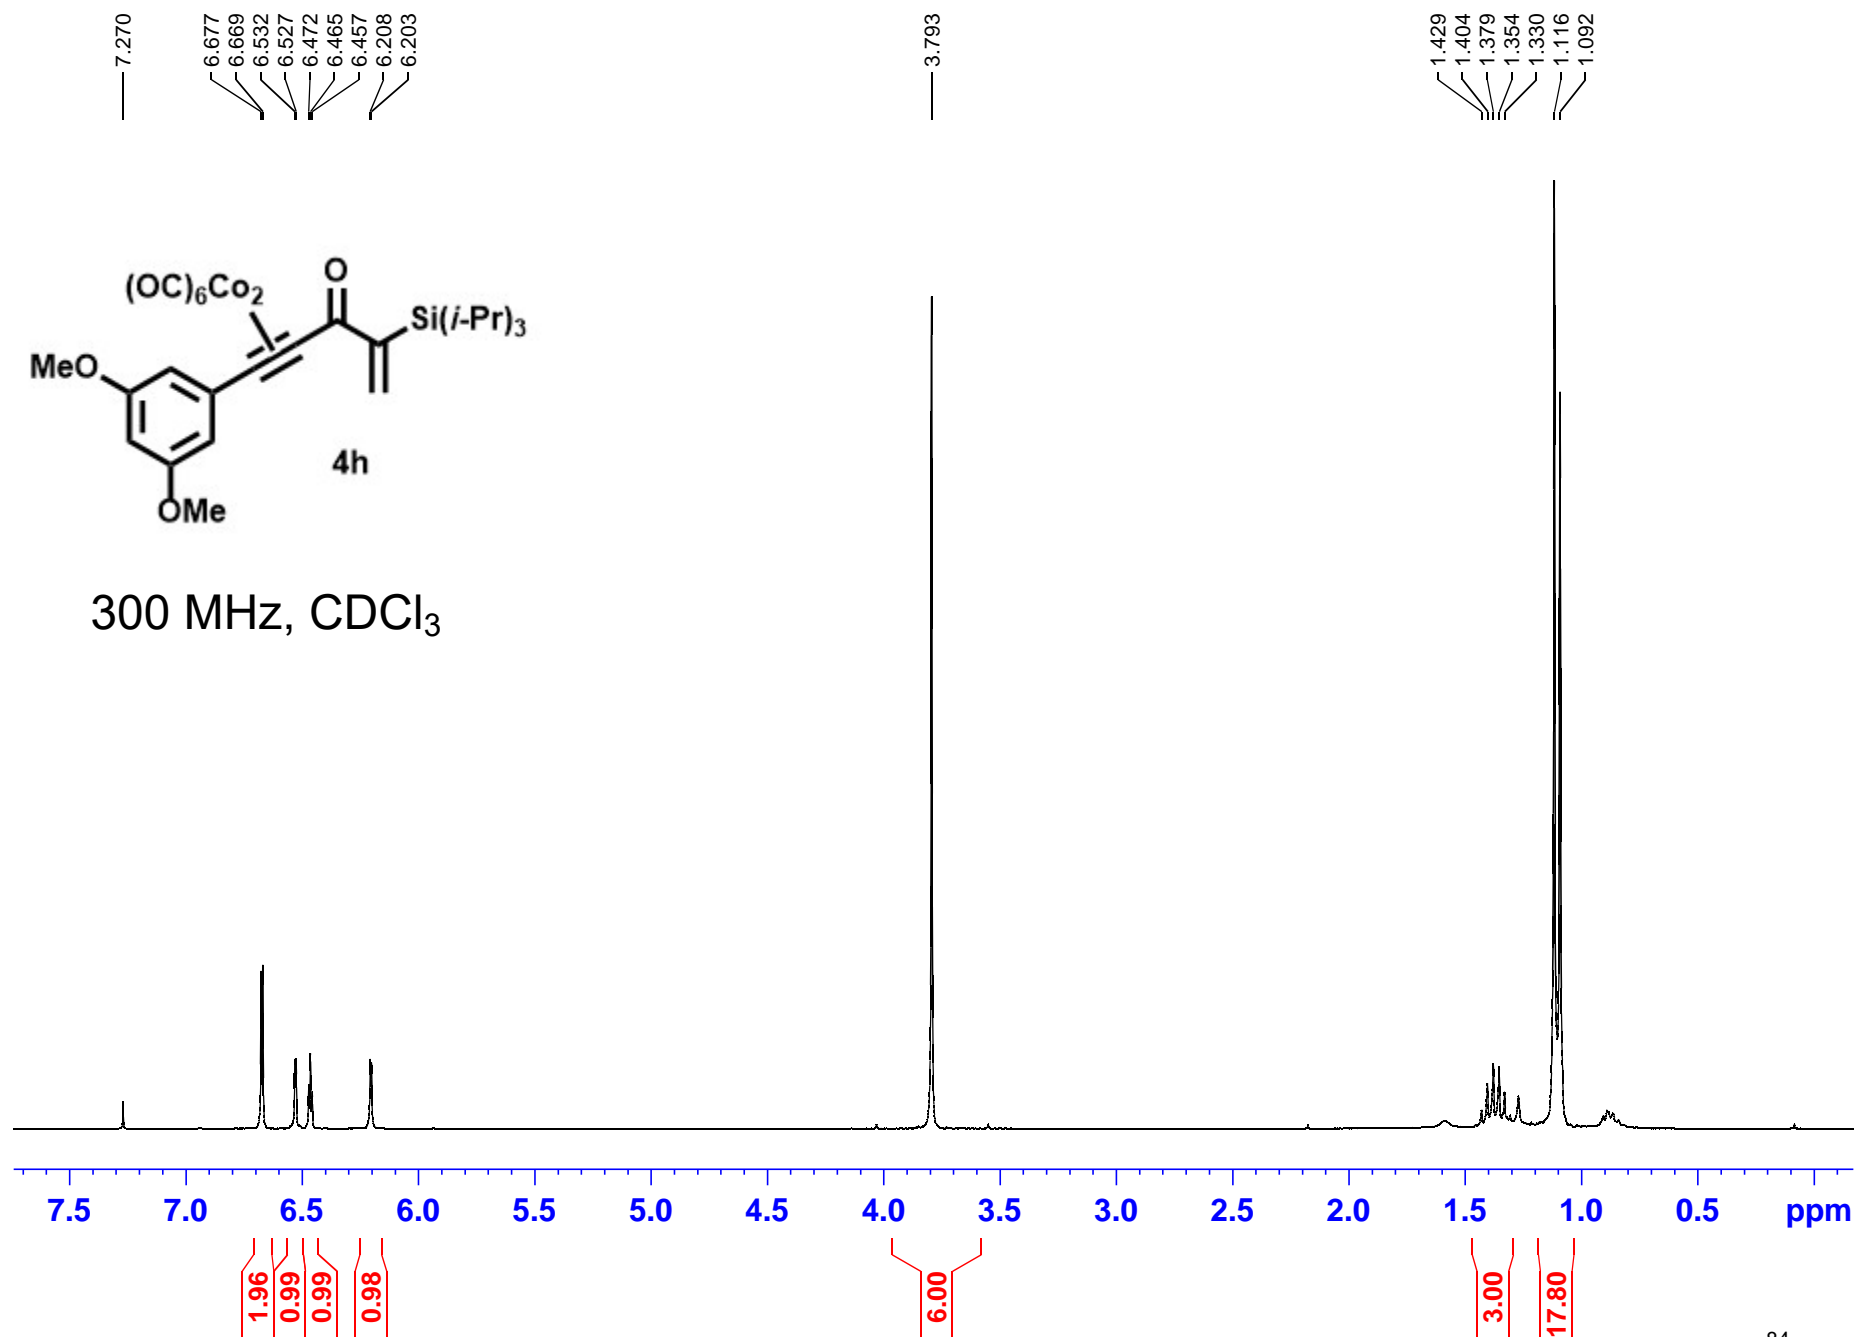

som.08g 2, <sup>13</sup>C, (MeO)<sub>2</sub>Ph-CC-C(O)-C(TIPS)=CH<sub>2</sub>]-Co<sub>2</sub>, B82, 9/26/21

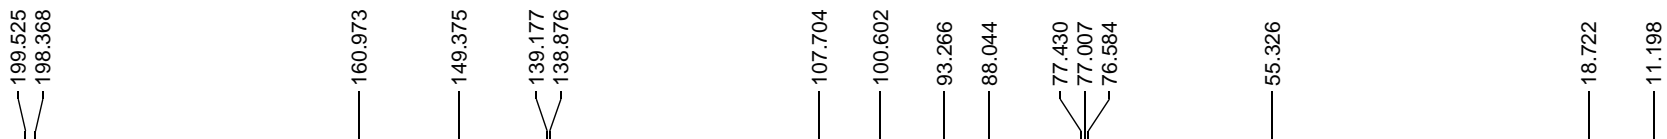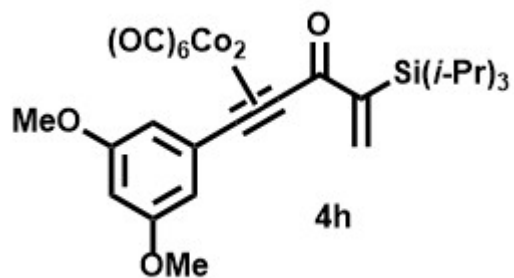

75 MHz, CDCl<sub>3</sub>

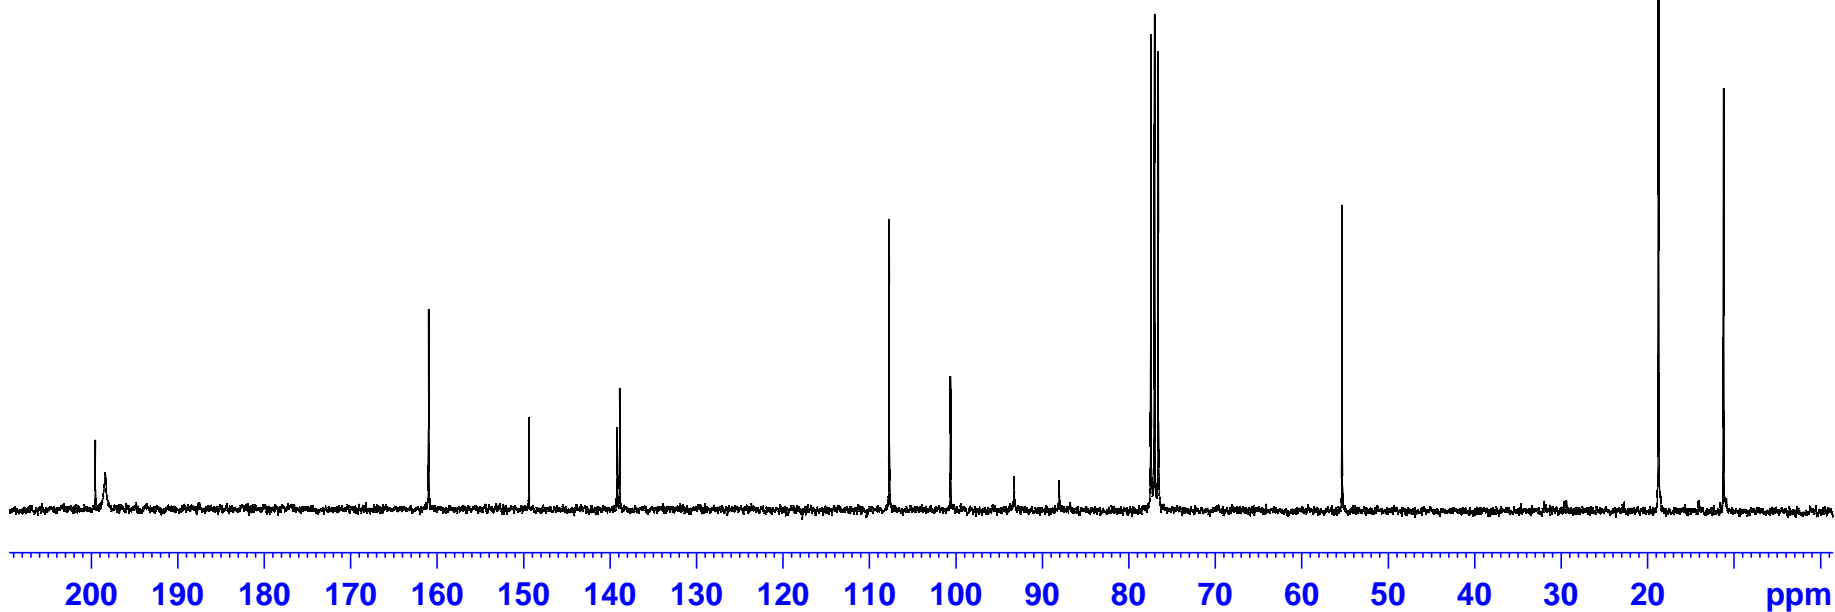

som.08i 1, cyclohexenyl-CC-C(O)-C(Me)=CH2]-Co2, B82, 8/18/21

7.270  
6.227  
5.879  
5.877  
5.842  
5.839  
5.837  
5.834

2.260  
2.254  
2.170  
2.157  
2.038  
2.035  
2.034  
2.031  
1.741  
1.734  
1.714  
1.692  
1.686

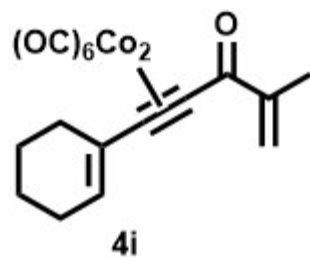

300 MHz, CDCl<sub>3</sub>

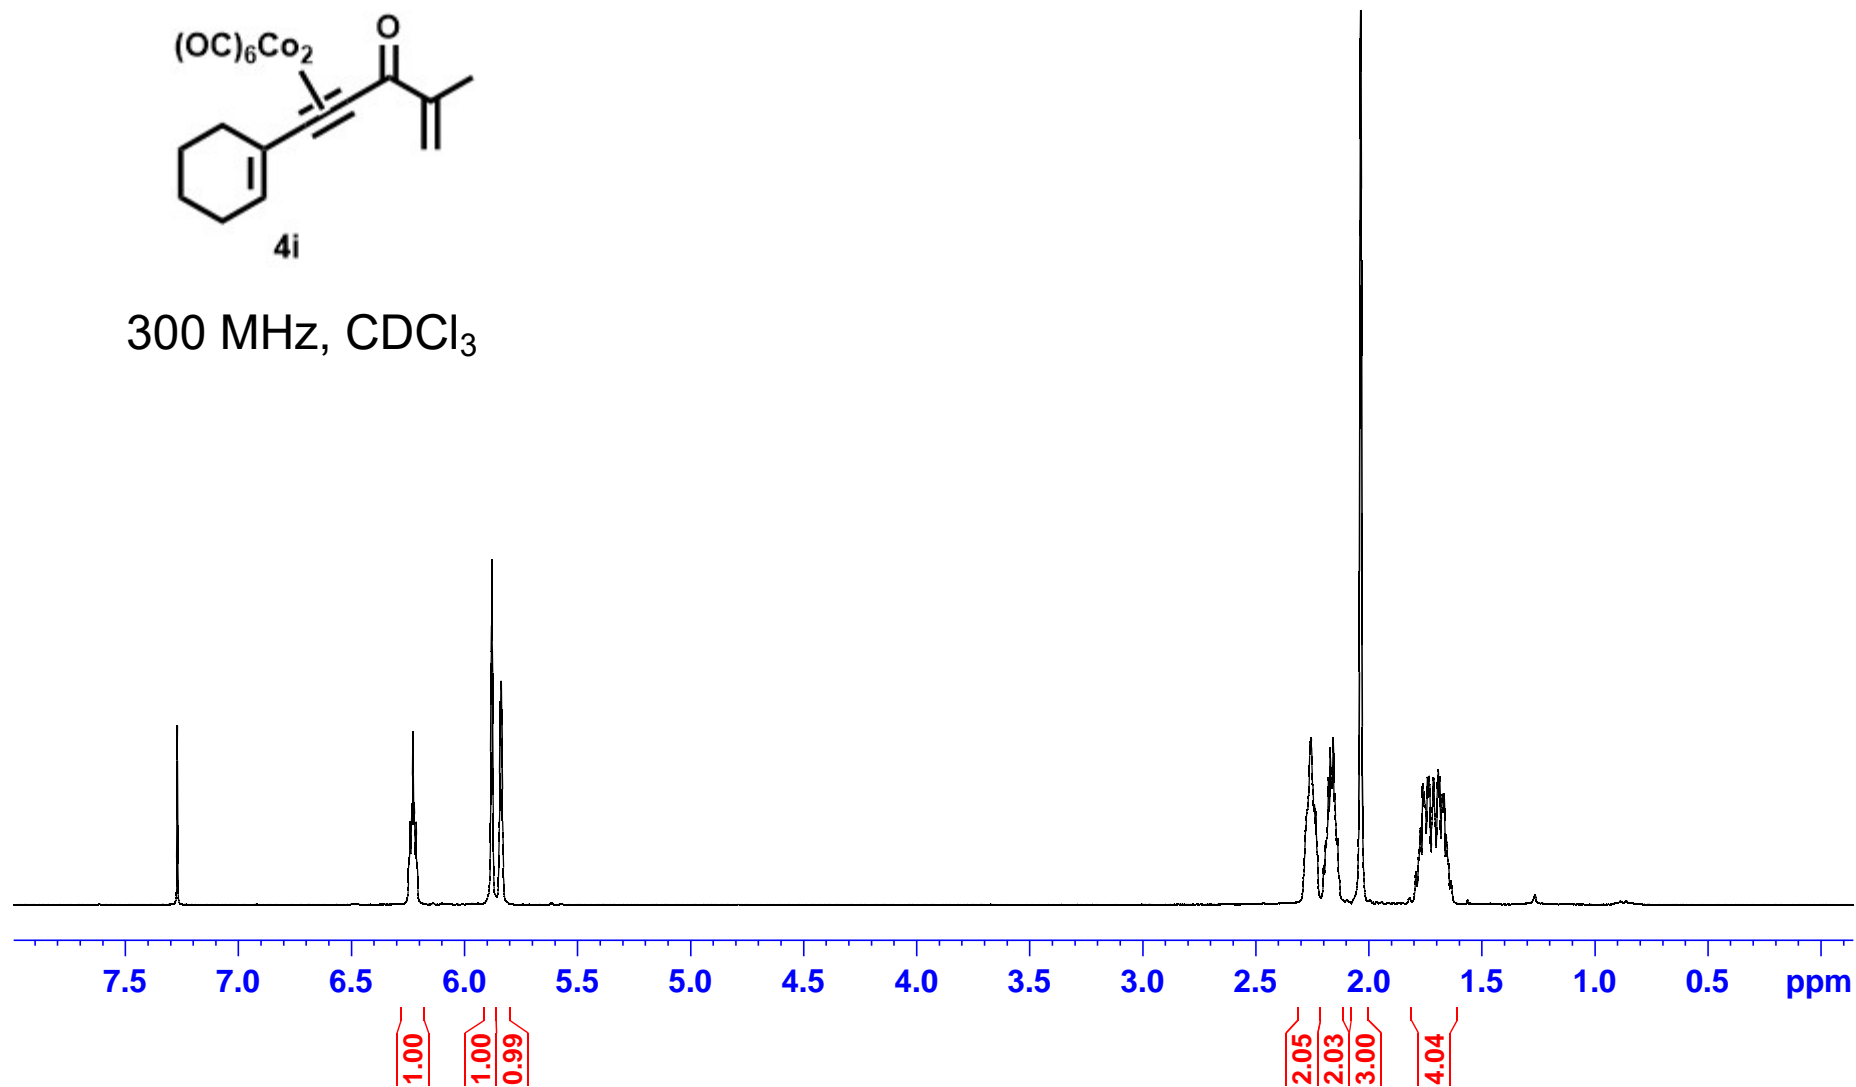

som.08i 2, <sup>13</sup>C, cyclohexenyl-CC-C(O)-C(Me)=CH<sub>2</sub>]-Co<sub>2</sub>, B82, 8/18/21

198.734  
194.797

144.575

133.949  
131.729

125.269

96.584

86.528

77.425  
77.001  
76.578

30.703  
26.374  
22.945  
21.900  
18.386

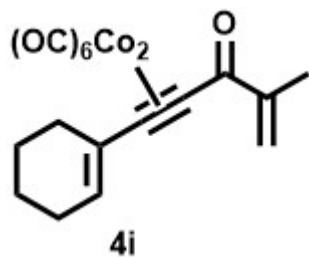

75 MHz, CDCl<sub>3</sub>

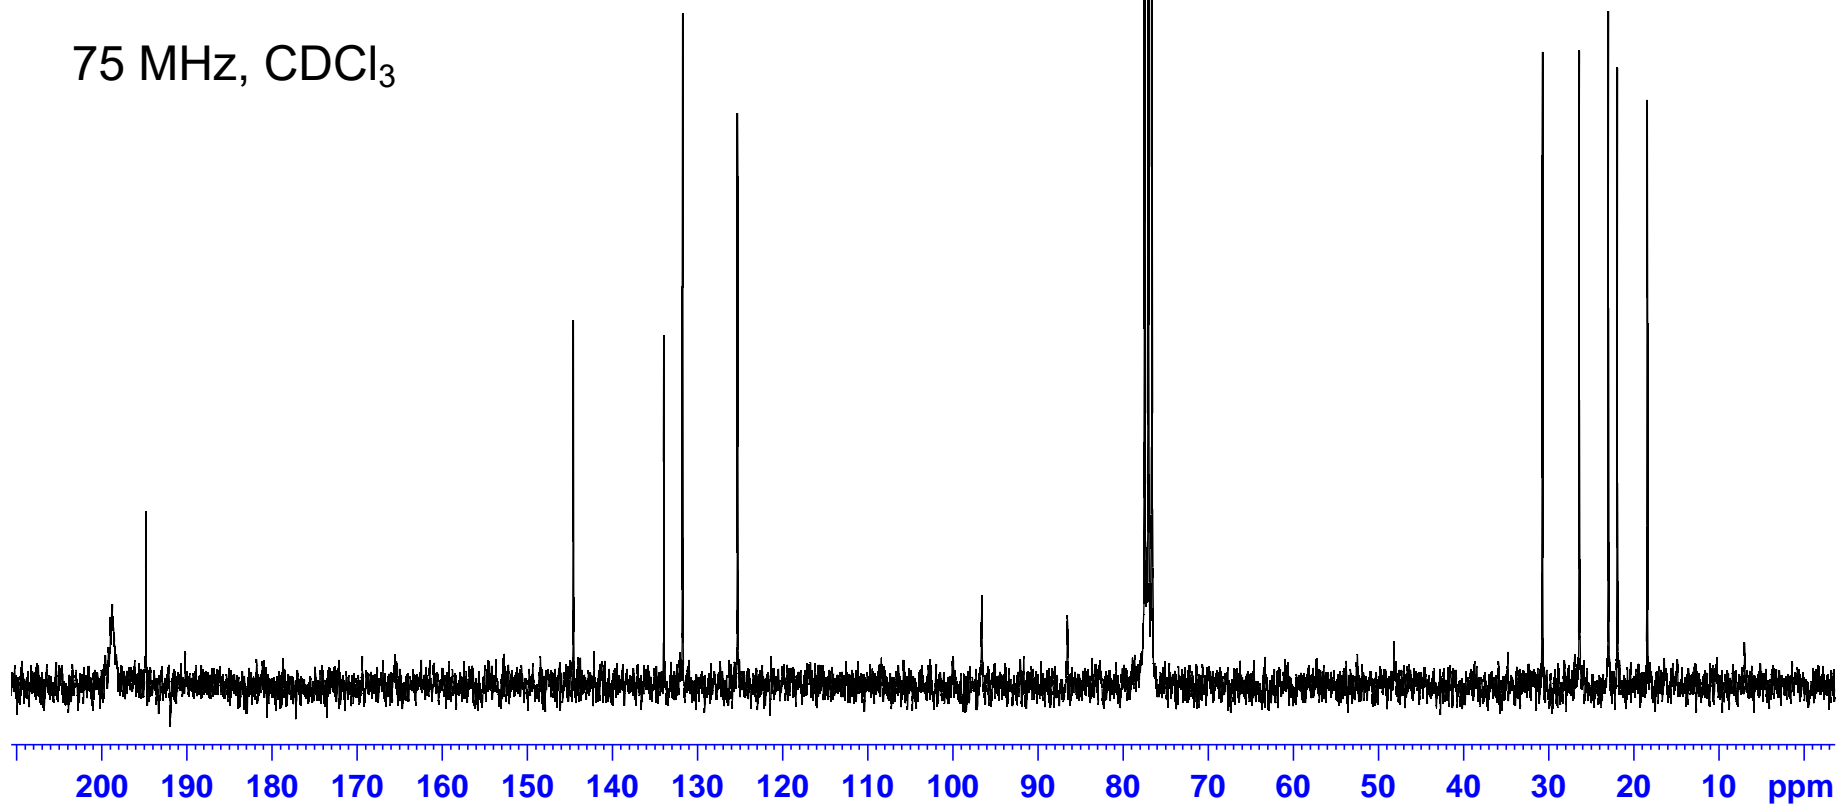

som.08j, 1H, cyclohexenyl-CC-C(O)-C(TIPS)=CH2]- Co2, 500, 8/13/21

7.270  
6.535  
6.531  
6.225  
6.222

2.270  
2.267  
2.171  
2.164  
1.762  
1.750  
1.692  
1.688  
1.680  
1.395  
1.380  
1.365  
1.350  
1.335  
1.101  
1.086

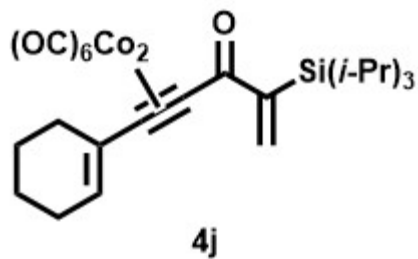

500 MHz, CDCl<sub>3</sub>

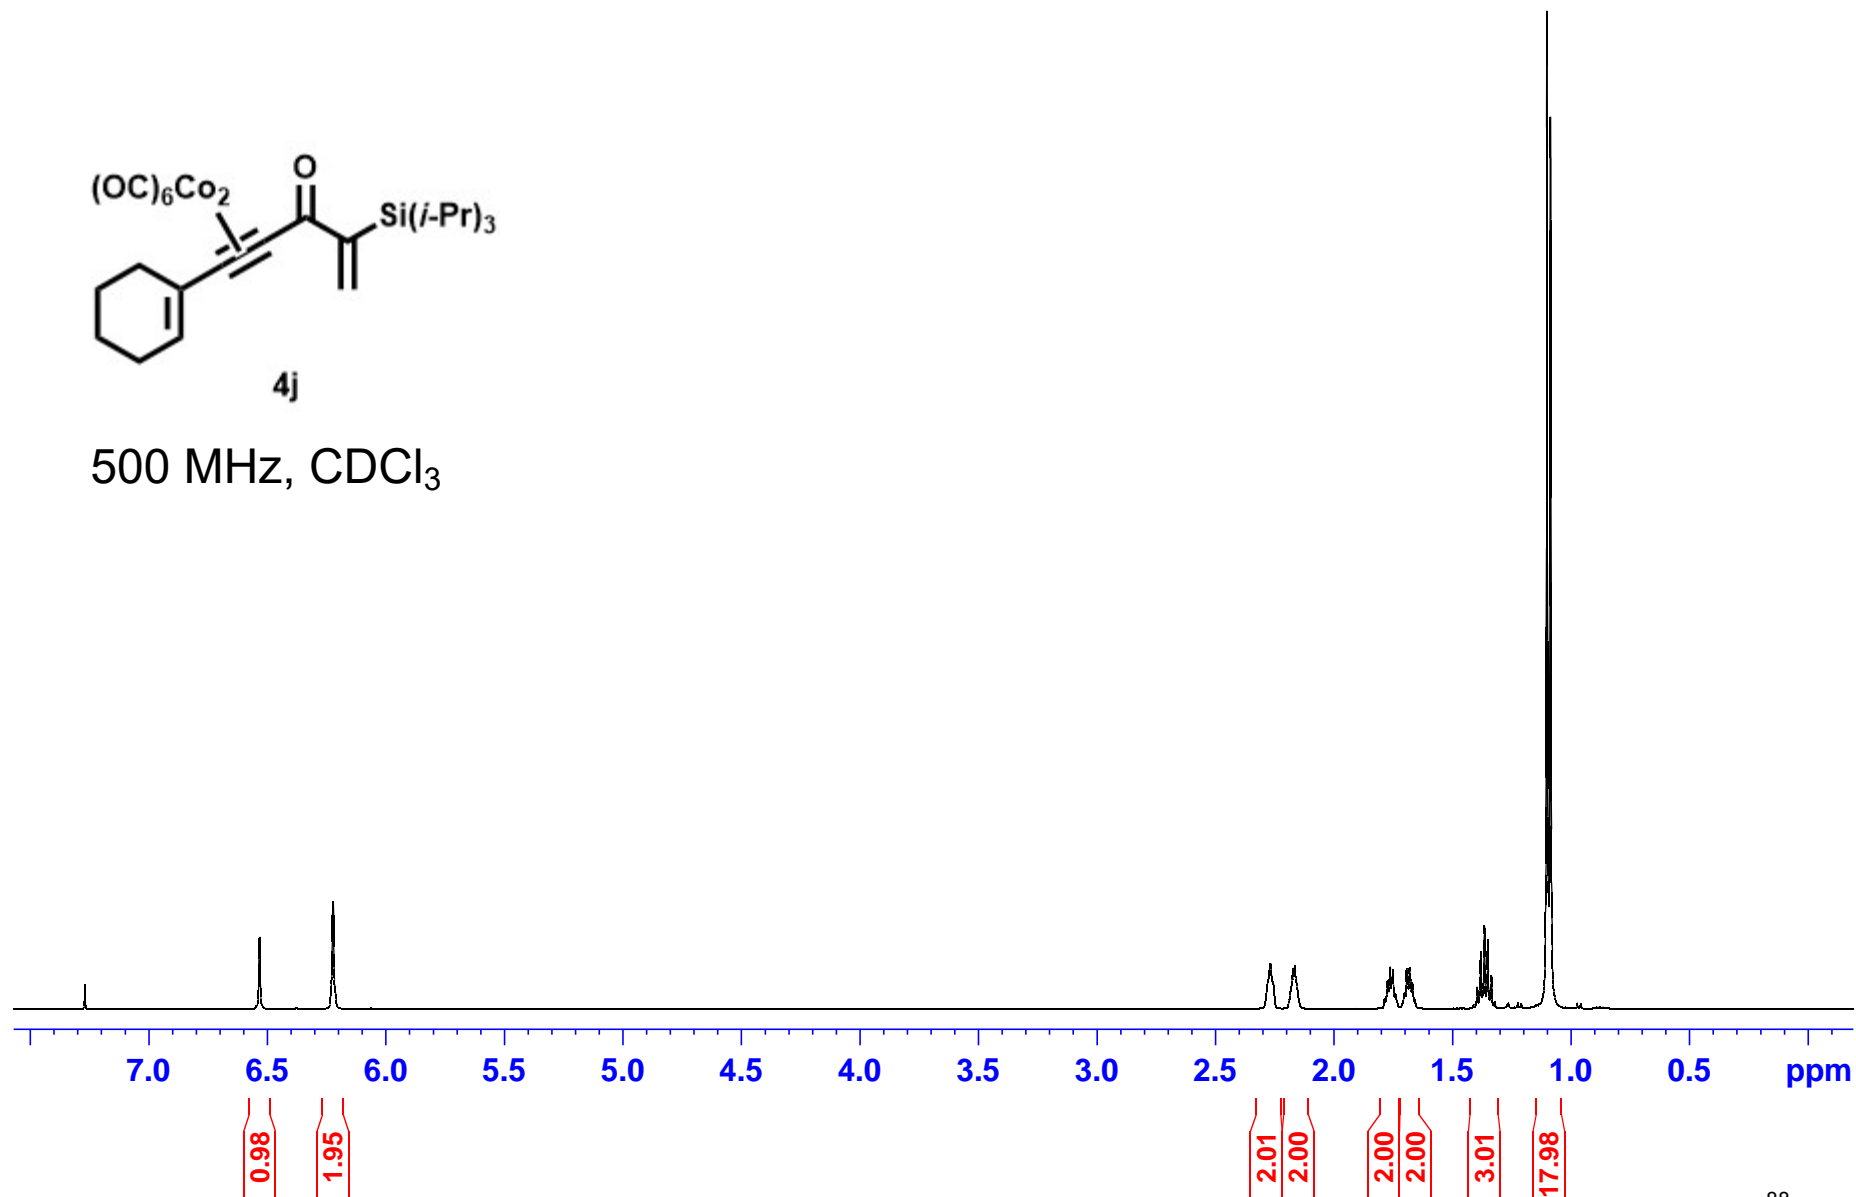



som.08j 3, <sup>13</sup>C, cyclohexenyl-CC-C(O)-C(TIPS)=CH<sub>2</sub>]-Co<sub>2</sub>, 500, 8/12/21

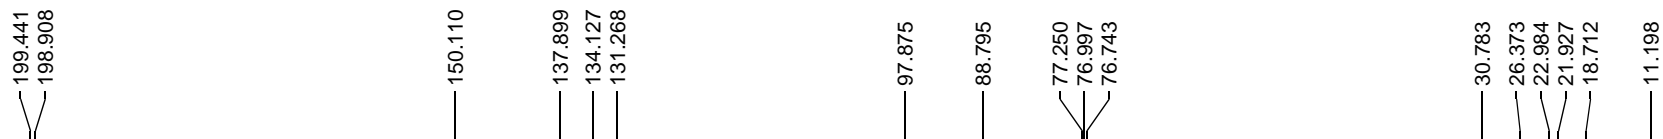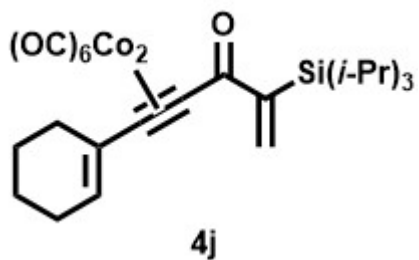

125 MHz, CDCl<sub>3</sub>

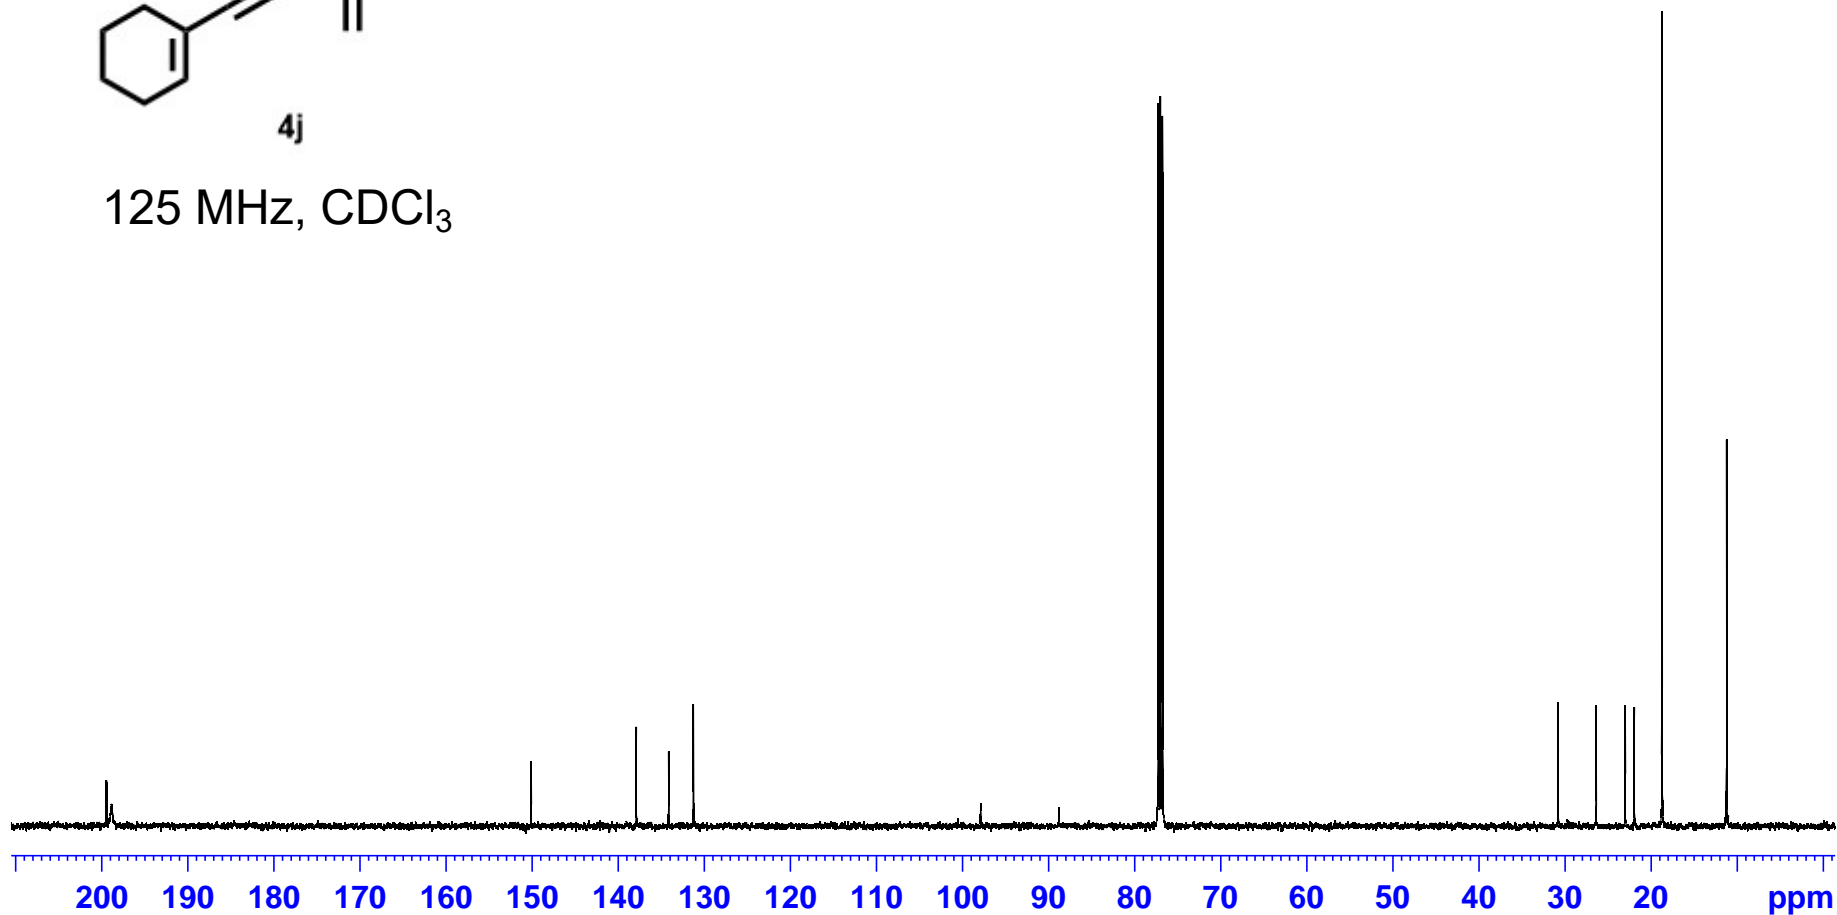

som.04k 1, 1H, (MeO)2Ph-CC-C(O)-C(Me)=CHMe]-Co2, B82, 9/27/21

7.270  
6.777  
6.758  
6.754  
6.734  
6.730  
6.711  
6.677  
6.669  
6.477  
6.469  
6.462

3.802

1.970  
1.801  
1.778

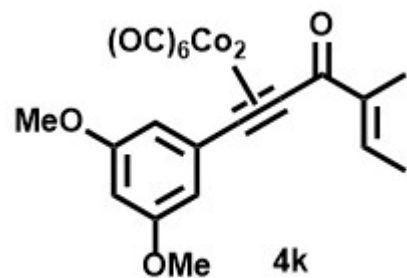

300 MHz,  $CDCl_3$

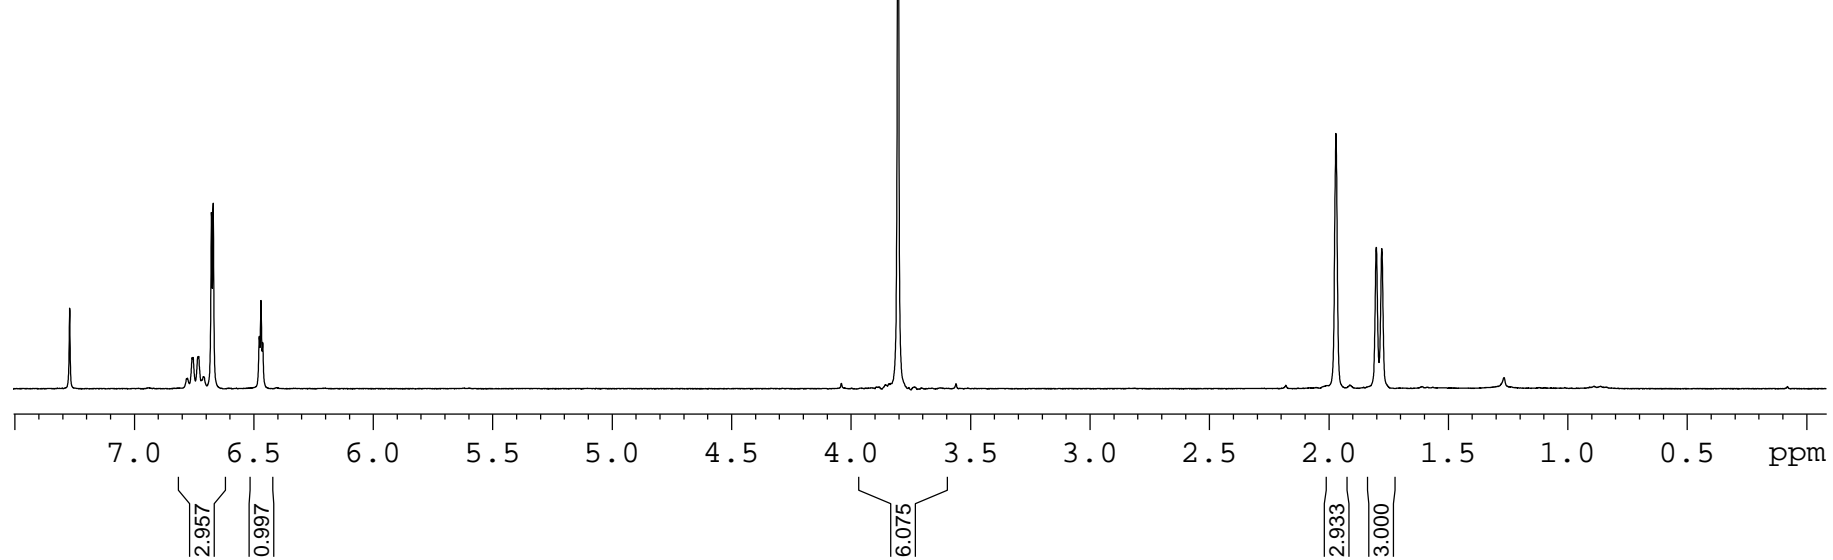

som.04k 2, <sup>13</sup>C, (MeO)<sub>2</sub>Ph-CC-C(O)-C(Me)=CHMe]-Co<sub>2</sub>, B82, 9/27/21

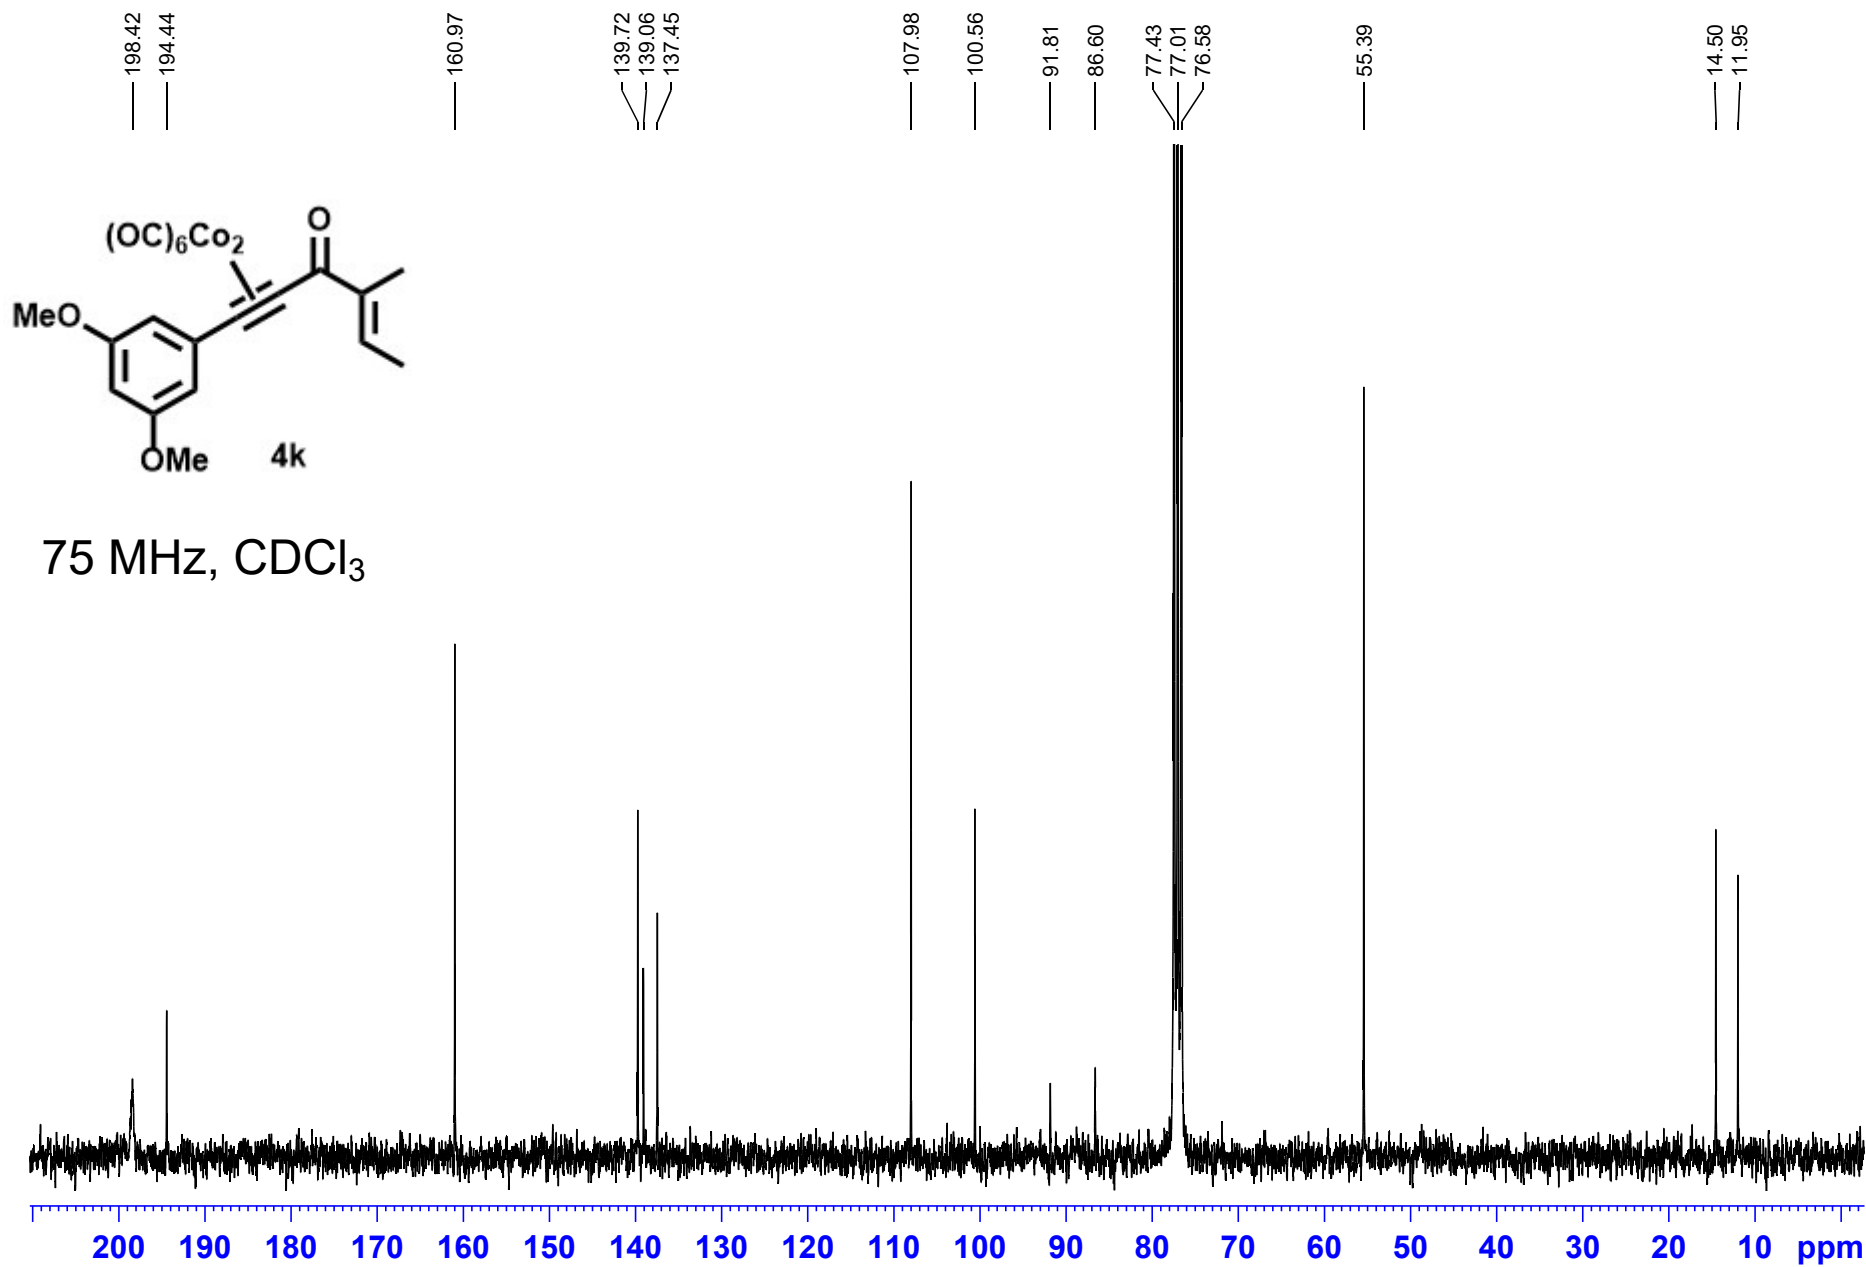

som.0727 3, MeOPh-CC-C(O)-C(Me)=CH2]-Co2 cyclizn, maj fr, 300 B82, 7/27/21

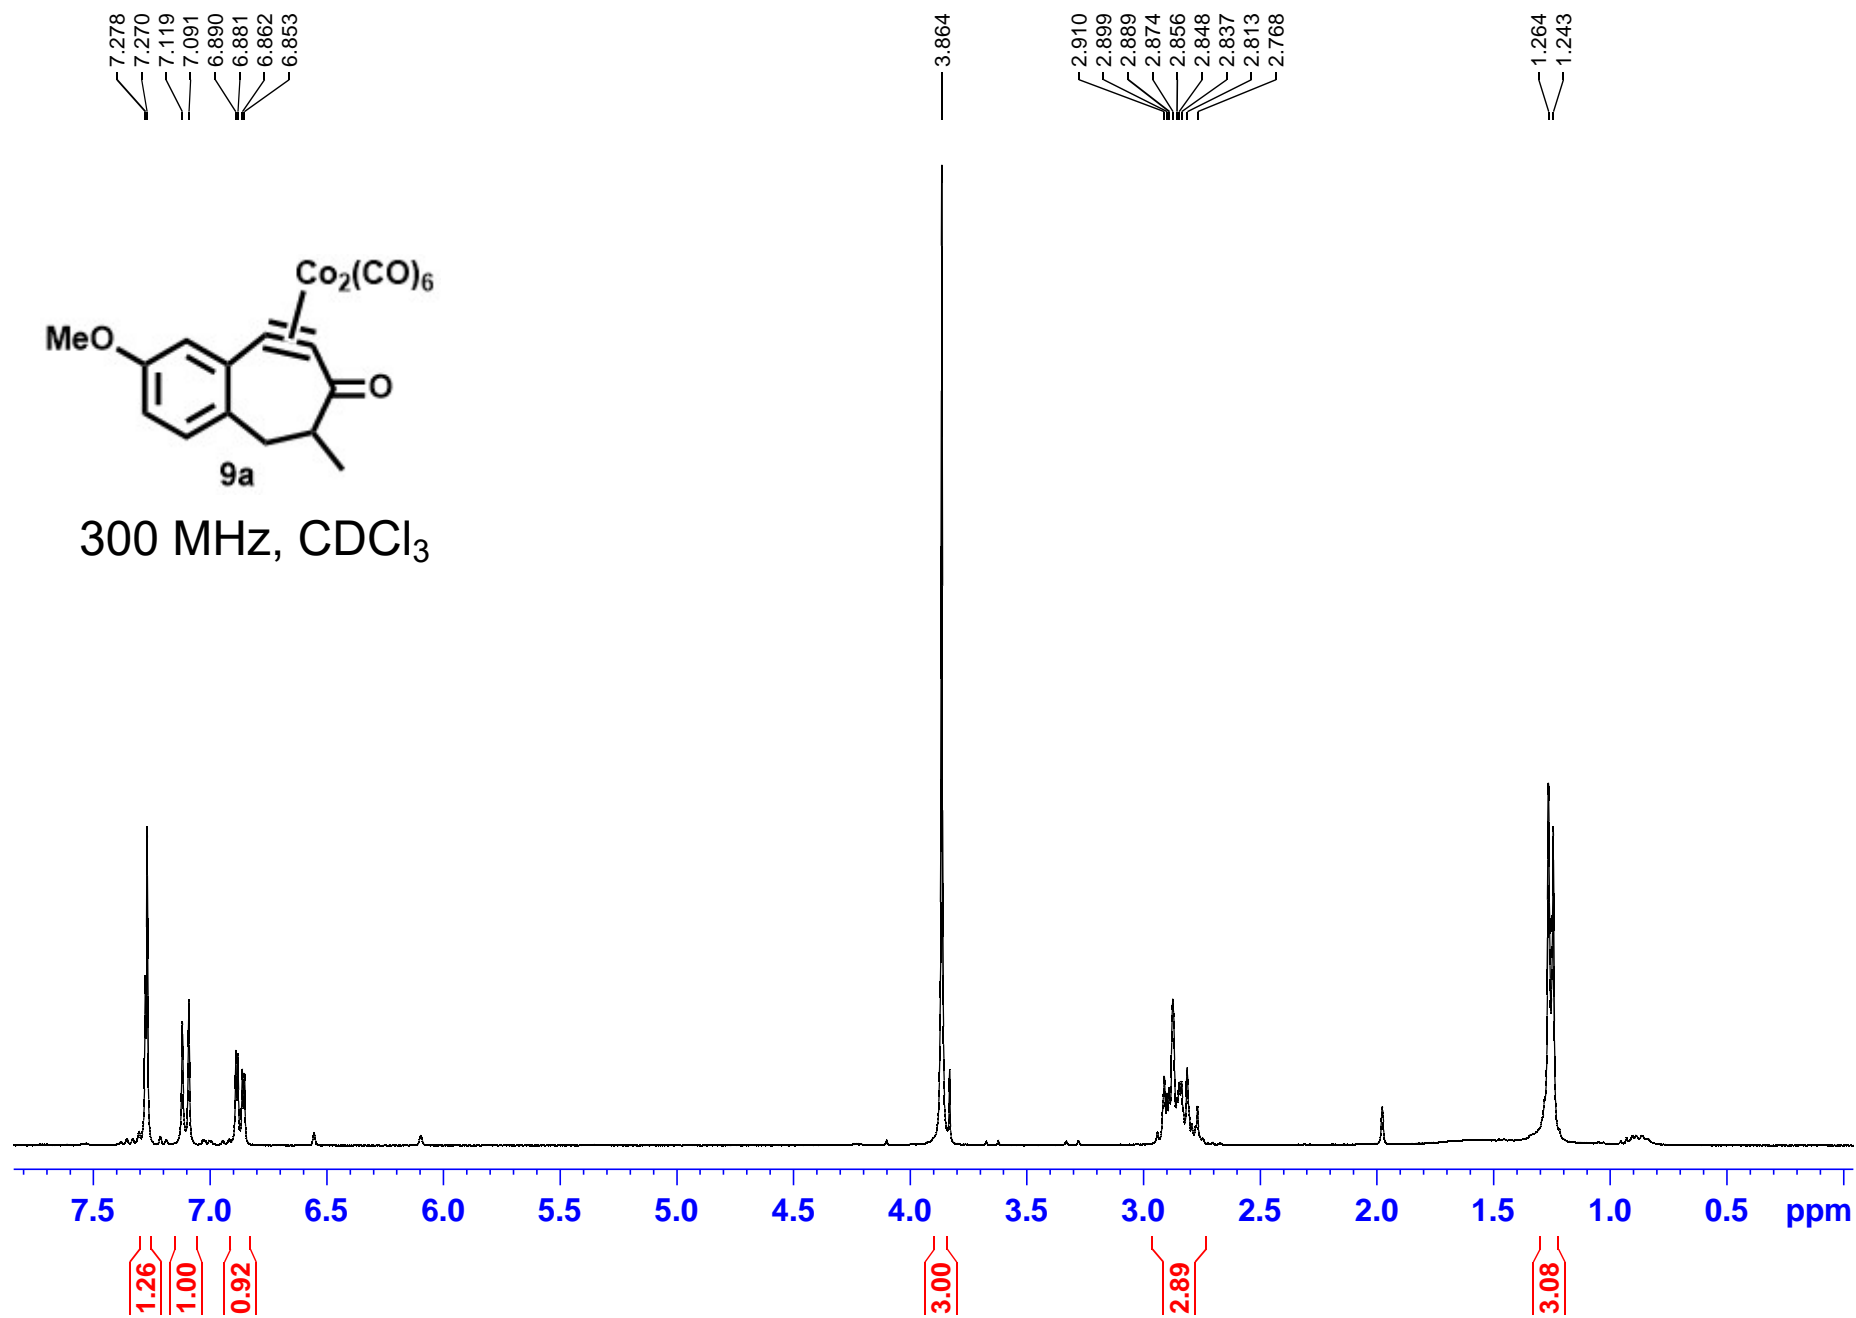

som.0727 2, <sup>13</sup>C, p-cyclizn prod, mono OMe, 7/27/21

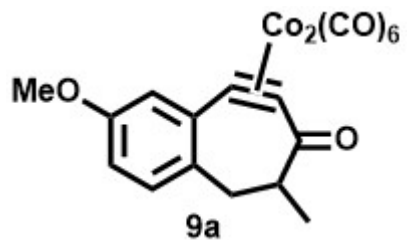

75 MHz, CDCl<sub>3</sub>

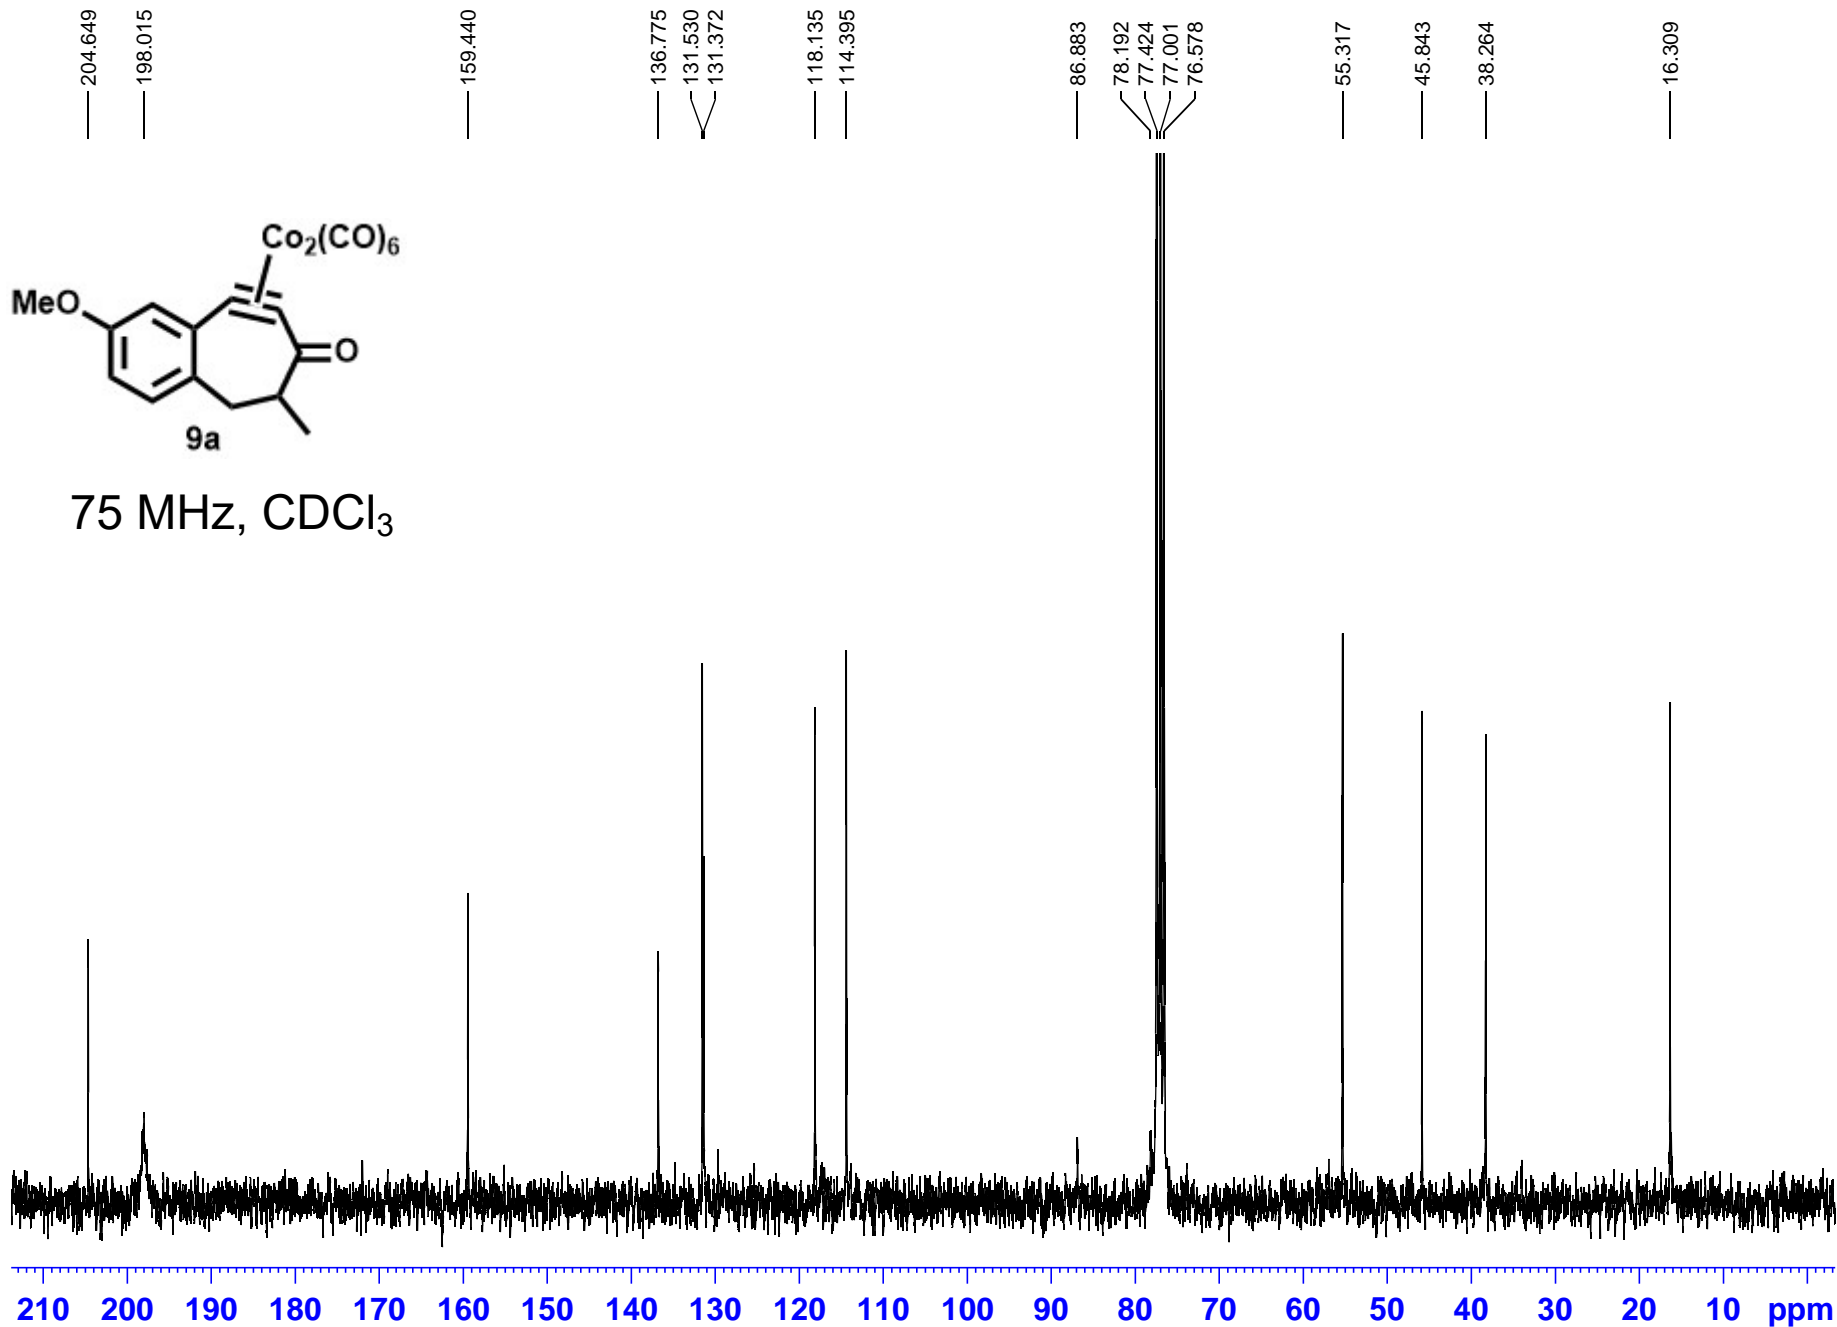

som.0728 1, minor prod, monoOMe Nazarov, 1H 500, 7/28/21

7.376  
7.362  
7.327  
7.311  
7.295  
7.270  
6.942  
6.926

3.872

3.320  
3.288  
2.848  
2.834  
2.829  
2.815  
2.743  
2.723  
2.711  
2.691

1.278  
1.264

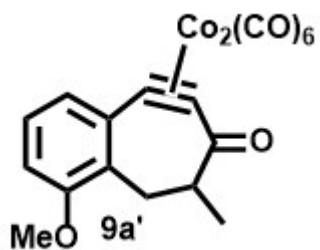

500 MHz,  $\text{CDCl}_3$

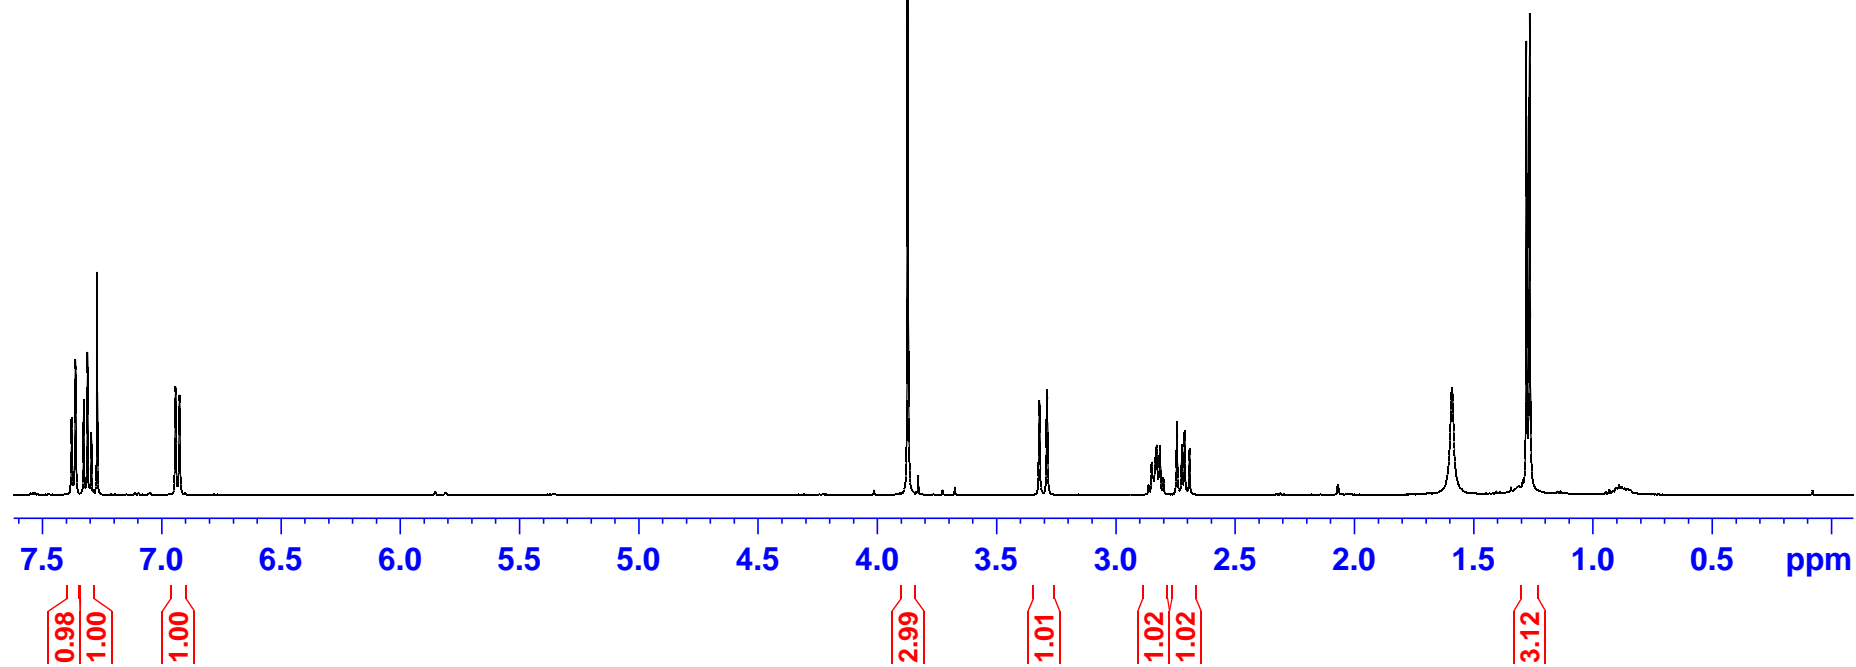

som.0728 2, 13C, mono OMe Nazarov, minor prod, 500, 7/28/21

205.091  
198.272  
156.841  
137.158  
128.263  
127.695  
125.449  
111.169  
87.636  
77.956  
77.248  
76.995  
76.741  
55.904  
45.492  
28.397  
16.308

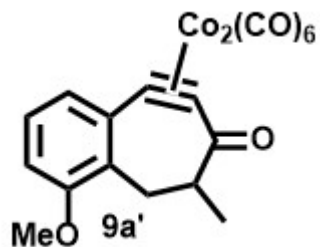

125 MHz, CDCl<sub>3</sub>

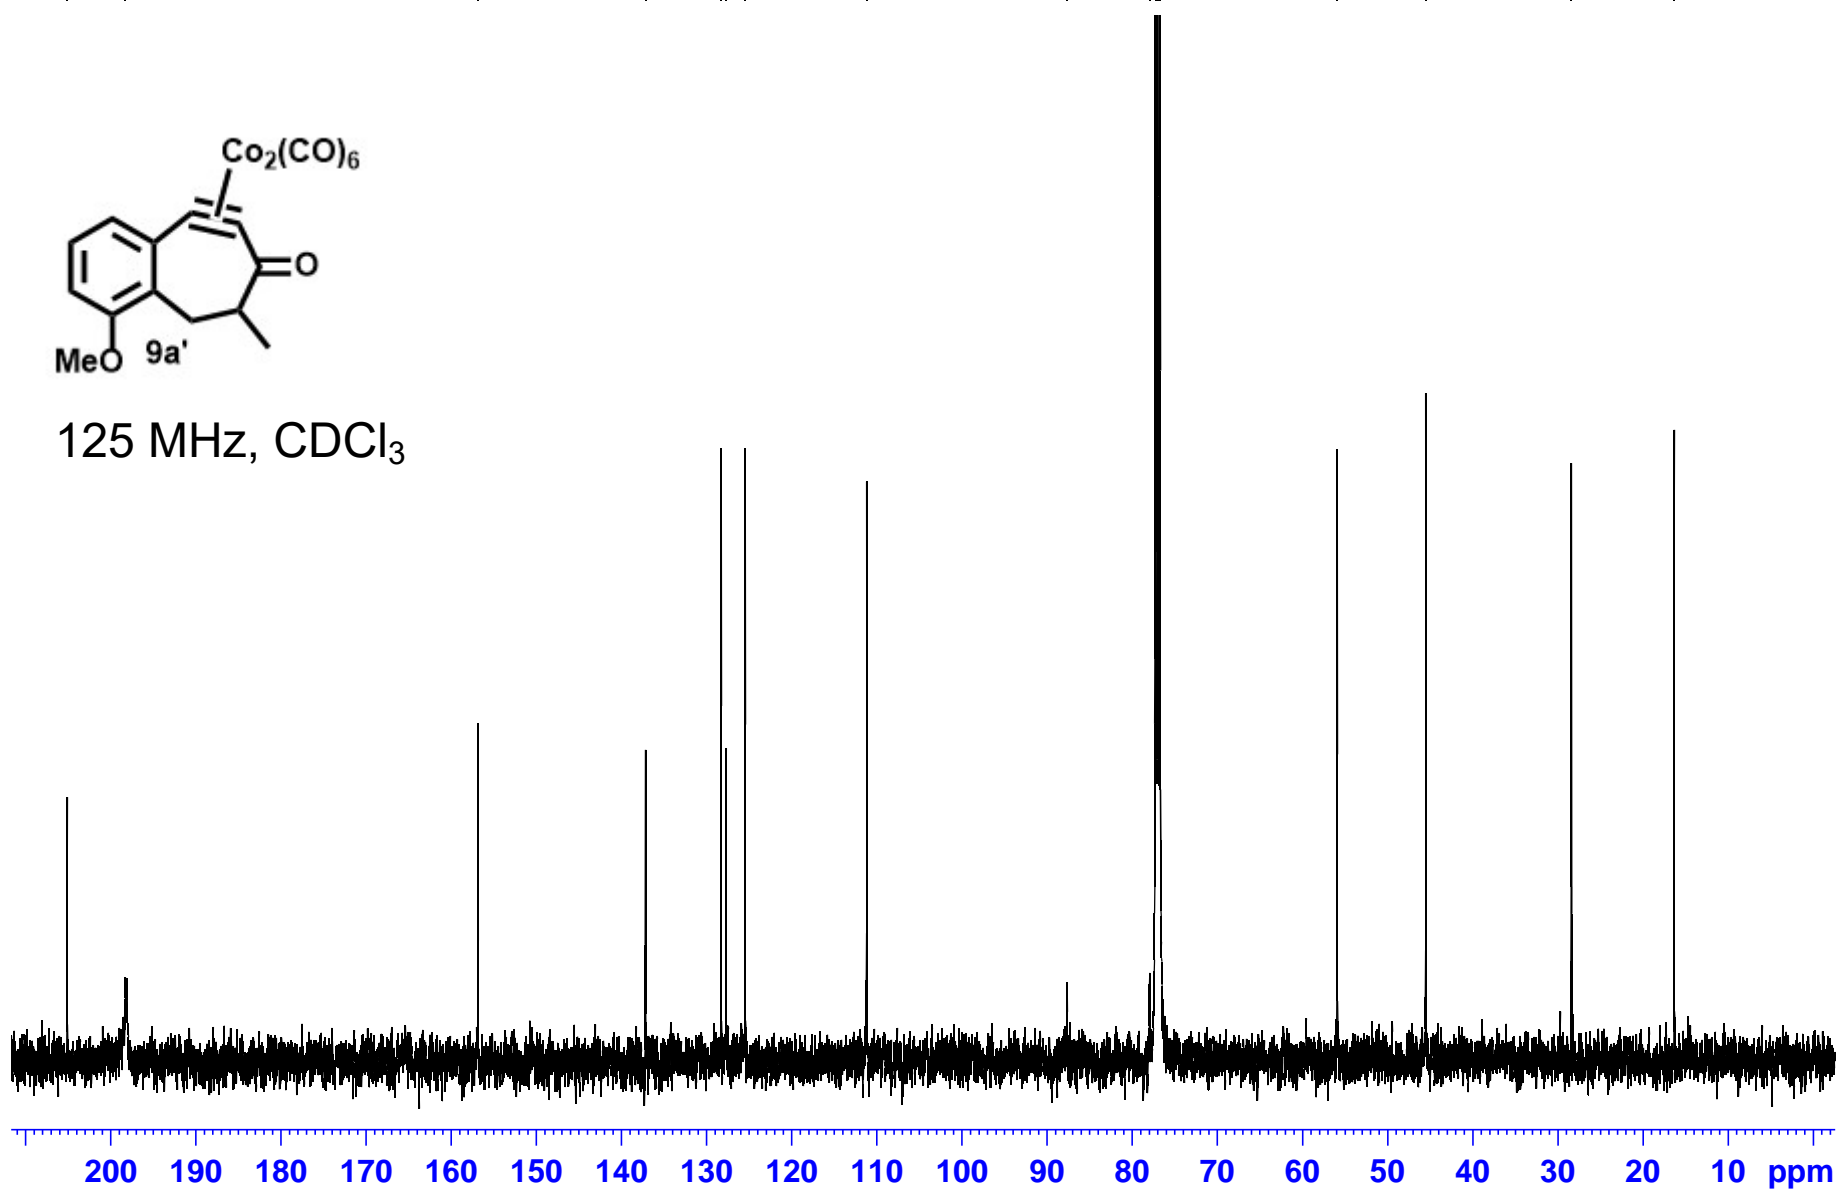

project3\_trimethoxy\_metha\_SnCl4\_cycli\_H1  
300US

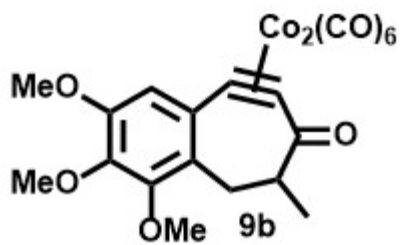

300 MHz, CDCl<sub>3</sub>

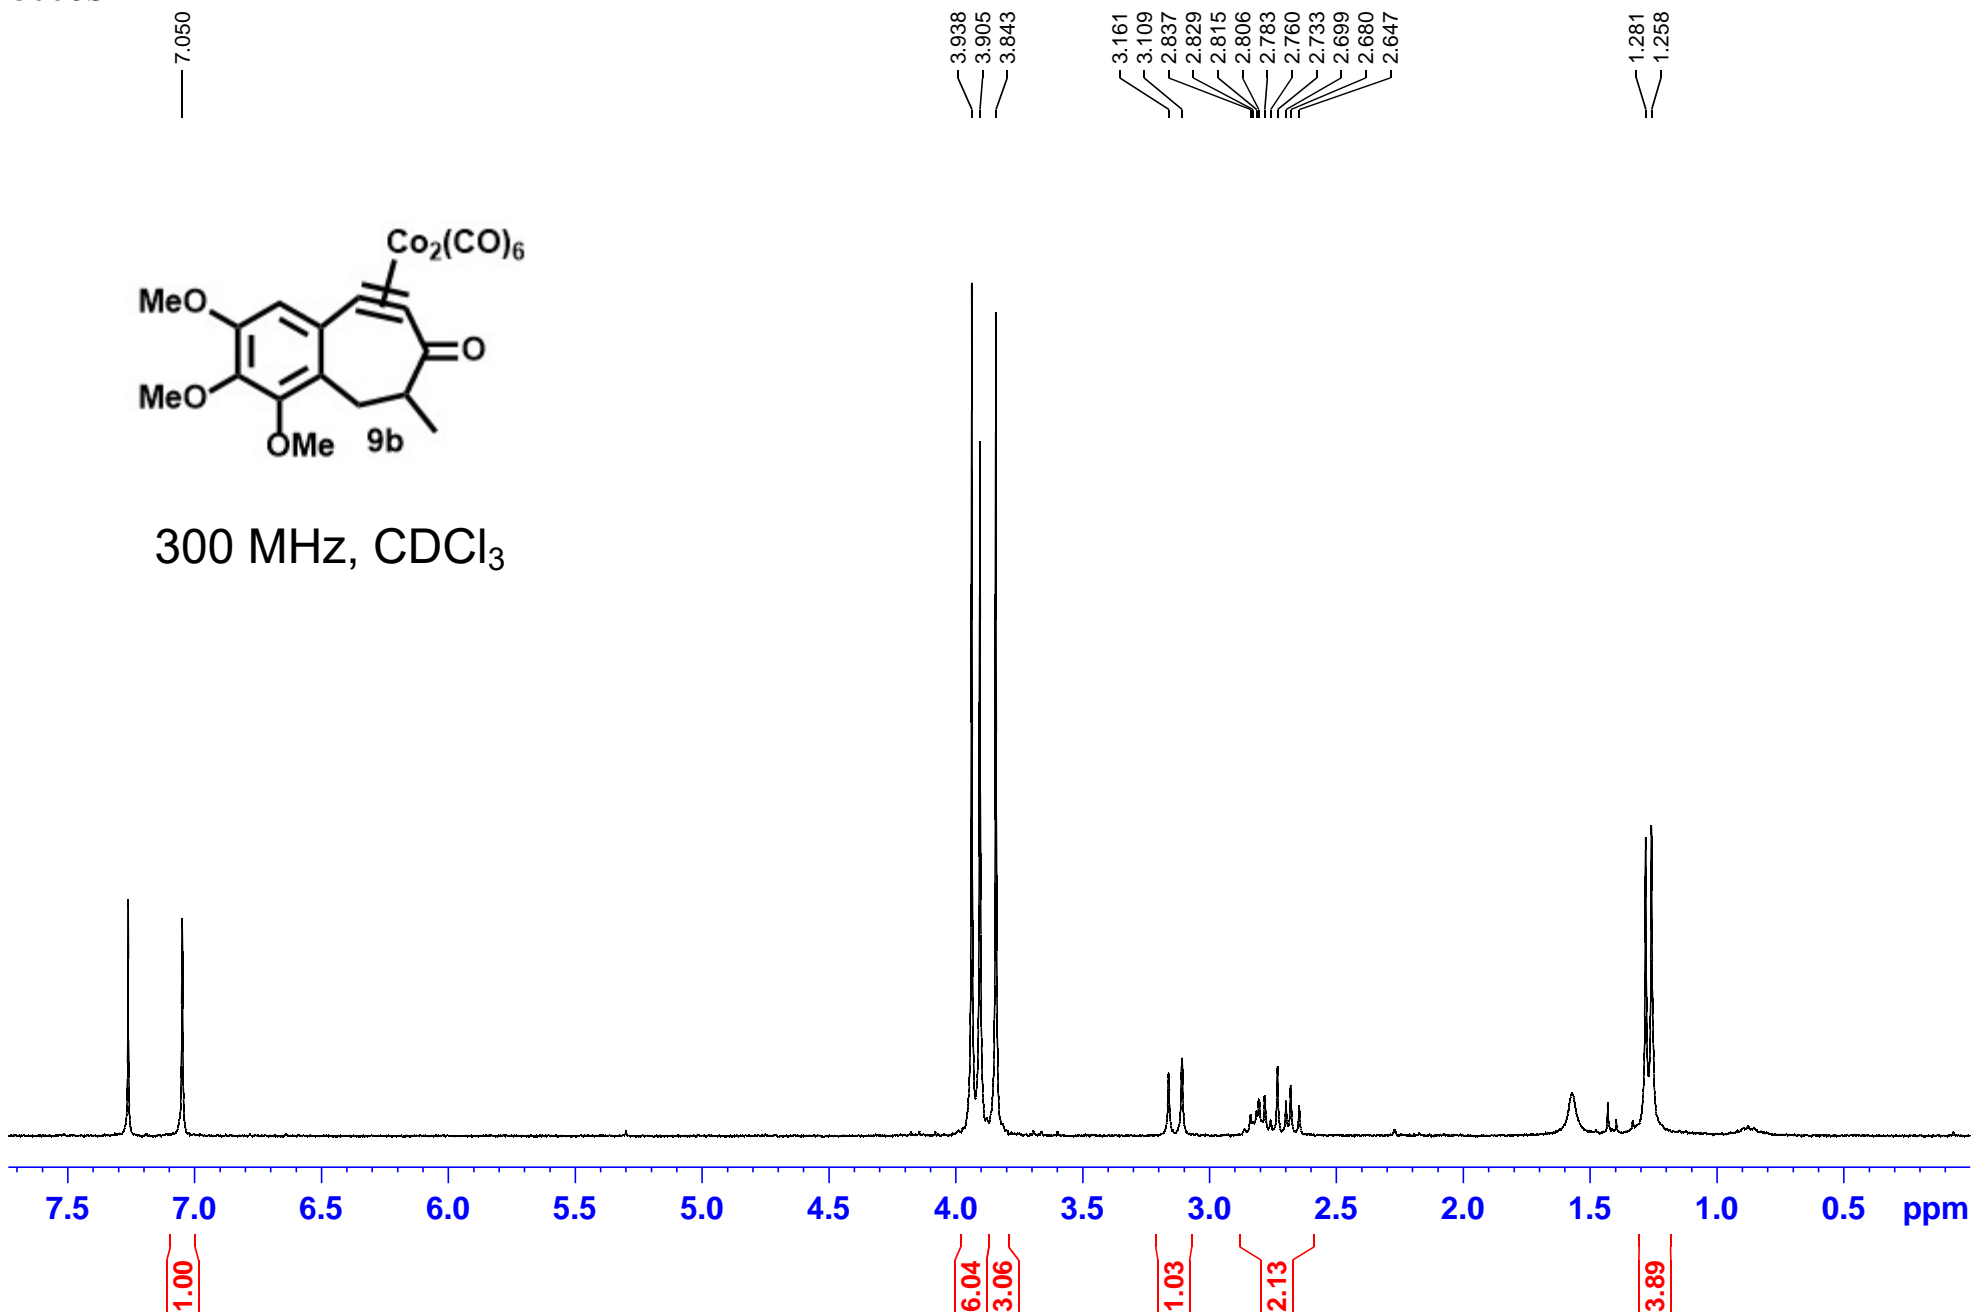



3MeO\_cc\_cobalt\_cycl\_metha\_c13

300US

204.962 198.369 153.037 151.562 143.399 131.377 126.083 111.873 88.002 78.153 61.518 60.989 56.037 45.769 29.153 16.496

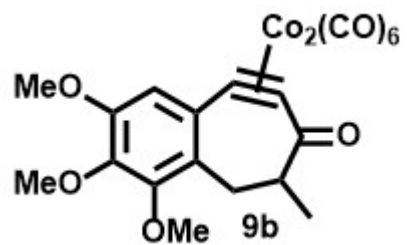

75 MHz, CDCl<sub>3</sub>

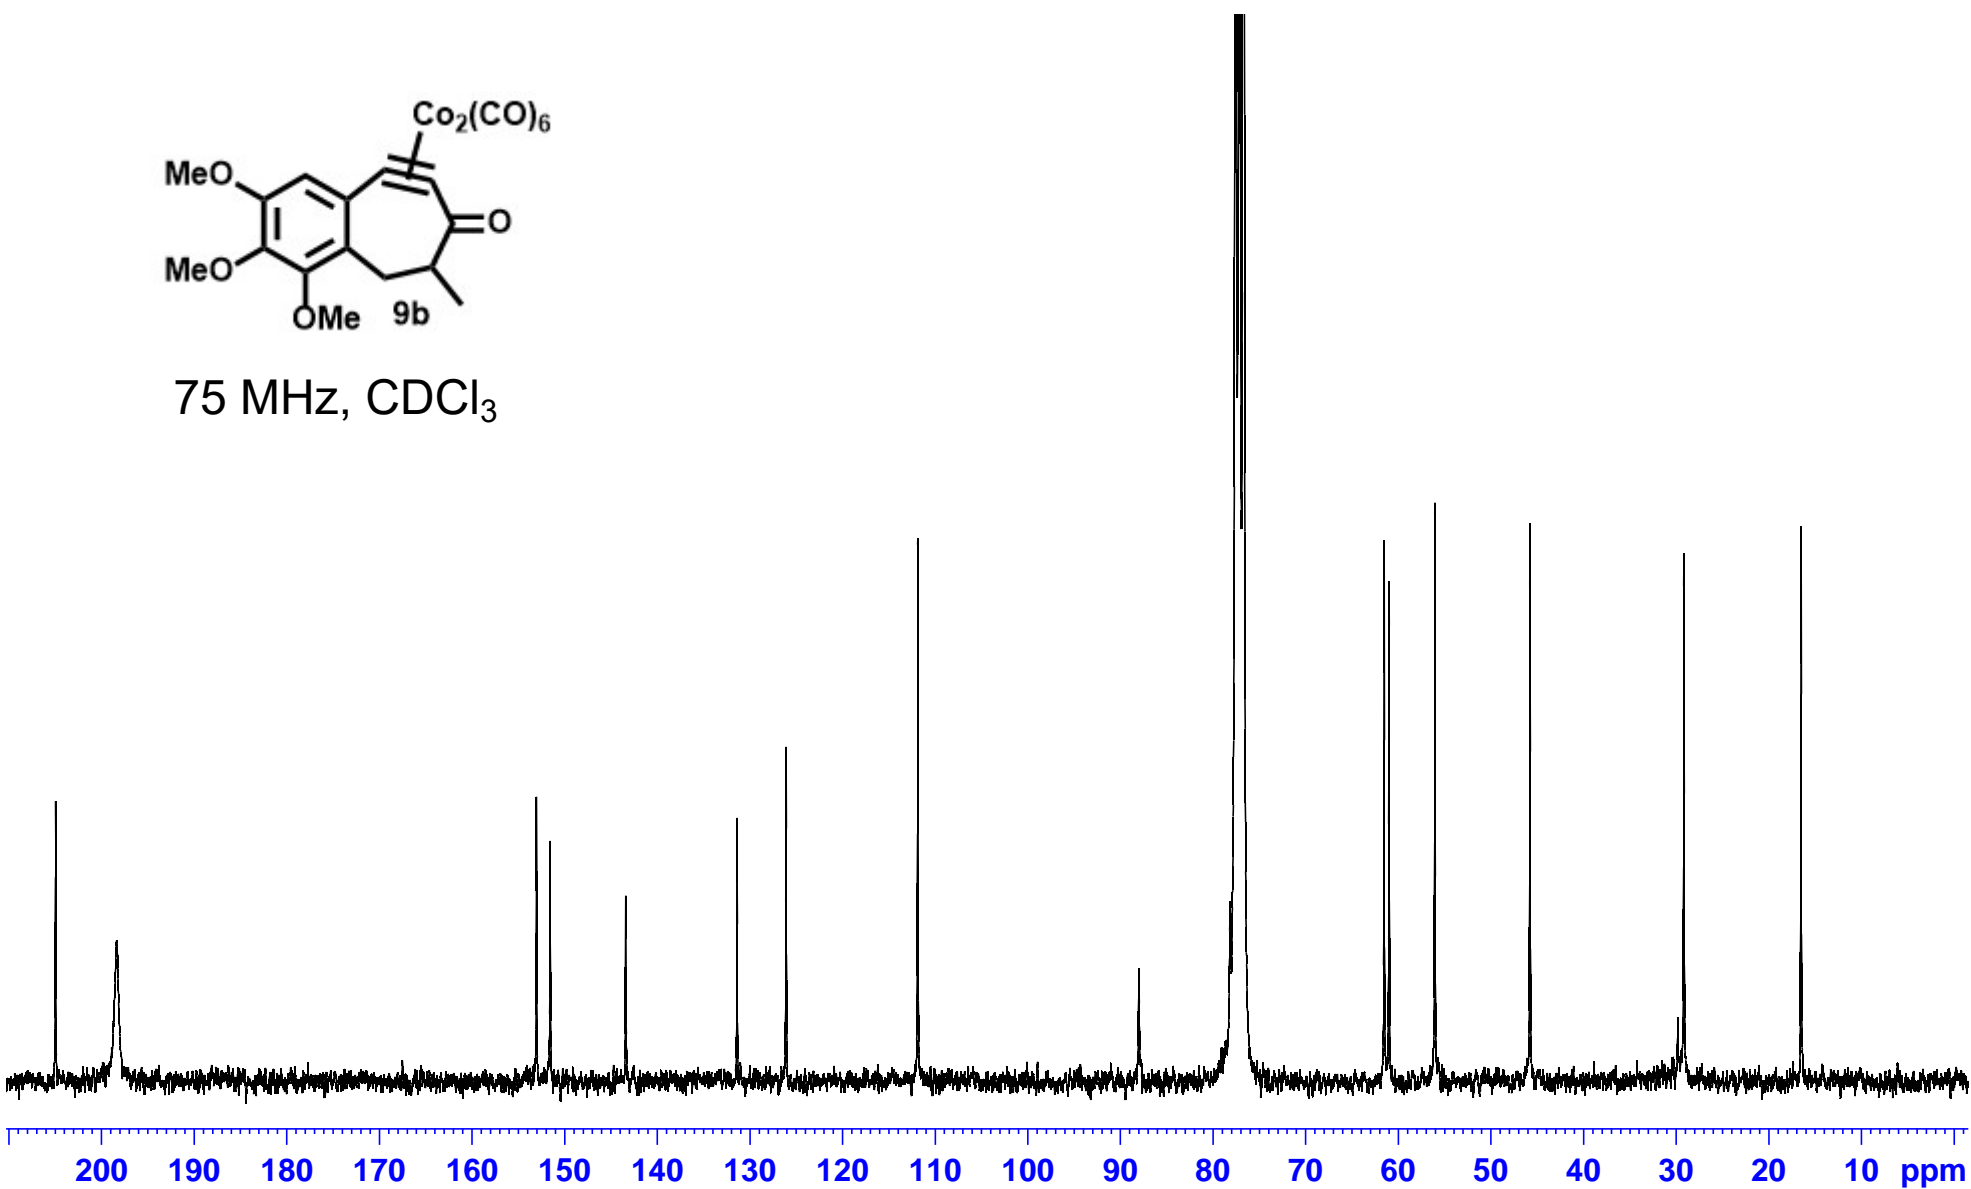

jrg.1099 2, main fr, 3,5-MeO<sub>2</sub>Ph-CC-CH(O)-C(Me)=CH<sub>2</sub>]-|Co<sub>2</sub> cyclizn

6.875  
6.517

3.866  
3.847

3.224  
3.192

2.815  
2.798  
2.783

2.668  
2.648  
2.636  
2.615

1.262  
1.248

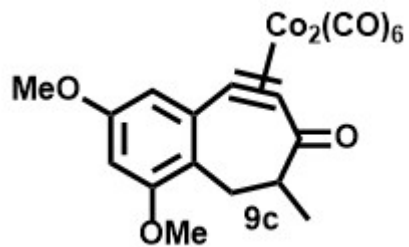

500 MHz, CDCl<sub>3</sub>

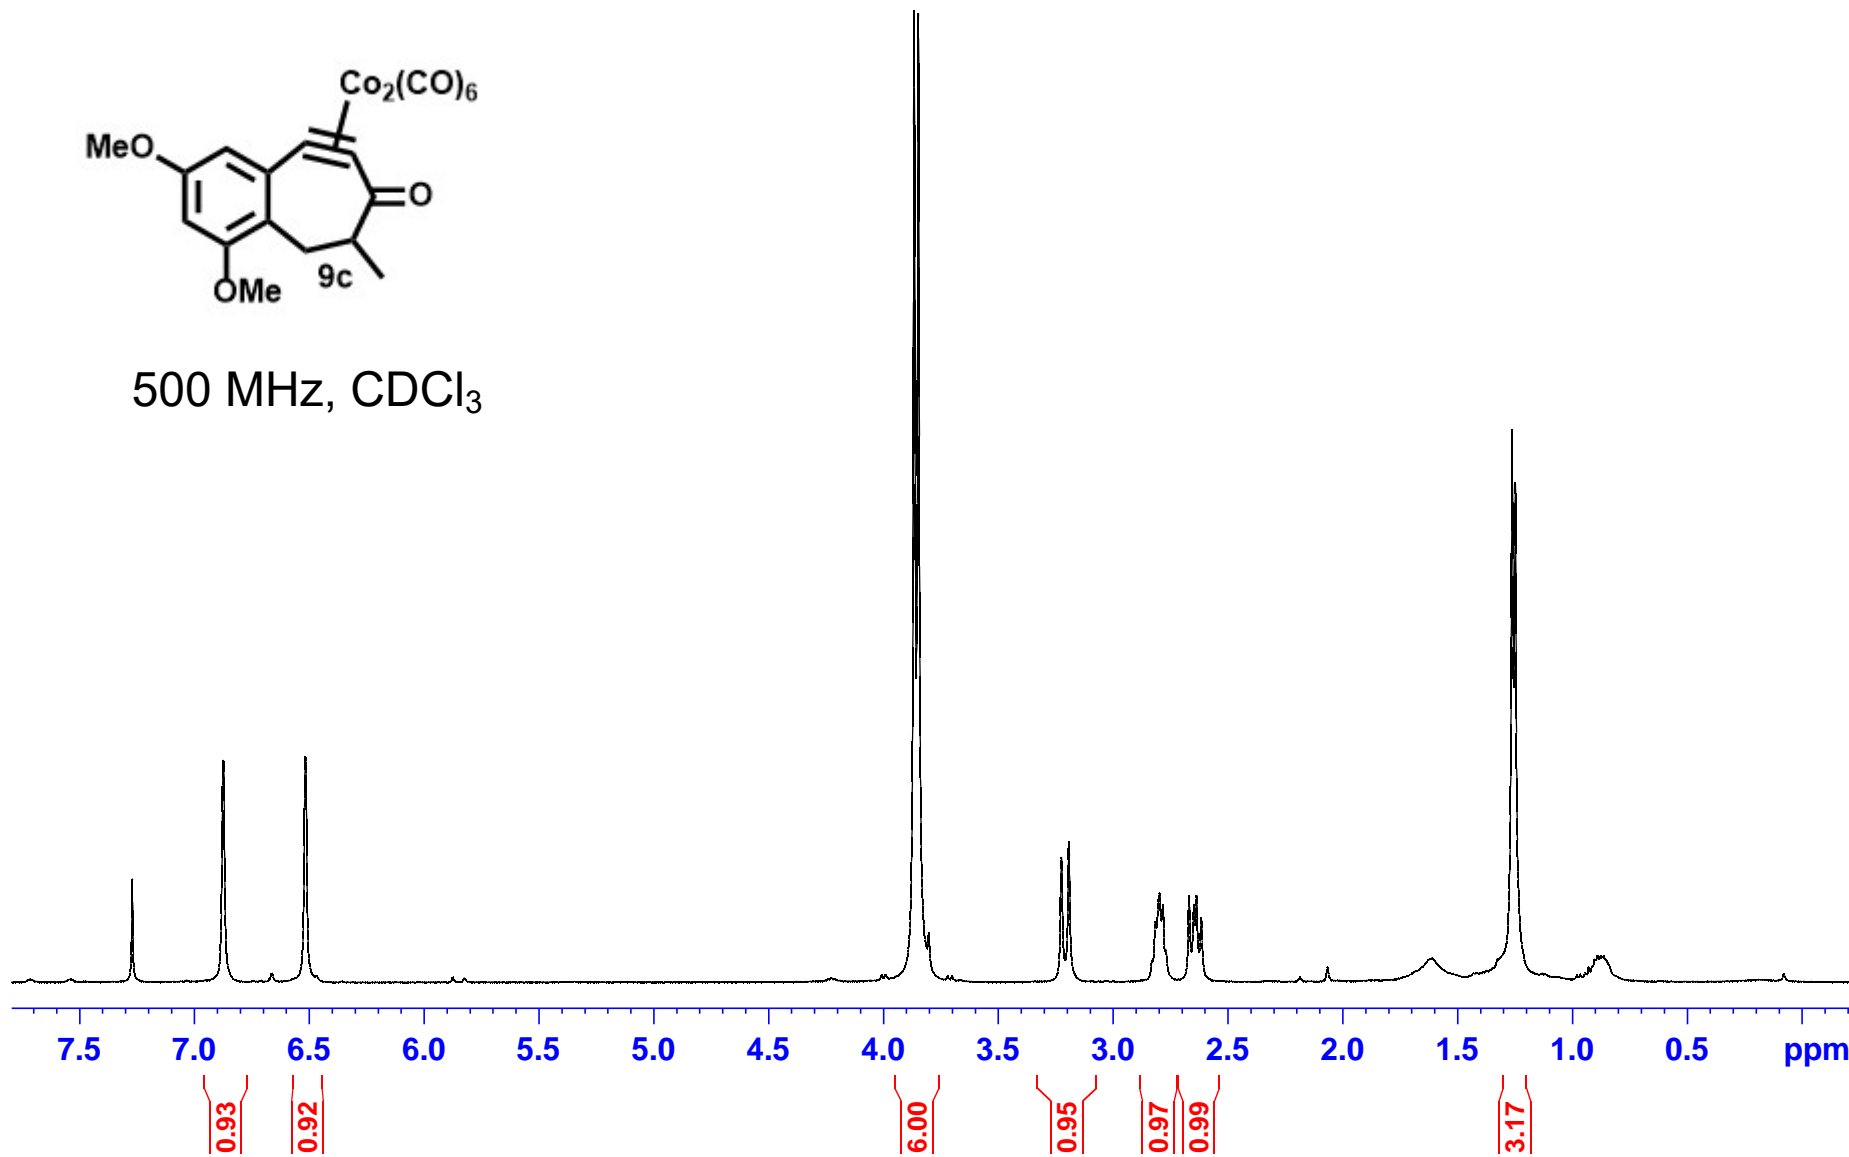

2MeO\_CC\_CYCL\_ME\_C13

300US

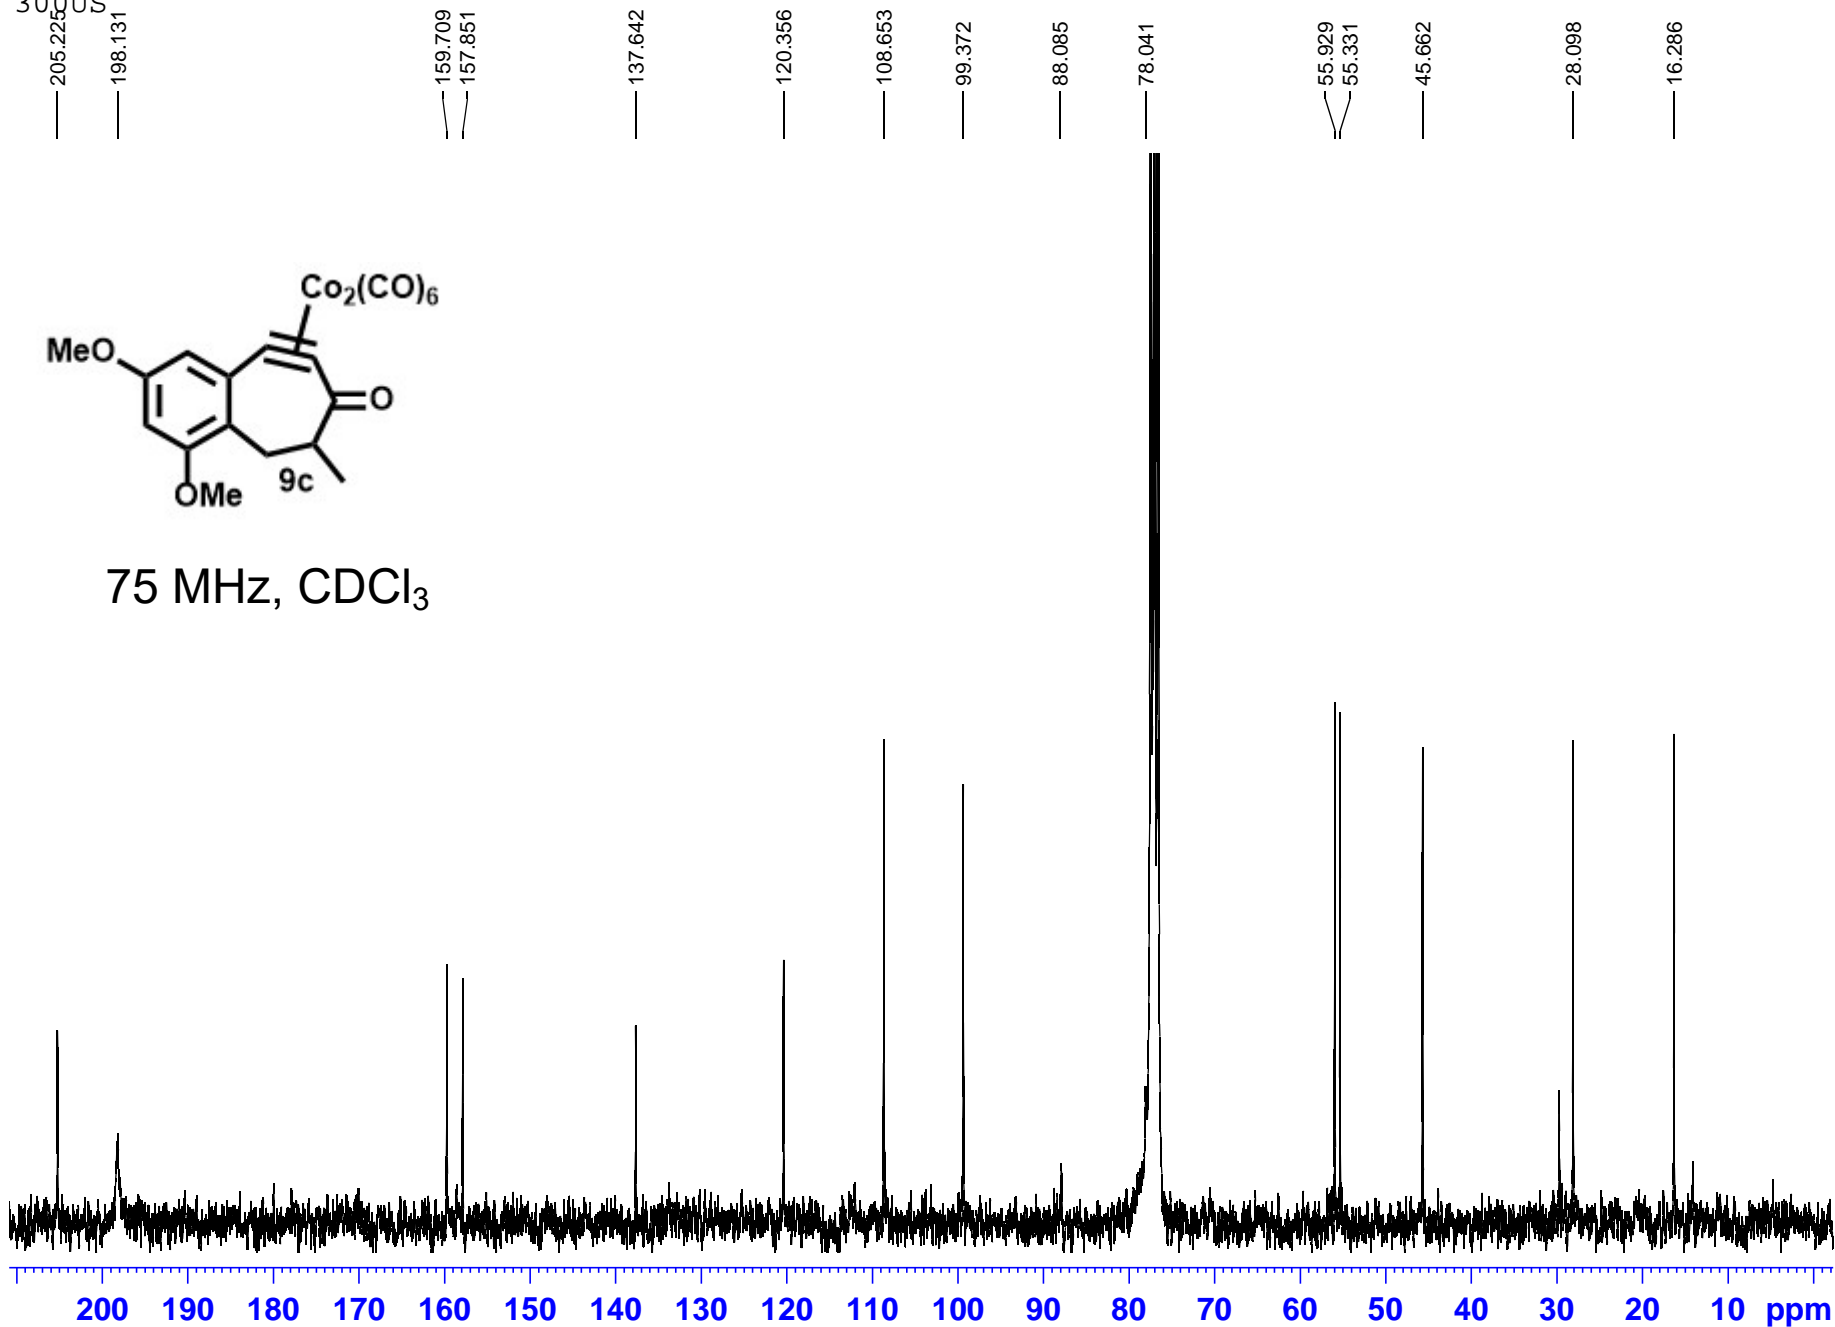

som.0704 1, indolyl cyclizn, 7/4/21

7.36  
7.34  
7.34  
7.33  
7.33  
7.31  
7.31  
7.27  
7.18  
7.18  
7.17  
7.16  
7.16  
7.15  
7.15

3.94

3.18  
3.17  
3.15  
3.14  
3.05  
3.04  
3.04  
2.83  
2.81  
2.80  
2.78

1.40  
1.38

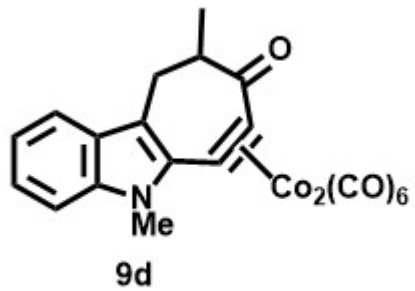

500 MHz, CDCl<sub>3</sub>

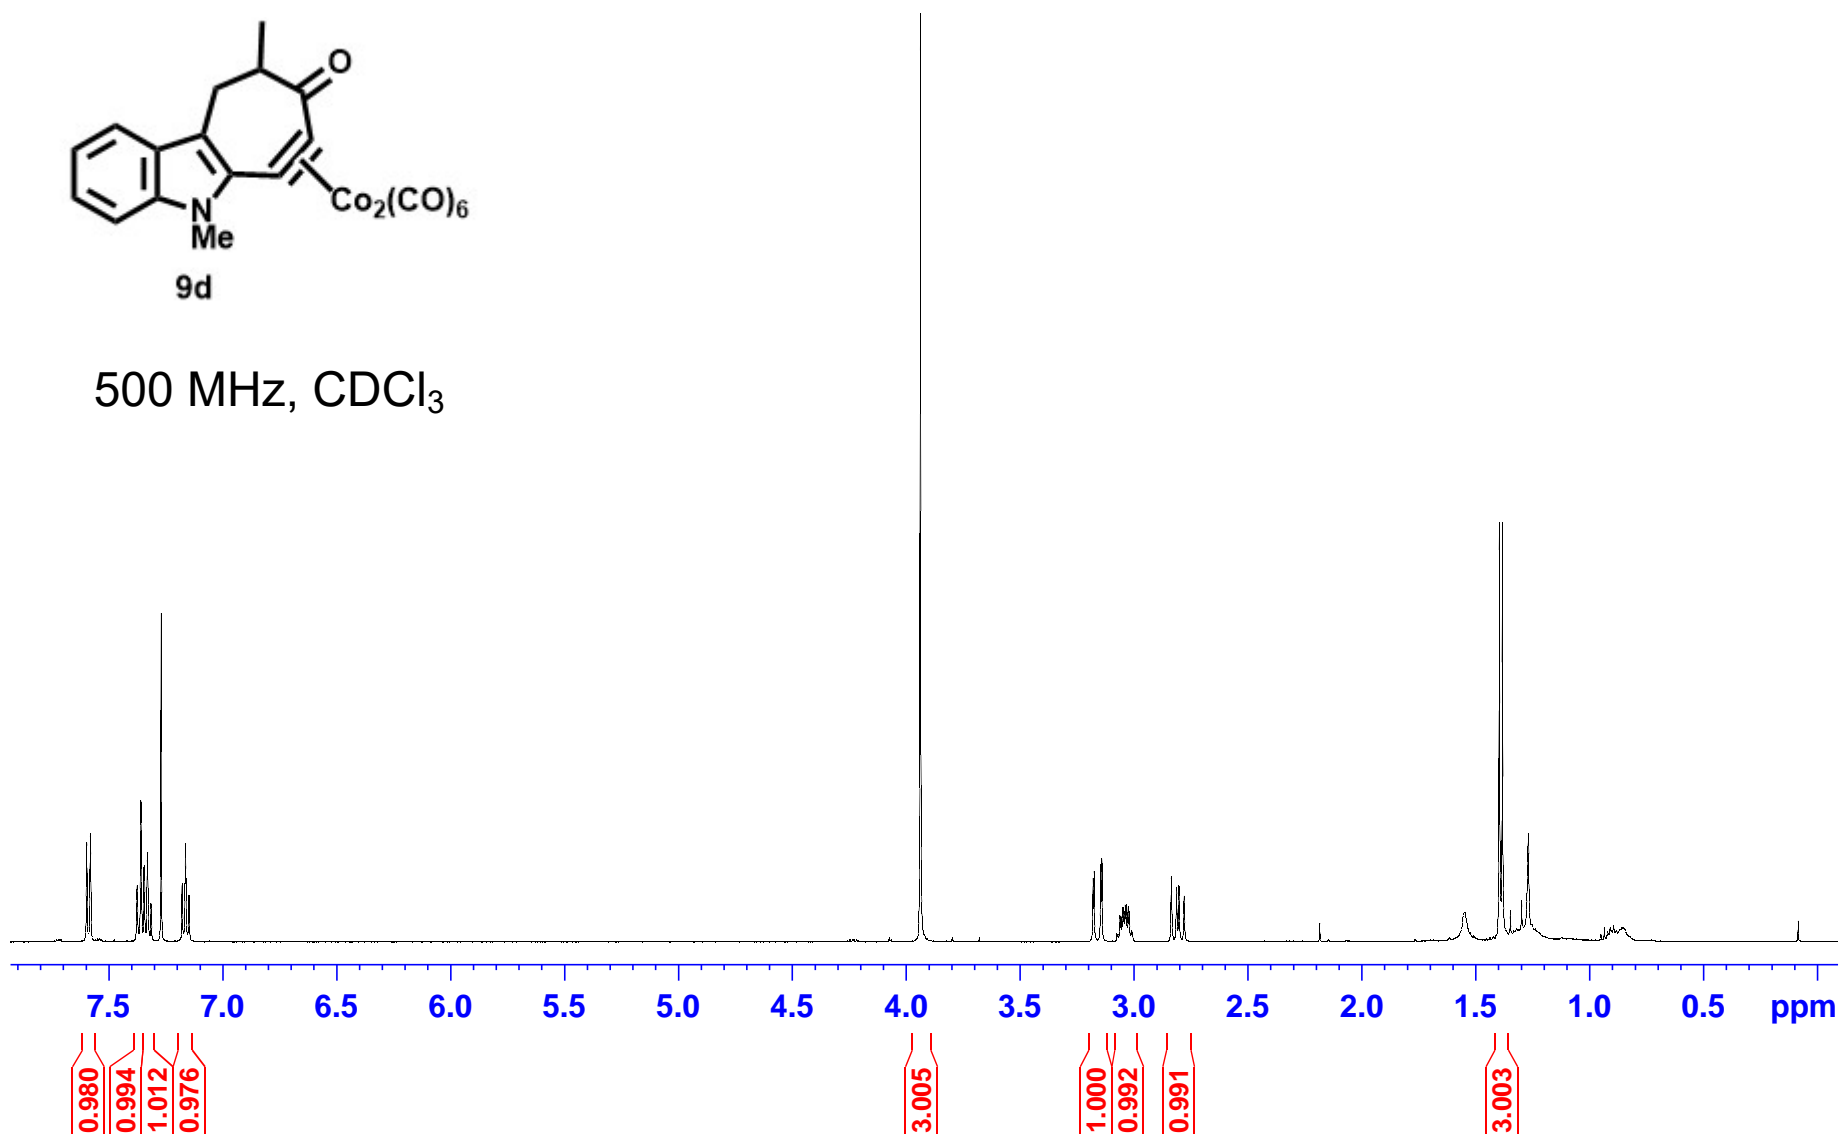

som.0704 2, 13C indolyl cyclizn, 7/4/21

— 204.80  
— 197.99

— 138.79  
— 132.55  
— 126.63  
— 123.60  
— 120.14  
— 119.21  
— 115.25  
— 109.45

— 86.45

— 72.37

— 43.85

— 29.92  
— 29.46

— 16.43

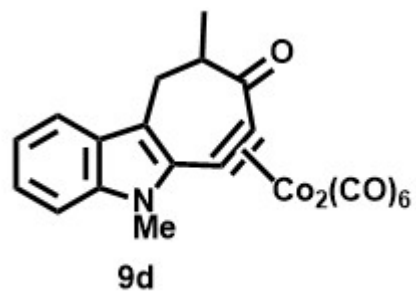

125 MHz, CDCl<sub>3</sub>

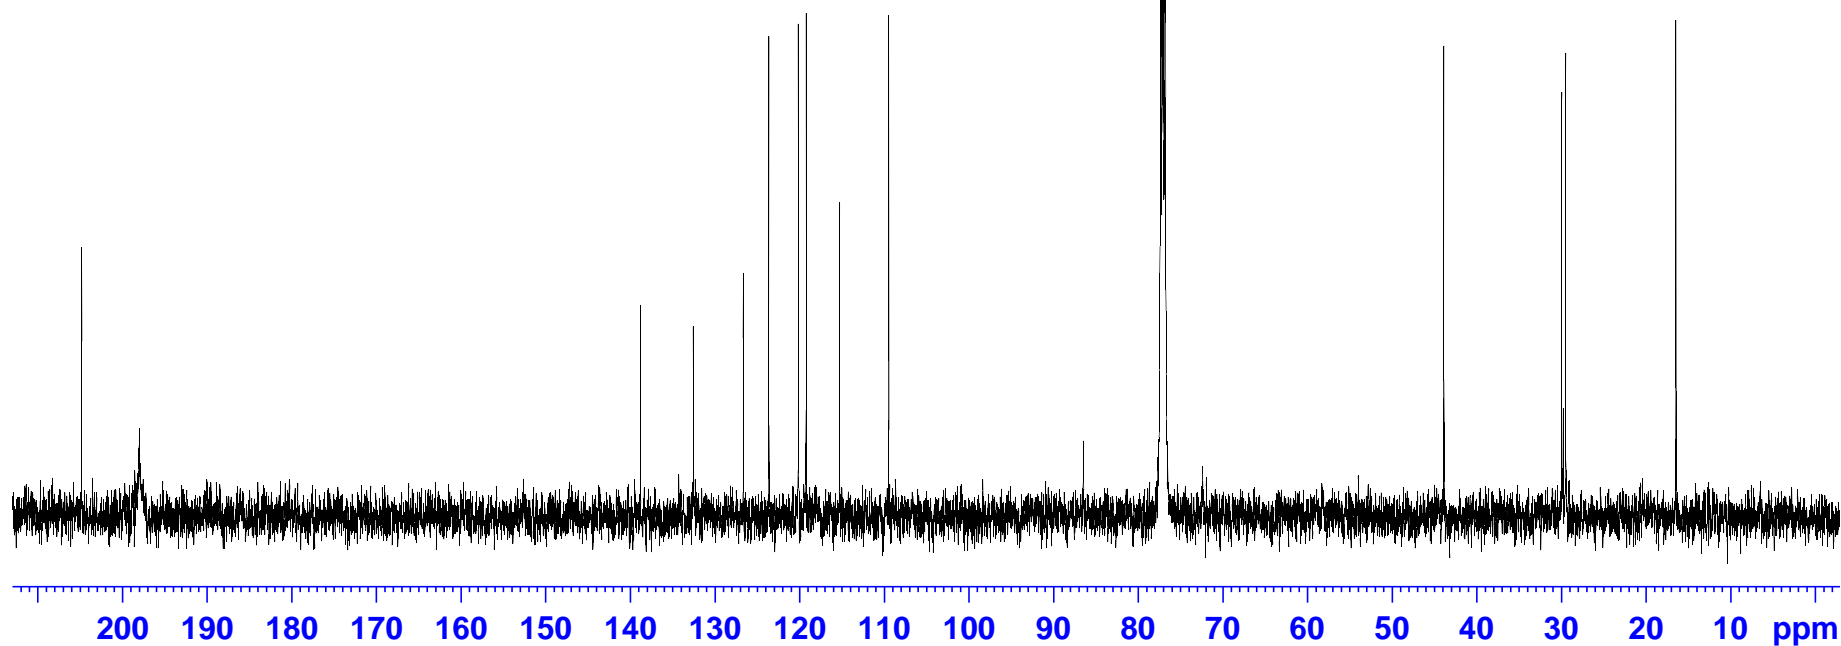

dimethoxy\_cc\_cobalt\_cyclization\_ethyl\_H1  
300US

7.27  
6.87  
6.86  
6.53  
6.52

3.87  
3.85

3.06  
3.06  
3.01  
3.00  
2.97  
2.94  
2.65  
2.65  
2.63  
2.62

1.77  
1.74  
1.72  
1.70  
1.47  
1.44  
1.42  
1.40  
0.99  
0.97  
0.94

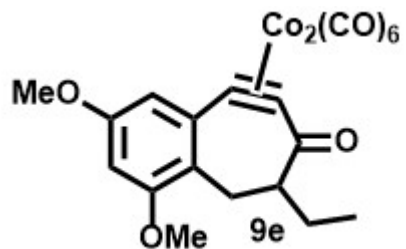

300 MHz, CDCl<sub>3</sub>

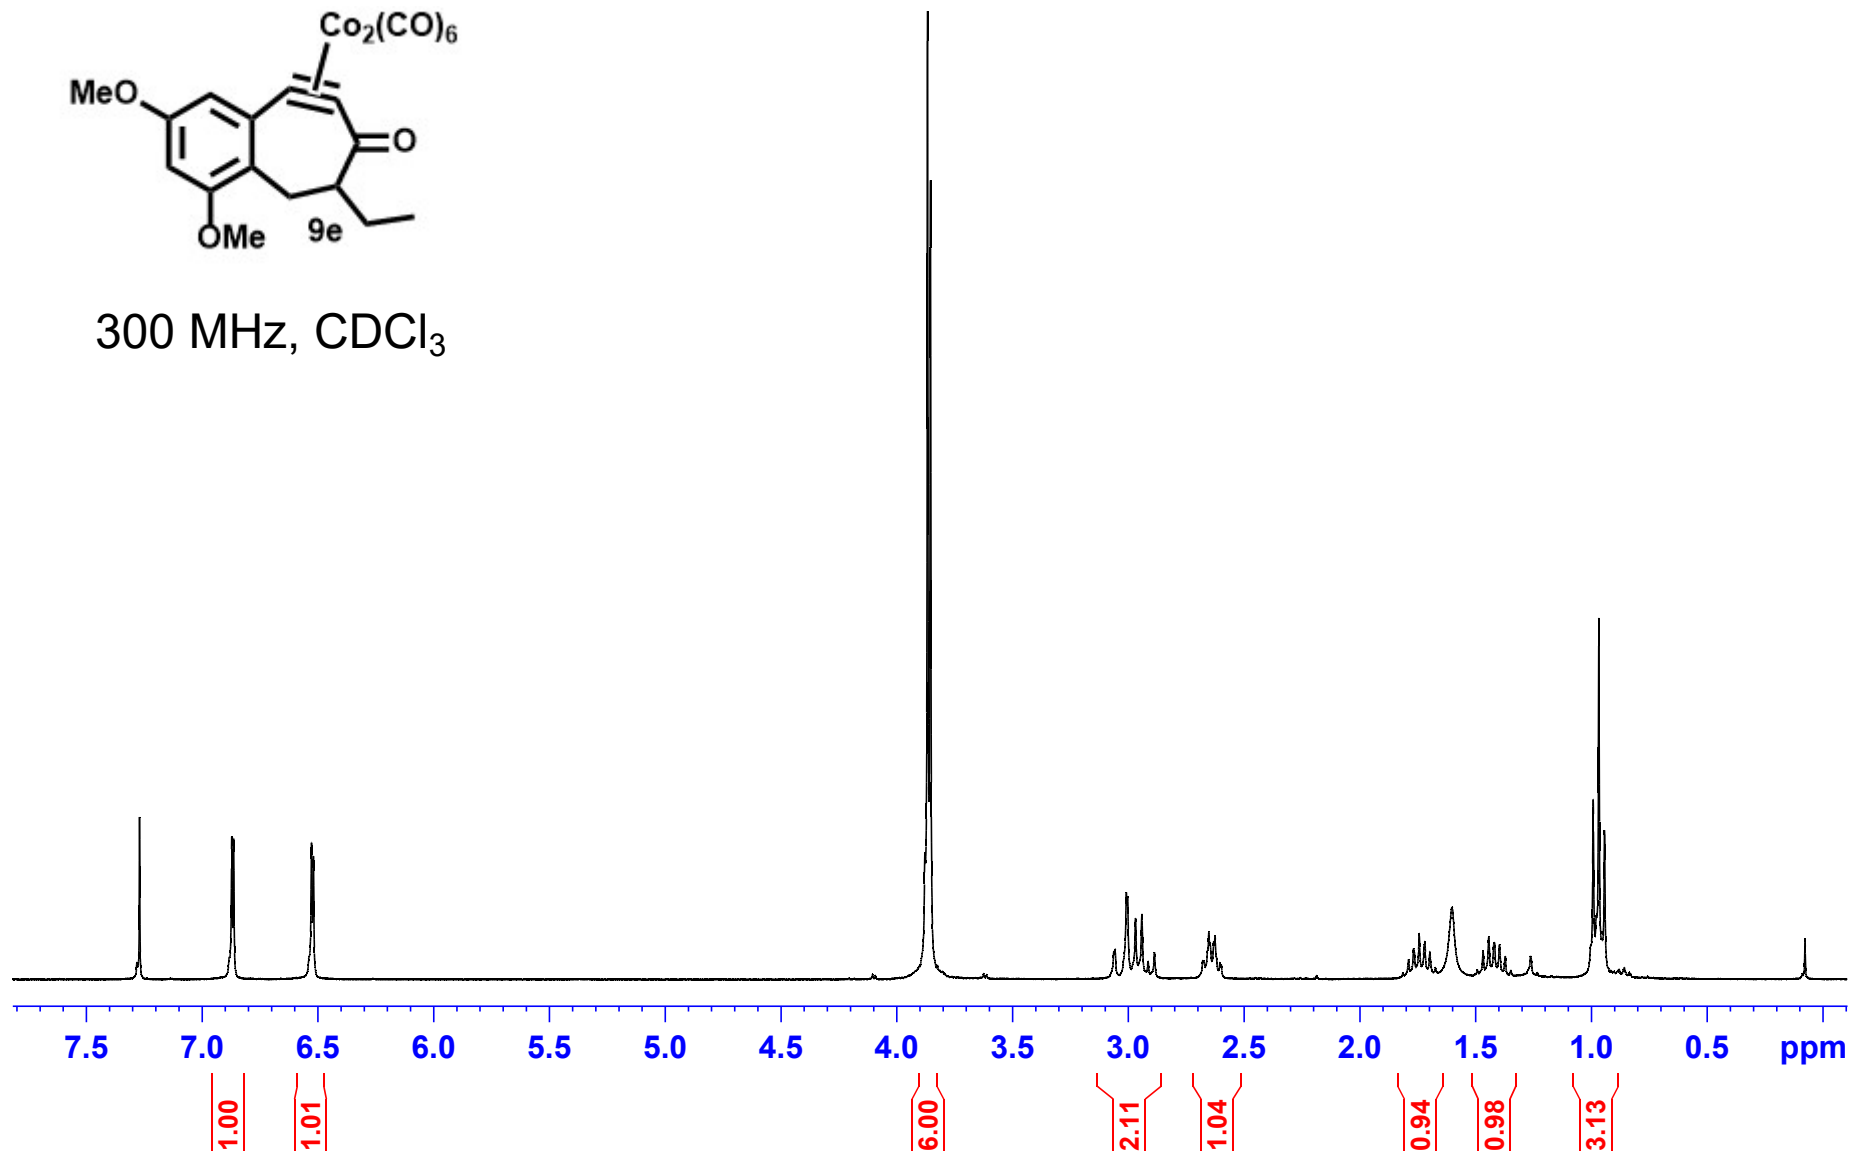

dimethoxy\_cc\_cobalt\_cyclization\_ethyl\_C13\_overnight

300US

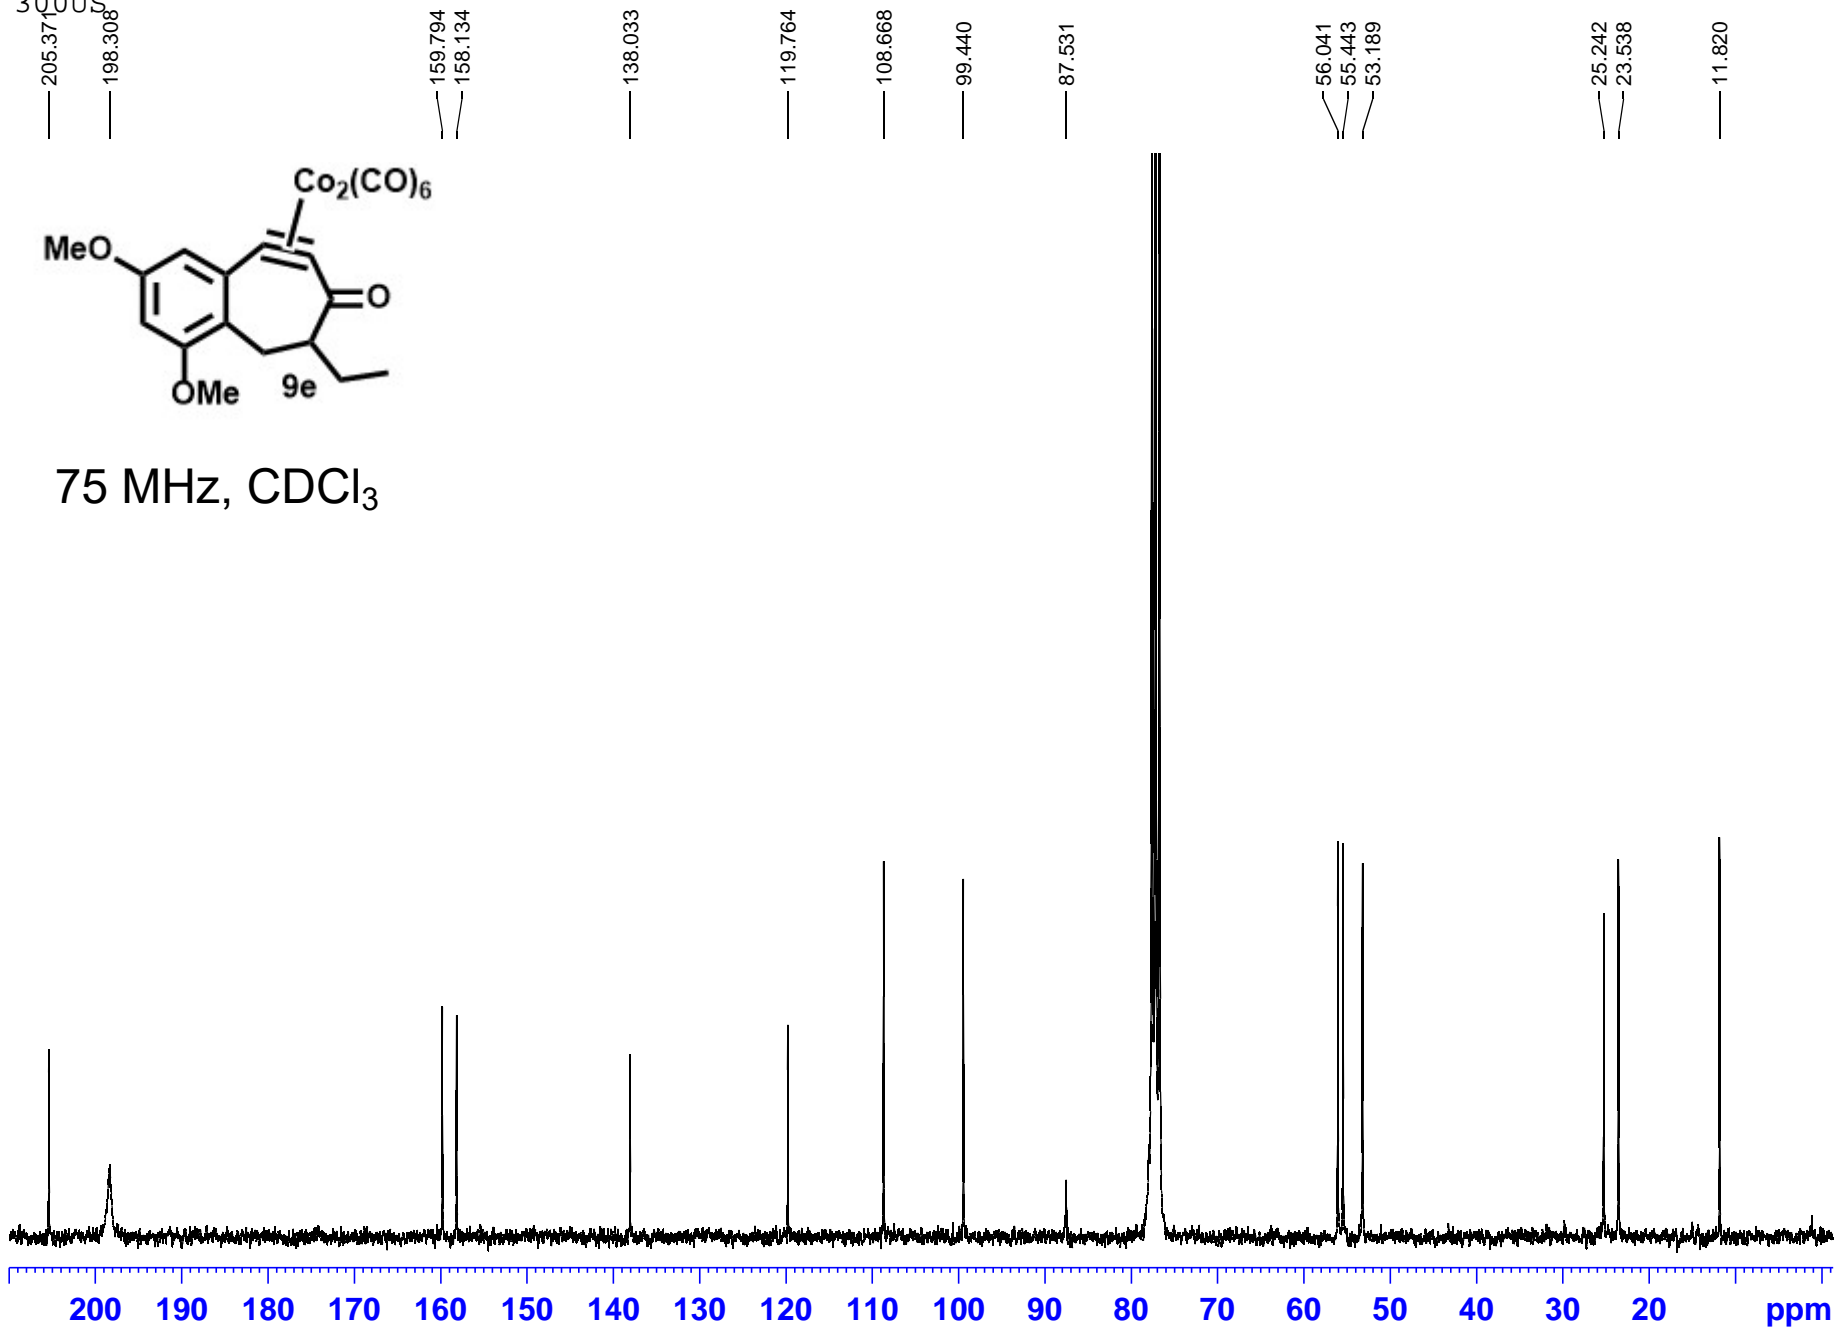

75 MHz, CDCl<sub>3</sub>

som.09e 1, cycliz prod, benzyl, 8/4/21

7.28  
7.27  
7.26  
7.23  
7.22  
7.20  
7.17  
7.14  
6.87  
6.86  
6.44  
6.43

3.85  
3.59  
3.29  
3.24  
3.00  
2.99  
2.70  
2.67  
2.66  
2.63  
2.60  
2.57  
2.54

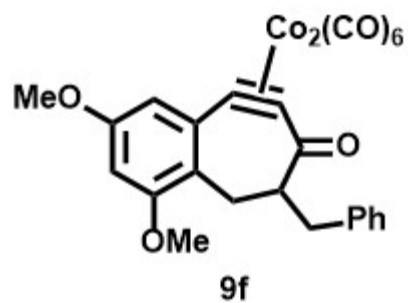

300 MHz, CDCl<sub>3</sub>

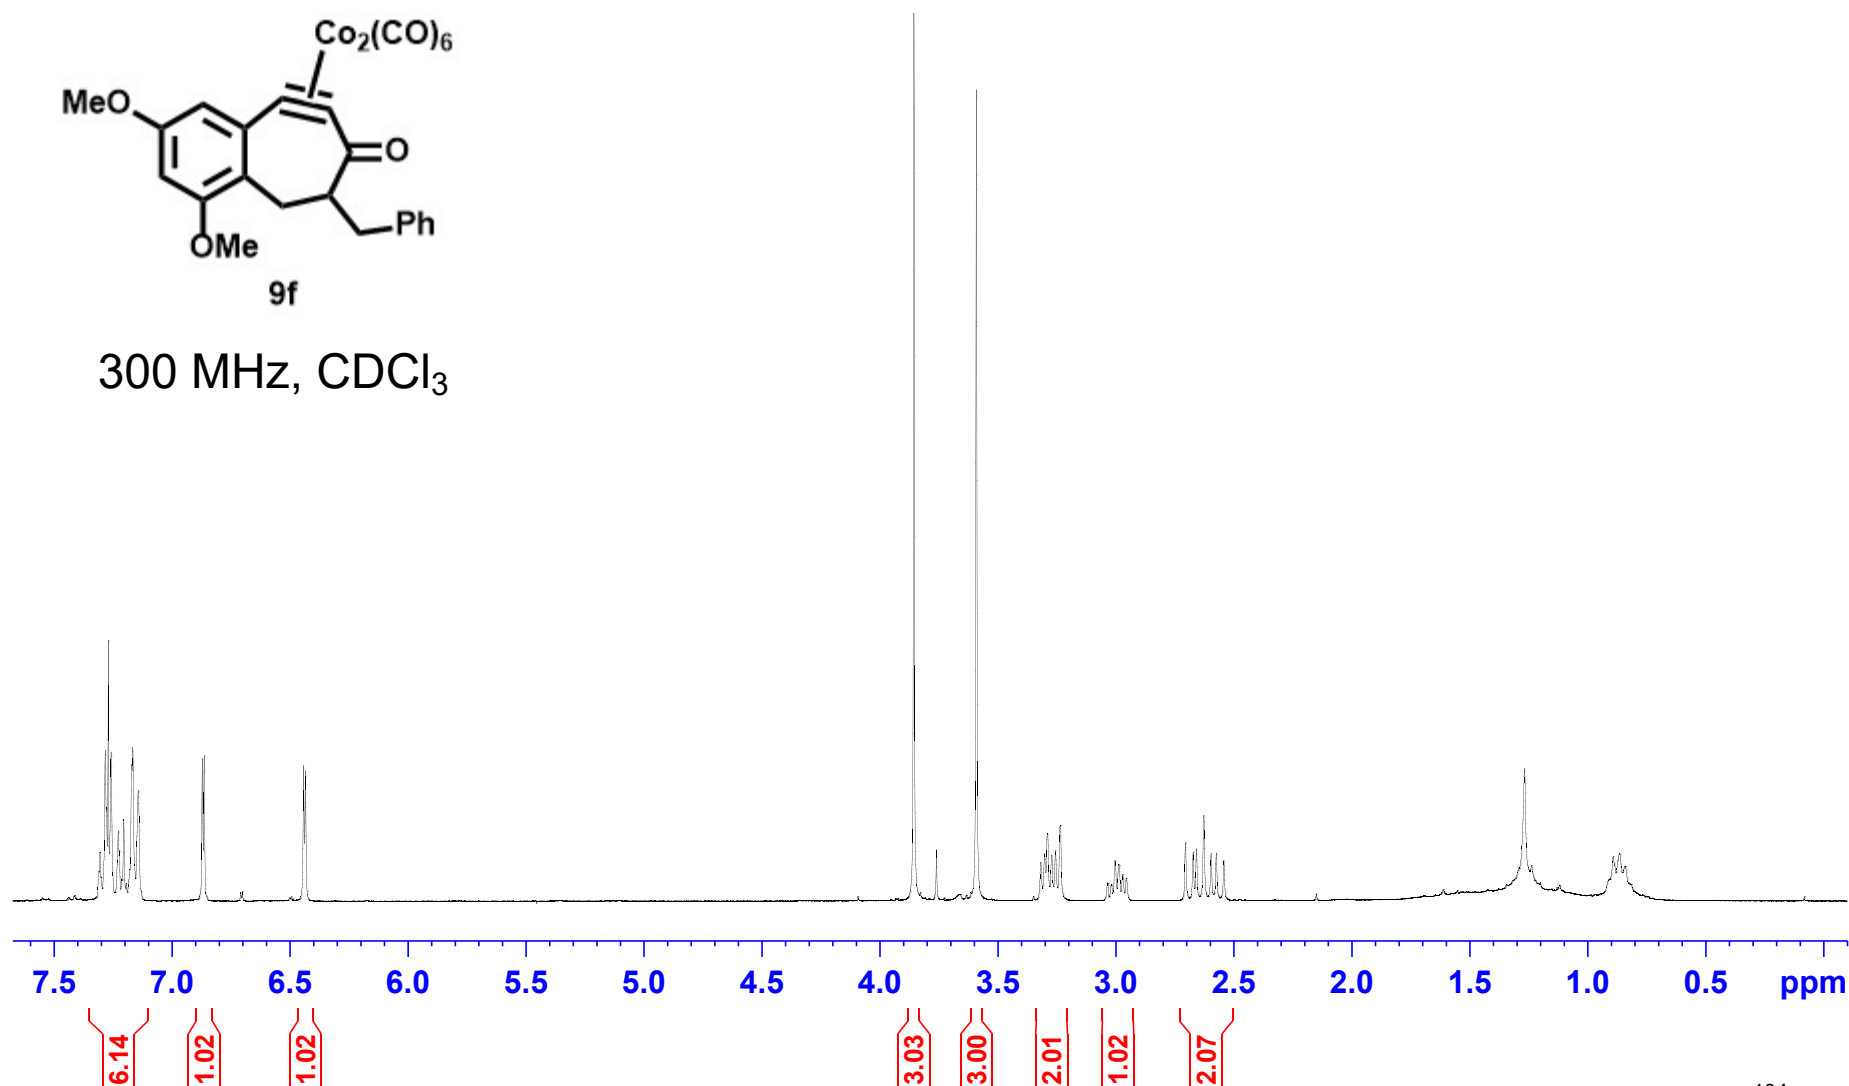



2MeO\_Bn\_cycl\_c13

300US

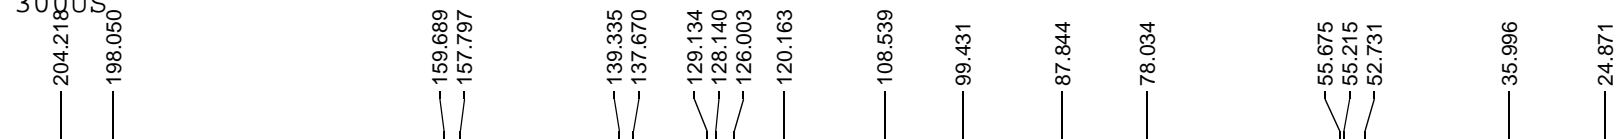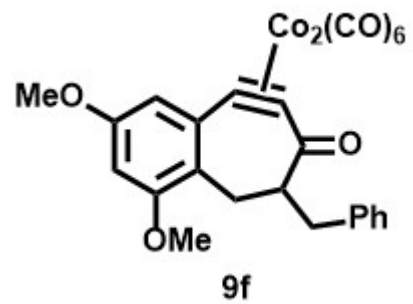

75 MHz, CDCl<sub>3</sub>

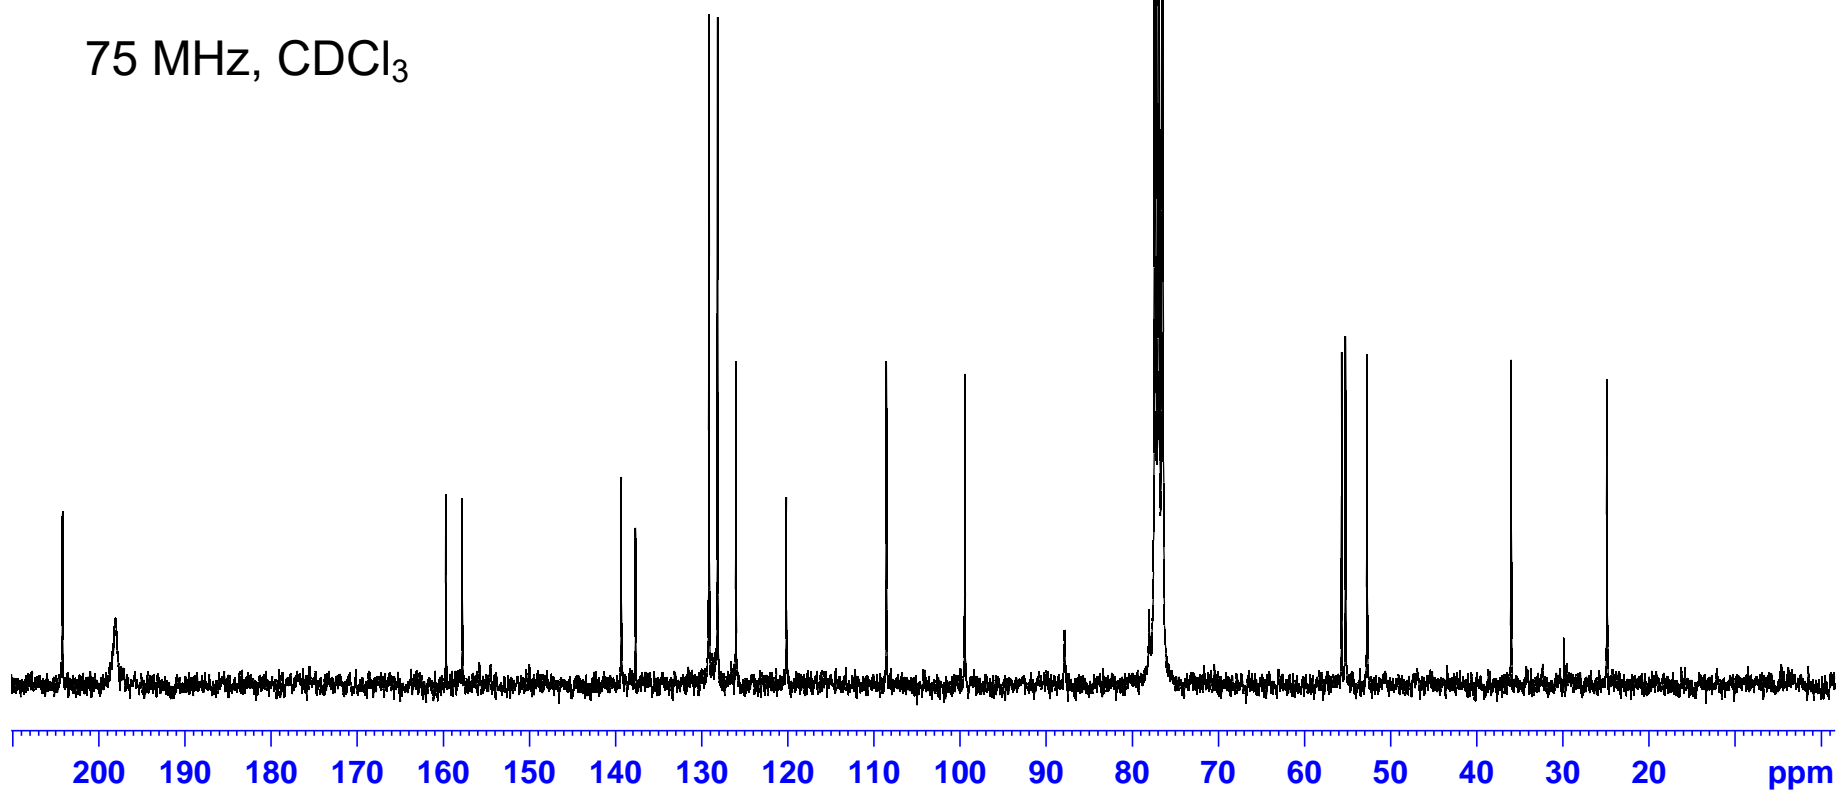

som.09f 1 1H, cyclized, di(OMe)-isopropyl, 9/5/21

7.270  
6.865  
6.860  
6.535  
6.530

3.868  
3.863

3.206  
3.191  
3.174  
3.158

2.846  
2.813

2.498  
2.482  
2.466

1.818  
1.805  
1.790  
1.776

0.944  
0.931  
0.923  
0.910

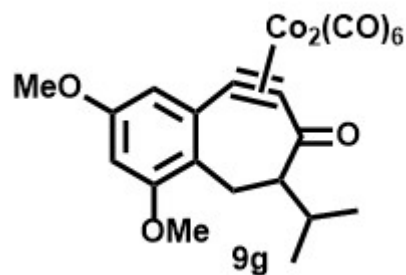

500 MHz, CDCl<sub>3</sub>

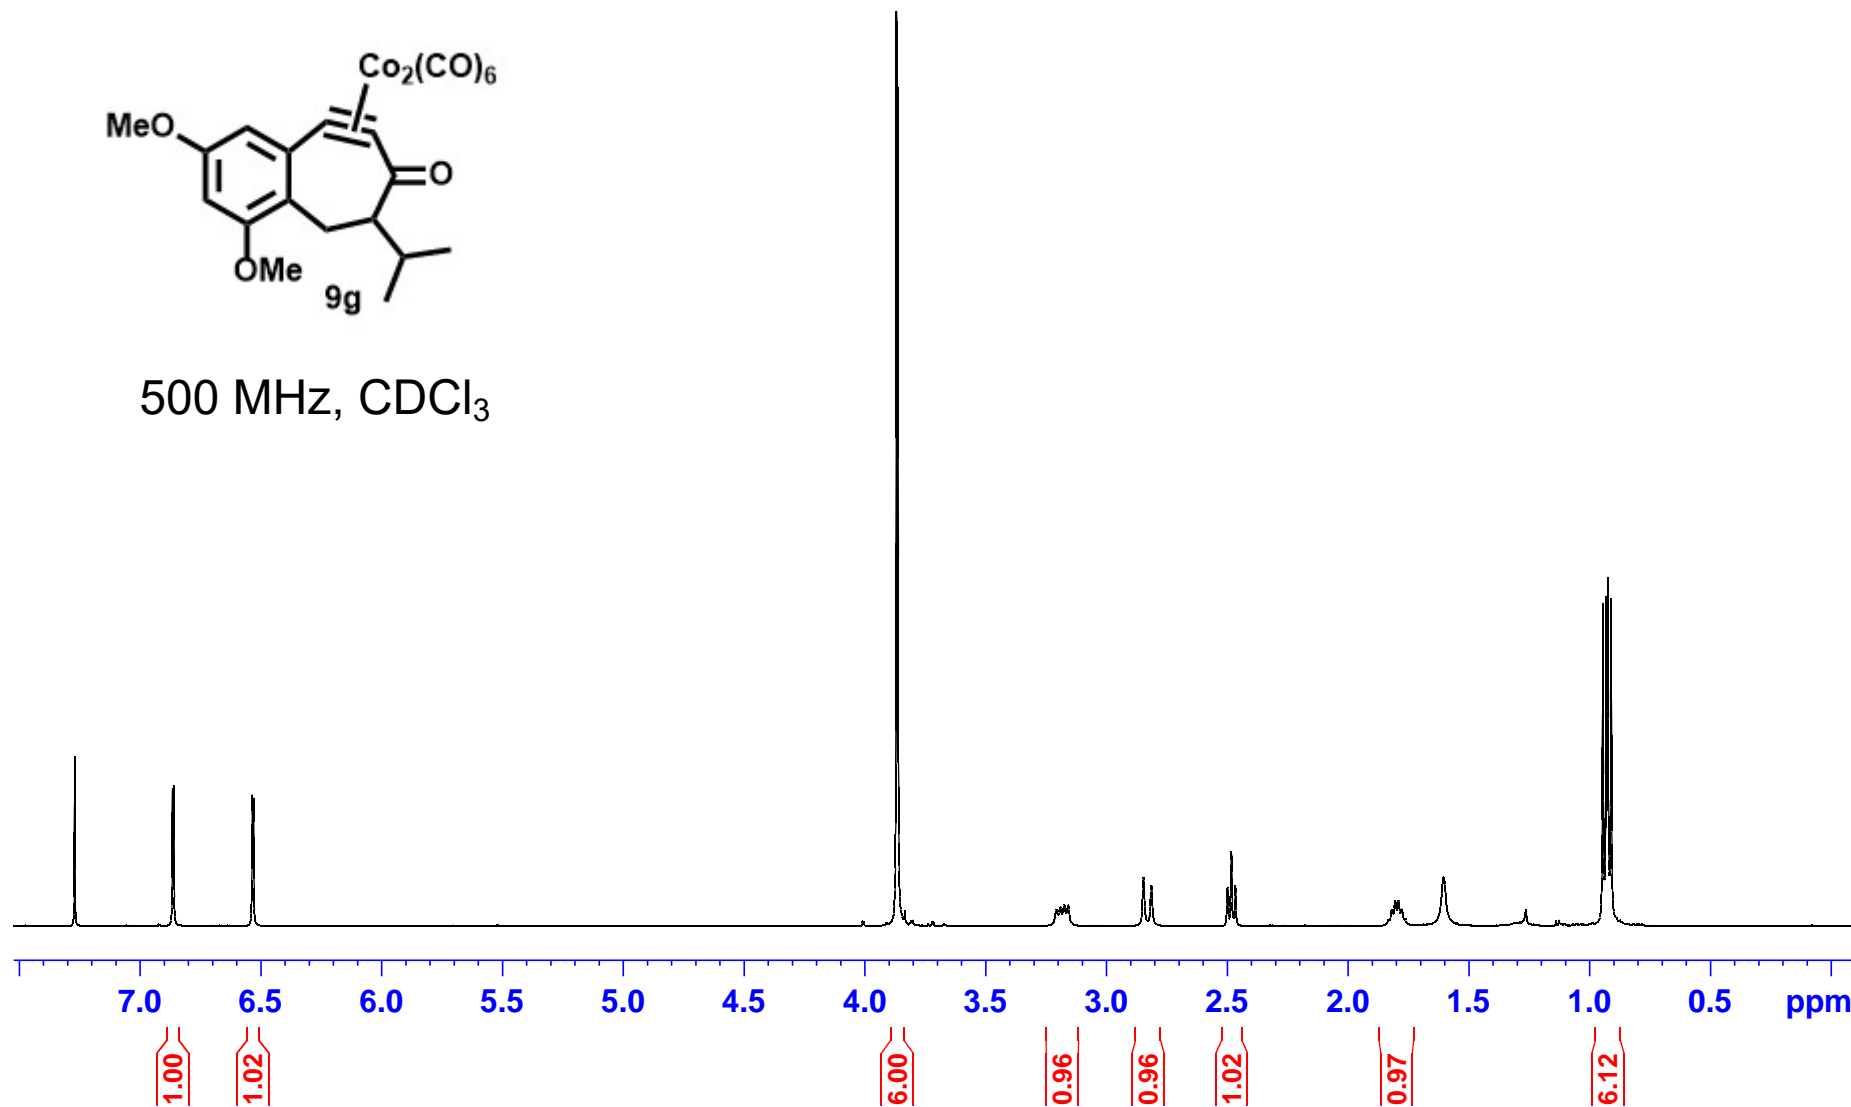

som.09f 2 13C, (MeO)2-isopropyl cyclizn, 9/5/21

204.936  
198.306  
159.723  
158.062  
138.128  
119.227  
108.584  
99.413  
86.974  
77.685  
77.250  
76.996  
76.742  
58.749  
55.912  
55.300  
27.478  
22.838  
20.797  
19.624

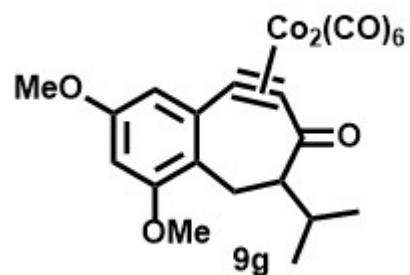

125 MHz, CDCl<sub>3</sub>

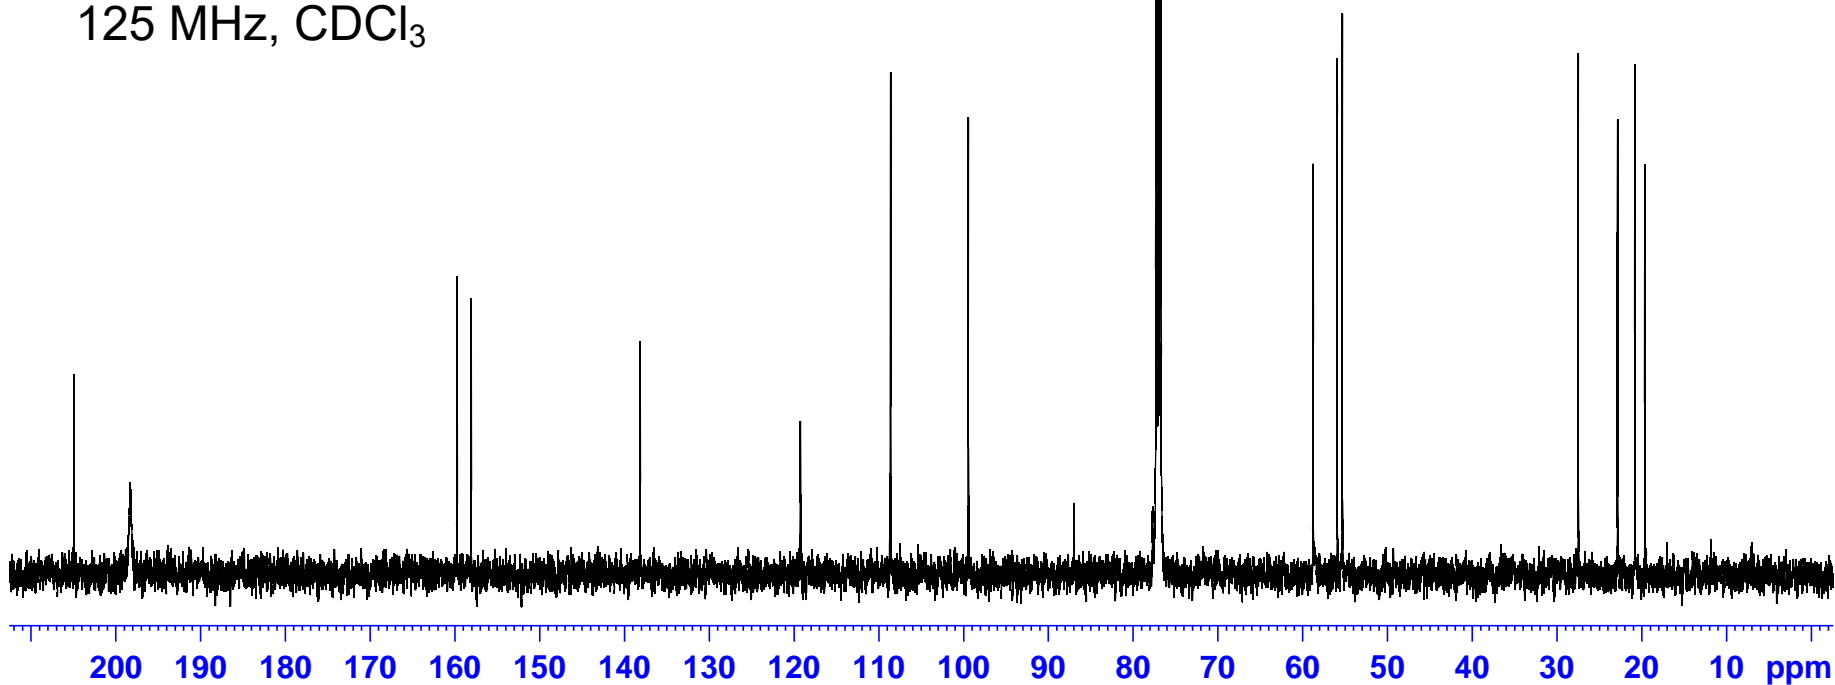

som.09g 1H, (MeO)2Ph-cyclizn, TIPS, 9/23/21

6.875  
6.870

6.512  
6.508

3.867  
3.839  
3.756  
3.725

2.506  
2.483  
2.430  
2.406  
2.398  
2.375

1.467  
1.452  
1.437  
1.422  
1.407  
1.152  
1.142  
1.137  
1.127

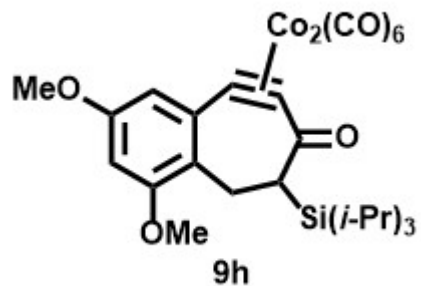

500 MHz, CDCl<sub>3</sub>

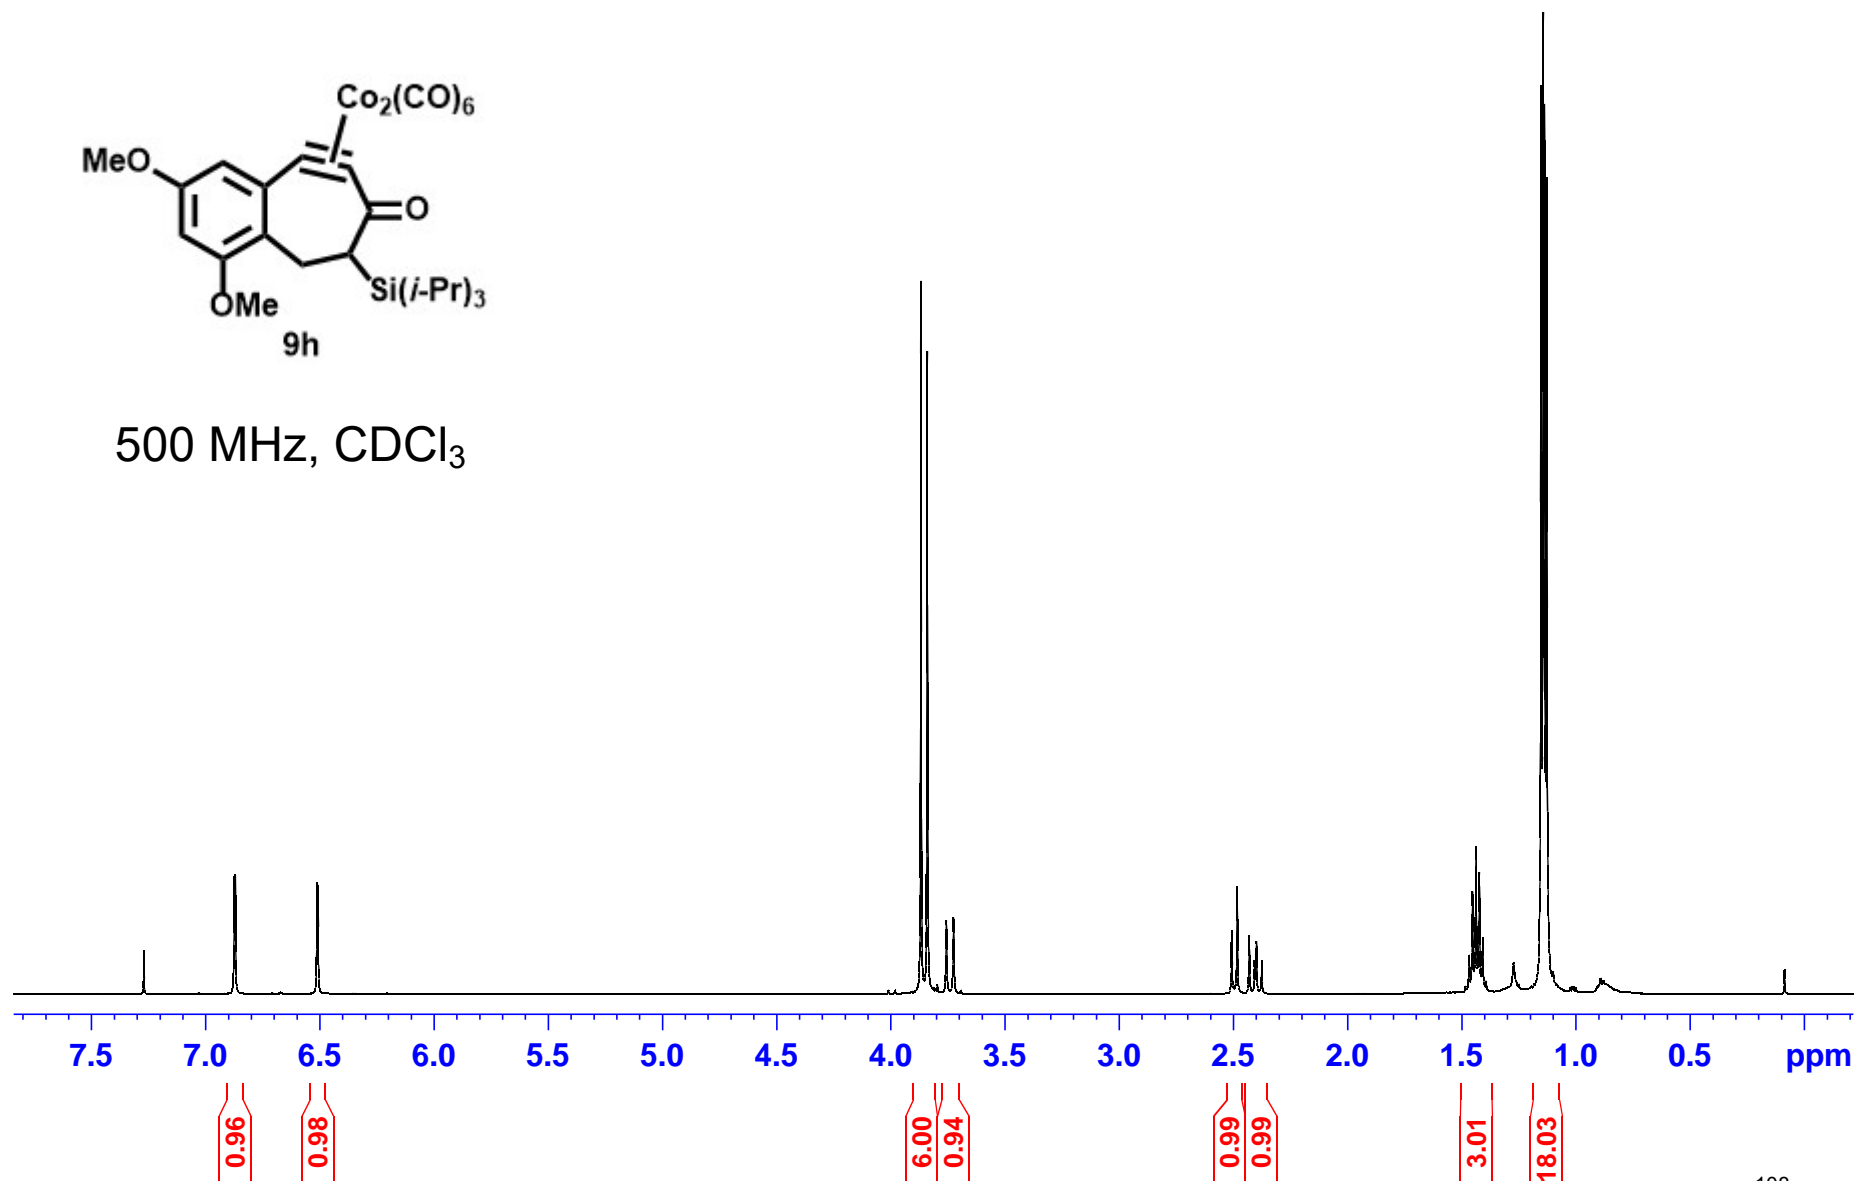

som.09g,  $^{13}\text{C}$ , (MeO) $_2$ Ph cyclizn, TIPS, 9/23/21

— 205.419 — 198.412 — 159.645 — 157.232 — 138.088 — 122.530 — 108.477 — 99.002 — 87.909 — 83.403 — 77.250 — 76.996 — 76.742 — 55.607 — 55.308 — 40.679 — 22.467 — 19.185 — 19.125 — 11.673

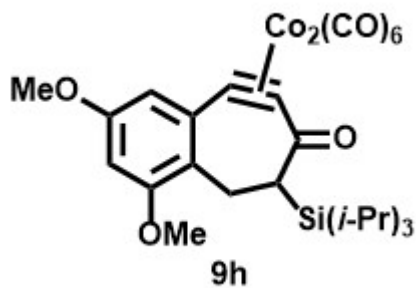

125 MHz,  $\text{CDCl}_3$

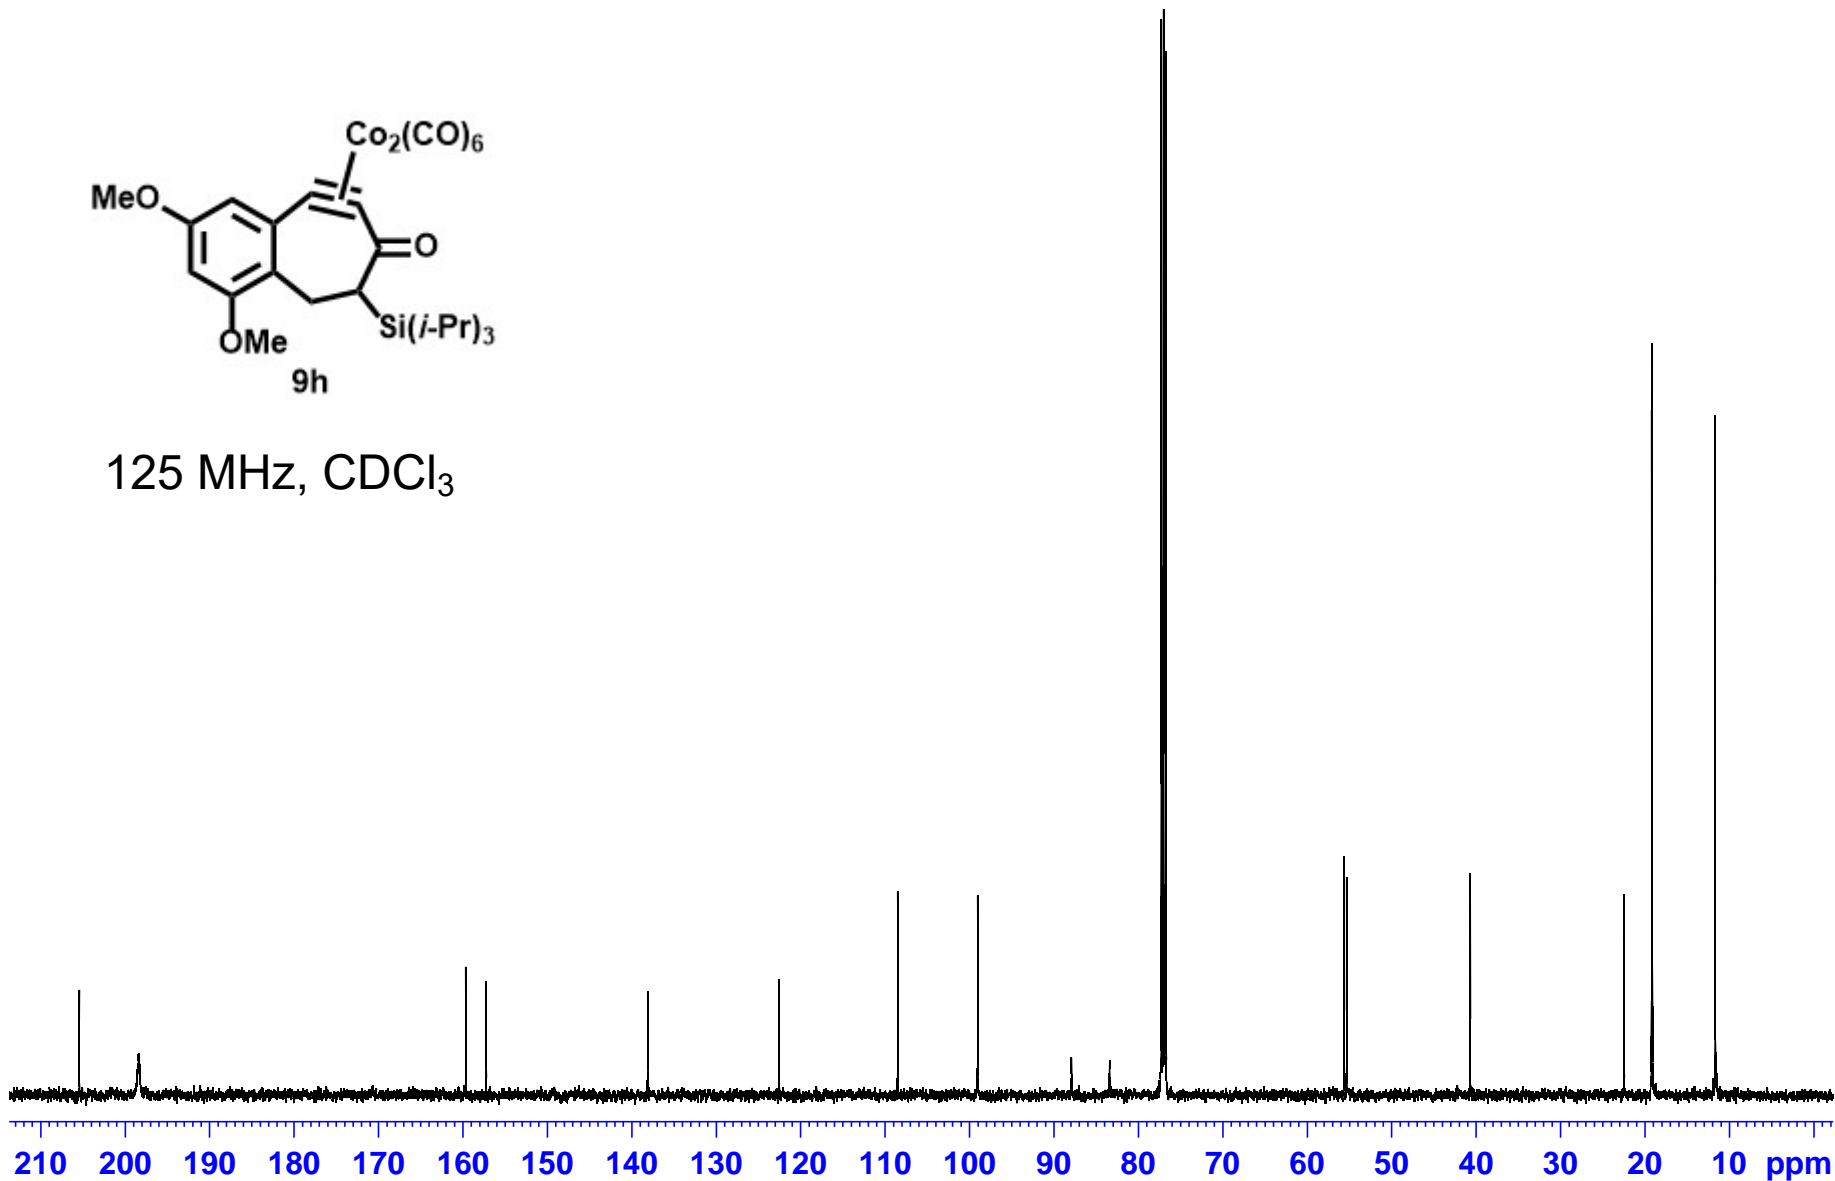

som.09i 11, cps 9i, 1st min fr 8/23/21

7.269

6.448  
6.444  
6.439

2.897  
2.894  
2.884  
2.880  
2.875  
2.871  
2.862  
2.858  
2.632  
2.628  
2.174  
2.171  
2.163  
2.152  
2.143  
1.979  
1.974  
1.964  
1.953  
1.948  
1.845  
1.835  
1.828  
1.824  
1.819  
1.691  
1.662  
1.599  
1.577  
1.555  
1.547  
1.416  
1.411  
1.406  
1.390  
1.385  
1.226

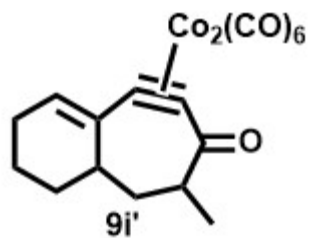

500 MHz, CDCl<sub>3</sub>

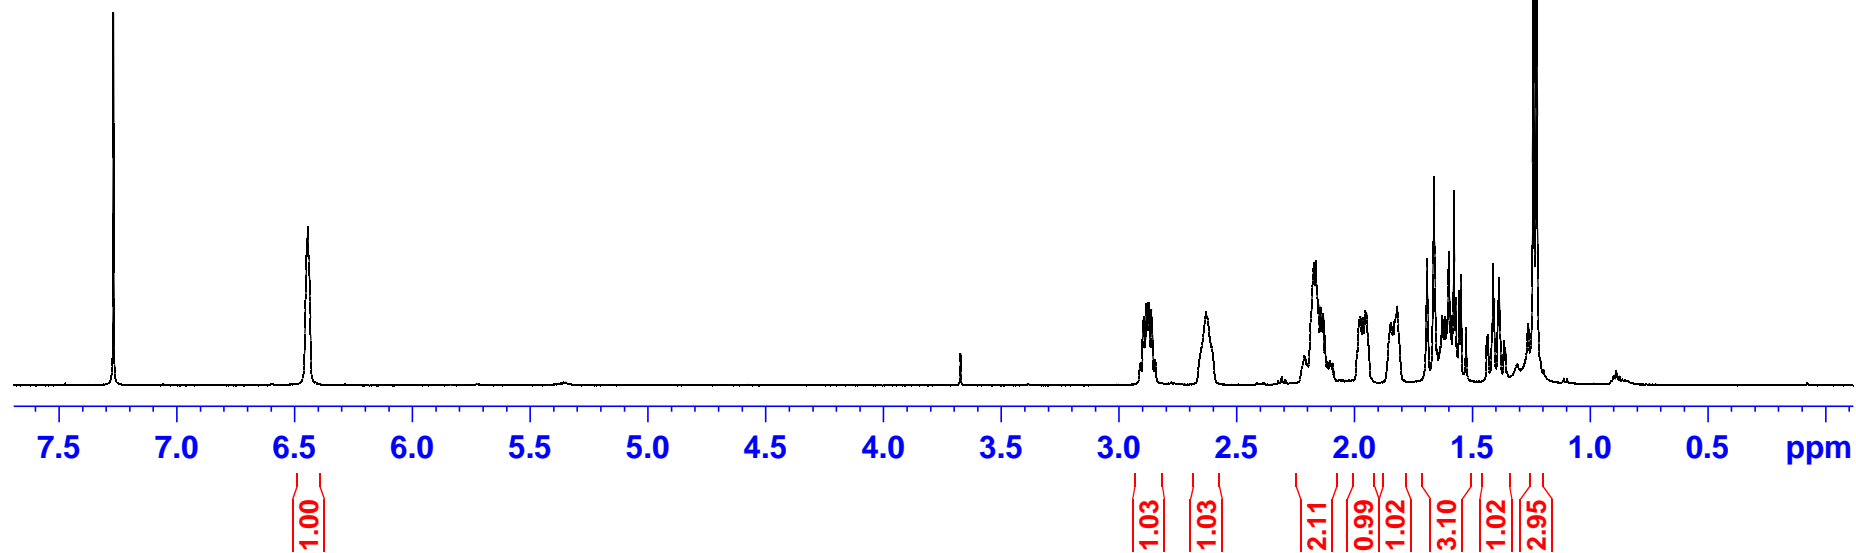

som.09i 1, fr1 (min), cyclohexene-Nazarov prod, 8/22/21

204.27  
198.68

137.82  
136.74

91.80

82.04  
77.25  
77.00  
76.74

48.48

42.16  
41.00

32.39

26.88

21.76

17.45

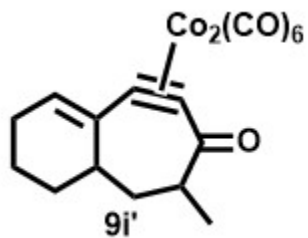

125 MHz, CDCl<sub>3</sub>

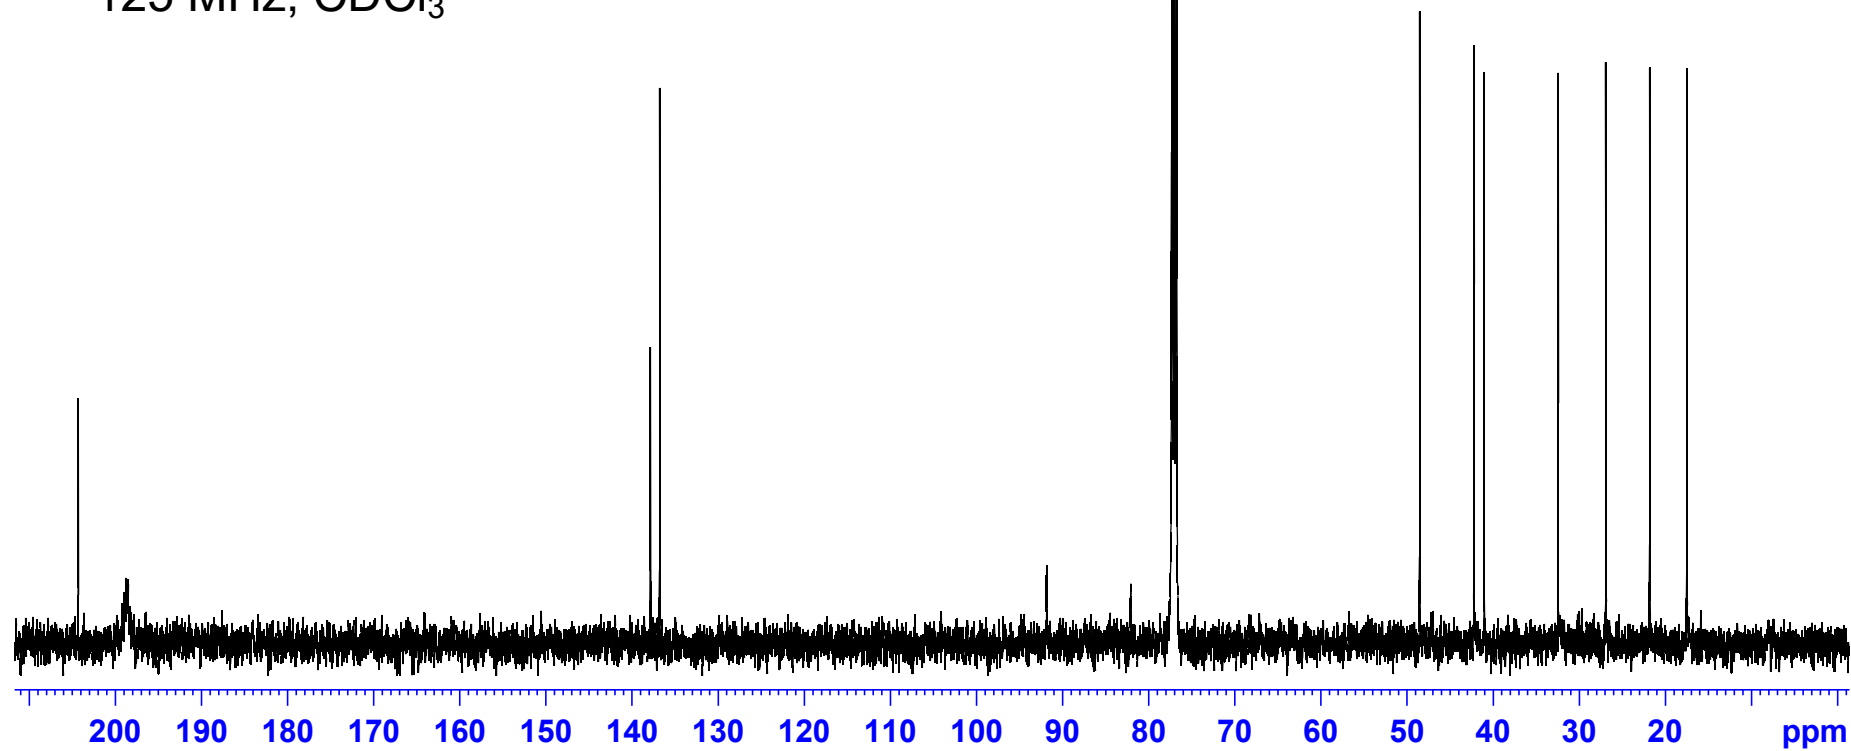

som.09i 5, cps 9i, 2nd maj fr 8/23/21

7.268

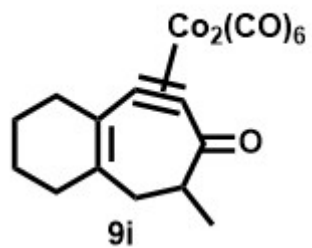

500 MHz, CDCl<sub>3</sub>

2.796  
2.793  
2.782  
2.779  
2.774  
2.771  
2.760  
2.757  
2.398  
2.395  
2.367  
2.345  
2.334  
2.311  
2.183  
2.174  
2.113  
2.102  
2.069  
1.775  
1.764  
1.761  
1.752  
1.748  
1.739  
1.735  
1.723  
1.688  
1.675  
1.667  
1.663  
1.655  
1.649  
1.641  
1.207  
1.193

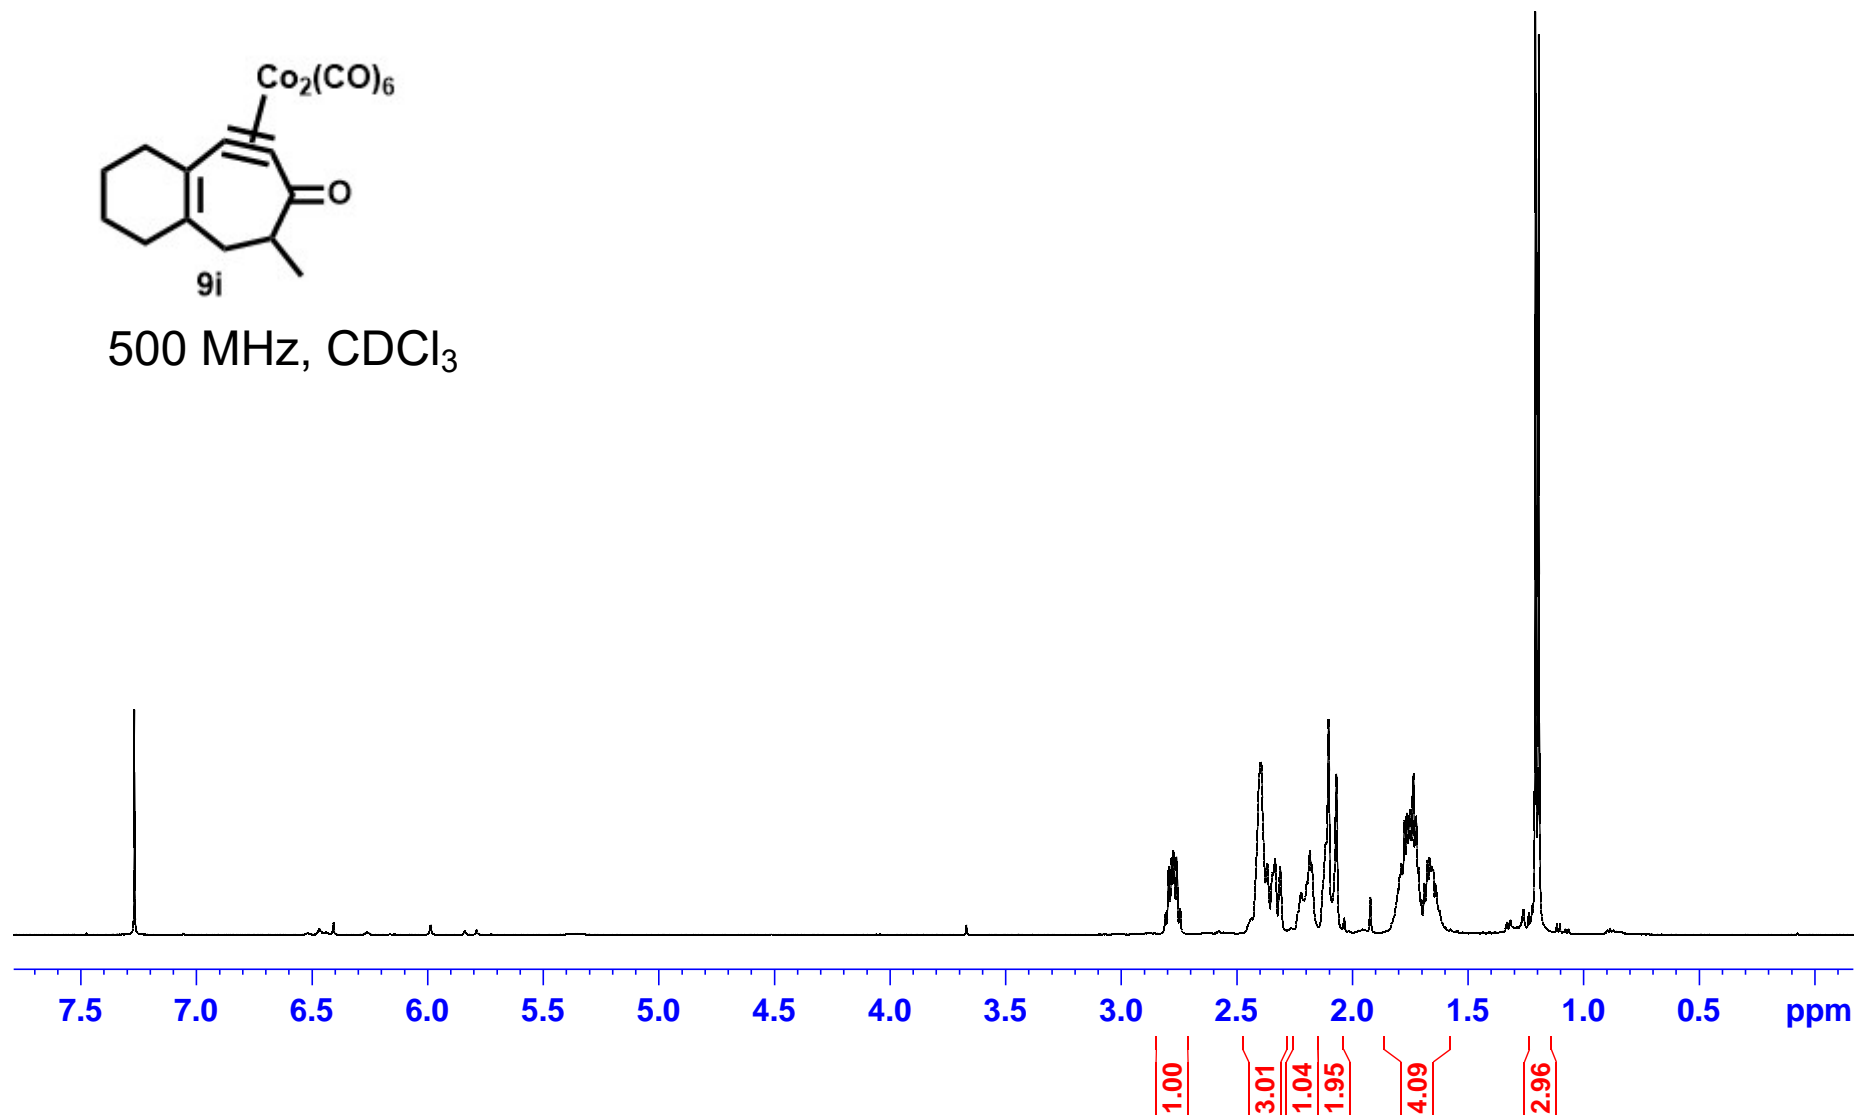



som.09i 6, <sup>13</sup>C, maj/2nd fr, cpd 9i-b, 8/23/21

— 204.568  
— 198.634

— 140.537  
— 128.754

— 91.740

78.017  
77.250  
76.997  
76.743

— 44.006  
— 39.946  
— 33.907  
— 29.806  
— 22.850  
— 22.599  
— 16.106

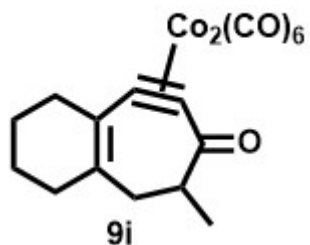

125 MHz, CDCl<sub>3</sub>

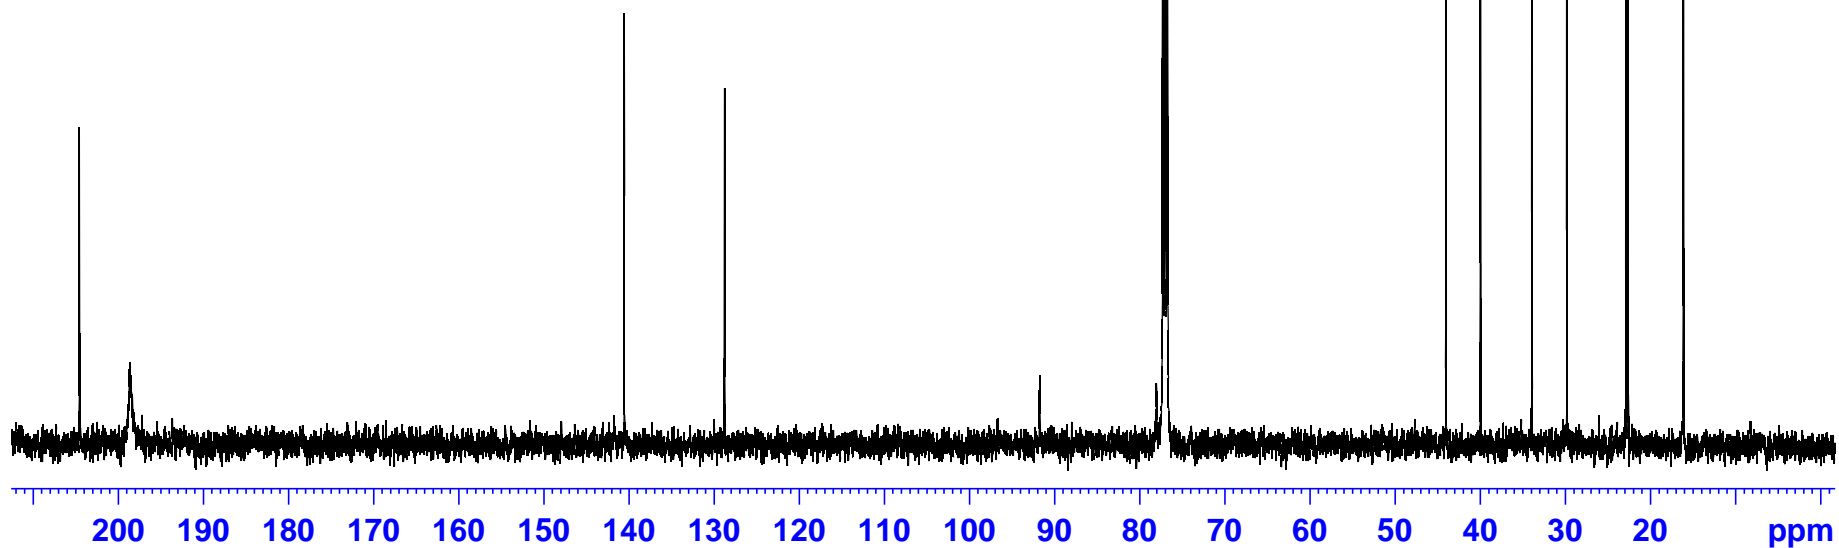

som.09j 3, 1H cyclohexenyl TIPS cycliz prod, 8/29/21

7.269  
6.456

2.731  
2.710  
2.516  
2.492  
2.441  
2.408  
2.325  
2.293  
2.206  
2.162  
2.153  
2.149  
1.782  
1.770  
1.759  
1.724  
1.713  
1.701  
1.369  
1.354  
1.339  
1.118  
1.110  
1.095

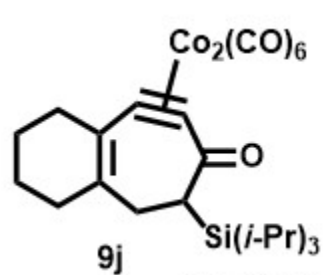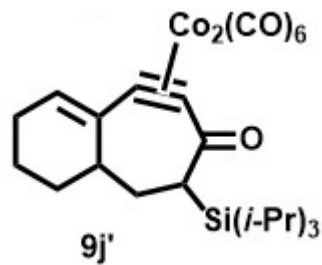

500 MHz, CDCl<sub>3</sub>

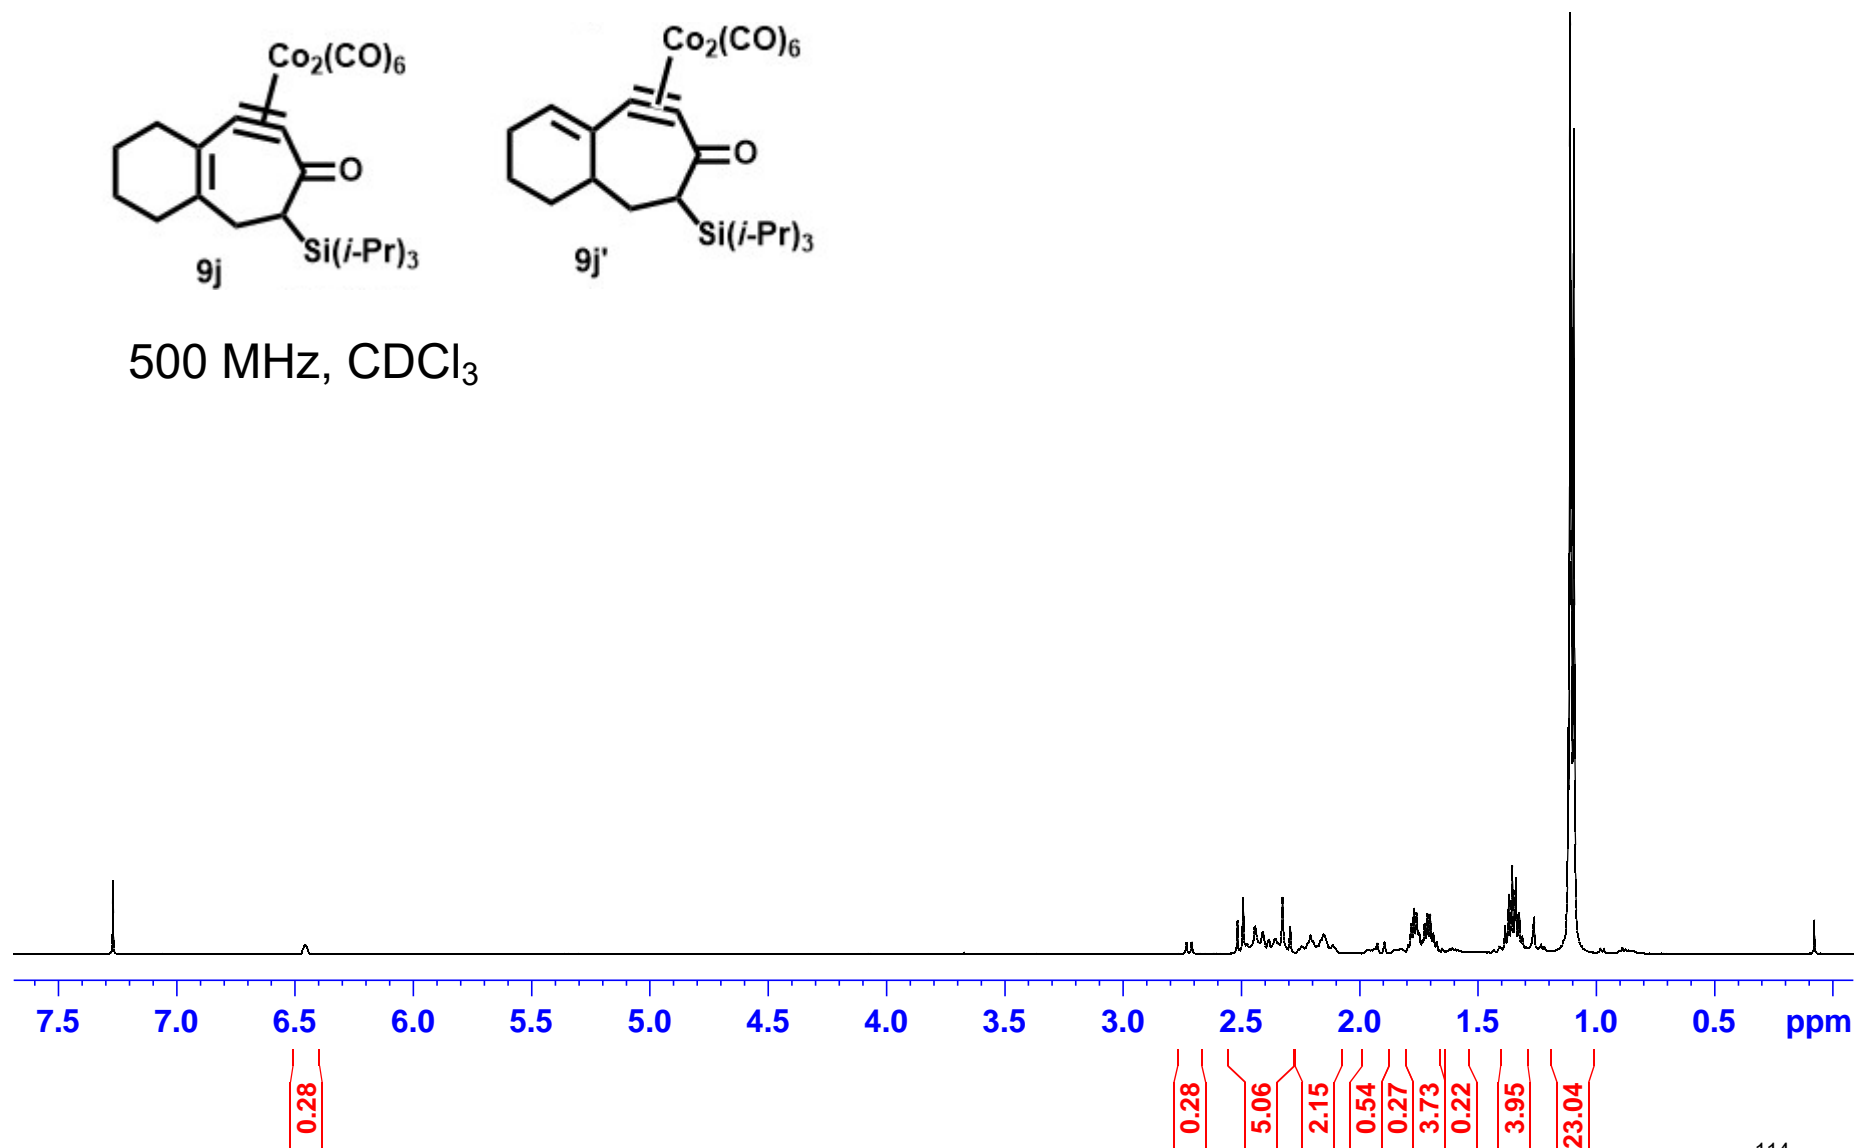

som.09j 4,  $^{13}\text{C}$ , cyclohexenyl cyclization TIPS, cpd 9j, 8/29/21

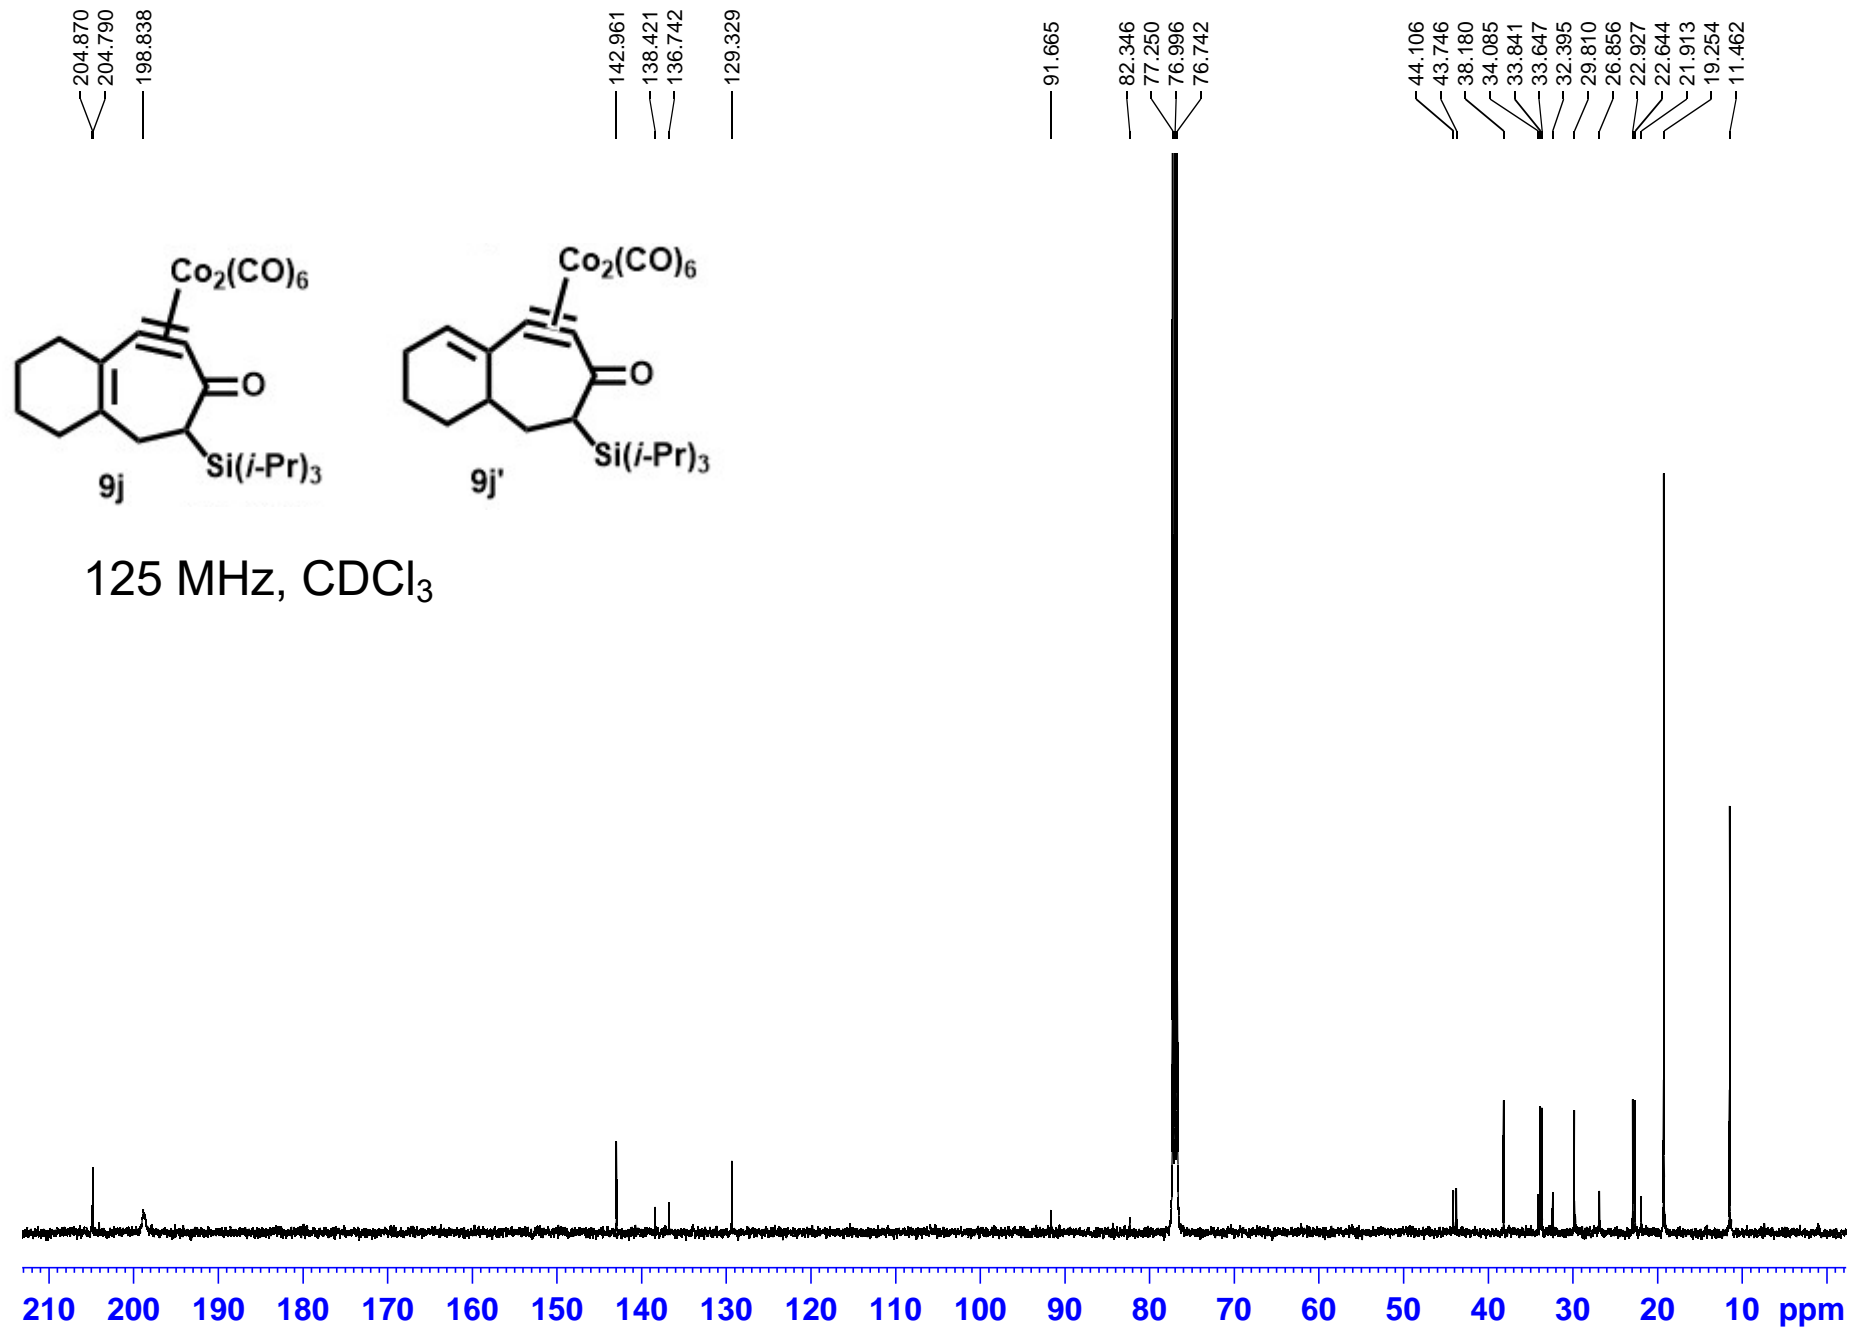

som.09k 16, , som 8k + SnCl4, 2days, fr1a 10/11/21

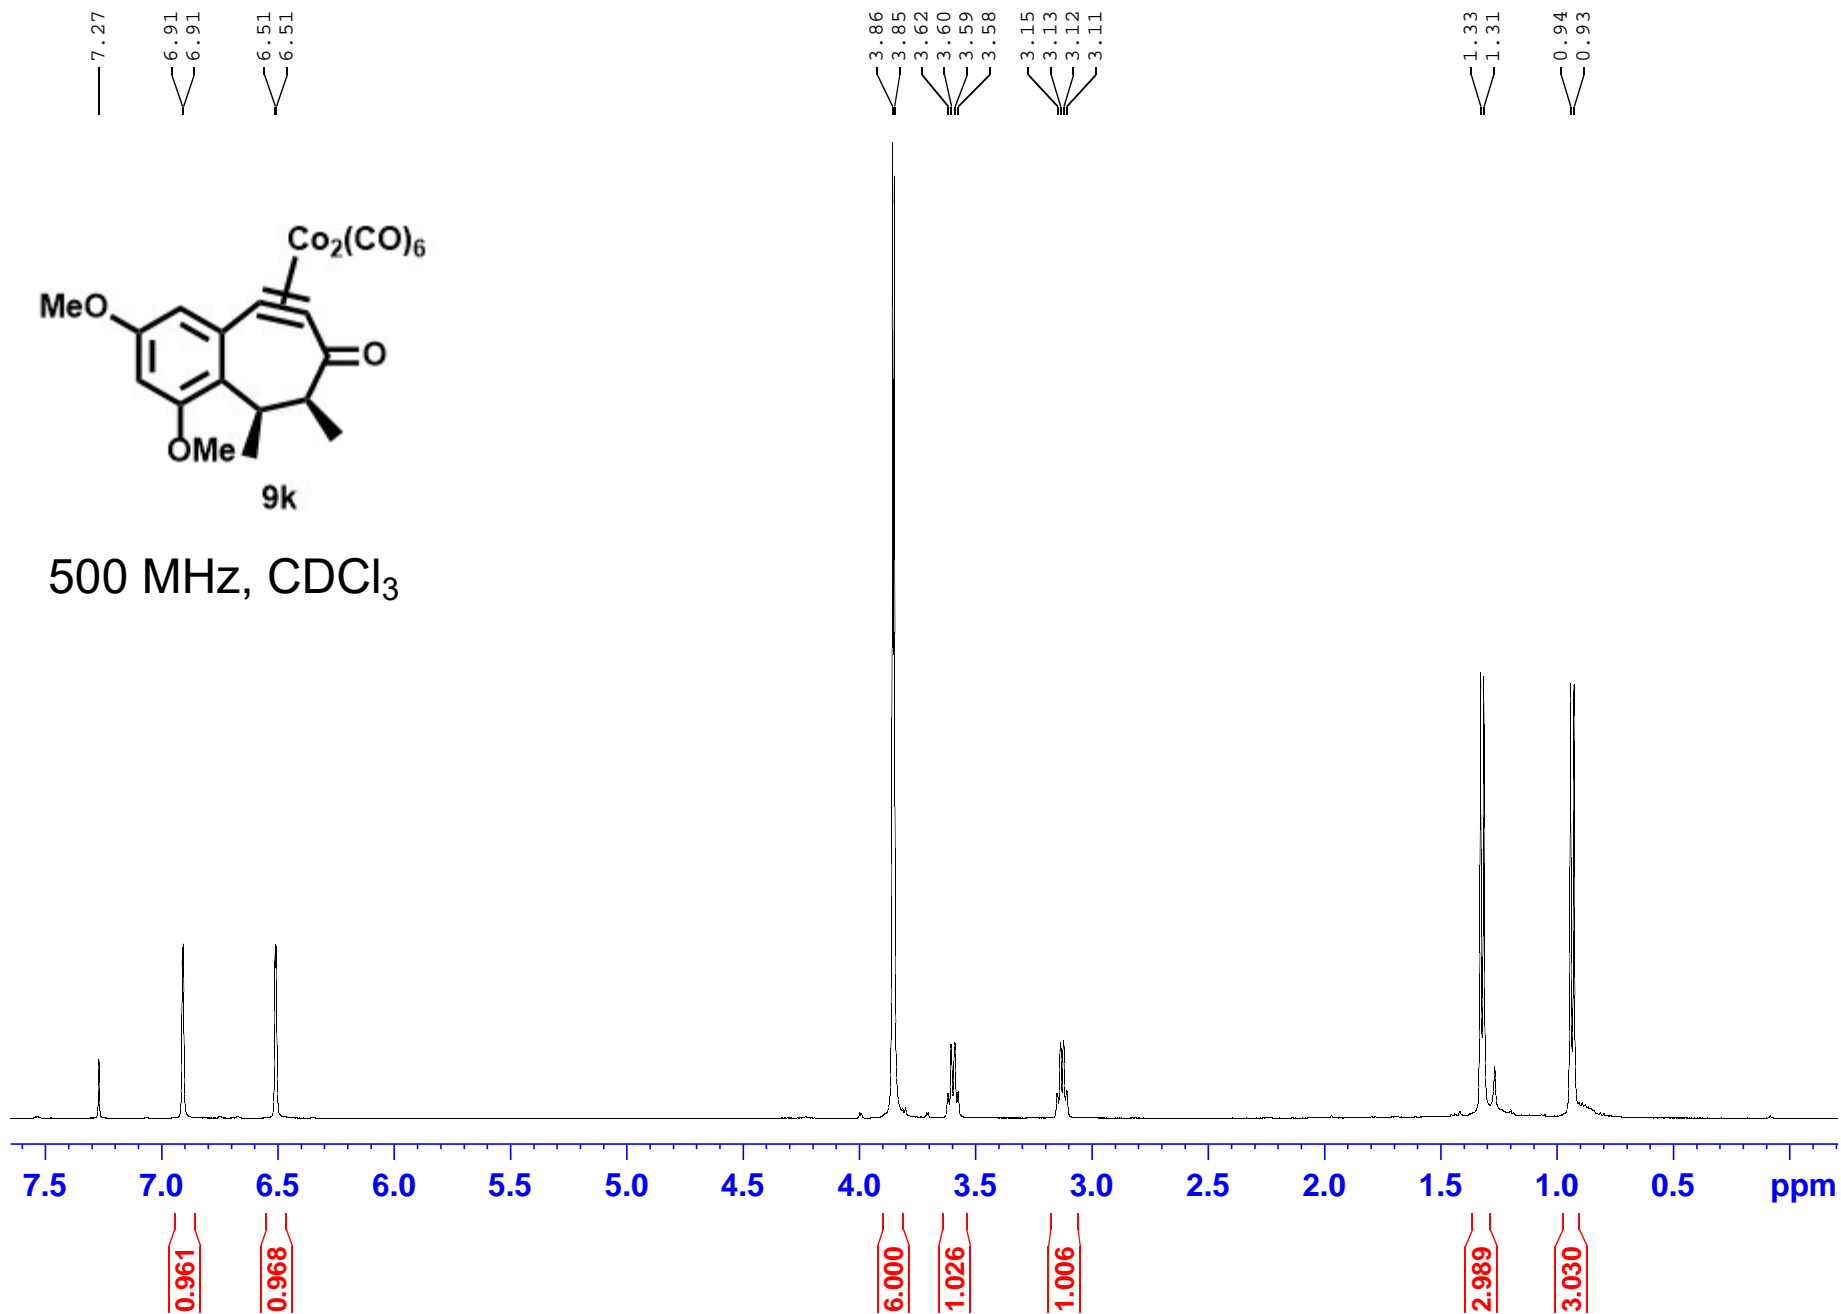

som.09k 17, <sup>13</sup>C, tiglic cyclizn prod, 10/11/21

203.07  
198.39

159.30  
157.19

135.38

126.50

109.25

99.72

89.87

80.10  
77.25  
77.00  
76.74

55.82  
55.18

48.06

34.40

15.01  
14.44

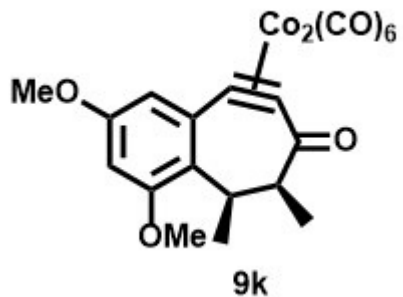

125 MHz, CDCl<sub>3</sub>

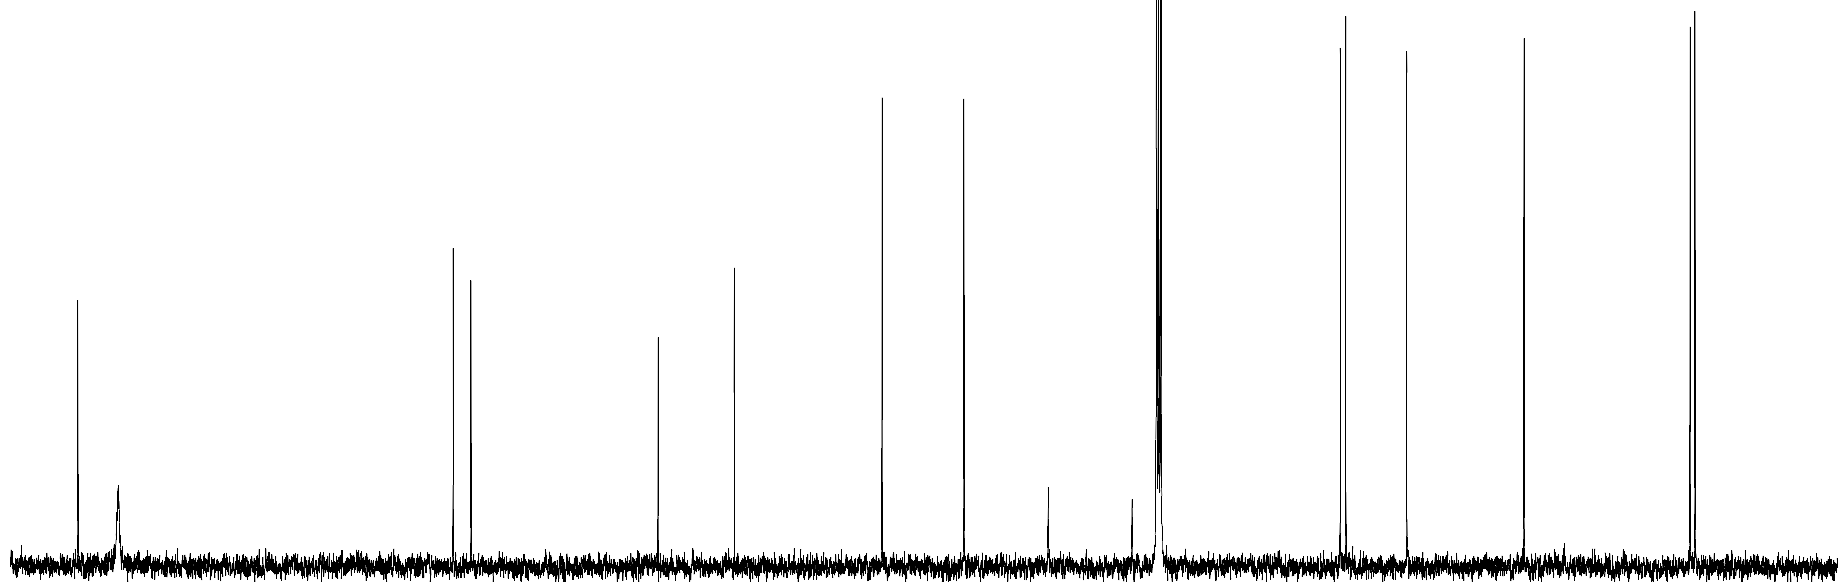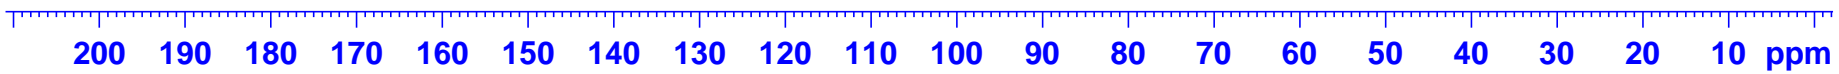

som.09k 13, , som 8k + SnCl4, 2days, fr2 10/9/21

7.35  
7.34  
7.32  
7.31  
7.27

6.73  
6.73  
6.54

3.80

1.99  
1.97  
1.86

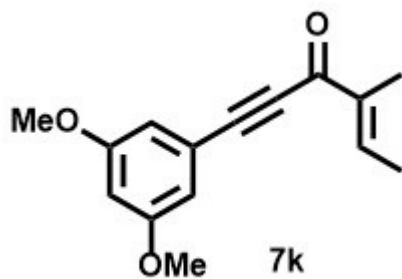

500 MHz, CDCl<sub>3</sub>

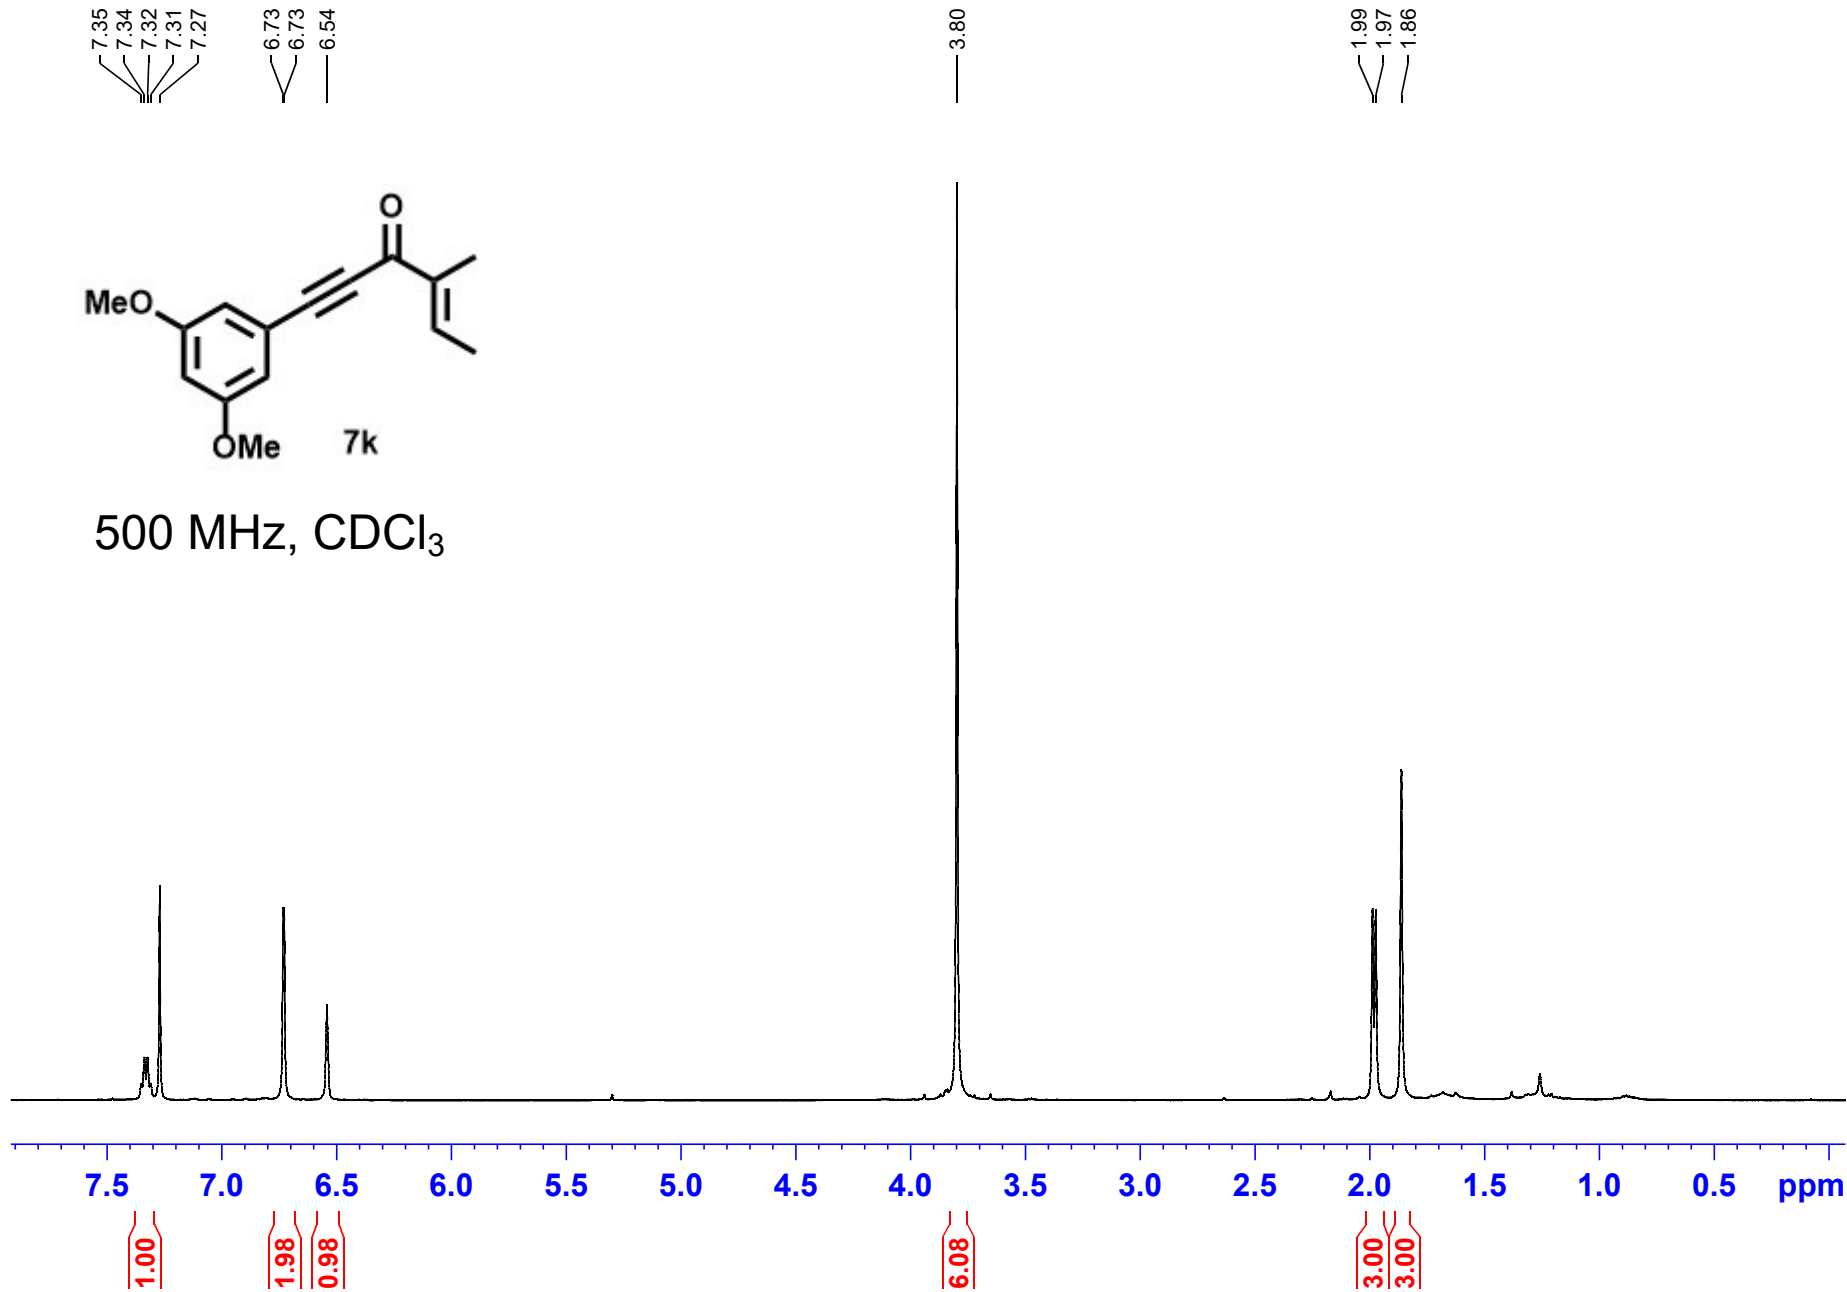

som.09k 14, 13C fr2, decomp SM, 10/9/21

180.13

160.59

145.29

139.50

121.70

110.32

103.65

90.86

85.37

77.00  
76.74

55.48

15.18

10.23

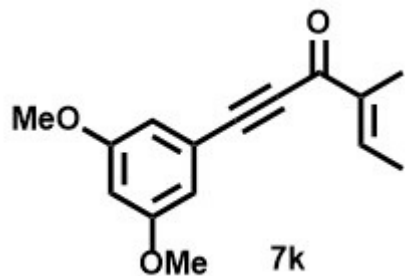

125 MHz, CDCl<sub>3</sub>

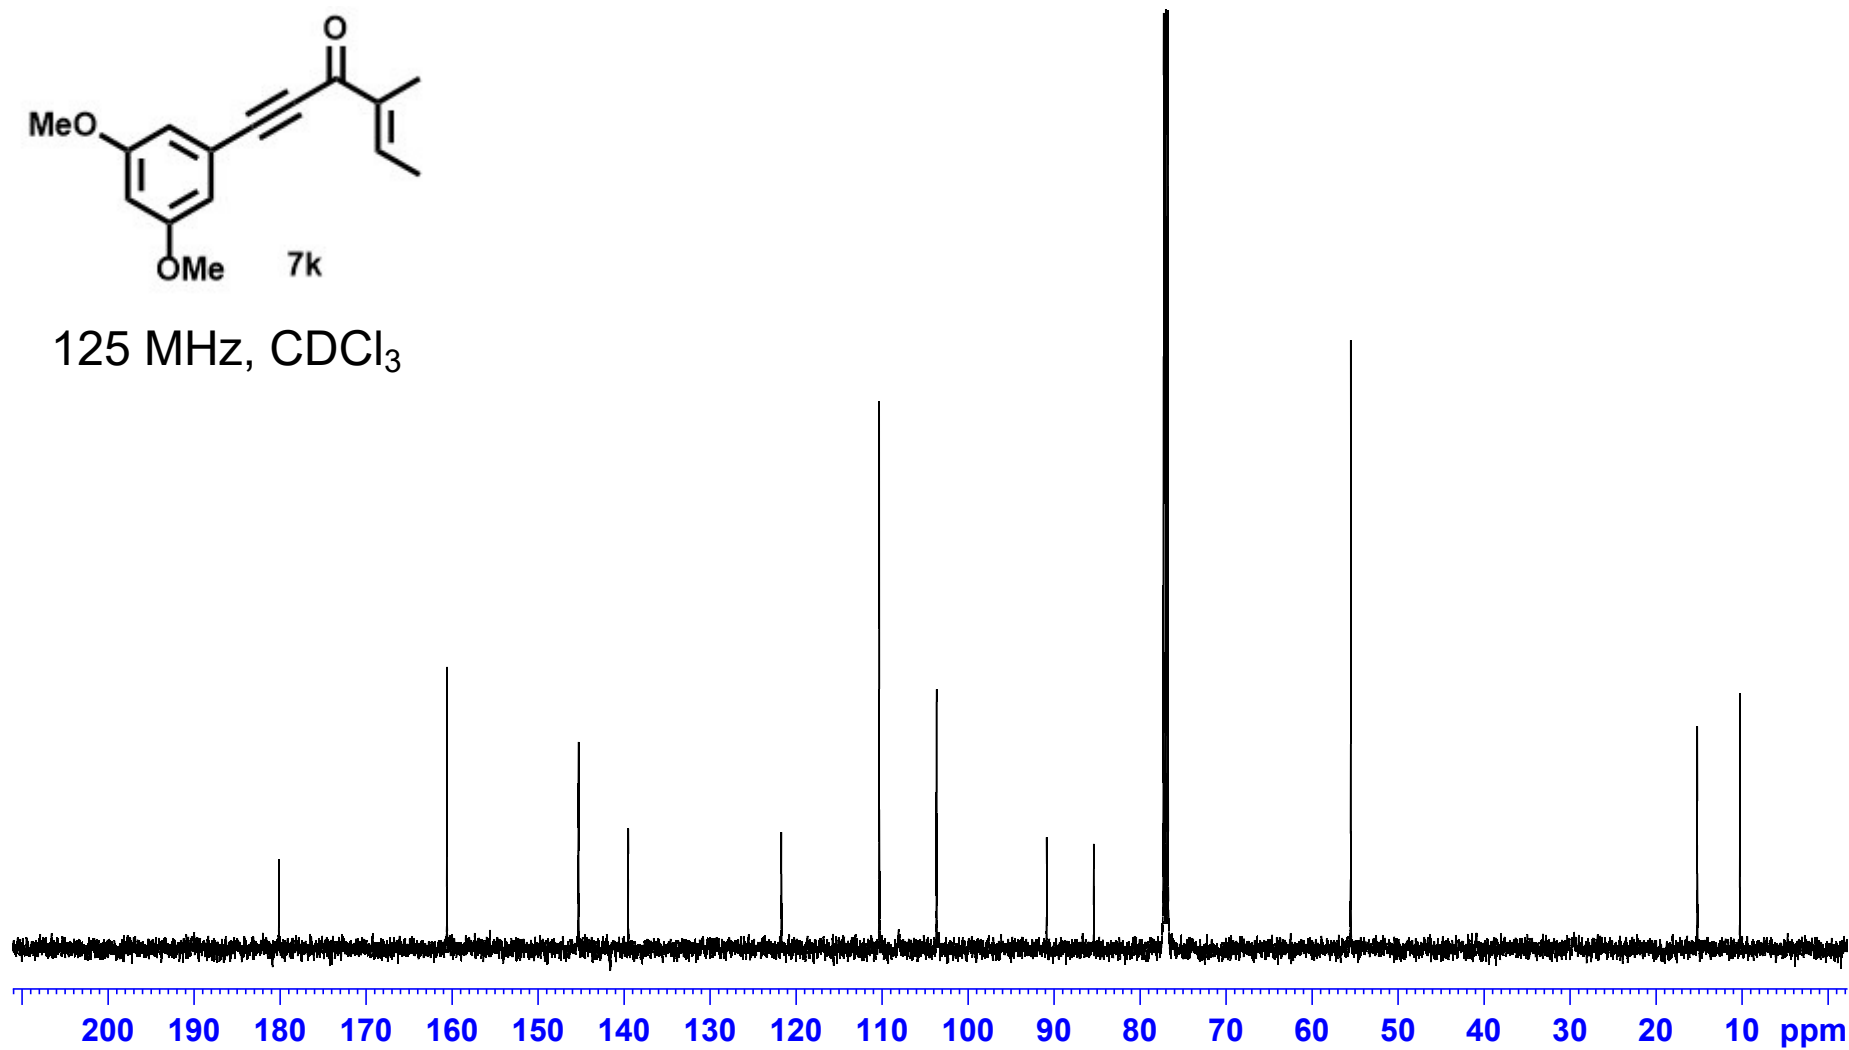

som.010 1, hydrosil of iPr prod, 9/7/21

7.270  
7.079  
6.495  
6.490  
6.445  
6.441

3.835  
3.828

3.052  
3.048  
3.022  
3.017  
2.926  
2.906  
2.896  
2.876  
2.323  
2.318  
2.309  
2.304  
2.299  
2.289  
2.285  
2.079  
2.065  
2.051  
2.038  
0.995  
0.980  
0.964  
0.953  
0.939  
0.852  
0.839  
0.808  
0.793  
0.785  
0.778  
0.770  
0.754

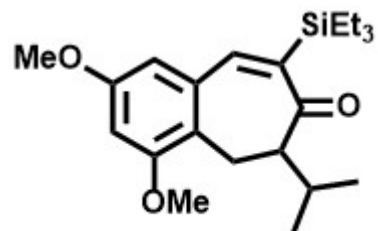

10

500 MHz, CDCl<sub>3</sub>

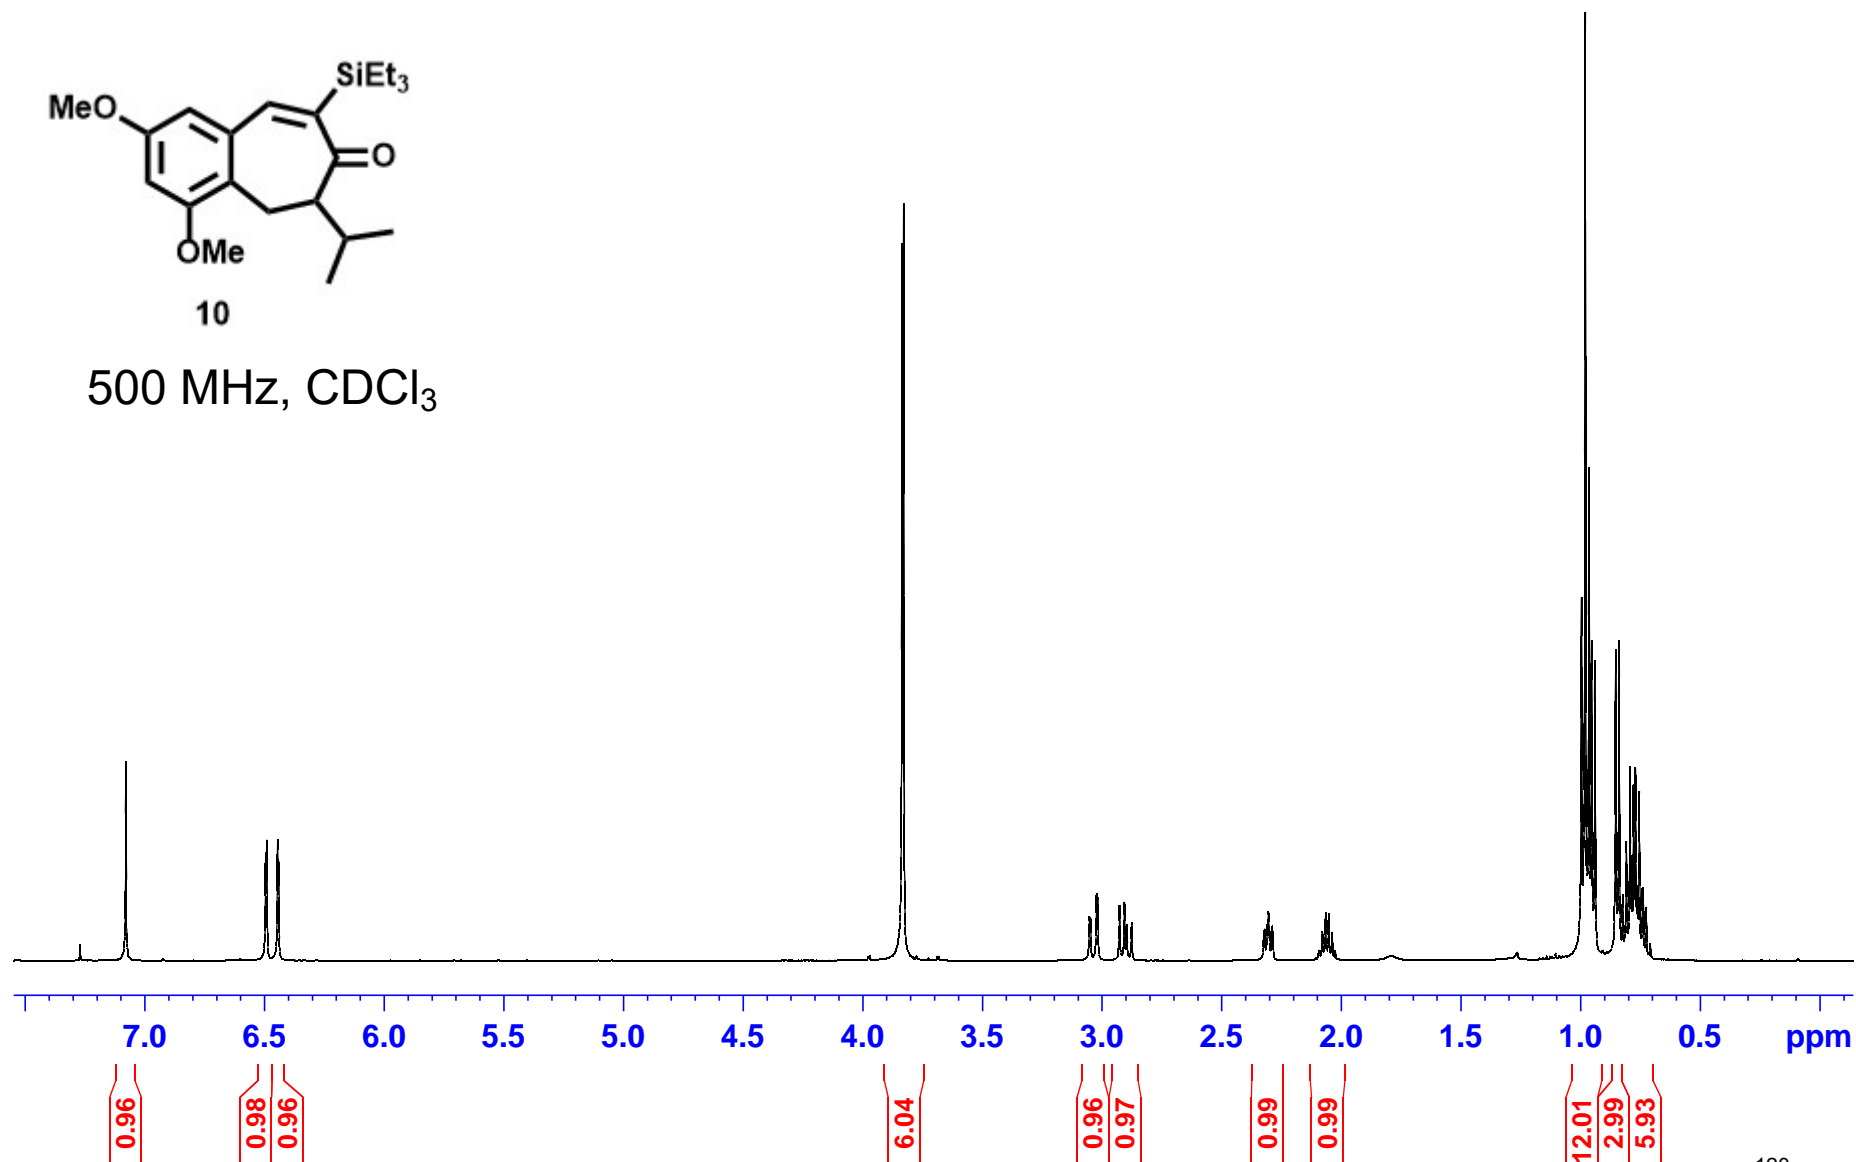



som.010 2 13C, hydrosilylation, iPr cycliz prod, 9/7/21

208.563  
158.594  
157.656  
147.541  
142.394  
137.910  
120.997  
107.079  
99.767  
77.251  
76.997  
76.742  
60.762  
55.888  
55.340  
28.507  
21.559  
21.068  
19.131  
7.453  
3.503

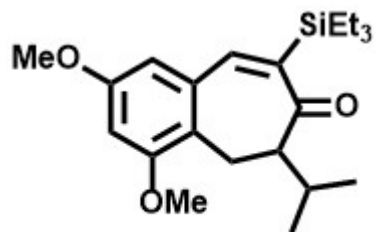

125 MHz, CDCl<sub>3</sub>

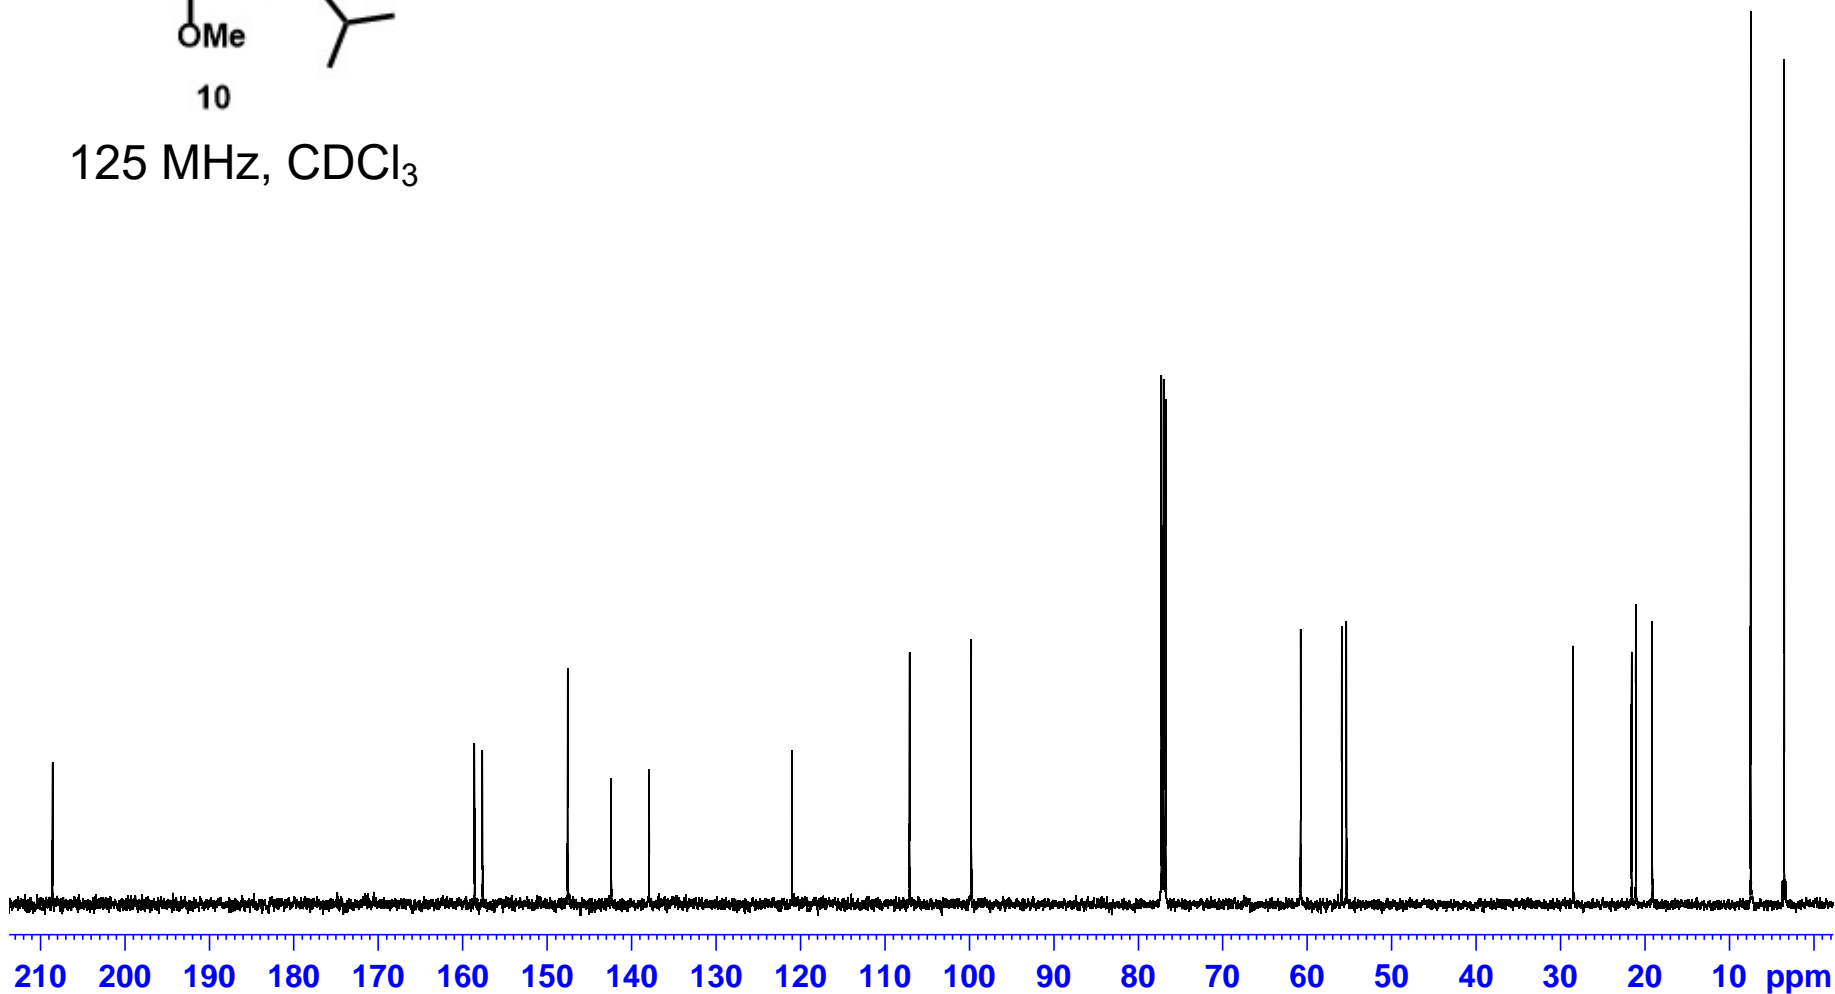

Supplement: d1ob02256c1.pdf [file d1ob02256c1.pdf]
